# Supplementary material
Source: HighWire-hosted journal article supplement (https://dmd.aspetjournals.org/highwire/filestream/77095/field_highwire_adjunct_files/0/DMD320R2_Supp2.xlsx)
Supplement: DMD320R2_Supp2.xlsx [file DMD320R2_Supp2.xlsx]

## Sheet: Raw Data File
Development of Robust QSAR Models for CYP2C9, CYP2D6, and CYP3A4 Catalysis and Inhibition
Eric Gonzalez*, Sankalp Jain*, Pranav Shah*, Nao Torimoto-Katori, Alexey Zakharov, Ðắc-Trung Nguyễn, Srilatha Sakamuru, Ruili Huang, Menghang Xia, R. Scott Obach, Cornelis E.C.A. Hop, Anton Simeonov & Xin Xu.
Drug Metabolism and Disposition
DMD-AR-2020-000320
Raw Data Table
Headers:
SMILES	Chemical Structure
Substrate Class	Half-Life Class based on data derived from Supersome clearance assay: 0-30 min - 1; 30-60 min - 2; 60 - 120 min - 3; >120 min - 4; Blank - No Data
Activity Log AC50 (M)	Potency of compound in log units (Molar) based on data derived from the P450-Glo assay. Derived from the Hill fit of the response curve, 50% of the maximum acitivity response. Blank - No Data
SMILES	CYP2C9 Substrate Category	CYP2D6 Substrate Category	CYP3A4 Substrate Category	CYP2C9 Activity Log AC50 (M)	CYP2D6 Activity Log AC50 (M)	CYP3A4 Activity Log AC50 (M)
CC(C)(C)C1=C(O)C=CC(O)=C1	4	4	4	-4.92127	-4.77127	-5.02127
OC(=O)C\C(=C/C(O)=O)C(O)=O		4		-4	-4.41003	-4
CC(C)=CCC\C(C)=C\CO	3	1	4	-4.41003	-4	-4.61003
CC1=CC(N)=C2C=C(NC(=O)NC3=CC4=C(C=C3)N=C(C)C=C4N)C=CC2=N1	4	4		-4	-5.06003	-4
CC1=C(O)C(CN)=C(CO)C=N1	4	4	4	-4	-4	-4
N[S+]([O-])(=O)C1=CC=C(C=C1)C(O)=O	3	4	1
OC(CCN1CCCCC1)(C2=CC=CC=C2)C3=CC=CC=C3	4	1	4	-4	-6.21003	-4
OC1=C(SC2=C(O)C=CC(Cl)=C2)C=C(Cl)C=C1	1	4	3	-4.91003	-4.91003	-5.01003
CN(C)CC\C=C1/C2=C(SC3=C1C=C(Cl)C=C3)C=CC=C2	1	1	1	-4	-5.91003	-4.61003
OP(O)(=O)OP(O)(O)=O	1		1	-4.62127	-4	-4
CN(C)CCC=C1C2=C(C=CC=C2)C=CC3=C1C=CC=C3	2	1	4	-4	-5.24065	-4.31063
CCC1=C(C(=O)C2=CC(Br)=C(O)C(Br)=C2)C3=C(O1)C=CC=C3	1	4	3	-5.76003	-4.41003	-5.01003
OC(=O)[C@@H]1CCCN1	4	4	4	-4	-4	-4
OC(=O)CP(O)(O)=O	4	1		-4	-4	-4.81003
CNCCC=C1C2=C(CCC3=C1C=CC=C3)C=CC=C2	3	1	4	-4	-5.32127	-4.72127
ClC1=CC=C2N(C3CCN(CCCN4C(=O)NC5=C4C=CC=C5)CC3)C(=O)NC2=C1	4	3	1	-4	-5.91003	-4
ClC1=C(C=CC=C1)C2=NC(=NO2)C3=CC=NC=C3	2	1	1	-5.26003	-5.46003	-4.36003
CC1=C(C)C(NC2=NC(SCC(O)=O)=NC(Cl)=C2)=CC=C1	1	4	4	-4.56003	-4	-4
OC(=O)CCC1=NC(=C(O1)C2=CC=CC=C2)C3=CC=CC=C3	3	4	1	-4	-4	-4
CC[C@@]1(O)C(=O)OCC2=C1C=C3N(CC4=C3N=C5C=CC(O)=C(CN(C)C)C5=C4)C2=O			4	-4	-4	-4
NC(=O)C1=C(N)N(CC2=CC(Cl)=C(C(=O)C3=CC=C(Cl)C=C3)C(Cl)=C2)N=N1	4	2	1	-4.42127	-4.57127	-5.77127
OC(=O)CCCCCCCC(O)=O	2	4		-4	-4	-5.06003
ClC1=CC2=C(OC3=C(C=CC=C3)N=C2N4CCNCC4)C=C1	4	1	4	-4	-5.36003	-5.46003
CC(C)NCC(O)COC1=CC=C(CC(N)=O)C=C1	2	3	4
CC(=O)C1=CC=C(C=C1)S(=O)(=O)NC(=O)NC2CCCCC2	3	4	3	-4.81003	-4	-4
NC12CC3CC(CC(C3)C1)C2	4	4	3	-4	-4	-4
CCCCC\C=C/C\C=C/C\C=C/C\C=C/CCCC(=O)NCC(O)=O	1	1	1	-4.71003	-4.56003	-4.61003
OC1=CC=C(C=C1)C2=CC(=O)C3=C(O2)C=C(O)C=C3O	3	4	2	-4.67127	-4.92127	-5.22127
CC1=C(C)C(=O)C(CCCCC#CCCCC#CCO)=C(C)C1=O	1	2	1	-5.51003	-5.31003	-7.21003
NC1=C2CCCCC2=NC3=CC=CC=C13	3	1	4	-4	-5.01003	-4
CN1C=NC(=C1SC2=NC=NC3=C2N=CN3)[N+]([O-])=O	4	4	1	-4	-4	-4
NC1=NC2=C(N=CN2COCCO)C(=O)N1	4	4	2	-4	-4	-4
CC(=O)OC1=C(C=CC=C1)C(O)=O	1			-4	-4.81003	-5.56003
CCN(CC)CCNC(=O)C1=CC=C(NC(C)=O)C=C1	3	4	4	-4	-4.81003	-4
CC(=O)NC1=NN=C(S1)S(N)(=O)=O	3	4	4	-4	-4	-4
COC(=O)C1=CCCN(C)C1	3	4		-4	-4	-4
C[N+]1(C)C2CCC1CC(C2)OC(=O)C(CO)C3=CC=CC=C3	4
CCNC(=O)N1CCN(CCCC(C2=CC=C(F)C=C2)C3=CC=C(F)C=C3)CC1	1	1	1	-4	-5.66003	-4
NC(=N)NC(=O)C1=NC(Cl)=C(N)N=C1N	4	4	4	-4	-4	-4
NCCCCCC(O)=O		4	3	-4	-4	-6.86003
CN(C)CCC=C1C2=C(CCC3=C1C=CC=C3)C=CC=C2	2	1	2	-4	-5.14065	-4.41063
CCCCC1=C(C(=O)C2=CC(I)=C(OCCN(CC)CC)C(I)=C2)C3=C(O1)C=CC=C3	1	2	1	-5.11003	-4.91003	-4
CC(C)NCC(O)COC1=C(CC=C)C=CC=C1	4	1	4	-4	-5.11565	-4.18001
CN(C)C1=NC(=NC(=N1)N(C)C)N(C)C	2	2	4	-4	-4	-4
CCC1(CCC(=O)NC1=O)C2=CC=C(N)C=C2	4	4	4	-4	-4	-4.96003
COC1=CC=C(C=C1)C(=O)N2CCCC2=O	4	4	4	-4	-4	-4
CC(COC1=CC=CC=C1)N(CCCl)CC2=CC=CC=C2	4		4	-4.91565	-6.14065	-4
CC(NC(C)(C)C)C(=O)C1=CC=CC(Cl)=C1	3	4	3	-4	-4.96003	-4.61003
CCN1CCC2=C(CC1)N=C(N)O2	4	4		-4	-4	-4
CN(C)CCC(C1=CC=C(Br)C=C1)C2=CC=CC=N2	4	1	4
N\C(NCC1=CC=CC=C1)=N/C(=O)C2=NC(Cl)=C(N)N=C2N	4	2	4	-4	-5.27127	-4
CCCCNC1=CC(=CC(=C1OC2=CC=CC=C2)S(N)(=O)=O)C(O)=O	4	4	4	-4	-4	-4
CC(C)COCC(CN(CC1=CC=CC=C1)C2=CC=CC=C2)N3CCCC3	1	1	1	-4.56003	-7.46003	-5.01003
CC(C)NCC(O)COC1=CC=C(CCOCC2CC2)C=C1	3	1	4	-4	-4.36063	-4.21063
O=C1CC2(CCCC2)CC(=O)N1CCCCN3CCN(CC3)C4=NC=CC=N4	4	1	1	-4	-4.81565	-4.76565
NC(CO)C(=O)NNCC1=C(O)C(O)=C(O)C=C1		4		-4.41003	-4.36003	-4
CN1C(C2=CC=C(Cl)C=C2)S(=O)(=O)CCC1=O	4	4	3	-4	-4	-4
C(OC1=C(C=CC=C1)C2CC2)C3=NCCN3	4	1	4	-4	-5.36003	-4
OC(=O)CCCC1=CC=C(C=C1)N(CCCl)CCCl	1	1	1	-4	-4	-4
CC(C)(OC1=CC=C(C=C1)C2CC2(Cl)Cl)C(O)=O	3	4	3	-4.69065	-4	-4
O=C1CCC2=C(N1)C=CC(OCCCCC3=NN=NN3C4CCCCC4)=C2	4	4	2	-5.21003	-4	-4.96003
CN1C=NC2=C1C(=O)N(C)C(=O)N2C	4	4	4	-4	-4	-4
ClCCN(CCCl)P1(=O)NCCCO1	3	4	4	-4	-4	-4
CCCNC(=O)N[S+]([O-])(=O)C1=CC=C(Cl)C=C1	3	4	3
CN(C)CC[C@@H](C1=CC=C(Cl)C=C1)C2=NC=CC=C2	4	1	4	-4	-4.94065	-4
CN(C)CCC(C1=CC=C(Cl)C=C1)C2=CC=CC=N2	4	1	4
NC(=O)N1C2=C(C=CC=C2)C=CC3=C1C=CC=C3	4	4	4	-4	-4	-4
CCC1=CC(=CC=C1)N(C)C(=N)NC2=C3C=CC=CC3=CC=C2	3	1	2	-4	-6.96003	-4
ClC1=CC2=C(OC(=O)N2)C=C1	4	3	3	-4	-4	-4.71003
NS(=O)(=O)C1=C(Cl)C=C2N=CNS(=O)(=O)C2=C1	4	4	4	-4	-4	-4
ClC1=CC=C(CN2C(CN3CCCC3)=NC4=C2C=CC=C4)C=C1	1	1	1	-4.91003	-6.51003	-5.96003
ClC1=CC=CC(=C1)N2CCNCC2	4	1	1	-4	-5.06003	-4
CN1CCC(CC1)=C2C3=C(C=CC=C3)C=CC4=C2C=CC=C4	2	1	2	-4	-5.66003	-4
CN1CCN(CC1)C2=NC3=C(NC4=C2C=CC=C4)C=CC(Cl)=C3	1	1	3	-4.41003	-4.86003	-4.76003
CCN(CC)CCCC(C)NC1=CC=NC2=C1C=CC(Cl)=C2	4	1	2	-4	-4.82127	-4
CN(C)CCCN1C2=C(CCC3=C1C=C(Cl)C=C3)C=CC=C2	3	1	1	-4	-6.06003	-4.56003
CN(C1CCCCC1)C(=O)CCCOC2=CC3=C(NC(=O)C=C3)C=C2	4	3	1	-4.86003	-4	-5.06003
CN(C)CCCN1C2=C(SC3=C1C=C(Cl)C=C3)C=CC=C2	3	1	1	-4.41003	-7.21003	-4.76003
CCN1N=C(C(O)=O)C(=O)C2=C1C=C3OCOC3=C2	4	4	3	-4	-4	-4
CCCC(C)(COC(N)=O)COC(=O)NC(C)C	4	4	4	-4	-4	-4
CN(C)CCOC(=O)COC1=CC=C(Cl)C=C1	1		1	-4	-4.20501	-4
NS(=O)(=O)C1=C(Cl)C=C2NC(NS(=O)(=O)C2=C1)C3CC4CC3C=C4	1	4	3	-4.86003	-4.56003	-4.96003
FC1=CC=C(C=C1)C(OCCN2CCN(CCCC3=CC=CC=C3)CC2)C4=CC=C(F)C=C4	1	1	1	-5.01003	-5.96003	-4.51003
CC(CCC1=CC=C(O)C=C1)NCCC2=CC(O)=C(O)C=C2	1	1	1	-4	-4.86003	-5.91003
CN(C)CCOC(C1=CC=CC=C1)C2=CC=CC=C2	4	1	4	-4	-5.36003	-4
CNCCCN1C2=C(CCC3=C1C=CC=C3)C=CC=C2	4	1	3	-4	-5.44065	-4.59065
OC1=NC(=O)C(N1)(C2=CC=CC=C2)C3=CC=CC=C3	4	4	4	-4.86003	-4	-4
OC1=C(O)C2=C(C=CC(=O)O2)C=C1	4		1	-4.97127	-4	-4
CC(C)N(CCC(C(N)=O)(C1=CC=CC=C1)C2=NC=CC=C2)C(C)C	4	4	2	-4	-4	-4.66003
OC(=O)CN(CCN(CC(O)=O)CC(O)=O)CCN(CC(O)=O)CC(O)=O	4	4	4	-4	-4	-4
CCCCCCCCCCCCCCC[C@H](O)[C@@H](N)CO	4	1	4	-4	-5.01003	-4
OC1=CC=C(C=C1)C2=COC3=C(C=CC(O)=C3)C2=O	4	4	4	-6.67127	-4	-4.72127
CCN(CC)CCOC(=O)C1(CCCCC1)C2CCCCC2	1	1	1	-5.26003	-5.61003	-6.06003
NC(CC1=CC(O)=C(O)C=C1)C(O)=O	1			-4	-4	-5.52127
OCCN(CCO)C1=NC2=C(N=C(N=C2C(=N1)N3CCCCC3)N(CCO)CCO)N4CCCCC4	4	3	1	-5.61003	-5.31003	-5.06003
NC1=NC(N)=NC(O)=C1	4			-4	-4	-4
CCN(CC)C(=O)C1=CC(OC)=C(O)C=C1	4	4	4	-4	-4	-4
CCC1=CC=CC2=C1NC3=C2CCOC3(CC)CC(O)=O	3	4	4	-4.74065	-4.18001	-4
CSC1=CC=C(C=C1)C(=O)C2=C(C)NC(=O)N2	4	4	4	-4	-4.56003	-4
CCOC(=O)C1=CN=C2N(CC)N=CC2=C1NN=C(C)C	1	2	2	-4.86003	-4	-4.96003
CN[C@@H](C)[C@H](O)C1=CC=CC=C1	1	2	4	-4	-4	-4
CCC1(CC2=C(O1)C=CC=C2)C3=NCCN3	4	1	4	-4	-4.86003	-4
CCC1(C)CC(=O)NC1=O	1		4	-4	-4	-4
FC1=CC=C(C=C1)C(CCCN2CCC3(CC2)N(CNC3=O)C4=CC=CC=C4)C5=CC=C(F)C=C5	3	1	1	-4.91003	-6.36003	-4
CN1C(=O)N(CC2=CC=CO2)C3=C(NC(C)=N3)C1=O	4	4	4	-4	-4.81003	-4
CNCCC(OC1=CC=C(C=C1)C(F)(F)F)C2=CC=CC=C2	3	1	2	-4.41003	-5.91003	-5.11003
NC(=O)OCC(COC(N)=O)C1=CC=CC=C1	1		1	-4	-4	-4
CC(CC1=CC=C(O)C=C1)NCC(O)C2=CC(O)=CC(O)=C2	4	1	2	-4	-4.96003	-4
OCCN1CCN(CCCN2C3=CC(=CC=C3SC4=C2C=CC=C4)C(F)(F)F)CC1	1	1	1	-4	-7.01003	-5.11003
CC(C)OC(=O)C(C)(C)OC1=CC=C(C=C1)C(=O)C2=CC=C(Cl)C=C2	1	1	1	-5.61003	-4	-4
O=C1NCC2(CCN(CCC3=CC=CC=C3)CC2)O1	4	4	3	-4	-4.81003	-4
CCOC(=O)C1=C2CN(C)C(=O)C3=C(C=CC(F)=C3)N2C=N1	4	4	4	-4.43563	-4	-4
CCCCC1=CC=C(N=C1)C(O)=O	4	4	4	-4	-4	-4
FC1=CNC(=O)NC1=O		4	4	-4	-4	-4
FC(F)(F)COC1=CC=C(OCC(F)(F)F)C(=C1)C(=O)NCC2CCCCN2	4	1	4	-4	-5.21003	-4.61003
OC1=CC=C(C=C1)C2CNCCC3=C(Cl)C(O)=C(O)C=C23	4		4	-4	-4.96003	-4
CCOC(=O)NC1=CC=C(NCC2=CC=C(F)C=C2)N=C1N	4	4	4	-4.81003	-5.51003	-5.76003
CC(C)C(=O)NC1=CC=C(C(=C1)C(F)(F)F)[N+]([O-])=O	4		1	-4.56003	-4.56003	-4
CC(C)(C(O)=O)C1=CC=C(C=C1)C(O)CCCN2CCC(CC2)C(O)(C3=CC=CC=C3)C4=CC=CC=C4	4	4	4	-4	-4	-4
CCOC(=O)C1=C(C)NC(C)=C(C1C2=C(Cl)C(Cl)=CC=C2)C(=O)OC	1	4		-5.66003	-4.61003	-5.36003
CC1=NC=C(N=C1)C(=O)NCCC2=CC=C(C=C2)S(=O)(=O)NC(=O)NC3CCCCC3	2	4	4	-4.86003	-4	-4
CC1=NN=C(C2=CC=C(N)C=C2)C3=CC4=C(OCO4)C=C3C1	3	4	4	-5.12127	-4.72127	-5.47127
NCC1(CC(O)=O)CCCCC1	4	4	1	-4	-4	-4
COC1=C(C=C(Cl)C=C1)C(=O)NCCC2=CC=C(C=C2)[S+]([O-])(=O)NC(=O)NC3CCCCC3	1	4	1	-5.05315	-4.55315	-5.42815
NC(=N)NC(=O)CC1=C(Cl)C=CC=C1Cl	4	3	4	-4	-4.66003	-4.76003
NC1=NC2=C(N=CN2COC(CO)CO)C(=O)N1	4	2	4	-4	-4	-4
OC1=CC=C(C=C1)C2=COC3=C(C(O)=CC(O)=C3)C2=O	3	4	4	-4	-4.71003	-4.96003
CC[N+](CC)(CC)CCOC1=CC=CC(OCC[N+](CC)(CC)CC)=C1OCC[N+](CC)(CC)CC		4		-4	-4	-4
OC1(CCN(CCCC(=O)C2=CC=C(F)C=C2)CC1)C3=CC=C(Cl)C=C3	3	4	1	-4	-5.36003	-4
NC1=C2C(O)CCCC2=NC3=CC=CC=C13	4	4	3	-4	-4.81003	-4
NS(=O)(=O)C1=C(Cl)C=C2NCNS(=O)(=O)C2=C1			4	-4	-4	-4
NCCC1=CNC=N1	1		1	-4	-4	-4
OC1=CC=C(O)C=C1	4	4	4	-4	-4.36003	-5.36003
CC(C)CC1=CC=C(C=C1)C(C)C(O)=O	4		4	-4	-4	-4
CC(C)C(=O)C1=C2C=CC=CN2N=C1C(C)C	1	2	3	-4	-4	-4
CC(C)NCC(O)C1=CC(O)=C(O)C=C1	1	1		-4	-4.41003	-6.71003
C1CN=C(N1)C2COC3=C(O2)C=CC=C3	3	1	4	-4	-4.71003	-4
COC1=CC2=C(C=C1)N(C(=O)C3=CC=C(Cl)C=C3)C(C)=C2CC(O)=O	3	4	1	-4.96003	-4	-4.71003
CN(C)CCCN1C2=C(CCC3=C1C=CC=C3)C=CC=C2	4	1	4	-4	-5.16003	-4
CC(C)NNC(=O)C1=CC=NC=C1	4	4	1	-4	-4	-4
CCN1C=CN=C1CC2COC3=C(O2)C=CC=C3	4	1	4	-4	-5.76003	-4
CC(C(O)=O)C1=CC=CC(=C1)C(=O)C2=CC=CC=C2	4	4	4	-4.71003	-4.81003	-5.26003
CN1CCC(CC1)=C2C3=C(SC=C3)C(=O)CC4=C2C=CC=C4	4	3	4	-4	-5.86003	-4
O=C1N(C2=C(C=CC=C2)C1(CC3=CC=NC=C3)CC4=CC=NC=C4)C5=CC=CC=C5		4	1	-5.66003	-4	-6.26003
CCN1C=C(C(O)=O)C(=O)C2=C1C(F)=C(N3CCNC(C)C3)C(F)=C2	4	4	2	-4	-4	-4
NC1=NC(N)=C(N=N1)C2=CC=CC(Cl)=C2Cl	4	4	4	-4	-4.41003	-4
CN(C)C(=O)C(CCN1CCC(O)(CC1)C2=CC=C(Cl)C=C2)(C3=CC=CC=C3)C4=CC=CC=C4	3	2	1	-4.84065	-5.31565	-4
OC(=O)C1=NN(CC2=C(Cl)C=C(Cl)C=C2)C3=C1C=CC=C3	4	4	3	-4	-4	-4.41003
CC1=C(C=NO1)C(=O)NC2=CC=C(C=C2)C(F)(F)F	2	2	2	-4.86003	-4.61003	-5.46003
CCN(CC)CC(=O)NC1=C(C)C=CC=C1C	4	1	4	-4	-4	-4
CC1=C(C[S+]([O-])C2=NC3=C(N2)C=CC=C3)N=CC=C1OCC(F)(F)F	4		4	-4.84065	-6.19065	-5.04065
CCOC(=O)N1CCC(CC1)=C2C3=CC=C(Cl)C=C3CCC4=C2N=CC=C4	2	1	1	-6.96003	-5.21003	-4
CCCN(CCC)C(=O)C(CCC(O)=O)NC(=O)C1=CC=CC=C1	4	4	4	-4	-4	-4
CCN(CC)CCNC(=O)C1=CC(Cl)=C(N)C=C1OC	4	1	1	-4	-4.81003	-4
COC(=O)NC1=NC2=C(N1)C=CC(=C2)C(=O)C3=CC=CS3	2	4	4	-4	-4	-4
COC1=C(NC2=NCCN2)C(Cl)=NC(C)=N1	4	1	4	-4	-4	-4
CC(C)NCC(O)C1=CC(O)=CC(O)=C1	4	4	4	-4	-4.91003	-4.86003
CN1CCN2C(C1)C3=C(CC4=C2C=CC=C4)C=CC=C3	1	1	1	-4	-5.56003	-4.51003
CC(N)COC1=C(C)C=CC=C1C	4	1	4	-4	-4.76565	-4
CCOC(=O)[N-]C1=C[N+](=NO1)N2CCOCC2	4	4	2	-4	-4	-4
CN(CCCOC1=C(Cl)C=C(Cl)C=C1)CC#C	1	1	1	-4.51003	-5.81003	-4.61003
OC1=CC(O)=C(C=C1)C2=C(O)C(=O)C3=C(O2)C=C(O)C=C3O	3	4	4	-4.62127	-4	-4
NC1=NC(=CC(N)=[N+]1[O-])N2CCCCC2	4	4	3	-4	-5.11003	-4
CC(C)C1=CC(OC(C)=O)=C(C)C=C1OCCN(C)C	1	1	1	-4	-5.06003	-4
COC1=CC2=C(NC=C2CCNC(C)=O)C=C1	4	4	4	-4	-4	-4
COC1=CC(=CC(OC)=C1OC)C(CCCN(C)CCC2=CC(OC)=C(OC)C=C2)(C#N)C(C)C	4	4	1	-4	-4	-6.31003
COC1=CC(C(O)C(C)N)=C(OC)C=C1	4	1	4	-4	-4	-4
CNC1(C)C2CCC(C2)C1(C)C	4		4	-4	-4	-4
CN(C)CCN(CC1=CC=CS1)C2=NC=CC=C2	4	1	2	-4	-6.21003	-4
CC12CC3CC(C)(C1)CC(N)(C3)C2	4	4	4	-4	-4	-4
CNCCCC12CCC(C3=C1C=CC=C3)C4=C2C=CC=C4	4	1		-4	-5.74065	-5.96565
CCOC(=O)C1=C(C)NC(C)=C(C1C2=CC=CC(=C2)[N+]([O-])=O)C(=O)OC	1		1	-6.36003	-4.86003	-5.11003
COCCOC(=O)C1=C(C)NC(C)=C(C1C2=CC(=CC=C2)[N+]([O-])=O)C(=O)OC(C)C	1	3	1	-6.26003	-4.86003	-5.91003
CNCCC(OC1=C(OC)C=CC=C1)C2=CC=CC=C2	4	1	2	-4	-5.76003	-4.61003
CC(CCC1=CC=CC=C1)NC(C)C(O)C2=CC=C(O)C=C2	4	1	2	-4	-6.71003	-4
COC1=C(C=CC=C1)N2CCN(CC(O)COC3=C4C=CC=CC4=CC=C3)CC2	1	1	1	-5.76003	-6.36003	-4
OC(=O)C1=C(NC2=CC(=CC=C2)C(F)(F)F)N=CC=C1	3	4	4	-4.46003	-4	-4.86003
C[S+]([O-])(=O)NC1=C(OC2=CC=CC=C2)C=C(C=C1)[N+]([O-])=O	4	4	3
O=C(CCNNC(=O)C1=CC=NC=C1)NCC2=CC=CC=C2	3	2	4	-5.26003	-4.81003	-4.96003
CN1CC(C2=CC=CC=C2)C3=CC=CC(N)=C3C1	4	1	3	-4	-5.11003	-4.41003
COC(=O)C1=C(C)NC(C)=C(C1C2=CC(=CC=C2)[N+]([O-])=O)C(=O)OCCN(C)CC3=CC=CC=C3	2	1	1	-6.61003	-5.56003	-6.96003
CC1(C)NC(=O)N(C1=O)C2=CC(=C(C=C2)[N+]([O-])=O)C(F)(F)F	4	4	3	-5.16565	-4	-4.64065
CC1=NC(N)=C(CNC(=O)N(CCCl)N=O)C=N1	1	1	1	-4	-5.01003	-5.71003
CN1CCN(CC1)C2CC3=C(SC4=C2C=C(Cl)C=C4)C=CC=C3	1	1	1	-4.53563	-6.91565	-4.96565
CC1=CC(=C(O)C(C)=C1CC2=NCCN2)C(C)(C)C	4	1	4	-4	-5.71003	-4
CCN(CC)CC#CCOC(=O)C(O)(C1CCCCC1)C2=CC=CC=C2		1	1	-5.12127	-5.52127	-5.57127
CN(C)CCOC(C1=CC=CC=C1)C2=C(C)C=CC=C2	4	1	3	-4	-5.01003	-4
CC1COC2=C(N3CCN(C)CC3)C(F)=CC4=C2N1C=C(C(O)=O)C4=O	4	4	4	-4	-4	-4
O=C1NC2=C(C=CC=C2)N1CCCN3CCN(CC3)C(C4=CC=CC=C4)C5=CC=CC=C5	1	1	1	-4.56003	-7.26003	-4
CC1=C(CCN2CCC(CC2)C(=O)C3=CC=C(F)C=C3)C(=O)N4C=CC=CC4=N1	4	1	2	-4	-5.66003	-4.76003
CC(C)NCC(O)COC1=CC=CC2=C1C=CN2	4	1	4	-4	-4.51003	-4
CCCCCCCCCCCCCCCC(=O)NCCO	2	1	4	-4	-4.76003	-4.81003
CC(C)NCC(O)COC1=C2C=CC=CC2=CC=C1	4	1	4
CCCC(C(=O)OCCN(CC)CC)(C1=CC=CC=C1)C2=CC=CC=C2	1	1	1	-5.21003	-7.46003	-6.66003
CN1C=NC2=C1C(=O)N(CCCCC(C)=O)C(=O)N2C	4	4	4	-4	-4	-4
FC1=CC=C(C=C1)C(CCCN2CCC(CC2)N3C(=O)NC4=C3C=CC=C4)C5=CC=C(F)C=C5	4	1	1	-4.51003	-5.71003	-4
CC1=CN(C(=O)C=C1)C2=CC=CC=C2	4	4	4	-4	-4	-4
COC1=CC2=CC=NC(CC3=CC(OC)=C(OC)C=C3)=C2C=C1OC	4	4	1	-5.01003	-5.31003	-6.06003
CC(CN1C2=C(SC3=C1C=CC=C3)C=CC=C2)N(C)C	4	1	4	-4	-5.61003	-4.96003
O=C(C1CCCCC1)N2CC3N(CCC4=C3C=CC=C4)C(=O)C2	2	4	4	-4	-4.46003	-4.71003
CCCNCC(O)COC1=C(C=CC=C1)C(=O)CCC2=CC=CC=C2	4	1	1	-4	-7.01003	-5.61003
NC(=O)CN1CCCC1=O			4	-4	-4	-4
COC1=CC=C(CN(CCN(C)C)C2=NC=CC=C2)C=C1	4	1	4	-4	-6.69065	-4
CN1C(C(=O)NC2=CC=CC=N2)=C(O)C3=C(C=CC=C3)[S+]1([O-])=O	4	4	3	-4.97127	-4	-4
OCCN1CCN(CCCN2C3=C(SC4=C2C=C(Cl)C=C4)C=CC=C3)CC1	4	1	1	-4	-7.56004	-4.81003
CN(C)CCCN1C2=C(SC3=C1C=CC=C3)C=CC=C2	4	1	4	-4	-7.21003	-4
NNCCC1=CC=CC=C1	4		4	-4.71003	-5.26003	-4.71003
C[NH+](C)CCC(C1=CC=CC=C1)C2=CC=CC=[NH+]2	4		4
NC(=O)C1=CN=CC=N1		1	4	-4	-4	-4
CCC1(C(=O)NCNC1=O)C2=CC=CC=C2	4	4	3	-4	-4	-4
CCC(=O)C1=CC=C2SC3=C(C=CC=C3)N(CCCN(C)C)C2=C1	2	1	2	-4	-6.31003	-4
CN(CC#C)CC1=CC=CC=C1	2	1	3	-4	-4	-4
CCCCC1C(=O)N(N(C1=O)C2=CC=CC=C2)C3=CC=CC=C3	4	4	4	-5.06003	-4	-4.66003
CNCCCC1C2=C(C=CC=C2)C=CC3=C1C=CC=C3	1	1	3	-4	-5.51003	-4.51003
CN1CCN(CCCN2C3=C(SC4=C2C=C(Cl)C=C4)C=CC=C3)CC1	2	1	1	-4	-6.81003	-4.81003
C(N1CCN(CC1)C2=NC=CC=N2)C3=CC=C4OCOC4=C3	4	1	2	-4.96003	-6.06003	-5.06003
CCN(CC)CCNC(=O)C1=CC=C(N)C=C1	4	3	4	-4	-4	-4
CCCNC(C)C(=O)NC1=C(C)C=CC=C1	2	2	3	-4	-4.46565	-4
CCCN1C=NC2=C1C(=O)N(CCCCC(C)=O)C(=O)N2C	4	4	4	-4	-4	-4
CCN(CC)CCOC(=O)C1=CC=C(N)C=C1	4	2	4	-4	-4.56003	-4
OC1=CC2=C(C(O)=C1)C(=O)C(O)=C(O2)C3=CC(O)=C(O)C=C3	1	1	1	-4.86003	-4.41003	-4.56003
C1CN(CCN1)C2=NC3=CC=CC=C3C=C2	4	1	2	-4	-4	-4
CCN(CC)CCCC(C)NC1=C2C=C(OC)C=CC2=NC3=C1C=CC(Cl)=C3	4	1	3	-4	-7.11003	-5.66003
CN\C(NCCSCC1=CC=C(CN(C)C)O1)=C/[N+]([O-])=O	4	4	3	-4	-4.81003	-4.96003
CC1=C(CCN2CCC(CC2)=C(C3=CC=C(F)C=C3)C4=CC=C(F)C=C4)C(=O)N5C=CSC5=N1	2	1	1	-4.61003	-5.51003	-4.36003
NC1=NC2=C(S1)C=C(OC(F)(F)F)C=C2	3	4	4	-4.41003	-4	-4
CC1=C(CCN2CCC(CC2)C3=NOC4=C3C=CC(F)=C4)C(=O)N5CCCCC5=N1	4	1	3	-4	-5.56003	-4
C1CC1C(NC2=NCCO2)C3CC3	4	3	4	-4	-4.56003	-4
OC1=CC=C(C=C1)C2=C(C(=O)C3=CC=C(OCCN4CCCCC4)C=C3)C5=C(S2)C=C(O)C=C5	4	1	1	-5.81003	-5.16003	-5.56003
CCCN(CCC)CCC1=C2CC(=O)NC2=CC=C1	4	4	4	-4	-5.56003	-4
COC1=C(OCC(O)CN2CCN(CC(=O)NC3=C(C)C=CC=C3C)CC2)C=CC=C1	4	1	1	-4	-4.91003	-4
COC1=C(OC2CCCC2)C=C(C=C1)C3CNC(=O)C3	4	4	3	-4	-4	-4.56003
COC1=C(C=CC=C1)N2CCNCC2	1	1	4	-4	-4	-4
O=C1NCN(C2=CC=CC=C2)C13CCN(CC4COC5=C(O4)C=CC=C5)CC3	1	1	1	-5.21003	-7.61004	-5.56003
CN1C=CC2=CC3=C(CCN3C(=O)NC4=CC=CN=C4)C=C12	4	3	4	-4	-4	-4
CNCC(O)C1=CC=C(O)C=C1	4			-4	-4	-4
CC1=C(CC(O)=O)C2=C(C=CC(F)=C2)\C1=C/C3=CC=C(C=C3)S(C)(=O)=O	4	4		-4.46003	-4	-4.86003
NC1CCN(CC1)C2=NC(Cl)=CC=C2	4	1	2	-4	-5.81003	-4
OCC1=C(O)C=CC(=C1)C(O)CNCCCCCCOCCCCC2=CC=CC=C2	3	1	1	-4	-5.66003	-5.31003
CN\C(NC#N)=N/C1=CC=C(C=C1)C2=NNC(=O)CC2C	4	4	1	-4	-4	-4
CC(C)(C)NCC(O)C1=CC(CO)=C(O)C=C1	4	4	4	-4	-4	-4
C(CNC1=NC2=C(S1)C=CC=C2)COC3=CC=CC(CN4CCCCC4)=C3	2	1	1	-4	-5.76003	-5.06003
FC1=CC=C(C=C1)C(=O)CCCN2CCC3(CC2)N(CNC3=O)C4=CC=CC=C4	1	1	3	-4	-6.51003	-4.66003
CCN1CCCC1CNC(=O)C2=C(OC)C=CC(=C2)[S+](N)([O-])=O	1	4	4
CC1=C(CC(O)=O)C2=C(C=CC(F)=C2)\C1=C/C3=CC=C(C=C3)S(C)=O	4	4	4	-4.56003	-4	-4.41003
OC1(CCN(CCCC(=O)C2=CC=C(F)C=C2)CC1)C3=CC=CC(=C3)C(F)(F)F	3	3	1	-4	-6.79065	-4
CCCCNC1=C(C(=O)OCC)C(C)=NC2=C1C=NN2CC	1	1	1	-4.76003	-4.51003	-5.61003
CN1CCN(CC(=O)N2C3=C(C)SC=C3C(=O)NC4=C2C=CC=C4)CC1	4	4	3	-4	-4	-4
O=C1N(C2CCC(=O)NC2=O)C(=O)C3=C1C=CC=C3	4	4	2	-4	-4.81003	-9.01011
CCN(CC)CCNC(=O)C1=CC(=CC=C1OC)S(C)(=O)=O	3	2	4	-4	-4.46003	-4
NCC[S+](O)([O-])=O	1
CCCCNC(=O)N[S+]([O-])(=O)C1=CC=C(C)C=C1	3	4	4	-4.41063	-4	-4
CCN(CC)C(=S)SSC(=S)N(CC)CC		2	3	-5.11268	-4	-5.10268
OC(CCN1CCCCC1)(C2CCCCC2)C3=CC=CC=C3	1	1	3	-4	-5.76003	-4
CC1=CC=C(C=C1)[S+]([O-])(=O)NC(=O)NN2CCCCCC2	4	4	4	-4.79065	-4.50501	-4.86565
CC(C)(C)NCC(O)C1=CC(O)=CC(O)=C1	4	4	4	-4	-4	-4
NCCC1=CC=C(O)C=C1			4	-4	-4.86003	-4.56003
CN(C)CCCN1C2=CC(=CC=C2SC3=C1C=CC=C3)C(F)(F)F	1	1	2	-4	-7.01003	-4
CC(CN(C)C)CN1C2=C(CCC3=C1C=CC=C3)C=CC=C2	1	1	2	-4	-5.54065	-5.26565
NC1=NC(N)=C2N=C(C3=CC=CC=C3)C(N)=NC2=N1	4	1	4	-4	-4.41003	-4
COC1=CC2=NC=NC(NC3=CC=CC(Cl)=C3)=C2C=C1OC	3	1	1	-5.07127	-4.77127	-5.02127
C1CN=C(N1)C2CCCC3=C2C=CC=C3		1	3	-4	-5.31003	-4
CN1C=NC2=C1C(=O)NC(=O)N2C	4	3	4	-4	-4	-4
COC1=CC2=NC(=NC(N)=C2C=C1OC)N3CCN(CC3)C(=O)C4CCCO4	4	4	4	-4	-4.56003	-4
OC(=O)CCCCC1CCSS1	4	4	4	-4	-4	-4
CC(C)(C)NCC(O)C1=C(Cl)C=CC=C1	4	4	4	-4	-4.91003	-4
ClC1=CC(=CC=C1)N2CCN(CCCN3N=C4C=CC=CN4C3=O)CC2	4	1	1	-4	-4.91003	-4
OC1=C(O)C=C(C=C(C#N)C#N)C=C1	3	2	4	-4	-4.51003	-4.61003
FC(F)(F)C1=C(C=CC=C1)N2C=CN=C2	4	4	3	-4.86003	-5.46003	-5.81003
CCCCNC1=CC=C(C=C1)C(=O)OCCN(C)C	3	1	1	-4.61003	-4	-4
COC1=CC(CC2=C(N)N=C(N)N=C2)=CC(OC)=C1OC	4	4	4	-4	-4	-4
CN1[C@H]2CC[C@@H]1C[C@@H](C2)OC(=O)C3=CC(Cl)=CC(Cl)=C3	4	4	4	-4	-7.36003	-4
CSC1=CC2=C(SC3=C(C=CC=C3)N2CCC4CCCCN4C)C=C1	3	1	1	-4	-6.96003	-4.76003
CC(C)(C)C1=CC=C(C=C1)C(O)CCCN2CCC(CC2)C(O)(C3=CC=CC=C3)C4=CC=CC=C4	4	4	1	-4	-6.56003	-4
CCN(CC1=CC=NC=C1)C(=O)C(CO)C2=CC=CC=C2	4	4	1	-5.79065	-4	-4.99065
COC1=C(C=CC=C1)N2CCN(CCCNC3=CC(=O)N(C)C(=O)N3C)CC2	4	1	4	-4	-5.11003	-4
BrC1=C(NC2=NCCN2)C=CC3=NC=CN=C13	4	1	4	-4	-4.66003	-5.31003
CCCCCCCCC(=O)NCC1=CC(OC)=C(O)C=C1	1	1	1	-6.16003	-4.86003	-6.06003
CC1=CC=CC(C)=C1NC2=NCCCS2	4	2	2	-4	-4.81003	-4
CC1=CC(=CC(C)=C1CC2=NCCN2)C(C)(C)C	4	1	1	-4	-5.36003	-4
COC1=C(OC(F)F)C=CC(=C1)C2=NNC(=O)C=C2	4	4	4	-4.41003	-5.76003	-4
CCN(CC)CCOC(=O)C(C1=CC=CC=C1)C2=CC=CC=C2	2	1	1	-4.51003	-5.71003	-4
CCCC1=CC(=O)NC(=S)N1	4	4	4	-4	-4	-4
N[S+]([O-])(=O)C1=C(Cl)C=C(NCC2=CC=CO2)C(=C1)C(O)=O	3	3	4
CC(C)(C(=O)C1=CN=CC=C1)C2=CN=CC=C2	4	4	4	-4	-4	-5.11003
NNC(=O)C1=CC=NC=C1	4	4	4	-4	-4	-4.41003
CCCN(CCC)[S+]([O-])(=O)C1=CC=C(C=C1)C(O)=O	4	4	3
O=C1C(CCS(=O)C2=CC=CC=C2)C(=O)N(N1C3=CC=CC=C3)C4=CC=CC=C4	4	4	4	-5.51003	-4	-5.41003
CCC1=C(C(N)=NC(N)=N1)C2=CC=C(Cl)C=C2	4	4	4	-4	-4.91003	-4
CN(C)C1=C(C)N(C)N(C1=O)C2=CC=CC=C2			2	-4.41003	-4	-4.76003
CC1=CC(=O)C2=C(C=CC=C2)C1=O	2		3	-4.41003	-4.81003	-5.96003
CCC(=C)C(=O)C1=CC=C(OCC(O)=O)C(Cl)=C1Cl	1	1	1	-5.41003	-4	-4
CC1=C(O)C(CO)=C(CO)C=N1	4	4	4	-4	-4	-4
OC(=O)C1=CC=CN=C1	4		4	-4	-4	-4
C(C1=NCCN1)C2=CC=CC=C2	4	2	4	-4	-4.56003	-4.41003
CN1N(C(=O)C=C1C)C2=CC=CC=C2	4	4	4	-4	-4	-4
CC1=CC=CC(NC2=C(C=CC=C2)C(O)=O)=C1C	1	4	3	-4.56003	-4	-4
NC1=CC=C(C=C1)C(=O)NCC(O)=O	3	4	4	-4	-4	-4
NC1=NC2=C(O1)C=CC(Cl)=C2	4	4	4	-4	-4	-4
CCOC1=CC=C(NC(C)=O)C=C1	4	4	4	-4	-4	-4
C[N+]1(C)CCC(CC1)=C(C2=CC=CC=C2)C3=CC=CC=C3	4			-4	-4.86003	-4
NC1=CC=C(C=C1)S(N)(=O)=O			4	-4	-4	-4
OC1=C(CC2=C(O)C3=C(OC2=O)C=CC=C3)C(=O)OC4=C1C=CC=C4	1	4	2	-5.46003	-5.56003	-5.11003
NC1=CC=C(C=C1)[S+]([O-])(=O)NC2=NC=CC=N2	4	4	4	-4	-4	-4
CC(C)[N+](C)(CCC(C(N)=O)(C1=CC=CC=C1)C2=CC=CC=C2)C(C)C	4			-4.46003	-5.71003	-5.21003
NC1=CC=C(C=C1)S(=O)(=O)NC2=NC=CS2	4	2	2	-4	-4	-4
CC1=CC=C(C=C1)N(CC2=NCCN2)C3=CC=CC(O)=C3	4	1	2	-4	-6.51003	-4
CCC1(CC)C(=O)NC=CC1=O	4	4	2	-4	-4	-4
NC1=CC=C(C=C1)S(=O)(=O)C2=CC=C(N)C=C2	4	3	4	-4	-4	-4.36003
NC1=CC=C(C=C1)S(=O)(=O)NC2=NN=C(Cl)C=C2	4	4	4	-4.61003	-4	-4
COC1=NN=C(NS(=O)(=O)C2=CC=C(N)C=C2)C=C1	1	4	2	-4	-4	-4
COC1=C2OC(C)=CC(=O)C2=C(OC)C3=C1OC=C3	4	4	4	-4.96003	-4.81003	-5.01003
CN1N(C(=O)C(N)=C1C)C2=CC=CC=C2	4		4	-4	-4	-4
OC(=O)C1=C(C=CC=C1)C(=O)NC2=CC=C(C=C2)[S+]([O-])(=O)NC3=NC=CS3	4	4	4
CCCCOC1=CC(C(=O)NCCN(CC)CC)=C2C=CC=CC2=N1	4	1	2	-4	-5.06003	-4
NC1=CC(C(O)=O)=C(O)C=C1	4		4	-4	-4	-4
CC1=CC(=O)OC2=C1C=CC(O)=C2	4	4	2	-4	-4	-4
NS(=O)(=O)C1=C(Cl)C=C2N=C(CSCC3=CC=CC=C3)NS(=O)(=O)C2=C1	1	4	4	-5.26003	-4.86003	-4
CCOC(=O)C1=CC=C(N)C=C1	4	2	4	-4.56003	-4	-4
CCCCOC(=O)C1=CC=C(N)C=C1	3	2	4	-4.56003	-4.41003	-5.01003
CCCCOC(=O)C1=CC=C(O)C=C1	4	1	4	-4.61003	-4.66003	-4.76003
CC(=O)NC1=CC=C(O)C=C1	2		3	-4	-4	-4
CCCCNC1=CC=C(C=C1)C(=O)OCCOCCOCCOCCOCCOCCOCCOCCOCCOC	3	3	1	-5.16003	-4	-5.71003
OC(C1CCNCC1)(C2=CC=CC=C2)C3=CC=CC=C3	4	2	4	-4	-4.46003	-4
OC(=O)CCC(=O)NC1=CC=C(C=C1)S(=O)(=O)NC2=NC=CS2	4	4	4	-4.46003	-4	-4
N[S+]([O-])(=O)C1=CC(Cl)=C(Cl)C(=C1)[S+](N)([O-])=O	4	4	4	-4	-4	-4
OC1=C(C=C(C=C1)[As](O)(O)=O)[N+]([O-])=O			3	-4	-4	-4
CC(C)(C)CC(C)(C)C1=CC=C(OCCOCC[N+](C)(C)CC2=CC=CC=C2)C=C1	3		1	-4.41003	-5.41003	-4.41003
NC(=O)NC1=CC=C(C=C1)[As](O)(O)=O	4	1	4	-4	-4	-4
COC1=CC(NS(=O)(=O)C2=CC=C(N)C=C2)=NC(OC)=N1	4	4	4	-4	-4	-4
CN(C(=O)CN(CCO)CC(=O)N(C)C(C)(C)CC1=CC=CC=C1)C(C)(C)CC2=CC=CC=C2	1	1	1	-4.81003	-5.86003	-5.46003
CN1C(=O)OC(C)(C)C1=O			1	-4	-4	-4
CC1=NOC(NS(=O)(=O)C2=CC=C(N)C=C2)=C1C	4	4	4	-4	-4	-4
NC1=CC=C(C=C1)S(=O)(=O)NC(=O)C2=CC=CC=C2	2	4	1	-4.41003	-4	-4
CC1=NC(NS(=O)(=O)C2=CC=C(N)C=C2)=NC=C1	4	4	1	-4	-4	-4
OC1=C2N=CC=CC2=C(Cl)C=C1I	2	2	1	-4	-4	-4
COC1=CC(O)=C(C=C1)C(=O)C2=C(O)C=CC=C2	1	1	1	-4.46003	-4.41003	-4
COC1=CC(O)=C(C=C1)C(=O)C2=CC=CC=C2	2	3	4	-4.41003	-4	-4
CN1CCC(CC1)OC(C2=CC=CC=C2)C3=CC=CC=C3	4	1	4	-4	-5.21003	-4
CN(C)CCCOC1=NN(CC2=CC=CC=C2)C3=C1C=CC=C3	4	1	4	-4	-6.76003	-4.66003
NS(=O)(=O)C1=C(C=C2NCNS(=O)(=O)C2=C1)C(F)(F)F		4		-4	-6.01003	-4
CC1=NN=C(NS(=O)(=O)C2=CC=C(N)C=C2)S1	4	4	4	-4.76003	-4	-4
NC1=CC=C(C=C1)S(=O)(=O)NC2=NC=CC=C2	4	4	4	-4	-4	-4.86003
S1C=NC(=C1)c2nc3ccccc3n2	4	4	2	-4	-4.71565	-4.31063
CCCCN(CCCC)CCCOC(=O)C1=CC=C(N)C=C1	4	1	4	-4	-7.51003	-4
COC1=C2OC(=O)C=CC2=CC3=C1OC=C3		4	4	-5.41003	-5.36003	-4.71003
CN1CCN(CC1)C(C2=CC=CC=C2)C3=CC=CC=C3	1	1	2	-4	-5.31003	-4
CC(C)C1=C(O)C(O)=C(C=O)C2=C1C=C(C)C(=C2O)C3=C(O)C4=C(C=O)C(O)=C(O)C(C(C)C)=C4C=C3C	4			-4.41003	-4.46003	-4.86003
CNNCC1=CC=C(C=C1)C(=O)NC(C)C	1	1		-4	-4	-4
CC1=NC=C(N1CCO)[N+]([O-])=O	4	4	2	-4	-4	-4
OC1=CC=C(C=C1)[C@@H]2CC(=O)C3=C(O2)C=C(O)C=C3O	2	4	4	-5.27127	-4.42127	-5.02127
CN1C2=C(N(CCO)C=N2)C(=O)N(C)C1=O	4	1	4	-4	-4	-4
OC(=O)C1=C(NC2=CC=CC(=C2)C(F)(F)F)C=CC=C1	2	4	2	-4	-4	-4
CCC1=NC=CC(=C1)C(N)=S	4	3	2	-4	-4	-4
CCCCOC1=CC=C(C=C1)C(=O)CCN2CCCCC2	4	1	4	-4.56003	-5.31003	-4
FC1=CC=C(C=C1)C(=O)CCCN2CCC(=CC2)N3C(=O)NC4=C3C=CC=C4	1	1	1	-4	-6.61003	-4
CCCOC1=C(C=CC(N)=C1)C(=O)OCCN(CC)CC	4	1	4	-4	-5.47127	-4.77127
C(C1=NCCN1)C2=CC=C3C=CC=CC3=C2	4	1	4	-4	-4.81003	-4
CCCCCCCCCCCCCCCC[N+](C)(C)CCN(CC1=CC=C(OC)C=C1)C2=NC=CC=N2	2	2	3	-4.61003	-5.26003	-4.56003
COC1=CC(=CC(OC)=C1OC)C(=O)NCC2=CC=C(OCCN(C)C)C=C2	2	4	4	-4	-4	-4
COC1=CC=C(C=C1)C(Cl)=C(C2=CC=C(OC)C=C2)C3=CC=C(OC)C=C3		1		-5.26003	-4	-4
CC(=O)OC1=CC=C(C=C1)C(C2=CC=C(OC(C)=O)C=C2)C3=NC=CC=C3	1	1	1	-4.76003	-4.81003	-5.01003
COC1=C(OC)C2=C(C=C1)C=C3C4=C(CC[N+]3=C2)C=C5OCOC5=C4	3		4	-4	-5.81003	-5.36003
CC(C)NC(=N)NC(=N)NC1=CC=C(Cl)C=C1	4	3	1	-4	-5.51003	-4
CCCCOC1=CC=C(OCCCN2CCOCC2)C=C1	1	1	2	-4	-4.86003	-4
COC1=CN=C(NS(=O)(=O)C2=CC=C(N)C=C2)N=C1	4	4	4	-4	-4	-4
CC1(C)OC(=O)NC1=O	4	2		-4	-4	-4
NC(=N)NC(=N)NCCC1=CC=CC=C1	4	4	4	-4	-5.21003	-4
CCCNC(C)(C)COC(=O)C1=CC=CC=C1	4	1	4	-4	-6.31003	-4
CCOC1=CC2=CC=NC(CC3=CC(OCC)=C(OCC)C=C3)=C2C=C1OCC	1	1	1	-5.76003	-4.86003	-4
CC1=CC2=C(C=C1[S+](N)([O-])=O)[S+]([O-])(=O)CCC2	4	4	4	-4	-4	-4
CN(C)C(=N)NC(N)=N	4	3		-4	-4	-4
CC(C)C[C@H](NC(C)=O)C(O)=O	4	4	4	-4	-4	-4
CNC(C)(C)CC1=CC=CC=C1	4	1	1	-4	-4.66003	-4
COC1=CC(NS(=O)(=O)C2=CC=C(N)C=C2)=NC=N1	4	4	4	-4	-4	-4
FC1=CC=C(C=C1)C(=O)CCCN2CCN(CC2)C3=CC=CC=N3		1	1	-4.91003	-4.81003	-4
NC1=NC(=O)NC=C1F	1	3	4	-4	-4	-4
CC(C)\N=C1/C=C2N(C3=CC=C(Cl)C=C3)C4=C(C=CC=C4)N=C2C=C1NC5=CC=C(Cl)C=C5	3	2	1	-5.77127	-5.87127	-5.77127
FC1=CC=C(C=C1)C(=O)CCCN2CCC(CC2)N3C(=O)NC4=C3C=CC=C4	4	1	1	-4	-5.16003	-4
CN1N(C(=O)C(NC(=O)C2=CN=CC=C2)=C1C)C3=CC=CC=C3	4	4	4	-4	-4	-4
CN(C(=S)OC1=CC2=C(C=CC=C2)C=C1)C3=CC(C)=CC=C3	1	1		-4.96003	-4.56003	-5.06003
CCCCOC1=CC=C(CC(=O)NO)C=C1	4	4	4	-4.76003	-4.91003	-4
COC1=NC=NC(NS(=O)(=O)C2=CC=C(N)C=C2)=C1OC	4	4	4	-4	-4	-4
C(N(CC1=CC=CC=C1)C2=CC=CC=C2)C3=NCCN3		1	4	-4.36003	-5.76003	-4
CCCCC1=NC(OCCN(C)C)=C2C=CC=CC2=C1	1	1	1	-4	-5.66003	-4.86003
CCN(CC)CCNC1=C2C(=O)C3=C(SC2=C(CO)C=C1)C=CC=C3	4	1	2	-4	-5.36003	-4
NC(=N)NC(=N)N1CCOCC1	3	4	4	-4	-4	-4
OC(CCCN1CCCCC1)(C2=CC=CC=C2)C3=CC=CC=C3	2	1	3	-4.36003	-6.86003	-4.86003
CCN(CC)CCNC(=O)COC1=CC=C(OC)C=C1	1	1	4	-4	-4.86003	-4
CC1=CC=CC(C)=C1NC(=O)CN2CCN(CCCC(C3=CC=C(F)C=C3)C4=CC=C(F)C=C4)CC2	4	3	1	-4.71003	-5.56003	-4
CN(C)CCCN1C2=CC(=CC=C2SC3=C1C=CC=C3)C(C)=O	3	1	3	-4	-6.36003	-4
CC1=C(OC2=C(C=CC=C2C1=O)C(=O)OCCN3CCCCC3)C4=CC=CC=C4	1	1	1	-4	-5.41003	-5.36003
CN(C(=O)C(Cl)Cl)C1=CC=C(OC(=O)C2=CC=CO2)C=C1	1	1	1	-4.41003	-4	-4
CCOC(=O)NNC1=C2C=CC=CC2=CN=N1	4	3	4	-4	-4.36003	-4
CC(=O)C1=CC=C2SC3=C(C=CC=C3)N(CCCN4CCC(CCO)CC4)C2=C1	3	1	3	-4	-6.46003	-4
CC1=CC2=C(O1)C(C)=C3OC(=O)C=C(C)C3=C2	4	3	4	-4	-4	-5.61003
CCN(CC)CCNC(=O)C1=CC(Br)=C(N)C=C1OC	4	1	4	-4	-5.16003	-4
OC(=O)CC1=CC=C(C=C1)C2=CC=CC=C2	4			-4	-4	-4
COC1=C2OCOC2=CC3=C1CN(C)CC3	4	1		-4	-5.61003	-4
CCCCOC1=CC(=CC=C1N)C(=O)OCCN(CC)CC	4	1	3	-4	-5.36003	-4.66003
CN(C)CCN(CC1=CC=C(Cl)C=C1)C2=NC=CC=C2	2	1	1	-4	-7.16003	-4
CN1C(COC(N)=O)=NC=C1[N+]([O-])=O	3	4	1	-4	-4	-4
OC1(CCN(CCCC(=O)C2=CC=C(F)C=C2)CC1)C3=CC=C(Br)C=C3			1	-4	-5.56003	-4
COC1=C(OC)C(OC)=C(CN2CCNCC2)C=C1	4	3	3	-4	-4	-4
CN1CCC(CC1)=C2C3=C(SC4=C2C=CC=C4)C=CC=C3	2	1	2	-4	-5.86003	-4
CC1=C(Cl)C=CC=C1NC2=C(C=CC=C2)C(O)=O	1	4	2	-4.41003	-4	-4
CCCCC1=CC2=C(NC(NC(=O)OC)=N2)C=C1	2	4	4	-4	-5.36003	-4
CN1CCC[C@@H]1CCO[C@](C)(C2=CC=CC=C2)C3=CC=C(Cl)C=C3	2	1	1	-4.46003	-6.31003	-6.01003
CCN(CC)C1=CC(C)=NC2=NC=NN12	4	4		-4	-4	-4
CC(C)NC1=C(C)N(C)N(C1=O)C2=CC=CC=C2	4	2	1	-4	-4.46003	-4
COC1=CC(C)=NN1C2=NC(OC)=CC(C)=N2	1	4	2	-4	-4	-4
CCS(=O)(=O)CCN1C(C)=NC=C1[N+]([O-])=O	4	4	4	-4	-4	-4
COC1=CC(=CC(OC)=C1OC)C(=O)OCCCN2CCCN(CCCOC(=O)C3=CC(OC)=C(OC)C(OC)=C3)CC2	2	4	1	-5.76003	-4.56003	-5.66003
COC1=CC2=CC=C(C=C2C=C1)[C@H](C)C(O)=O	4	4	1	-4	-4	-4
CCOC(=O)N1C=CN(C)C1=S	3	2	3	-4	-4	-4
OCCNC(=O)CN1C=CN=C1[N+]([O-])=O	4	4	1	-4	-4	-4
NC1=C(CNC2CCC(O)CC2)C=C(Br)C=C1Br	4	3	1	-4	-5.92127	-4
COC1=C(C\C=C(/C)CCC(O)=O)C(O)=C2C(=O)OCC2=C1C	4	4	4	-4	-4	-4
CC1=C(C=CC(OCCOCC[N+](C)(C)CC2=CC=CC=C2)=C1)C(C)(C)CC(C)(C)C	2	2		-4.41003	-5.11003	-4.41003
CC1=CC(OCCCC(C)(C)C(O)=O)=C(C)C=C1	4	4	4	-4.56003	-4	-4
CC1=C(NCCN2CCOCC2)N=NC(=C1)C3=CC=CC=C3	2	1	4	-4	-5.31003	-5.01003
CC(C)(C)NC[C@H](O)COC1=NSN=C1N2CCOCC2	4	1	4	-4	-5.11003	-4
CCCCC1(COC(=O)CCC(O)=O)C(=O)N(N(C1=O)C2=CC=CC=C2)C3=CC=CC=C3	4	4	3	-4	-4	-4
CC(C)(C)NC[C@H](O)COC1=C2CCCC(=O)C2=CC=C1	3	1	4	-4	-4.56003	-4
OCCOCCOC(=O)C1=C(NC2=CC(=CC=C2)C(F)(F)F)C=CC=C1	1	2	1	-4.76003	-4.56003	-4.76003
COC(=O)NC1=NC2=C(N1)C=CC(=C2)C(=O)C3=CC=CC=C3	4	4	4	-4	-4	-4
CCOC(=O)NC1=CC=C2SC3=C(C=CC=C3)N(C(=O)CCN4CCOCC4)C2=C1	3	3	1	-4.51003	-4.66003	-5.61003
COC1=CC2=C(C=C1)C(C)(C)C(=O)N(CCC3=CC=C(C=C3)S(=O)(=O)NC(=O)NC4CCCCC4)C2=O	1	1	1	-4.86003	-4.36003	-5.16003
ClC1=CC=C(OCC(=O)N2CCN(CC3=CC4=C(OCO4)C=C3)CC2)C=C1	1	1	2	-4.91003	-6.36003	-6.06003
CN1C(C(=O)NC2=NOC(C)=C2)=C(O)C3=C(C=CC=C3)S1(=O)=O	4	4	3	-4	-4	-4
COC1=CC(OC)=C(C(=O)CCCN2CCCC2)C(OC)=C1	4	2	4	-4	-4.96003	-4
OC(=O)CCC(=O)C1=CC=C(C=C1)C2=CC=CC=C2	4	4	4	-4	-4.91003	-4.46003
CC(C)(OC1=CC=C(CCNC(=O)C2=CC=C(Cl)C=C2)C=C1)C(O)=O	4	4	4	-4.61003	-4	-4
COC1=CC2=C(C=C1)C=C(CCC(C)=O)C=C2	4	1	2	-4	-4.36003	-4.86003
COC(=O)NC1=NC2=C(N1)C=CC(SC3=CC=CC=C3)=C2	2	2	3	-4	-4	-4
CCN1C=C(C(O)=O)C(=O)C2=C1N=C(N=C2)N3CCNCC3	3	4	3	-4	-4	-4
COC1=CC2=C(C=C1)N(C(=O)C3=CC=C(Cl)C=C3)C(C)=C2CC(=O)OCC(O)=O	1	2	4	-4	-4	-4
ClC1=C(CN2CCC3=C(C2)C=CS3)C=CC=C1	1	1	1	-5.31003	-6.26003	-4.61003
NS(=O)(=O)C1=CC(=CC(N2CCCC2)=C1OC3=CC=CC=C3)C(O)=O	4	4	4	-4	-4	-4
CC(C)NC(=O)NS(=O)(=O)C1=C(NC2=CC=CC(C)=C2)C=CN=C1	1	4	4	-4.56003	-4	-5.81003
CN1C(C(=O)NC2=NC=CC=C2)=C(O)C3=C(C=CS3)S1(=O)=O	4	4	4	-4.91003	-4	-4
C[C@H](O)C(=O)NC1=C(I)C(C(=O)NC(CO)CO)=C(I)C(C(=O)NC(CO)CO)=C1I	1	2		-4	-4	-4
NC1=CC(=CNC1=O)C2=CC=NC=C2	4	4	4	-4.96003	-4.91003	-5.81003
CCC1=CC=CC(CC)=C1NC(=O)CN(CC(O)=O)CC(O)=O	4	4	4	-4	-4	-4
COC1=CC=C(CCN2CCC(CC2)NC3=NC4=C(C=CC=C4)N3CC5=CC=C(F)C=C5)C=C1	1	1		-4	-5.21003	-4.81003
CCN1C=C(C(O)=O)C(=O)C2=C1C=C(N3CCNCC3)C(F)=C2	4	4	4	-4	-4	-4
COC1=CC2=C(NC(=N2)S(=O)CC3=C(C)C(OC)=C(C)C=N3)C=C1	4	4	1	-4.56003	-4	-4.91003
CCN1C=C(C(O)=O)C(=O)C2=C1N=C(N3CCNCC3)C(F)=C2	4		4	-4	-4	-4
CN\C(NCCSCC1=CSC(CN(C)C)=N1)=C/[N+]([O-])=O	4	4	1
C[C@H]1[C@H](NC(=O)C(=N\OC(C)(C)C(O)=O)\C2=CSC(N)=N2)C(=O)N1S(O)(=O)=O	4	4	3	-4	-4	-4
COC1=CC(N)=C(Cl)C=C1C(=O)NC2CCN(CC3=CC=CC=C3)CC2	4	4	1	-4	-7.66003	-4.86003
CCCN1CCC[C@@H]2CC3=NNC=C3C[C@@H]12	4	4	3	-4	-4	-4
OC(=O)COC(=O)CC1=C(NC2=C(Cl)C=CC=C2Cl)C=CC=C1	1	3	4	-4.76003	-4	-4
OC(=O)C1=CN(C2CC2)C3=C(C=C(F)C(=C3)N4CCNCC4)C1=O	4	3	4	-4	-4	-4
CCC1=C(C)CN(C(=O)NCCC2=CC=C(C=C2)[S+]([O-])(=O)NC(=O)NC3CCC(C)CC3)C1=O	2	4	3
OC1=C(C2CCC(CC2)C3=CC=C(Cl)C=C3)C(=O)C4=C(C=CC=C4)C1=O			1
N#CC1=CC=C(C=C1)C(N2C=NC=N2)C3=CC=C(C=C3)C#N	4	3	4	-4.87127	-4	-4.72127
CCOC1=C(C=CC(CC(=O)N[C@@H](CC(C)C)C2=C(C=CC=C2)N3CCCCC3)=C1)C(O)=O	4	1	1	-4	-4	-5.02127
CCCOC1=C(N)C=C(C=C1)C(=O)OCCN(CC)CC	4	1	2	-4	-5.19065	-4
OC1=CC(=C(O)C=C1)[S+](O)([O-])=O	4	4	4	-4	-4	-4.72127
CN(C)[C@H]1[C@@H]2[C@@H](O)[C@@H]3C(=C)C4=C(Cl)C=CC(O)=C4C(=O)C3=C(O)[C@@]2(O)C(=O)C(C(N)=O)=C1O	4	4	4	-4	-4	-4
CO\N=C(/C(=O)N[C@H]1[C@H]2SCC(C[N+]3(C)CCCC3)=C(N2C1=O)C(O)=O)C4=CSC(N)=N4		3		-4	-4	-4
CCCCCCCCCCCC1=C(O)C(=O)C=C(O)C1=O	4		3	-4.52127	-4	-4
CN1C=C2C[C@@H]3[C@H](C[C@@H](CNC(=O)OCC4=CC=CC=C4)CN3C)C5=C2C1=CC=C5	2	1	1	-4	-7.21003	-4
CC[C@@H](CO)NC(=O)[C@H]1CN(C)[C@@H]2CC3=CNC4=C3C(=CC=C4)C2=C1	4	2	2	-4	-6.36003	-4.91003
CO[C@]12C[C@@H](COC(=O)C3=CC(Br)=CN=C3)CN(C)[C@@H]1CC4=CN(C)C5=CC=CC2=C45	3	1	1	-4	-7.81003	-5.41003
C\C(C=CC1=C(C)CCCC1(C)C)=C/C=C/C(C)=C/C(O)=O	2			-4.56003	-4	-4.71003
CN(C)[C@H]1[C@@H]2C[C@H]3C(C(=O)C4=C(C=CC=C4O)[C@@]3(C)O)=C(O)[C@]2(O)C(=O)C(C(N)=O)=C1O	3	2	4	-4.76003	-4.81003	-4.86003
CCC(C)(C)C(=O)O[C@H]1C[C@@H](C)C=C2C=C[C@H](C)[C@H](CC[C@@H]3C[C@@H](O)CC(=O)O3)[C@@H]12	2	4	1	-5.71003	-4.56003	-5.46003
OCC1=CC(=O)C(O)=CO1	4	4	4	-4	-4	-4
COC1=C(OC)C2=C(C=C1)[C@H](OC2=O)[C@@H]3N(C)CCC4=CC5=C(OCO5)C=C34	1	4	1
O[C@H]1CC2=C(O[C@@H]1C3=CC(O)=C(O)C=C3)C=C(O)C=C2O		1	1
OC1=CC=C(\C=C\C2=CC(O)=CC(O)=C2)C=C1		4	4	-5.01003	-4.81003	-5.31003
CN[C@@H]1[C@H](O)[C@H](NC)[C@H]2O[C@]3(O)[C@@H](O[C@H](C)CC3=O)O[C@@H]2[C@H]1O	4	4	1	-4	-4.71003	-4.41003
COC1=CC2=C(C=C1OC)[C@H]3[C@@H](CO2)OC4=C(C=CC5=C4C[C@@H](O5)C(C)=C)C3=O	1	2	1	-5.21003	-4	-5.26003
CCCN1C[C@H](CSC)C[C@H]2[C@H]1CC3=CNC4=C3C2=CC=C4	4	1	3	-4	-7.26003	-5.66003
CN1C[C@@H](C[C@H]2[C@H]1CC3=CNC4=C3C2=CC=C4)C(=O)N[C@]5(C)O[C@@]6(O)[C@@H]7CCCN7C(=O)[C@H](CC8=CC=CC=C8)N6C5=O	4	4	1	-5.96003	-5.21003	-5.51003
CCC(=O)C1=CC=C(O)C=C1	4	4	3	-4	-4	-4
OC1=C2N=CC=CC2=C(I)C=C1I	2	2	3	-4	-4	-4
CN1C2=C(N(CC(O)CO)C=N2)C(=O)N(C)C1=O	4	1	2	-4	-4	-4
O=S(=O)(N1CCCNCC1)C2=C3C=CN=CC3=CC=C2		1	4	-4	-6.06003	-4.56003
FC1=CC=C(C=C1)C(N2CCN(C\C=C\C3=CC=CC=C3)CC2)C4=CC=C(F)C=C4	1	1	1	-5.11003	-5.76003	-4
[O-]C(=O)CCCC1=CC=CC=C1	4		4	-4	-4.56003	-4.91003
CN1C2=C(NC=N2)C(=O)N(C)C1=O	3	3	2	-4	-4	-4
CC(O)CN1C=NC2=C1C(=O)N(C)C(=O)N2C	4	4	3	-4	-4	-4
CCCC1=C(OCCCCC2=NNN=N2)C=CC(C(C)=O)=C1O	2	4	3	-6.86003	-4.46003	-5.51003
CN(C)CCN(CC1=CC=CC=C1)C2=NC=CC=C2	4	1	4	-4	-6.76003	-4.61003
NC1=CC=C(\N=N\C2=CC=CC=C2)C(N)=N1	3	4	4	-4.86003	-4.76003	-4.86003
CC(C)OC1=CC2=C(C=C1)C(=O)C(=CO2)C3=CC=CC=C3	1		1	-4.76003	-4.53001	-4
CCN1CCN(CC1)C2=C(F)C=C3C(=O)C(=CN(C4CC4)C3=C2)C(O)=O	4	1	4	-4	-4	-4
C\C=C(C1=CC=C(O)C=C1)\C(=C\C)C2=CC=C(O)C=C2	2		1	-4.76003	-4.61003	-5.21003
COC1=C(OC)C=C2C(N)=NC(=NC2=C1)N3CCN(CC3)C(=O)C4COC5=C(O4)C=CC=C5	3	4	1	-4	-4	-4.76003
C[N+]12CCC(CC1)C(C2)OC(=O)C(O)(C3=CC=CC=C3)C4=CC=CC=C4	4		1	-4	-4.81003	-4
CC1CC2=C(C=CC=C2)N1NC(=O)C3=CC(=C(Cl)C=C3)S(N)(=O)=O	4	3	2	-4	-4	-4
CCN1C=C(C(O)=O)C(=O)C2=C1N=C(C)C=C2	2	4	4	-4	-4	-4
COC1=CC=C(\C=C\C(=O)NC2=CC=CC=C2C(O)=O)C=C1OC		3	4	-4.77127	-4	-4.57127
OC(CCN1CCCC1)(C2CCCCC2)C3=CC=CC=C3	4	1	4	-4	-5.56003	-4
C(\C=C\C1=CC=CC=C1)N2CCN(CC2)C(C3=CC=CC=C3)C4=CC=CC=C4	1	1	1	-5.16003	-5.66003	-4
COCCCC\C(C1=CC=C(C=C1)C(F)(F)F)=N/OCCN	3	1	3	-4.96003	-6.01003	-5.11003
NS(=O)(=O)C1=C(C=C2NC(CC3=CC=CC=C3)NS(=O)(=O)C2=C1)C(F)(F)F	3	4	4	-4	-4	-4
OC1=CC=C(C=C1)C2(OC(=O)C3=CC=CC=C23)C4=CC=C(O)C=C4	4	4	1	-4.41003	-4.41003	-5.51003
CC[N+]1(C)CCCC(C1)OC(=O)C(O)(C2=CC=CC=C2)C3=CC=CC=C3	4			-4	-5.56003	-4
CCOC(=O)C1=C[C@]2(CC)CCCN3CCC4=C([C@H]23)N1C5=C4C=CC=C5	1	1	1	-4.41003	-5.31003	-5.36003
CN1CCCN=C1COC(=O)C(O)(C2CCCCC2)C3=CC=CC=C3	4	2	4	-4	-5.91003	-5.36003
CC1CCC2=C3N1C=C(C(O)=O)C(=O)C3=CC(F)=C2	3	4	4	-4	-4	-4
CN(C)CCOC(=O)C(C1=CC=CC=C1)C2(O)CCCC2	4	1	3	-4	-4.36003	-4
CCCC(=O)NC1=CC(C(C)=O)=C(OCC(O)CNC(C)C)C=C1	4	4	4	-4	-4	-4
CC1=NN(C(=O)C1)C2=CC=CC=C2	4	4	4	-4.46003	-4.61003	-4.76003
CC(NCCC(C1=CC=CC=C1)C2=CC=CC=C2)C3=CC=CC=C3	1	1	1	-4.86003	-7.06003	-5.06003
OCC(O)CN1CCN(CC1)C2=CC=CC=C2	4	1		-4	-4	-4
NC(=N)N[S+]([O-])(=O)C1=CC=C(N)C=C1	4	4	4	-4	-4	-4
COP(=O)(OC)C(O)C(Cl)(Cl)Cl	4	4		-4	-4	-4
CCCOC1=CC2=C(NC(NC(=O)OC)=N2)C=C1	4	4	4	-4	-4	-4
CCC(NC(C)C)C(O)C1=CC=C(O)C(O)=C1	1		1	-4.82127	-4.57127	-6.67127
OC(=O)CCNC(=O)C1=CC=CC=C1	4	4	3	-4	-4	-4
CC(=O)NS(=O)(=O)C1=CC=C(N)C=C1	4	1	1	-4	-4	-4
CC1=CC(C)=NC(NS(=O)(=O)C2=CC=C(N)C=C2)=N1	4	4	4	-4	-4	-4
CN1C(C(=O)NC2=NC=C(C)S2)=C(O)C3=CC=CC=C3[S+]1([O-])=O	4	4	4	-4.48001	-4	-4.76565
CCOC1=CC2=C(C=C1)N=C(S2)S(N)(=O)=O	4	4	3	-4.61003	-4	-4
COC(=O)CCC(=O)CN	4	4	4	-4	-4	-4
C1=CN(C=N1)C(C2=CC=CC=C2)C3=CC=C(C=C3)C4=CC=CC=C4	1	1	3	-7.61004	-6.61003	-7.91002
COC1=C(OCC(O)COC(N)=O)C=CC=C1	4	4	4	-4	-4	-4
ClC1=CC=C(COC(CN2C=CN=C2)C3=C(Cl)C=C(Cl)C=C3)C=C1	1	4	1	-6.51003	-6.66003	-6.51003
C(C(C1CCCCC1)C2CCCCC2)C3CCCCN3	3	1	4	-4.46003	-6.86003	-4.66003
CCC(COC(=O)C1=CC(OC)=C(OC)C(OC)=C1)(N(C)C)C2=CC=CC=C2	1	1		-4.86003	-6.41003	-4.86003
CN1CCCN(CC1)C(C2=CC=CC=C2)C3=CC=C(Cl)C=C3	4	1	2	-4	-7.11003	-4.51003
CC(=O)OC1=CC=CC2=C1C(=O)C3=C(OC(C)=O)C=C(C=C3C2=O)C(O)=O	1	1	1	-4	-5.11003	-5.41003
CC1=NC=C(N1CC(O)CCl)[N+]([O-])=O	4	4	4	-4	-4	-4
CCN(CCCCOC(=O)C1=CC(OC)=C(OC)C=C1)C(C)CC2=CC=C(OC)C=C2	3	1	1	-4	-7.36003	-5.51003
CN1CCCCC1C(=O)NC2=C(C)C=CC=C2C	4	4	1	-4	-5.02127	-4.67127
CC[C@H](NC(C)C)[C@H](O)C1=C2C=CC(=O)NC2=C(O)C=C1	4	4	4	-4	-4.66003	-4.41003
ClC1=CC=C(COC(CN2C=CN=C2)C3=CC=C(Cl)C=C3Cl)C(Cl)=C1	1	3	1	-6.72127	-5.97127	-6.92126
CC(COC1=CC=CC=C1)NC(C)C(O)C2=CC=C(O)C=C2	4	1	4	-4.51003	-6.21003	-4.41003
CC1=CC(CN2CCN(CC2)C(C3=CC=CC=C3)C4=CC=C(Cl)C=C4)=CC=C1	1	2	1	-4.96003	-5.61003	-5.11003
CCCCCCCCNC(C)C(O)C1=CC=C(SC(C)C)C=C1	1	1	1	-4.30501	-5.46565	-4.33001
CCN(CCCC1=CC=CC=C1)CCCC2=CC=CC=C2	1	1	2	-4	-5.91003	-4
CC(=O)NC1=C(I)C(C(O)=O)=C(I)C(NC(C)=O)=C1I		2	4	-4	-4	-4
CCC(C(=O)OCCN(CC)CC)C1=CC=CC=C1	3	1	2	-4	-5.51003	-4
[O-]C(=O)CC1=C(NC2=C(Cl)C=CC=C2Cl)C=CC=C1		4		-4.61003	-4	-4
CN(C)CCOC1=C(CC2=CC=CC=C2)C=CC=C1	3	1	4	-4	-5.71003	-4
CN1CCN(CC1)C2=NC3=C(OC4=C2C=C(Cl)C=C4)C=CC=C3	2	1	1	-4	-5.41003	-4
FC1=CC=C(C=C1)C(=O)C2CCN(CCN3C(=O)NC4=C(C=CC=C4)C3=O)CC2	1	2	1	-4.91003	-5.36003	-4.51003
CN(C)CCOC(C)(C1=CC=CC=C1)C2=NC=CC=C2	4	1	2	-4	-4.46003	-4
COCCC1=CC=C(OCC(O)CNC(C)C)C=C1	4	1	4	-4	-4.81003	-4
OC(=O)C1=CC2=CC=CC=C2C(CC3=C(O)C(=CC4=CC=CC=C34)C(O)=O)=C1O	3
CC(=O)OCC(=O)[C@@]1(O)CC[C@H]2[C@@H]3CCC4=CC(=O)CC[C@]4(C)[C@H]3C(=O)C[C@]12C	2	1	1	-4.41003	-5.41003	-4
CC(=O)OCC(=O)[C@@]12OC3(CCCC3)O[C@@H]1C[C@H]4[C@@H]5CCC6=CC(=O)C=C[C@]6(C)[C@@]5(F)[C@@H](O)C[C@]24C	1	1	1	-4.87127	-4.77127	-4
NC(N)=NC1=NC(CSCC\C(N)=N/S(N)(=O)=O)=CS1	4	4		-4	-4.56003	-4.41003
C[C@]12CC[C@H]3[C@@H](CCC4=CC(=O)CC[C@]34C)[C@@H]1CC[C@]2(O)C(=O)CO	4	2	1	-4	-4	-4
CCCCCC(=O)O[C@@]1(CC[C@H]2[C@@H]3CCC4=CC(=O)CC[C@]4(C)[C@H]3CC[C@]12C)C(C)=O	1	4	1	-5.31003	-4.86003	-5.71003
C[C@]12CC[C@H]3[C@@H](CCC4=CC(OC(=O)C5=CC=CC=C5)=CC=C34)[C@@H]1CC[C@@H]2O	1	1	1	-4.47127	-4	-4
CC(=O)OCC(=O)[C@@]1(O)CCC2C3CCC4=CC(=O)CC[C@]4(C)C3[C@@H](O)C[C@]12C	3	2	2	-4.76003	-4	-4
CC1(C)O[C@@H]2C[C@H]3[C@@H]4C[C@H](F)C5=CC(=O)C=C[C@]5(C)[C@@]4(F)[C@@H](O)C[C@]3(C)[C@@]2(O1)C(=O)CO	4	4		-4	-4	-4.71003
C[C@]12CC[C@H]3[C@@H](CCC4=CC(=O)CC[C@]34C)[C@@H]1CC[C@@H]2C(=O)CO	4	3	1	-4	-4	-4
CCCC1O[C@@H]2C[C@H]3[C@@H]4CCC5=CC(=O)C=C[C@]5(C)[C@H]4[C@@H](O)C[C@]3(C)[C@@]2(O1)C(=O)CO	1	2	1	-4.82127	-4.62127	-5.17127
C[C@]12CC[C@H]3[C@@H](CCC4=CC(=O)CC[C@]34C)[C@@H]1CC[C@@]2(O)C#C	4	2	1	-4	-4	-5.01003
CCOC(=O)[C@H](CCC1=CC=CC=C1)N[C@@H](C)C(=O)N2CCC[C@H]2C(O)=O	4	4	1	-4	-4	-4
C[C@H]1C[C@H]2[C@@H]3CC[C@](O)(C(C)=O)[C@@]3(C)C[C@H](O)[C@]2(F)[C@@]4(C)C=CC(=O)C=C14	3	4	1	-5.36003	-4	-4
CC(C)(C)NCC(O)COC1=C2C[C@H](O)[C@H](O)CC2=CC=C1	1	4	4	-4	-4	-4
OC1=C2O[C@H]3C(=C)CC[C@@]4(O)[C@H]5CC(C=C1)=C2[C@@]34CCN5CC6CC6	4	4	4	-4	-5.56003	-4
C[C@@H]1C[C@H]2[C@@H]3C[C@H](F)C4=CC(=O)C=C[C@]4(C)[C@@]3(F)[C@@H](O)C[C@]2(C)[C@@]1(O)C(=O)CO	4	4	1	-4	-4	-4.21063
CC(=O)OCC(=O)[C@@]1(O)CC[C@H]2[C@@H]3CCC4=CC(=O)C=C[C@]4(C)[C@H]3[C@@H](O)C[C@]12C	2	2	1	-4	-4.36003	-4
COC1=CC(=CC(OC)=C1OC)[C@H]2[C@@H]3[C@H](COC3=O)[C@@H](O)C4=C2C=C5OCOC5=C4	4	4	3	-5.81003	-4	-6.06003
C[C@H]1C[C@H]2[C@@H]3C[C@H](F)C4=CC(=O)C=C[C@]4(C)[C@@]3(F)[C@@H](O)C[C@]2(C)[C@@]1(OC(C)=O)C(=O)COC(C)=O	2	4	1	-4.81003	-4	-4
CCCC(=O)O[C@@]1([C@@H](C)C[C@H]2[C@@H]3CCC4=CC(=O)C=C[C@]4(C)[C@@]3(F)C(=O)C[C@]12C)C(=O)CCl	1	4	3	-4.76003	-5.51003	-5.71003
CC(=O)OCC(=O)[C@H]1CC[C@H]2[C@@H]3CCC4=CC(=O)CC[C@]4(C)[C@H]3CC[C@]12C	1	1	1	-5.31003	-4	-4
CC(C)C[C@@H]1N2C(=O)[C@](NC(=O)[C@H]3CN(C)C4CC5=C(Br)NC6=CC=CC(=C56)C4=C3)(O[C@@]2(O)[C@@H]7CCCN7C1=O)C(C)C	2	2	1
CC(=O)OC[C@H]1O[C@H]([C@H](OC(C)=O)[C@@H]1OC(C)=O)N2N=CC(=O)NC2=O	1	1	3	-4	-5.11003	-4
CC(=O)OCC(=O)[C@@]12OC(C)(C)O[C@@H]1C[C@H]3[C@@H]4C[C@H](F)C5=CC(=O)C=C[C@]5(C)[C@@]4(F)[C@@H](O)C[C@]23C	3	1	4	-5.51003	-4	-4
C[C@@H]1C[C@H]2[C@@H]3C[C@H](F)C4=CC(=O)C=C[C@]4(C)[C@@]3(F)[C@@H](O)C[C@]2(C)[C@@]1(O)C(=O)COC(=O)C(C)(C)C	3	3	1	-5.02127	-4	-5.27127
C[C@]12C[C@H](O)[C@H]3[C@@H](CCC4=CC(=O)CC[C@]34C)[C@@H]1CC[C@@H]2C(=O)CO	4	4	2	-4.76003	-4	-4
NC1=NC(Cl)=NC2=C1N=CN2[C@H]3C[C@H](O)[C@@H](CO)O3	4	2	4	-4.57127	-4	-4
C[C@@H]1C[C@H]2[C@@H]3CCC4=CC(=O)C=C[C@]4(C)[C@@]3(F)[C@@H](O)C[C@]2(C)[C@@]1(O)C(=O)COC(C)=O	1	1	1	-4.51003	-4	-4.41003
CC(=O)O[C@@]1(CC[C@H]2[C@@H]3C=C(Cl)C4=CC(=O)CC[C@]4(C)[C@H]3CC[C@]12C)C(C)=O	3	3	1	-5.06003	-4	-4
C[N+]1(C)[C@H]2C[C@@H](C[C@@H]1[C@H]3O[C@@H]23)OC(=O)[C@H](CO)C4=CC=CC=C4	3			-4	-4	-4
C[C@H]1C[C@H]2[C@@H]3CC[C@](O)(C(=O)CO)[C@@]3(C)C[C@H](O)[C@@H]2[C@@]4(C)C=CC(=O)C=C14	4	4	1	-4.46003	-4	-4
C[C@]12C[C@H](O)[C@H]3[C@@H](CCC4=CC(=O)CC[C@]34C)[C@@H]1CC[C@]2(O)C(=O)CO	4	4	2	-4	-4	-4
CC1=NC2=C(C=C(Cl)C=C2)S(=O)(=O)N1	3	4	3	-4	-4	-4
C[C@H]1C[C@H]2[C@@H]3CC[C@](O)(C(C)=O)[C@@]3(C)CC[C@@H]2[C@@]4(C)CCC(=O)C=C14	4	4	1	-4.66003	-4	-4
CC(=O)[C@H]1CC[C@H]2[C@@H]3CC[C@H]4C[C@H](O)CC[C@]4(C)[C@H]3C(=O)C[C@]12C	1	4	1	-5.06003	-4	-4
CC1(C)O[C@@H]2C[C@H]3[C@@H]4CCC5=CC(=O)C=C[C@]5(C)[C@@]4(F)[C@@H](O)C[C@]3(C)[C@@]2(O1)C(=O)CO	1	2	1	-4	-4.81003	-4.51003
COC1=C(OC)C2=C(C=C1)[C@H](OC2=O)[C@@H]3N(C)CCC4=CC5=C(OCO5)C(OC)=C34	1	2	1	-6.96003	-5.31003	-6.36003
CC1(C)O[C@@H]2C[C@H]3[C@@H]4C[C@H](F)C5=CC(=O)CC[C@]5(C)[C@H]4[C@@H](O)C[C@]3(C)[C@@]2(O1)C(=O)CO	3	4	1	-4	-4	-4
CC[C@H]1[C@@H](CC2=CN=CN2C)COC1=O	4	4	4	-4	-4	-4
CCC(=O)O[C@@]1([C@@H](C)C[C@H]2[C@@H]3CCC4=CC(=O)C=C[C@]4(C)[C@@]3(F)[C@@H](O)C[C@]12C)C(=O)CCl	2	4	1	-4.76003	-4.96003	-4.81003
CC[C@H](C)C(=O)O[C@H]1C[C@@H](C)C=C2C=C[C@H](C)[C@H](CC[C@@H]3C[C@@H](O)CC(=O)O3)[C@@H]12	1	4	1	-4	-4.41003	-5.31003
C[C@]12CC[C@H]3[C@@H](CCC4=CC(O)=CC=C34)[C@@H]1CCC2=O	1	4	1	-5.39065	-4	-4
C[C@@H]1C[C@H]2[C@@H]3CCC4=CC(=O)C=C[C@]4(C)[C@@]3(F)[C@@H](O)C[C@]2(C)[C@H]1C(=O)CO	4	2	1	-4.96003	-4	-4
C[C@H](CS)C(=O)N1CCC[C@H]1C(O)=O	4	4	4	-4	-4	-4
OC[C@H]1O[C@H](C[C@@H]1O)N2C=C(F)C(=O)NC2=O	3	4	4	-4	-4	-4
C[C@]12CC[C@H]3[C@@H](CCC4=CC(=O)CC[C@]34C)[C@@H]1CCC2=O	4	4	1	-4	-4	-4
C[C@]12CC(=O)[C@H]3[C@@H](CCC4=CC(=O)CC[C@]34C)[C@@H]1CC[C@]2(O)C(=O)CO	4	1	3	-4	-4	-4
CC1=CN([C@H]2C[C@H](N=[N+]=[N-])[C@@H](CO)O2)C(=O)NC1=O	4	4	4	-4	-4	-4
CCCCC(=O)O[C@@]1(CC[C@H]2[C@@H]3CCC4=CC(=O)CC[C@]4(C)[C@H]3[C@@H](O)C[C@]12C)C(=O)CO	2	4	1	-4.61003	-4	-4.96003
C[C@H](CCC(O)=O)[C@H]1CC[C@H]2[C@H]3[C@H](CC(=O)[C@]12C)[C@@]4(C)CCC(=O)C[C@H]4CC3=O	4	4	4	-4	-4	-4
CC[C@@H](CO)NC(=O)[C@H]1CN(C)[C@@H]2CC3=CN(C)C4=CC=CC(=C34)C2=C1	4	1	4	-4.51003	-4.91003	-4.96003
CC(=O)O[C@@]1(CC[C@H]2[C@@H]3C=C(C)C4=CC(=O)CC[C@]4(C)[C@H]3CC[C@]12C)C(C)=O	2	4	1	-4.91003	-4	-4
COC1=CC=CC2=C1C(=O)C3=C(O)C4=C(C[C@](O)(C[C@@H]4O[C@H]5C[C@H](N)[C@H](O)[C@H](C)O5)C(C)=O)C(O)=C3C2=O	4	4	2	-4	-4.86003	-4.86003
CNC[C@H](O)C1=CC=CC(O)=C1	1	2	4	-4	-4	-4
COC1=CC=C(C=C1)[C@@H]2SC3=C(C=CC=C3)N(CCN(C)C)C(=O)[C@@H]2OC(C)=O	4	4	1	-4	-4.20501	-5.44065
CN1[C@H]2CC(C[C@@H]1[C@H]3O[C@@H]23)OC(=O)[C@H](CO)C4=CC=CC=C4	4	1	2
CC[C@H]1CN2CCC3=CC(OC)=C(OC)C=C3[C@@H]2C[C@@H]1C[C@H]4NCCC5=CC(OC)=C(OC)C=C45		1	2	-4	-4	-4
OC1=C2O[C@H]3C(=O)CC[C@@]4(O)[C@H]5CC(C=C1)=C2[C@@]34CCN5CC6CC6	4	4	4	-4	-5.01003	-4
CCCCN1C[C@H](O)[C@@H](O)[C@H](O)[C@H]1CO	4	4		-4	-4	-4
NC\C=C\C(O)=O		1		-4	-4	-4
CC(=C)[C@H]1CN[C@@H]([C@H]1CC(O)=O)C(O)=O	4	2	2	-4	-4	-4
CN1C(=O)COC2=C1C=C(Cl)C=C2C(=O)NC3CN4CCC3CC4	4	4	4	-4	-4	-4
O=C1CC2(CCCC2)CC(=O)N1CCNCC3COC4=C(O3)C=CC=C4	3	1	1	-4	-6.31003	-6.16003
CC(C)NCC(O)C1=CC(C#N)=C(N)C=C1	4	4	4	-4	-4	-4
CCN(CC)CCOCCOC(=O)C1(CCCC1)C2=CC=CC=C2	4	1	1	-4	-5.31003	-5.36003
CN(C)CCCSC1=C(NC(=O)\C=C\C2=CC=CC=C2)C=CC=C1	2	1	4	-4	-6.46003	-4
NP(N)(=O)NC(=O)C1=CC=C(F)C=C1	3		1	-4	-4	-4
OC(=O)CN1C(=O)C2=CC=CC3=CC=CC(C1=O)=C23	4	4	4	-4	-4	-4
CN(C)CC\C=C1/C2=C(COC3=C1C=CC=C3)C=CC=C2	4	1	4	-4	-5.71003	-4
FC1=CC=C(OCCCN2CCC3(CC2)N(CNC3=O)C4=CC=CC=C4)C=C1	1	1	2	-4	-6.46003	-4
CC(C(O)C1=CC=C(O)C=C1)N2CCC(CC3=CC=CC=C3)CC2	4	1	1	-4	-6.16003	-4
CSC1=CC2=C(SC3=C(CC2N4CCN(C)CC4)C=CC=C3)C=C1	2	1	1	-4.41003	-6.26003	-4.96003
C[C@](N)(CC1=CC(O)=C(O)C=C1)C(O)=O	4		1	-4	-4.61003	-5.36003
CC1=CC=C(C=C1)C(=C/CN2CCCC2)\C3=NC=CC=C3	4	1	4	-4	-5.61003	-4
COC(=O)[C@@H](N)CCCN\C(N)=N\[N+]([O-])=O	1	3	3	-4	-4	-4
ClC1=CC=CC(SC2CCNCC2)=N1	4		4	-4	-5.66003	-4
CC1=CC2=C(C=C1)N3CCNC4CCCC2=C34	4	1	4	-4	-5.76003	-4
CCN(CC)CCOC1=CC=C(CC2=CC=CC=C2)C=C1	2	1	3	-4	-5.21003	-4
CCN(CC)C(=O)C1=CC=C(C=C1)[C@@H](N2C[C@@H](C)N(CC=C)C[C@@H]2C)C3=CC=CC(OC)=C3	1	1	1	-4	-5.61003	-5.96003
CNCCCCOC1=C(CC2=CC=CC=C2)C=CC=C1	4	1	2	-4	-6.16003	-5.36003
CN\C(NCCSCC1=CSC(N=C(N)N)=N1)=N/C#N	4	4	2	-4	-5.06003	-5.06003
CC(C)NCC(O)C1=CC2=C(C=CC=C2)C=C1	3	1	4	-4	-5.46003	-4
CC(C)NCC(O)COC1=CC=C(NC(C)=O)C=C1	3	4	4	-4	-4	-4
CC1=C(CCCl)SC=N1	4	4	4	-4	-4	-4
NC(=N)N\N=C\C1=C(Cl)C=CC=C1Cl	4	2	4	-4	-5.01003	-4
CC(C)NCC(O)COC1=CC=C(COCCOC(C)C)C=C1	4	4	4	-4	-4	-4
CCN1CCC[C@H]1CNC(=O)C2=C(OC)C(Br)=CC=C2OC	3	1	4	-4	-4.71003	-4
CCCOC1=C(C=CC=C1)C2=NC3=NNN=C3C(=O)N2	4	4	4	-4	-4	-4
CC\C(C1=CC=CC=C1)=C(/C2=CC=CC=C2)C3=CC=C(OCCN(C)C)C=C3	2	2	1	-4.54065	-4.69065	-4.81565
C[C@H](CC1=CC=CC=C1)N(C)CC#C	1	1	2	-4	-4.86003	-4
CC(=O)O[C@H]1[C@@H](O)[C@H]2C(C)(C)CC[C@H](O)[C@]2(C)[C@@]3(O)C(=O)C[C@@](C)(O[C@]13C)C=C	3			-4.51565	-4	-4.79065
CC(=O)N1CCN(CC1)C2=CC=C(OC[C@H]3CO[C@@](CN4C=CN=C4)(O3)C5=CC=C(Cl)C=C5Cl)C=C2	4	4	1	-5.27127	-4.77127	-6.97127
CCN(CC)CC1CCCCN1CC(=O)N2C3=C(C=CC=C3)C(=O)NC4=C2N=CC=C4	4	3	2	-4	-4	-4
COC1=C(C=CC=C1)N2CCN(CCCCNC(=O)C3=CC=C(C=C3)C4=CC=C(C=C4)C(C)=O)CC2	3	1	1	-4	-5.76003	-4
COC(=O)C1=C(C)NC(C)=C(C1C2=CC=CC(=C2)[N+]([O-])=O)C(=O)OCCCN3CCC(CC3)(C4=CC=CC=C4)C5=CC=CC=C5	4	2	1	-5.86003	-5.81003	-5.06003
COC(=O)[C@H]1[C@@H](O)CC[C@H]2CN3CCC4=C(NC5=C4C=CC=C5)[C@@H]3C[C@H]12	4	1	4	-4	-5.76003	-4
CN(CC1=CN=C2N=C(N)N=C(N)C2=N1)C3=CC=C(C=C3)C(=O)N[C@@H](CCC(O)=O)C(O)=O	4	3	4	-4	-4	-4
Cl\C(=C/N1C=NC=N1)C2=C(Cl)C=C(Cl)C=C2	2	1	2	-4.96003	-5.31003	-4
CC3(COC1=CC=C(CC2SC(=O)NC2=O)C=C1)CCCCC3	4	4		-4	-4.41003	-4.81003
CN(C)C1=CC=CC(=C1)C(=O)NC2=CC(NC(=O)C3=CC=C(O)C=C3)=C(C)C=C2	1	4	3	-5.12127	-4.52127	-5.17127
CC[N+](CC)(CC)CCOC1=CC=C(\C=C\C2=CC=CC=C2)C=C1		4		-4	-6.21003	-4
COC1=C(OC)C(OC)=C2C(CC[C@H](NC(C)=O)C3=CC(=O)C(OC)=CC=C23)=C1	4	4	4	-4	-4	-4.61003
CC1(C)OC2=C(C=C(C=C2)C#N)[C@H]([C@@H]1O)N3CCCC3=O	4	4	4	-4	-4	-4
C[C@@H](C1=C(CCN(C)C)CC2=C1C=CC=C2)C3=NC=CC=C3	4	1	4	-4	-4.96003	-4
CN(C(=O)C1=C(O)C2=C(C=CC=C2)N(C)C1=O)C3=CC=CC=C3	4	4	4	-4	-4	-4
CCOC(=O)C1=CN=CN1C(C)C2=CC=CC=C2	4	4	2	-4.96003	-4	-5.76003
CC#C[C@]1(O)CC[C@H]2[C@@H]3CCC4=CC(=O)CCC4=C3[C@H](C[C@]12C)C5=CC=C(C=C5)N(C)C	1	1	1	-5.76003	-5.11003	-5.91003
C[C@H]1CN(CCCN2C3=C(C=CC=C3)C4=C2C=CC=C4)C[C@@H](C)N1	2	1	2	-4	-7.06003	-5.31003
OC(=O)\C=C\C1=CC=C(CN2C=CN=C2)C=C1	4	4	4	-4.51003	-4	-4
CC(C)OC(=O)C1=CC2=C(N1)C=CC=C2OCC(O)CNC(C)(C)C	4	1	2	-4	-4.96003	-4
C[C@]12[C@@H]3CC[C@@H](O3)[C@@]1(C)C(=O)OC2=O	4	2	4
OC1=CC2=C(NC=C2CCCCN3CCC(=CC3)C4=CC=CC=C4)C=C1	4	1	3	-4.61003	-6.71003	-4
CN[C@@H]1C[C@H](C2=CC=CC=C12)C3=CC(Cl)=C(Cl)C=C3	3	1	3	-4.57127	-6.87126	-5.52127
CC(CC1=CC=CC=C1)(NC(=O)CN)C2=CC=CC=C2	4	3	4	-4	-4.81003	-5.36003
COC1CN(CCCOC2=CC=C(F)C=C2)CCC1NC(=O)C3=CC(Cl)=C(N)C=C3OC	3	3	1	-4	-7.11003	-6.46003
CC1(OC(=CC1=O)C(O)=O)C2=CC=CC=C2	4	4	4	-4	-4	-4
CN(C)C\C=C(\C1=CC=C(Br)C=C1)C2=CN=CC=C2	4	1	2	-4	-5.76003	-4.56003
COC1=CC(N)=C(Cl)C=C1C(=O)NC2CN3CCC2CC3	4	3	3	-4	-4.81003	-4
CCOC(=O)C1=CC=C(OC(=O)CCCCCNC(N)=N)C=C1	3	1	1	-4	-7.01003	-4
FC1=CC=C(C=C1)C(=O)C2CCN(CCN3C(=S)NC4=CC=CC=C4C3=O)CC2	3	1	1	-4.56003	-6.11003	-4.71003
CCN1CCC[C@H]1CNC(=O)C2=C(OC)C(Cl)=CC(Cl)=C2O	4	1	4	-4	-4.86003	-4
O=C1N(CCCCN2CCN(CC2)C3=NC=CC=N3)S(=O)(=O)C4=C1C=CC=C4	3	1	1	-4.96003	-6.06003	-4
COC(=O)C1=C(C)NC(C)=C(C1C2=CC=CC3=NON=C23)C(=O)OC(C)C	2	4	1	-6.41003	-4.61003	-5.86003
CNCC[C@@H](OC1=C(C)C=CC=C1)C2=CC=CC=C2	4	1	4	-4	-5.61003	-4.66003
CN1CCC2=CC=CC3=C2[C@H]1CC4=C3C(O)=C(O)C=C4	1	1	1	-4	-4.81003	-5.91003
FC1=CC=C(C=C1)[C@@H]2CCNC[C@H]2COC3=CC=C4OCOC4=C3	1	1	4	-6.14065	-6.36565	-5.36565
[O-][N+](=O)OCCNC(=O)C1=CN=CC=C1		4		-4	-4	-4
ClC1=CC=C(C=C1)C(=O)NCCN2CCOCC2	4	1	2	-4	-5.01003	-4
COC1=CC(=CC(OC)=C1OC)C(=O)NCCCCCC(O)=O	4	4	4	-4	-4	-4
CC(=O)NC(CC1=CC=CC=C1)C(O)=O	4		4	-4	-4	-4
O=C(NCCC1=CNC2=C1C=CC=C2)C3=CN=CC=C3	4	1	4	-4.81003	-4.51003	-5.76003
N1C=NC(=C1C2=CC=CC=C2)C3=CC=CC=C3	3	3	1	-4	-5.01003	-5.46003
CCN(CC)CC(=O)NC1=C(C)C=C(C)C=C1C	4	1	1	-4	-4.51003	-4
CC1=CC=NC2=C1NC(=O)C3=CC=CN=C3N2C4CC4	4	4	4	-4	-4	-4
NC(=O)N1C2=C(CC(=O)C3=C1C=CC=C3)C=CC=C2	4	4	4	-4	-4	-4
COC1=C(N2CCNC(C)C2)C(F)=CC3=C1N(C=C(C(O)=O)C3=O)C4CC4	4	4	4	-4	-4	-4
COC1=CC=C2N3CCN(C)C4=NCCC(C2=C1)=C34	4	1	4	-4	-4.86003	-4
COC(=O)C1=CN=CN1C(C)C2=CC=CC=C2	4	4	4	-4.96003	-5.11003	-5.81003
CN1CCN(CC1)C2=C3SCCN4C=C(C(O)=O)C(=O)C(C=C2F)=C34	1	3	4	-4	-4	-4
COP(=S)(OC)SCN1C(=O)C2=C(C=CC=C2)C1=O	3	2	3	-6.11003	-4.81003	-5.11003
OC[C@@H]1CC[C@@H](O1)N2C=NC3=C2N=CNC3=O	2	4		-4	-5.21003	-4
COC(=O)C1=C(C=CC=C1)C(=O)OC	4			-4	-4	-4
CN1CCC[C@H]1C2=CN=CC=C2	3	4	4
N=C(NC1=CC=CC=C1)NC2=CC=CC=C2	4	1	4	-4	-6.2311	-4
NC(=O)C1=NN(C=N1)[C@@H]2O[C@H](CO)[C@@H](O)[C@H]2O	3	2		-4	-4	-4
CC1=CC(=O)[N-]S(=O)(=O)O1	4			-4	-4	-4
CC1(C)C2CCC1(C)C(=O)C2	1	1	4
OCCOC1=CC=CC=C1	4		1	-4	-4	-4.56003
CC\C(C1=CC=C(O)C=C1)=C(\CC)C2=CC=C(O)C=C2	4	3	4
CC(\C=C\C1=C(C)CCCC1(C)C)=C/C=C/C(C)=C/C(=O)NC2=CC=C(O)C=C2	3	4	3
CC[C@H]1OC(=O)[C@H](C)[C@@H](O[C@H]2C[C@@](C)(OC)[C@@H](O)[C@H](C)O2)[C@H](C)[C@@H](O[C@@H]3O[C@H](C)C[C@@H]([C@H]3O)N(C)C)[C@](C)(O)C[C@@H](C)CN(C)[C@H](C)[C@@H](O)[C@]1(C)O	4	4	1	-4	-4	-4.42127
N[C@@H](CC1=CC=C(C=C1)N(CCCl)CCCl)C(O)=O	2	2	1	-4.41003	-4.71003	-5.06003
CCCCC(CC)COC(=O)C1=CC=C(C=C1)N(C)C	1	1		-4.86565	-4.74065	-4.86565
C[C@]12CC(=O)[C@H]3[C@@H](CCC4=CC(=O)C=C[C@]34C)[C@@H]1CC[C@]2(O)C(=O)CO	4	4	4	-4	-4	-4
OC[C@H]1O[C@H](C[C@@H]1O)N2C=C(Br)C(=O)NC2=O	3		1	-4	-4	-4
CC(=O)OC1=C(C=CC=C1)C(=O)NC2=NC=C(S2)[N+]([O-])=O	1		1	-5.56003	-5.06003	-5.46003
CC1=C(O)C=CC=C1C(=O)N[C@@H](CSC2=CC=CC=C2)[C@H](O)CN3C[C@H]4CCCC[C@H]4C[C@H]3C(=O)NC(C)(C)C	1	1	1	-4.81003	-5.46003	-5.96003
O=C(C1=CC=CC=C1)C2=CC=CC=C2	1	1	2	-4	-4.56003	-4
C1=CC2=CC=CC=C2C=C1	3	2	1	-4	-4	-4
C[C@H]1O[C@H](C[C@H](O)[C@@H]1O)O[C@H]2[C@@H](O)C[C@H](O[C@H]3[C@@H](O)C[C@H](O[C@H]4CC[C@@]5(C)[C@H](CC[C@@H]6[C@@H]5C[C@@H](O)[C@]7(C)[C@H](CC[C@]67O)C8=CC(=O)OC8)C4)O[C@@H]3C)O[C@@H]2C	4		1	-4	-4	-4
OC1=CC=C(Cl)C=C1	3	1		-4	-4	-4
NC1=CC=C(O)C=C1	4	3	4	-4.81003	-5.21003	-5.86003
CC(=O)NC1=CC=C(C=C1)C(O)=O	4		4	-4	-4	-4
COC1=C(O)C=CC=C1	4			-4	-4	-4
OC1=C(C=CC=C1)C(=O)OC2=CC=CC=C2			4	-4	-4	-4
OC(=O)C1=CC(=CC=C1O)\N=N\C2=CC=C(C=C2)S(=O)(=O)NC3=NC=CC=C3	4	4	4	-4.91003	-4	-4
CS(=O)(=O)OCCCCOS(C)(=O)=O		4	4	-4	-4	-4
C1CCC(CC1)NC2CCCCC2	3	4	4	-4	-5.91003	-4
CCCCCCCC(O)=O	4		4	-4	-4	-4
CCCOC(=O)C1=CC=C(O)C=C1		3	2	-4	-4.45396	-4.08111
CCOC(=O)C1=CC=CC=C1C(=O)OCC			4	-4.57127	-4	-4
OC(=O)CC1=C2C=CC=CC2=CC=C1		3		-4	-4	-4.18201
COP(=O)(OC)OC=C(Cl)Cl	3	3	4	-4	-4	-4
C[C@]1(O)CC[C@H]2[C@@H]3CCC4=CC(=O)CC[C@]4(C)[C@H]3CC[C@]12C	3	4	1	-4.29612	-4.21709	-4
CCCCCCCCCCCC[N+](C)(C)CCOC1=CC=CC=C1	1			-4.51003	-5.76003	-4.91003
OC[C@@H](NC(=O)C(Cl)Cl)[C@H](O)C1=CC=C(C=C1)[N+]([O-])=O	4		3	-4.11193	-4.01222	-4
C[C@H]1C[C@H]2[C@@H]3CCC4=CC(=O)C=C[C@]4(C)[C@@]3(F)[C@@H](O)C[C@]2(C)[C@@]1(O)C(=O)CO	3	4	3	-4	-4	-4
CCCCCCCCCCCCCCCC[N+]1=CC=CC=C1	4			-4.41003	-7.01003	-4.51003
NC1=CC=C(C=C1)C(O)=O	4	4	2	-4	-4	-4
C=CC1=CC=CC=C1	4	4	4	-4	-4	-4
COC1=C(O)C=CC(=C1)[C@H]2OC3=C(O[C@@H]2CO)C=CC(=C3)[C@H]4OC5=CC(O)=CC(O)=C5C(=O)[C@@H]4O	4	4	2	-5.06003	-4	-5.01003
CC\C=C/C\C=C/C\C=C/CCCCCCCC(O)=O		1	4	-4.87127	-4	-4.52127
N[C@@H](CC1=CNC2=CC=C(O)C=C12)C(O)=O	4	4	3	-4.81003	-4.71003	-4.56003
CC(C)NC(C)C			4	-4	-4	-4
CCOP(=S)(OCC)OC1=CC(C)=NC(=N1)C(C)C	1	1	1	-5.71003	-4	-6.01003
COC(=O)C1=C(O)C=CC=C1	3	4	4	-4	-4	-4
CN(C)C1=CC=C(C=C1)C(C2=CC=C(C=C2)N(C)C)=C3C=CC(C=C3)=[N+](C)C	2	4	1	-5.01003	-5.51003	-4.76003
COC1=CC(OC)=C2C(=O)[C@]3(OC2=C1Cl)[C@H](C)CC(=O)C=C3OC	4	4	1	-4	-4	-4.46003
OC(=O)C1=CC(O)=C(O)C(O)=C1	1			-4	-4	-5.76003
OC(=O)COC1=CC=CC=C1	2	4		-4	-4	-4
NC1=NC=CS1	2	4		-4	-4	-4
NC1=C(C=CC=C1)C(O)=O	1	4	4	-4	-4	-4
OC1=C(Br)C=C(Br)C=C1Br	2	4	3	-4	-4	-4
CCCCCCC1=C(O)C=C(O)C=C1	4	1	4	-5.06003	-5.31003	-5.71003
CCN(CC)C(=O)C1=CC=CC(C)=C1	4	4	1	-4	-4	-4
COC1=CC2=C(C=CN=C2C=C1)[C@H](O)[C@H]3C[C@@H]4CCN3C[C@@H]4C=C			4
COC1=CC=C2N=CC=C([C@H](O)[C@H]3CC4CCN3C[C@@H]4C=C)C2=C1	4	4	4	-4	-7.26003	-4
CO[C@H]1[C@@H](C[C@@H]2CN3CCC4=C(NC5=C4C=CC(OC)=C5)[C@H]3C[C@@H]2[C@@H]1C(=O)OC)OC(=O)C6=CC(OC)=C(OC)C(OC)=C6	3	1	1	-4.61003	-4.81003	-5.11003
CN(C)[C@H]1[C@@H]2[C@@H](O)[C@H]3C(C(=O)C4=C(C=CC=C4O)[C@@]3(C)O)=C(O)[C@]2(O)C(=O)C(C(N)=O)=C1O	3	3	2	-4	-4.42127	-4.92127
CCCCCC(N)=O	2		3	-4	-4	-4
OC1=CC=C(Cl)C=C1CC2=CC(Cl)=CC=C2O	1	2	3	-5.11003	-4.56003	-4.86003
CC(=O)NC1=CC=CC=C1	3	4	4	-4	-4	-4
CC1=C(Cl)C=CC(O)=C1	2	1		-4	-4	-4.56003
OC(=O)CCCCC(O)=O	4	4	4	-4	-4.46003	-5.11003
OC1=CC=CC2=C1C(=O)C3=C(O)C=CC=C3C2=O	4		2	-4	-4	-5.96003
CC[N+]1=C2C=C(N)C=CC2=C3C=CC(N)=CC3=C1C4=CC=CC=C4	4			-4.56003	-5.46003	-5.81003
COC1=CC=C(O)C=C1	4	4	4	-4	-4	-4
OC(C(=O)C1=CC=CC=C1)C2=CC=CC=C2	3			-4	-4	-4
NC(=S)NCC=C	4		4	-4	-4	-4
NC(=O)C1=CC=CC=C1O	4	4	2	-4	-4	-4
CC(=O)NC1=CC=CC(O)=C1	3		2	-4	-4	-4
CN\C(NCCSCC1=C(C)N=CN1)=N/C#N	4	4	4	-4.86003	-4.81003	-4
COC1=C(O)C=CC(CC=C)=C1		4		-4.61003	-4	-4.71003
CC1=CC=C(C=C1)C2=CC(=NN2C3=CC=C(C=C3)S(N)(=O)=O)C(F)(F)F	1	1	3	-4.91003	-4.86003	-4.91003
CC(C)(C)NC(=O)[C@@H]1C[C@@H]2CCCC[C@@H]2CN1C[C@@H](O)[C@H](CC3=CC=CC=C3)NC(=O)[C@H](CC(N)=O)NC(=O)C4=NC5=C(C=CC=C5)C=C4	1	4	1
COC1=CC(\C=C\C)=CC=C1O	4	2	4
COC1=CC=C(\C=C\C)C=C1	4		4
OC1=CC(O)=CC=C1	4	4	4	-4	-4	-4.96003
O=C1OC2=C(C=CC=C2)C=C1	4	4	4	-4	-4	-4
[O-][N+](=O)C1=CC=C(O1)\C=N\N2CC(=O)NC2=O	4	1	3	-4	-4.86003	-5.71003
OC1=CC=CC(O)=C1O	4	4	4	-4.62127	-4.67127	-5.82127
OC[C@H](O)[C@H]1OC(=O)C(O)=C1O			2	-4	-4	-4.31063
C[C@]12CC[C@H]3[C@@H](CCC4=C3C=CC(O)=C4)[C@@H]1CC[C@@H]2O		4		-4	-4	-4.42127
CCOC1=C(O)C=CC(C=O)=C1	1	4	4	-4	-4	-4
OC1=C(C=CC=C1)C2=CC=CC=C2		1
CCCCCCCCCCCCCCCCCC(O)=O	4		1	-4	-4	-4
CCOC1=C(C=CC=C1)C(N)=O	4	4	4	-4	-4	-4
COP(=S)(OC)OC1=CC(C)=C(SC)C=C1	1	1		-5.41003	-4	-5.21003
COC1=C(O)C=CC(C=O)=C1	4	4	4	-4	-4	-4
CC12CCC(CC1)C(C)(C)O2	4	1	4	-4	-4	-4
C\C=C\C=C\C(O)=O	4	4	4	-4	-4	-4
CC1=CC(=C(O)C(=C1)C(C)(C)C)C(C)(C)C	4	4	3	-4	-4	-4
CC1=CC(O)=C2C(=O)C3=C(O)C=CC=C3C(=O)C2=C1	1		1	-4	-4	-4
CN(C)\N=N\C1=C(N=CN1)C(N)=O	4	4	3	-4	-4.66003	-4
OC(=O)C1=CC=CC=C1	1		1
CC1CC(CC(C)(C)C1)OC(=O)C2=CC=CC=C2O			4	-4	-4.76003	-4.86003
CC1=CC=C2N=C3N(CC[C@@]3(O)C(=O)C2=C1)C4=CC=CC=C4	1	1	3
N\C(SC1=CC=C(N)C=C1)=C(\C#N)C2=CC=CC=C2C(F)(F)F	1	2	1	-5.02127	-4.77127	-5.67127
COP(=O)(OC)OC(C1=CC=C(Cl)C=C1)P(=O)(OC)OC	4	4	4	-4	-4	-4
CCC(CC)(CC(=O)NC1=CC=CC(\C=C\C2=NC(=CS2)C3CCC3)=C1)C(O)=O	1	3	1	-4.41003	-4	-5.26003
CCN1CCCC1CNC(=O)C2=C(OC)C=C(N)C(=C2)S(=O)(=O)CC	4	4	4	-4	-4.91003	-4
CN1N=C(N)C2=CN([C@@H]3O[C@H](CO)[C@@H](O)[C@H]3O)C4=C2C1=NC=N4	4	4	4	-4	-4	-4
O[C@@H](CNCCOC1=CC=C(CC(O)=O)C=C1)C2=CC=CC=C2	4	4	4	-4	-4	-4
CCN(CC)CCCC(C)NC1=NC(NC2=CC3=C(N)C=C(C)N=C3C=C2)=CC(C)=N1	4		4	-4	-4.62127	-4
OC(=O)C1=CC2=C(NC=C2CCCCN3CCC(=CC3)C4=CC=CC=C4)C=C1	3	4	4	-4	-4.81003	-4
OC(CN1CCC(CC2=CC=C(F)C=C2)CC1)C3=CC=C(Cl)C=C3	1	1	1	-4	-7.54065	-4
COC1=CC2=C(CC(=O)N(CCCN(C)CCC3=CC(OC)=C(OC)C=C3)CC2)C=C1OC		4		-4	-4	-4
CC(C)CC(N(C)C)C1(CCC1)C2=CC=C(Cl)C=C2	1	1	1	-4	-5.36003	-5.36003
CCCCC[C@H](O)\C=C\[C@H]1[C@H](O)CC(=O)[C@@H]1C\C=C/CCCC(O)=O			4	-4	-4	-4
CN1CCC2=CC(Cl)=C(O)C=C2[C@@H]3[C@@H]1CCC4=C3C=CC=C4	4	4	3	-4	-9.01011	-4
COC1=CC=C(C=C1OC)S(=O)(=O)N2[C@H](C(=O)N3CCC[C@@H]3C(N)=O)[C@@](O)(C4=C2C=CC(Cl)=C4)C5=C(Cl)C=CC=C5	3	4	1	-4.81003	-4	-6.16003
COC1=CC2=C(C=C1OC)C3=C\C(=N/C4=C(C)C=C(C)C=C4C)N(C)C(=O)N3CC2	1	1	1	-6.31003	-4.91003	-4.56003
CC1=NN=C2CN=C(C3=C(SC(CCC(=O)N4CCOCC4)=C3)N12)C5=C(Cl)C=CC=C5	4	4	1	-4	-4	-4
CN1CC(=O)N=C1NC(=O)NC2=CC(Cl)=CC=C2	2	3	1	-4	-4.41003	-4
COC1=CC=C(C=C1)C2=C(C(=O)C3=CC=C(C=C3)C#N)C4=CC=C(OC)C=C4O2	1	1	2	-5.12127	-5.47127	-5.12127
CN[C@H]1CC[C@@H](C2=CC(Cl)=C(Cl)C=C2)C3=C1C=CC=C3	2	1	1	-4.81003	-5.66003	-5.36003
C[C@H]1[C@H]2CC[C@H]3[C@@H]4CC=C5C[C@H](CC[C@]5(C)[C@H]4CC[C@]23CN1C)N(C)C	3	1	4	-4	-4	-4
COC1=CC=C2[C@H]3CC[C@@]4(C)[C@@H](CC[C@@]4(O)C#C)[C@@H]3CCC2=C1		3	1	-5.26565	-4.65501	-5.51565
NC(=O)C1=CN=CC=C1	4		4	-4	-4	-4
NC1=NC(=O)N(C=C1)[C@@H]2O[C@H](CO)[C@@H](O)[C@@H]2O		2	4	-4.62127	-4	-4
CNCCC1=CC=CC=N1	4	4	3	-4	-4	-4
CC1=CC(=O)NC(=S)N1	4		4	-4	-4	-4
NC1=CC=C(C=C1)[As](O)(O)=O	3	2	4	-4	-4	-4
CC(C)(C)NC(=O)[C@H]1CC[C@H]2[C@@H]3CC[C@H]4NC(=O)C=C[C@]4(C)[C@H]3CC[C@]12C	4	4	4	-6.06003	-4	-4
CN1[C@@H](CCC1=O)C2=CN=CC=C2		4	4	-4	-4	-4
CC1=CC(N)=C2C=CC=CC2=[N+]1CCCCCCCCCC[N+]3=C(C)C=C(N)C4=CC=CC=C34	3	4		-4	-5.27127	-6.12127
CNC(=O)OC1=CC=C2N(C)[C@H]3N(C)CC[C@@]3(C)C2=C1	4	4	4	-4	-6.01003	-4
N[C@@H](CCC(N)=O)C(O)=O			4
CC(=O)[C@@]1(O)CC[C@H]2[C@@H]3CCC4=CC(=O)CC[C@]4(C)[C@H]3CC[C@]12C	4	3	4	-4.61003	-4	-4
CC1NC2=CC(Cl)=C(C=C2C(=O)N1C3=C(C)C=CC=C3)S(N)(=O)=O	4	4	1	-4	-4	-4
O\N=C1C2=CC=CC=C2NC/1=C3\C(=O)NC4=CC(Br)=CC=C34	1	2	1	-4.57127	-4.67127	-4.62127
CC1=CC(C)=C(N1)\C=C2/C(=O)NC3=CC=CC=C23	1	2
CC1=CC=C(C=C1)[S+]([O-])(=O)N[C@@H](CC2=CC=CC=C2)C(=O)CCl	1	1	1	-5.02127	-4.77127	-5.37127
N[C@@H](CC1=CNC2=C1C=CC=C2)C(O)=O		1	2
CCOP(=S)(OCC)OC1=CC=C2C(C)=C(Cl)C(=O)OC2=C1	1	1	1	-5.16003	-4.81003	-4.86003
CCNC1=NC(NCC)=NC(Cl)=N1	4	4	1	-4	-4	-4
CN(C)C(=O)NC1=CC(Cl)=C(Cl)C=C1	4	4	3	-4	-4	-4
NC(=O)C1=C(Cl)C=C(C=C1)[N+]([O-])=O	4	4	4	-4	-4	-4.56003
CC(C)=CC1C(C(=O)OCC2=CC(OC3=CC=CC=C3)=CC=C2)C1(C)C	1		1	-5.41003	-4.56003	-5.41003
CC(C)C1=CC=CC(=O)C(O)=C1	4	4	4	-4.67127	-4	-4
CCN(C(=O)C=CC)C1=C(C)C=CC=C1	4	4	2	-4	-4	-4
NC1=C(C(=NN1C2=C(Cl)C=C(C=C2Cl)C(F)(F)F)C#N)S(=O)C(F)(F)F		4	1	-5.41003	-5.41003	-4.71003
O=C1NC=NC2=C1C=NN2	4	4	3	-4	-4	-4
CC1=CC(O)=CC(C)=C1Cl	1			-4	-4	-4.41003
NS(=O)(=O)C1=C(Cl)C=CC(=C1)C2(O)NC(=O)C3=C2C=CC=C3	3	2	4	-4	-4.41003	-4
ClC1=CC=C(NC(=N)NC(=N)NCCCCCCNC(=N)NC(=N)NC2=CC=C(Cl)C=C2)C=C1	4	4	4	-4.61003	-5.61003	-4.41003
S1C2=C(C=CC=C2)C3=C1C=CC=C3	1			-4	-4	-4
COC1=C(OCC(O)CO)C=CC=C1	4		4	-4	-4	-4
S=C1NC=NC2=C1N=CN2	4	4	4	-4.71003	-4	-4
C1N2CN3CN1CN(C2)C3	3	2	1	-4	-4	-4
CN1C=CNC1=S		4	3	-4	-4	-4
NC(=O)NC(=O)CC1=CC=CC=C1	4	4	4	-4	-4	-4
OCC1=CC=CC=C1O	4	4	3	-4	-4	-4
CN1C(CC([O-])=O)=CC(C)=C1C(=O)C2=CC=C(Cl)C=C2	4	1	4	-4	-4	-4
OC1=C2N=CC=CC2=C(Br)C=C1Br	2	2	1	-4	-4	-4
CCC(=O)C1=C(O)C=C(O)C=C1O	1	3	4	-4.81003	-4.61003	-5.21003
CCC(C(CC)C1=CC=C(O)C=C1)C2=CC=C(O)C=C2	1	4
CCCCC(CC)CN1CN(CC(CC)CCCC)CC(C)(N)C1	2	1	1	-4	-6.66003	-4
CC(=O)NC(CCC(O)=O)C(O)=O			2
N[C@@H](CC1=CC(I)=C(OC2=CC(I)=C(O)C(I)=C2)C(I)=C1)C(O)=O	2	4	4	-4.56003	-4	-4.41003
NS(=O)(=O)C1=C(Cl)C=C2NC(CSCC=C)NS(=O)(=O)C2=C1	2	3	4	-4.53563	-4	-4
NC1=NC=NC2=C1N=CN2	4	4	4	-4	-4	-4
NC1=C2C=CC=CC2=NC3=C1C=CC=C3	1	3	3	-4	-4.76003	-4
CC1=NCCC2=C1NC3=C2C=CC(O)=C3	4	4	4	-4	-4.92127	-4
O=C(\C=C\C=C\C1=CC=C2OCOC2=C1)N3CCCCC3	1	2	2	-4.97127	-4.42127	-4.92127
OC[C@H]1O[C@@H](OC2=C(O)C=C3OC(=O)C=CC3=C2)[C@H](O)[C@@H](O)[C@@H]1O	4	3	4	-4	-4	-4
OCC(O)COC(=O)C1=C(NC2=C3C=CC(Cl)=CC3=NC=C2)C=CC=C1	2	4	1	-5.26003	-5.06003	-5.16003
CN1CCOC(C2=CC=CC=C2)C3=C(C1)C=CC=C3	4	1	4	-4	-5.66003	-4
CC1=C(OCC(O)CO)C=CC=C1	4		4	-4	-4.96003	-5.06003
ClC1=CC=C(CSC(CN2C=CN=C2)C3=CC=C(Cl)C=C3Cl)C=C1	1	2	1	-6.46003	-6.91003	-6.36003
CC(C(O)=O)C1=CC=C(C=C1)C(=O)C2=CC=CS2	2	4	4	-5.11003	-4	-4
O=C1NS(=O)(=O)C2=C1C=CC=C2	3	4	4	-4	-4	-4
CC(C(O)=O)C1=CC=C2C(NC3=CC=C(Cl)C=C23)=C1	3		4	-4	-4	-4
O=C(OCC1=CC=CC=C1)C2=CC=CC=C2	3			-4	-4	-4
CC1=C(C=C(C=C1C(N)=O)[N+]([O-])=O)[N+]([O-])=O	4	4	4	-4	-4	-4
OC(=O)C1=CC(=O)C2=C(O1)C=CC=C2	3	4	4	-4	-4	-4
CC(=O)NCCCCCC(O)=O	4	4	2	-4	-4	-4
CCCCC(CC)CNC(=N)NC(=N)NCCCCCCNC(=N)NC(=N)NCC(CC)CCCC	4	4	4	-4.91003	-6.21003	-4.81003
OC1=CC2=C(SC(=O)O2)C=C1		1		-4	-4	-4.42127
CC(=O)OC1=CC=C(Cl)C2=C1N=CC=C2	4			-4	-4	-4
CC(=O)NC1=CC=C(C=C1)[S+]([O-])(=O)NC2=CC=C(C=C2)[N+]([O-])=O	4	4	4
BrCCC(=O)N1CCN(CC1)C(=O)CCBr		4	4	-4	-5.01003	-4.46003
CCCCCCOC1=C(C=CC=C1)C(N)=O	1	3	2	-5.06003	-4.41003	-4.56003
CC(=O)OC1=CC=CC(O)=C1	4	4		-4	-4	-4.86003
CCC(CC1=C(I)C=C(I)C(N)=C1I)C(O)=O	1	4	4	-4.46003	-4.81003	-4.86003
OC1=NC(S)=NC=C1			3	-4.78563	-4.68001	-4.65501
OC(CN1C=NC=N1)(CN2C=NC=N2)C3=C(F)C=C(F)C=C3	4	4	3	-4.96003	-4.86003	-4.91003
CCCC1=NN(C)C2=C1N=C(NC2=O)C3=CC(=CC=C3OCC)S(=O)(=O)N4CCN(C)CC4		2	1	-4.76752	-4	-5.80085
CC1=CC=C(C=C1)S(=O)(=O)NC(=O)NN2CC3CCCC3C2	4	4	2	-4	-4	-6.91003
COC1=CC=C(C=C1)C(CN(C)C)C2(O)CCCCC2	4	1	4	-4	-4.96003	-4
COC1=CC=C(C=C1)C(=O)CC(=O)C2=CC=C(C=C2)C(C)(C)C	4	4	4	-4	-4	-4.91003
CC1=CC(OCC2CNC(=O)O2)=CC(C)=C1	4	4	2	-4	-4	-4
CC(C)[C@H]1CC[C@@H](CC1)C(=O)N[C@H](CC2=CC=CC=C2)C(O)=O	1	4	3	-4.56003	-4	-4
CCCCC1=NC2(CCCC2)C(=O)N1CC3=CC=C(C=C3)C4=CC=CC=C4C5=NN=NN5		4	4	-4.76003	-4	-5.31003
CCOC1=NC2=CC=CC(C(=O)OC(C)OC(=O)OC3CCCCC3)=C2N1CC4=CC=C(C=C4)C5=CC=CC=C5C6=NN=NN6	1	1	1	-5.32127	-4.87127	-5.62127
CN(CCOC1=CC=C(CC2SC(=O)NC2=O)C=C1)C3=NC=CC=C3	1	3	4	-4	-4	-4
CCCCC1=NC(Cl)=C(CO)N1CC2=CC=C(C=C2)C3=C(C=CC=C3)C4=NNN=N4	1	4	4	-5.41565	-4	-4.41063
CC1=C(C(=NO1)C2=CC=CC=C2)C3=CC=C(C=C3)S(N)(=O)=O	4	1	1	-4.71003	-4.76003	-4
CC(=O)OCC(CCN1C=NC2=C1N=C(N)N=C2)COC(C)=O	4	2	4	-4	-4	-4
CN(C)CCC1=CNC2=C1C=C(CS(=O)(=O)N3CCCC3)C=C2	4	3	4	-4	-4	-4
CCCC1=NC2=C(C=C(C=C2C)C3=NC4=C(C=CC=C4)N3C)N1CC5=CC=C(C=C5)C6=C(C=CC=C6)C(O)=O	1	3	4	-5.06003	-4.41003	-5.26003
COC1=CC2=NC(=NC(N)=C2C=C1OC)N(C)CCCNC(=O)C3CCCO3	4	2	4	-4	-4.61003	-4
COC(=O)N\N=C\C1=[N+]([O-])C2=C(C=CC=C2)[N+]([O-])=C1	3	4	4	-4	-4	-4
COC(=O)NC1=NC2=C(N1)C=CC(=C2)S(=O)C3=CC=CC=C3	4	4	2	-4	-4.91003	-4
CC(O)CN1C(C)=NC=C1[N+]([O-])=O	4	4	4	-4	-4	-4
COC(=O)[C@H](CC1=CC=CC=C1)NC(=O)[C@@H](N)CC(O)=O	1	2	1	-4	-4	-4
OC(=O)C(CC1=CC(=O)NC2=C1C=CC=C2)NC(=O)C3=CC=C(Cl)C=C3	4	4	4	-4	-4	-4
CCCC1=NC=CC(=C1)C(N)=S	3	4	4	-4	-4	-4
CCCCCCCCCCCCCCCCOP([O-])(=O)OCC[N+](C)(C)C	4	4	4	-4	-4.41003	-4.51003
NC(=O)CS(=O)C(C1=CC=CC=C1)C2=CC=CC=C2		4		-4	-4.71003	-4.56003
CN(C)C(=O)CC1=C(N=C2C=CC(C)=CN12)C3=CC=C(C)C=C3	3	3	2	-4	-4.71003	-4.76003
CCCCCNC(=N)N\N=C\C1=CNC2=C1C=C(OC)C=C2	3	1	4	-4	-6.66003	-4.46003
CCN(CC)CCOC1=CC2=C(C=C1)C3=C(C=C(OCCN(CC)CC)C=C3)C2=O	4	4	4	-4	-4	-4
CC(C)=CCOC1=C2OC(=O)C=CC2=CC3=C1OC=C3	1	2		-6.46003	-6.06003	-4
CC1=C(O)C(=O)C=C2C1=CC=C3[C@]2(C)CC[C@@]4(C)[C@@H]5C[C@@](C)(CC[C@@]5(C)CC[C@@]34C)C(O)=O	3	2	1
OC1=CC=C2C(=O)C3=C(C=CC=C3)C(=O)C2=C1O	2	4	1	-4.76003	-4.46003	-4.56003
COC1=CC(OC)=CC(OC)=C1	1	2	2	-4	-4	-4
CC(C)CCCC(C)CCCC(C)CCCC1(C)CCC2=C(C)C(OC(C)=O)=C(C)C(C)=C2O1		4
OC1=C2N=CC=CC2=C(Cl)C=C1Cl	2	1	4	-4	-4	-4
OC1=CC=C2C(=O)C3=C(C(O)=CC=C3O)C(=O)C2=C1O	3		1	-4.72127	-4.67127	-4.67127
OC1=C2N=CC=CC2=C(Cl)C=C1	1	1	1	-4	-4	-4
[O-][N+](=O)C1=CC=C(O1)\C=N\N2CCOC2=O	3	1	1	-4	-4.96565	-5.66565
COC1=C(F)C=C(C=C1)C2=CC(=NN2C3=CC=C(C=C3)S(N)(=O)=O)C(F)F	2	1	4	-5.21003	-5.26003	-4.66003
CCCCCC\C=C/CCCCCCCC1=CC=CC(O)=C1C(O)=O		2		-6.32127	-4	-4.72127
OC1=CC(O)=C2C(=O)C3=C(C=CC=C3)C(=O)C2=C1O	1		3	-4.92127	-4.57127	-4.77127
C[C@@]1(CO)[C@H](O)CC[C@@]2(C)[C@H](C\C=C3/[C@H](O)COC3=O)C(=C)CC[C@H]12		4	4	-4.26063	-4	-4.28563
CC(C)[C@@H]1CC[C@@H](C)CC1=O		2	4	-4	-4	-4
O=C1NC=NC2=C1NC=N2	1	1	2	-4	-4	-4
CC1=COC2=C1C(=O)C(=O)C3=C2C=CC4=C3CCCC4(C)C	1	1	1	-5.12127	-4.62127	-5.07127
CN1CC(=O)NC1=N	3	3	4	-4	-4	-4
CC1=CC=CC(C(O)=O)=C1O	4	3	4	-4	-4	-4
CNS(=O)(=O)Cc1ccc2ncc(CCN(C)C)c2c1	4	4	4	-4	-4	-4
OCCOCCN1CCN(CC1)C2=NC3=C(SC4=C2C=CC=C4)C=CC=C3	3	1	1	-4	-4	-4.41003
NC1=CC(O)=C(C=C1)C(=O)OC2=CC=CC=C2	1	1	1	-4.41003	-4	-4.86003
FC(C(F)(F)F)C(F)(F)OC1=C(Cl)C=C(NC(=O)NC(=O)C2=C(F)C=CC=C2F)C(Cl)=C1	2		4	-4.71003	-4	-4
CCOC1=CC2=C(C=C1)N=C3C=C(N)C=CC3=C2N	4	3	4	-4	-4.81003	-5.06003
CN1CCN(CC1)C2=NC3=C(NC4=C2C=C(C)S4)C=CC=C3			4	-4	-4	-4
OC[C@H]1O[C@H]([C@H](O)[C@@H]1O)N2C=NC3=C(O)N=CN=C23	3	4		-4	-4	-4
OC[C@H]1O[C@H]([C@H](O)[C@@H]1O)N2C=NC3=C2N=CN=C3S	4	4	4	-4.96003	-4	-4
CCCCC1CCC(CCCC(C)CCC(O)=O)CC1	4	4	4	-4.52127	-4	-4.62127
COC1=CC=C(OCC(=O)NC2=C(C)C=CC(=C2)C3=NC4=C(S3)C=CC=C4)C=C1	1	1	1	-6.42127	-4.72127	-6.57127
COC1=CC=C(OC)C(\C=C(/C#N)C2=NC3=CC=CC=C3C(=O)N2)=C1	1	1	2	-5.82127	-4	-5.77127
FC(F)(F)C(=O)NC1=C(C(=O)NC2=CC(Cl)=CC=C2)C3=C(CCCC3)S1		4		-6.45085	-5.35085	-5.70085
ClC1=C(\C=C(\C#N)C2=NC3=CC=CC=C3C(=O)N2)C=CC=C1	1	2	1	-5.47127	-4	-4
OC(=O)C1=C(OC2=C1C=C(OCC3=CC=C(Cl)C(Cl)=C3)C=C2)C4=CC=CC=C4		4		-4.52127	-4.42127	-4
CC1=CC=CC=C1C(=O)NC2=C(C(O)=O)C3=C(CC(CC3)C(C)(C)C)S2	2	4	2	-4	-4.57127	-4.92127
CC1=CC=C(C=C1)C(NC2=NC=CC=C2)C3=C(O)C4=NC=CC=C4C=C3	1	1	1	-4.42127	-4.42127	-4
CC1=CC=CC(NC(C2=CC=CC(Cl)=C2)C3=C(O)C4=NC=CC=C4C=C3)=N1	1	1	1	-4.55	-4	-4.25
CC1=CC(NC(C2=CC(C)=CC=C2O)C3=C(O)C4=NC=CC=C4C=C3)=NC=C1	1	1	1	-4.62127	-4	-4
CCOC(=O)C1=C(NCCC2=CC=C(OC)C(OC)=C2)C3=CC(OC)=CC=C3N=C1		3	1	-6.07127	-5.62127	-6.37127
CC1=CC(NC(C2=CC=CC(O)=C2)C3=C(O)C4=NC(C)=CC=C4C=C3)=NC=C1	1	1	1	-5.02127	-4.87127	-4.62127
CC1=C(C=C(C=C1)C2=C3C=CC=CC3=C(NC4=CC=CC=C4)N=N2)[S+]([O-])(=O)NCC5=NC6=C(N5)C=CC=C6	1	1	1	-4	-5.62127	-5.47127
COC1=CC=C(NC2=C3C=CC=CC3=C(N=N2)C4=CC(=C(C)C=C4)[S+]([O-])(=O)NCC5=NC6=C(N5)C=CC=C6)C=C1		2	1	-5.12127	-5.37127	-5.77127
CC1=CC=C(NC2=C3C=CC=CC3=C(N=N2)C4=CC(=C(C)C=C4)[S+]([O-])(=O)NCC5=NC6=C(N5)C=CC=C6)C=C1	1	1	1	-5.27127	-5.22127	-5.22127
CC1=C(C=C(C=C1)C2=C3C=CC=CC3=C(NC4=CC=C(Br)C=C4)N=N2)[S+]([O-])(=O)NCC5=NC6=C(N5)C=CC=C6	2	4	1	-6.07127	-5.47127	-5.67127
COC1=CC=C(C=C1)C(=O)NC2=NC3=C(C=CC=C3)N2CCOC4=CC=C(Cl)C=C4	1	2	1	-4.57127	-4	-4.42127
COC1=C(OC(=O)C2=C(F)C=CC=C2)C=CC(=C1)C(C3=C(O)NN=C3C)C4=C(O)NN=C4C	1	1	1	-4.97127	-4	-4.42127
COC1=CC=C(C=C1)C(=O)OC2=CC=C(C=C2)C(C3=C(O)NN=C3C)C4=C(O)NN=C4C	1	1	2	-4.97127	-4	-4
COC1=CC=C(C=C1)C(=O)OC2=CC=C(C=C2OC)C(C3=C(O)NN=C3C)C4=C(O)NN=C4C	1	1	1	-5.47127	-4	-4
COC1=C(OC(=O)C2=CC=CC(C)=C2)C=CC(=C1)C(C3=C(O)NN=C3C)C4=C(O)NN=C4C	1	1	1	-4.92127	-4	-4.72127
COC1=C(C=CC=C1)C(=O)OC2=CC=C(C=C2)C(C3=C(O)NN=C3C)C4=C(O)NN=C4C	1	1	1	-4.97127	-4	-4.42127
COC1=C(OC(=O)C2=C(OC)C=CC=C2)C=CC(=C1)C(C3=C(O)NN=C3C)C4=C(O)NN=C4C	1	1	1	-5.07127	-4	-4.77127
COC1=CC=C(C=C1C)C(NC2=CC=CC=N2)C3=C(O)C4=NC(C)=CC=C4C=C3	1	1		-5.57127	-4.67127	-4.42127
CC1=CC=C(CN2C(CC3=CC=CC=C3)=NC4=CC=CC=C24)C=C1	1	1	1	-4.87127	-4.97127	-5.02127
CCOC1=CC(=CC=C1OC)C(NC2=NC=CC(C)=C2)C3=C(O)C4=NC=CC=C4C=C3	1	1	1	-4.90084	-4.40084	-4.40084
CC1=CC=C2C=CC(C(NC3=NC=CC=C3)C4=CC=CC=C4)=C(O)C2=N1	1	1	1	-5.57127	-4.52127	-4.42127
OC1=C(Cl)C(=CC=C1)C(NC2=NC=CC=C2)C3=C(O)C4=NC=CC=C4C=C3	1	2	2	-4.97127	-4.87127	-4.42127
CCOC1=CC=C(NC(=O)CN2C=C(C(=O)C3=CC=CS3)C4=C2C=CC=C4)C=C1	1	1	1	-5.77127	-4	-5.82127
CC1=CC=CC(NC(C2=CC=CC=C2C)C3=C(O)C4=NC(C)=CC=C4C=C3)=N1	1	1	1	-5.17127	-4	-4.62127
CCOC1=CC=C(NC(=O)CN2C=C(C(=O)C3=CC=CC=C3)C4=C2C=CC=C4)C=C1	1	1	1	-4.77127	-5.07127	-5.27127
COC1=CC=C(Br)C2=C1C3=C(C2)SC(NC(=O)C4=C(SC)C=CC=C4)=N3	2	4	1	-4	-4	-5.17127
COC1=CC=C(Br)C2=C1C3=C(C2)SC(NC(=O)C4=CC=CC(C)=C4)=N3	1	4	1	-5.32127	-4	-5.32127
CC1=C(NC(=O)CN2C=C(C(=O)C3CCCCC3)C4=CC=CC=C24)C=CC=C1Cl	1	1	1	-5.67127	-5.27127	-6.07127
CC1=C(C)C(NC(=O)CN2C=C(C(=O)C3=CC=CO3)C4=CC=CC=C24)=CC=C1	1	1	1	-5.52127	-5.22127	-6.07127
CC1=CC=C(C)C(NC(=O)CN2C=C(C(=O)C3=CC=CO3)C4=CC=CC=C24)=C1	1	1	1	-4	-6.37127	-6.22127
CC1=CC=CC(C)=C1NC(=O)CN2C=C(C(=O)C3=CC=CO3)C4=CC=CC=C24	1	1	1	-5.42127	-5.02127	-5.62127
CCOC1=CC=C(NC(=O)CN2C=C(C(=O)C3=CC=CO3)C4=CC=CC=C24)C=C1		1	1	-5.32127	-7.92125	-6.32127
COC1=CC=CC(=C1)C2=C(O)C(=O)C3=CC(C)=CC=C3O2	1	1	1	-5.12127	-5.12127	-5.07127
CC1=CC(NC(C2=CC=CC=C2F)C3=C(O)C4=C(C=CC=N4)C=C3)=NC=C1	1	2	1	-4.62127	-4.57127	-4.62127
CCOC1=CC(=CC(OCC)=C1OCC)C(=O)NC2=C(C)C=C(C=C2)C3=NC4=C(O3)C=CC=N4	1	4	1	-5.12127	-4.67127	-4.72127
COC1=C(OCCN2C(NC(=O)C3=C(Cl)C=CC=C3)=NC4=C2C=CC=C4)C=CC=C1	1	3	1	-5.42127	-4	-5.32127
NC1=NC(NC2=CC=C(Br)C=C2)=C(C(N)=N1)[S+]([O-])(=O)C3=CC=CC=C3	1	4	1	-5.32127	-4.67127	-5.42127
CC(C)C1=CC=C(NC2=C(N=C3C=CC=CN23)C4=NC=CC=C4)C=C1	1	2	1	-5.92127	-4.57127	-4.42127
COC1=CC=C(NC(=O)CSC2=C(N=C(O2)C3=CC=CS3)[S+]([O-])(=O)C4=CC=C(Br)C=C4)C(OC)=C1		1	1	-6.32127	-4	-6.42127
COC1=C(NC(=O)CSC2=C(N=C(O2)C3=CC=CS3)[S+]([O-])(=O)C4=CC=C(Br)C=C4)C=CC=C1		1	1	-6.37127	-5.67127	-5.77127
COC(=O)C1=C(C2=CC=CC=C2)C3=CC=CC=C3[S+]([O-])(=O)N1CC(=O)NC4=C(Cl)C=CC=C4	1	4	1	-5.32127	-5.42127	-6.52127
COC1=CC=C(NC(=O)C2=C(C)NC3=NC(SCC4=CC=CC=C4C)=NN3C2C5=CC(OC)=C(O)C(OC)=C5)C=C1	3	4	1	-4	-4	-6.17127
COC(=O)C1=C(NC2=CC=CC=C2C1=O)SCC(=O)NC3=CC(C)=CC(C)=C3	1	2	1	-4.67127	-4	-5.32127
CCN1C=C2N=C(SCC(=O)NC3=CC(OC)=C(OC)C=C3)N(CC4=CC=C(Cl)C=C4)C(=O)C2=N1	3	4	1	-5.42127	-5.02127	-5.82127
CCCCN1C=NC2=CC(NCC3=CC=CC=C3Cl)=CC=C12	1	2	1	-5.67127	-6.92126	-5.82127
CC1=CC=C(NC(=O)CN2C3=C(SC=C3)C(=O)N(CCC(=O)NCC4=CC=C5OCOC5=C4)C2=O)C(C)=C1	4	2	1	-5.67127	-5.77127	-7.02127
CC1=CC=CC2=NC(=C(NC3=CC=CC=C3)N12)C4=NC=CC=C4	1	4	1	-5.92127	-4.57127	-4.67127
CC1=CC=CC2=NC(=C(NC3=CC=C(F)C=C3)N12)C4=NC=CC=C4	1	4	1	-5.92127	-4.97127	-4.67127
CC1=CN2C(C=C1)=NC(=C2NC3=CC=CC=C3C)C4=NC=CC=C4	2	3	1	-5.72127	-4.67127	-4.72127
CC1=CC2=NC(=C(NC3=CC=CC=C3C)N2C=C1)C4=NC=CC=C4	1	3	1	-6.02127	-4.72127	-4.57127
ClC1=CC=CC(NC(=O)CN2C3=C(SC=C3)C(=O)N(CCCCCC(=O)NCC4=CC5=C(OCO5)C=C4)C2=O)=C1	1	3	1	-6.62127	-7.57127	-7.17126
COC1=CC=CC(NC(=O)CN2C3=C(SC=C3)C(=O)N(CC(=O)NCC4=CC=C(C)C=C4)C2=O)=C1	1	2	1	-5.22127	-6.97127	-6.27127
CC1=CC=C(NC(=O)CN2C(=O)N(CCC(=O)N3CCC4=C(C3)C=CC=C4)C(=O)C5=CC=CC=C25)C(C)=C1	1	2	1	-6.47127	-4	-6.12127
CC1=CC=CC(NC(=O)CN2C(=O)N(CC3=CC=C(C=C3)C(=O)NCC4=CC=C5OCOC5=C4)C(=O)C6=CC=CC=C26)=C1	1	1	1	-4	-6.62127	-6.72127
CCOC1=C(NC(=O)CN2C(=O)N(CCC(=O)NCC3=CC4=C(OCO4)C=C3)C(=O)C5=CC=CC=C25)C=CC=C1	1	2	1	-6.22127	-6.37127	-7.37126
COC1=CC=C(NC(=O)CSC2=NC=C(N2)C3=CC=C(Cl)C=C3)C=C1OC	1	2	1	-6.07127	-4.87127	-5.62127
COC1=CC=C(C=C1)C2=NC(SCC(=O)NC3=CC4=C(OCO4)C=C3)=C(N2)C5=CC=CC=C5	1	2	1	-5.92127	-5.22127	-6.52127
FC1=CC=C(C=C1)C2=NC(SCC(=O)NC3=CC4=C(OCO4)C=C3)=C(N2)C5=CC=C(F)C=C5	1	2	1	-6.07127	-5.67127	-6.47127
COC1=CC=C(C=C1)C2=NC(SCC(=O)NC3=CC4=C(OCO4)C=C3)=C(N2)C5=CC=C(OC)C=C5	1	2	1	-6.07127	-5.27127	-6.82126
CCOC(=O)C1=CC=C(C=C1)N2C(C3=C(NN=C3C4=CC=CO4)C2=O)C5=CC=C(C)C=C5	1	2	1	-5.62127	-4	-5.07127
CCC(=O)N1CCC2=CC(=CC=C12)[S+]([O-])(=O)NC(CC3=CC=CC=C3)C(=O)NCC4=CC(OC)=CC=C4		3	1	-4.92127	-4.92127	-5.82127
CC1=NOC(\C=C\C2=CC=CS2)=C1[S+]([O-])(=O)N3CCC(CC3)C(=O)NC4=C(C)C=CC(C)=C4	1	1	1	-6.07127	-5.62127	-5.82127
CC1=NOC(\C=C\C2=CC=CS2)=C1[S+]([O-])(=O)N3CCC(CC3)C(=O)NCC4=CC=C(Cl)C=C4	1	1	1	-6.67127	-5.62127	-6.07127
CCC1=CC=C(C=C1)C2=NC(CSCC(=O)NCC3=CC=C(C)C=C3)=C(C)O2	1	1	1	-5.57127	-4.82127	-6.02127
COC1=C(CN2C=C(C(=O)C3=CC=C(Cl)C=C3)C(=O)C4=CC5=C(OCCO5)C=C24)C=CC=C1	1	3	1	-5.57127	-5.57127	-5.67127
COCCCNC(=O)CCC(=O)NNC1=NC2=CC=CC=C2C3=NC(=NN13)C4=CC=CC=C4		4	1	-5.02127	-4.42127	-4.77127
CC1=NN2C(=N1)C3=CC=CC=C3N=C2NNC(=O)CCC(=O)N4CCN(CC4)C5=CC=CC=C5		4	1	-4.67127	-4	-4.67127
CCOCCCNC(=O)CCC(=O)NNC1=NC2=CC=CC=C2C3=NC(=NN13)C4=CC=CC=C4		4	1	-5.47127	-4.42127	-4.42127
CC1=NN2C(=N1)C3=CC=CC=C3N=C2NNC(=O)CCC(=O)N4CCN(CC4)C5=CC=C(F)C=C5		4	1	-5.42127	-4	-5.02127
CC1=NN2C(=N1)C3=CC=CC=C3N=C2NNC(=O)CCC(=O)N4CCN(CC4)C5=CC=CC=C5F		4	1	-4.72127	-4	-4.67127
CC1CN(CCN1C2=CC=CC(C)=C2)C(=O)CCC(=O)NNC3=NC4=CC=CC=C4C5=NC(C)=NN35	1	4	1	-5.02127	-4.57127	-5.27127
CC1=NN2C(=N1)C3=CC=CC=C3N=C2NNC(=O)CCC(=O)N4CCN(CC4)C5=CC(Cl)=CC=C5		4	1	-4.92127	-4.52127	-5.17127
CC1=NN2C(=N1)C3=CC=CC=C3N=C2NNC(=O)CCC(=O)N4CCN(CC4)C5=CC(Cl)=CC=C5C		3	1	-5.02127	-4.67127	-5.52127
COC1=CC=C(CN2C(CCC(=O)NC3=CC(OC)=CC=C3)=NC4=CC=CN=C24)C=C1	3	1	1	-5.32127	-5.57127	-6.32127
COC1=CC=C(CN2C(CCC(=O)NC3=CC=C(C)C(C)=C3)=NC4=CC=CN=C24)C=C1	1	2	1	-5.12127	-4	-6.07127
COC1=CC=C(CN2C(CCC(=O)NC3=CC(C)=CC(C)=C3)=NC4=CC=CN=C24)C=C1	3	3	1	-5.17127	-5.52127	-5.77127
CCC1=CC=C(C=C1)C(=O)C2=CN(CC(=O)NC3=CC=C(OC)C(OC)=C3)C4=CC=C(C)C=C4C2=O	1	4	1	-5.62127	-4	-5.32127
OC(=O)C1=CC(NC(=O)CSC2=NC(=NC3=C2CC4=C(O3)C=CC=C4)C5=CC=C(F)C=C5)=CC=C1	1	4	3	-4.97127	-4	-4
COC1=CC=CC=C1NC(=O)C2=C(NC(=O)C3=CC=CC=C3C(F)(F)F)C4=C(O2)C=CC=C4	1	2	1	-5.57127	-4	-5.57127
CCOC(=O)N1CCC2=C(C1)SC3=C2C(=O)N(CC4=CC=CC=C4)C(=O)N3CC(=O)NC5=CC=C(F)C=C5	4	1	1	-5.62127	-5.82127	-5.57127
CCOC(=O)N1CCC2=C(C1)SC3=C2C(=O)N(CC4=CC=CC=C4)C(=O)N3CC(=O)NC5=CC(C)=CC=C5	3	1	1	-5.37127	-5.82127	-5.42127
CCOC(=O)N1CCC2=C(C1)SC3=C2C(=O)N(CCC4=CC=CC=C4)C(=O)N3CC(=O)NC5=CC(C)=CC=C5	3	2	1	-5.77127	-5.97127	-5.72127
COC1=CC(Cl)=C(C)C=C1NC(=O)CSC2=NC=C(C(=O)N2)[S+]([O-])(=O)C3=CC=C(C=C3)C(C)(C)C		4	1	-6.37127	-4.57127	-5.22127
CCN1CCN(CCCNC(=O)C2=CC3=C(S2)C4=C(C)C=CC=C4OC3)CC1	2	1	2	-4	-4.97127	-4.57127
CC(C)(C)C1=CC=C(C=C1)[S+]([O-])(=O)C2=CN=C(NC2=O)SCC(=O)NC3=CC=C(F)C(Cl)=C3	1	4	1	-6.27127	-4.77127	-5.57127
COCCN1C(=O)C2=C(N=C1SCC(=O)NC3=CC=C(F)C(Cl)=C3)C4=C(O2)C=CC=C4	3	1	1	-6.02127	-5.62127	-5.57127
CCOC1=CC=C2N=C(SC2=C1)N3CCC(CC3)C(=O)NC4=C(CC)C=CC=C4	1	4	1	-5.22127	-5.57127	-5.62127
FC1=CC=C(C=C1)N2CCN(CC2)C(=O)CSC3=NC4=CC=CC=C4N3CC5=CC=CC(F)=C5	1	3	1	-5.47127	-5.07127	-6.17127
FC1=CC=C(C=C1)N2CCN(CC2)C(=O)CSC3=NC4=CC=CC=C4N3CC5=CC=CC(Cl)=C5	1	3	1	-5.47127	-5.17127	-5.77127
COC1=CC=CC(CN2C(SCC(=O)N3CCN(CC3)C4=CC=C(F)C=C4)=NC5=CC=CC=C25)=C1	1	2	1	-5.67127	-4.97127	-6.27127
COC1=CC=C(CN2C(SCC(=O)N3CCN(CC3)C4=CC=C(F)C=C4)=NC5=CC=CC=C25)C=C1	1	2	1	-5.77127	-5.57127	-6.22127
FC1=CC=C(C=C1)N2CCN(CC2)C(=O)CSC3=NC4=CC=CC=C4N3CC5=CC=C(C=C)C=C5	1	1	1	-5.47127	-4	-5.92127
CC1=C(CN2C(SCC3=CC=C(C)C=C3)=NC4=CC=NC=C24)N=C(O1)C5=CC=CC=C5C	3	1	1	-5.12127	-5.62127	-5.62127
CC1=C(CN2C(SCC3=C(F)C=CC=C3)=NC4=CC=NC=C24)N=C(O1)C5=CC=CC=C5F	4	4	1	-5.02127	-4.92127	-5.87127
CC1=C(CN2C(SCC3=C(F)C=CC=C3)=NC4=CC=NC=C24)N=C(O1)C5=CC(Cl)=CC=C5	3	4	1	-5.12127	-5.32127	-5.67127
CC1=CC(C)=C(CN2C3=CC=CC=C3C4=C2C(=O)N(CC(=O)NCC5=CC=CC=N5)N=C4)C(C)=C1	1	4	1	-4.97127	-4.42127	-5.47127
CC1CCN(CC1)C(=O)C2=CC=C(CSC3=NC4=CC=NC=C4N3CC5=CC=CC(C)=C5)C=C2	1	1	1	-5.32127	-5.32127	-5.87127
CC1=CC=C(CN2C(SCC3=CC=C(C=C3)C(=O)N4CCCCCC4)=NC5=CC=NC=C25)C=C1	1	1	1	-4	-5.12127	-5.82127
CNC(=O)C1=CC=C(CSC2=NC3=CC=NC=C3N2CC4=CC=C(C)C=C4)C=C1	2	2	2	-5.12127	-4.87127	-5.62127
COC1=CC=C(CN2C(SCC3=CC=C(C=C3)C(=O)NC4CCCC4)=NC5=CC=NC=C25)C=C1	1	1	1	-6.17127	-5.22127	-5.77127
CC1=C2C=NN(CC(=O)NCC3=CC=CC=C3)C(=O)C2=C(C)N1CC4=CC=C(C)C=C4	3	2	1	-4.92127	-5.02127	-4.67127
CCOC1=CC=C(C=C1)C2=CC(NC(=O)NC3=CC=CC=C3Cl)=C(S2)C(=O)OC	1	4	1	-5.27127	-4	-4
CC1=CC=CN2C(=O)C3=C(N=C12)N(C4=NN=C(SCC5=CC=C(Cl)C=C5)S4)C(=O)C(=C3)C#N	1	4	1	-5.22127	-4	-4.97127
CC1=CN2C(=O)C3=C(N=C2C=C1)N(C4=NN=C(SCC5=CC=CC=C5)S4)C(=O)C(=C3)C#N	1	4	1	-5.42127	-4	-4.92127
CN(C)[S+]([O-])(=O)N1C=C(\C=C(/NC(=O)C2=CC=CC=C2)C(=O)NCCCN3C=CN=C3)C4=C1C=CC=C4	4	4	1	-6.67127	-7.27126	-6.57127
CCN1C=C(\C=C(/NC(=O)C2=CC=C(C)C=C2)C(=O)NCCCN3C=CN=C3)C4=C1C=CC=C4	4	1	1	-5.87127	-6.77127	-6.72127
NC1=C(N2C=CC=CC2=C1C3=NC(=CS3)C4=CC5=C(OCO5)C=C4)C(=O)C6=CC=CC=C6	1	4	1	-6.37127	-4	-6.32127
CCOCC1=CC(CN2CCN(CC2)C3=C(OC)C=CC=C3)=C(O)C4=NC=CC=C14	4	1	1	-4.57127	-4.67127	-4.67127
CCOCC1=CC(CN2CCN(CC2)C3=CC=CC(Cl)=C3)=C(O)C4=NC=CC=C14	1	1	1	-4.57127	-4.57127	-4.62127
CCOCC1=CC(CN2CCN(CC2)C3=CC=CC(=C3)C(F)(F)F)=C(O)C4=NC=CC=C14	1	2	1	-4.62127	-4.62127	-4.42127
CCCOCC1=CC(CN2CCN(CC2)C3=C(OC)C=CC=C3)=C(O)C4=NC=CC=C14	1	1	1	-5.12127	-4.87127	-4.57127
CCCOCC1=CC(CN2CCN(CC2)C3=CC=CC(Cl)=C3)=C(O)C4=NC=CC=C14	1	1	1	-5.17127	-4	-4.42127
CC(C)OCC1=CC(CN2CCN(CC2)C3=CC=CC=C3)=C(O)C4=NC=CC=C14	1	1	1	-4.57127	-4	-4
CC(C)OCC1=CC(CN2CCN(CC2)C3=CC=CC(=C3)C(F)(F)F)=C(O)C4=NC=CC=C14	1	2	1	-4.92127	-4	-4.42127
CCCCOCC1=CC(CN2CCN(CC2)C3=CC=CC(Cl)=C3)=C(O)C4=NC=CC=C14	1	1	1	-4.52127	-4.52127	-4.52127
CCOC(=O)C1=CC=C(NC(=O)C2=CC(=O)C3=C(O2)C(C)=C(C)C=C3)C=C1	1	1	1	-4	-4	-5.72127
CCOC1=CC=C(C=C1OCC)C2=NON=C2NC(=O)C3=C(C)C4=C(O3)C(C)=C(C)C=C4		2	1	-6.42127	-4	-5.62127
CC1=NC2=NC(NC(=O)C3=CC(Cl)=CC=C3)=NN2C(O)=C1CC4=CC=CC=C4	4	4	3	-4.57127	-4.42127	-4.42127
OC1=NC(=NC2=C1N=NN2CC3=CC=CC=C3C#N)C4CCCN(C4)[S+]([O-])(=O)C5=CC=C(F)C=C5	2	4	1	-5.77127	-6.07127	-5.92127
COC1=CC=C(NC(=O)C2=C(Cl)C=NC(SCC3=CC=C(F)C=C3)=N2)C=C1	1	1	1	-5.47127	-4	-5.32127
CCC1=CC=C(CN(CC2=CC=CO2)C(=O)COC3=CC=CC=C3Cl)C=C1	1	1	1	-5.02127	-5.12127	-5.02127
COC1=CC=C(CCNC(=O)C2=C(Cl)C=NC(SCC3=C(F)C=CC=C3)=N2)C=C1OC	1	2	1	-6.42127	-4	-6.52127
COC1=CC=C(CNC(=O)C2=C(Cl)C=NC(SCC3=C(F)C=CC=C3)=N2)C=C1	1	1	1	-4	-5.47127	-5.72127
CCOC(=O)C1=C(C)N=C(NC(=O)C2=C(C3=CC=CC=C3)C(=NN(C)C2=O)C4=CC=CC=C4)S1	2	4	1	-4.67127	-4	-4.52127
CC1=CC=C(C=C1)[S+]([O-])(=O)N2CCC3=C2C=CC(=C3)C(=O)NC4=CC=C(C=C4)C(F)(F)F	1	4	1	-5.82127	-4	-4
CC1=CC=C(C)C(NC2=NC3=NON=C3N=C2NC4=CC=CC(C)=C4C)=C1	1	2	1	-4	-4.97127	-5.62127
CC1=C(Cl)C=C(NC2=NC3=NON=C3N=C2NC4=CC(=CC=C4)C(F)(F)F)C=C1	1	4	1	-5.27127	-5.02127	-4
CCOC(=O)C1=CC=C(NC2=NC3=NON=C3N=C2NC4=CC=CC(C)=C4C)C=C1	1	2	1	-4	-4.97127	-4
COC1=C(NC(=O)CSC2=NC(C3=CC=C(C=C3)C(C)(C)C)=C(C#N)C(=O)N2)C=CC=C1	1	4	1	-6.12127	-4.52127	-5.57127
CC(C)(C)C1=CC=C(C=C1)C2=C(C#N)C(=O)NC(SCC(=O)NC3=CC=C(Cl)C=C3)=N2		4	1	-5.52127	-4.62127	-5.22127
CCOC(=O)C1=CC=C(NC(=O)CSC2=NC(C)=NC(=C2)C3=CC=CC=C3)C=C1	1	3	1	-6.02127	-4	-4.97127
COC1=CC=C(C=C1)C2=NOC(CCCC(=O)NC3=C(C)C(Cl)=CC=C3)=N2	1	2	1	-5.42127	-4	-6.32127
COC1=CC=C(C=C1)C(=O)NC2=CC3=C(OC(=N3)C4=CC=C(OC)C=C4)C=C2	4	3	1	-5.92127	-4	-5.32127
CCC1=CC=C(OCCN2C3=CC=CC=C3N=C2C4CN(CC5=CC=C(F)C=C5)C(=O)C4)C=C1	2	1	1	-4	-5.52127	-5.67127
CC1=CC=C(C=C1)[S+]([O-])(=O)NC2=NN3C(C=C(NC3=N2)C4=CC=CC=C4)C5=CC=C(F)C=C5				-4	-4	-5.32127
CC(=O)NC1=CC=C(C)C=C1C2=NC3=C(C=CC=C3)N(CC(=O)NC4=CC(Cl)=CC=C4C)C2=O	4	1	1	-5.52127	-6.47127	-5.77127
COC1=C(OC)C=C(CNC(=O)NC2=CC3=C(SC4=CC=CC=C4C(=O)N3C)C=C2)C=C1	1	3	1	-4	-5.02127	-5.92127
CCOC1=C(NC(=O)NC2=NN=C(S2)N3CCCC(C)C3)C=CC=C1	1	4	1	-4.97127	-4	-5.02127
COC1=C(OC)C=C(CC(=O)NC2=C(OC3=CC=CC=C23)C(=O)N4CCN(CC4)C5=CC=CC=C5F)C=C1	1	1	1	-4	-4	-6.67127
CC1=NN(CC(=O)NCCC2=CC=CC=C2)C(=O)C3=C1SC4=CC=CC=C34		4	1	-4.57127	-4.92127	-5.27127
CC(N1N=C(C)C2=C(C3=CC=CC=C3S2)C1=O)C(=O)NCC4=CC=C(C)C=C4	1	3	1	-5.62127	-4.87127	-6.12127
CCOC1=CC=C(CCNC(=O)CCCN2N=C(C)C3=C(C4=CC=CC=C4S3)C2=O)C=C1OCC	1	4	1	-5.57127	-4.57127	-5.62127
CC1=CC=CC=C1C(=O)NC2=CC=CC(=C2)C3=NC4=CC=CN=C4S3	1	4	1	-5.17127	-5.02127	-5.07127
CCC(SC1=NC2=C(N=CC=N2)C(=O)N1CC3=CC=C(C)C=C3)C(=O)NC4CCCCC4	3	3	1	-5.02127	-4.42127	-5.62127
COC1=CC=C(NC(=O)CN2C=CN(C(=O)C2=O)C3=CC(C)=C(C)C=C3)C=C1Cl	4	4	4	-4	-4	-5.17127
COC1=C(OC)C=C(C=C1)N2C=CN(CC(=O)NC3=CC=C(C)C(C)=C3)C(=O)C2=O	4	4	1	-4	-4	-4
CCOC1=C(OC)C=C(CNC(=O)CN2C(=O)C3=CC=CN3C4=CC=C(F)C=C24)C=C1	4	4	1	-4	-4	-5.62127
COC1=CC=CC=C1CNC(=O)C2CCCN(C2)C3=NC4=CC=CC=C4N5C=CC=C35	1	1	1	-7.17126	-5.57127	-5.92127
CC1=CC=CC=C1CNC(=O)CCCN2C(=O)C3=CC=CN3C4=CC=CC=C24	1	1	1	-5.02127	-5.17127	-5.82127
CCOC1=CC=C(CNC(=O)CN2C(=O)C3=CC=CN3C4=CC=C(F)C=C24)C=C1	1	2	1	-4	-4	-5.77127
COC1=CC=C2C(=C1)N(CC3=C(Cl)C=C(F)C=C3)C(C(O)=O)=C2CNCCC4=CC=CC=C4OC	1	4	1	-4.92127	-4.92127	-5.77127
CCOC(=O)C1=CC=C(NC(=O)CCN2C(=O)C3=CC=CN3C4=CC=CN=C24)C=C1	1	3	1	-4.97127	-4	-5.12127
CC1=CC=CC=C1CNC(=O)CCCN2C(=O)C3=CC=CN3C4=CC=CN=C24	1	2	1	-4.92127	-5.07127	-5.77127
CC1=CC(NC(=O)CN2C3=C(OC4=C3C=CC=C4)C(=O)N(C2=O)C5=CC=C(C)C(C)=C5)=CC(C)=C1	1	4	1	-5.22127	-6.37127	-4
ClC1=CC=C(C=C1)N2C(=O)N(CC(=O)NC3=CC=CC=C3)C4=C(OC5=C4C=CC=C5)C2=O	2	4	1	-5.32127	-6.07127	-5.07127
O=C(CN1C2=C(OC3=C2C=CC=C3)C(=O)N(CC4=CC=CO4)C1=O)NC5=CC=CC=C5	2	1	1	-5.32127	-6.12127	-5.52127
COC1=CC=C(Cl)C=C1NC(=O)CN2C(=O)CSC3=CC=C(C=C23)[S+]([O-])(=O)N4CCCC4	1	2	1	-6.12127	-5.07127	-5.32127
COC1=CC=CC(CNC(=O)C2CCCN(C2)C3=NN4C=C(N=C4S3)C5=CC=C(C)C=C5)=C1	1	4	1	-5.62127	-5.22127	-5.82127
FC1=C(CN2C(SCC3=CC=C(C=C3)C(=O)NC4CCCCC4)=NC5=CC=CN=C25)C=CC=C1	1	1	1	-6.47127	-5.02127	-5.82127
CC(=O)C1=CC=C(NC(=O)CN2C=C(C3=C2C=CC=C3)[S+]([O-])(=O)CC4=C(Cl)C=CC=C4)C=C1	1	4	1	-5.77127	-5.02127	-5.32127
CC1=C2C(=NN1C3=CC=CC=C3)C(=O)N(CCCC(=O)NC4=CC=C(Cl)C=C4C)N=C2C	1	4	1	-4.87127	-4	-5.47127
COC1=CC(OC)=C(CCNC(=O)CN2N=C(C)C3=C(C)N(N=C3C2=O)C4=CC=C(C)C=C4)C=C1	1	4	1	-5.07127	-5.07127	-5.77127
CC1=C2C(=NN1C3=CC=CC=C3)C(=O)N(CC(=O)NC4=CC=C(Cl)C=C4C)N=C2C	4	4	1	-4.92127	-4	-4.97127
COC1=CC=CC=C1NC(=O)CN2C(=O)N(CC3=NC(=NO3)C4=CC=CC=C4)C(=O)C5=CC=CC=C25		4	1	-5.62127	-5.27127	-5.52127
CC(=O)C1=CC=C(NC(=O)C2CCN(CC2)C3=NN=C(C)C4=C(C)N(N=C34)C5=CC=CC=C5)C=C1	2	4	2	-5.12127	-4.92127	-4.67127
CC1=C2C(=NN1C3=CC=CC=C3)C(=NN=C2C)N4CCC(CC4)C(=O)NCCC5=C(Cl)C=CC=C5	1	4	1	-5.72127	-5.67127	-5.47127
COC1=CC=C(C=C1)N2N=C3C(=C2C)C(C)=NN=C3N4CCCC(C4)C(=O)NCC5=CC=CC=C5C	1	3	1	-6.32127	-5.32127	-6.22127
COC1=CC=C(C=C1)N2N=C3C(=C2C)C(C)=NN=C3N4CCCC(C4)C(=O)NCC5=CC=CC(F)=C5	1	3	1	-5.07127	-5.77127	-5.62127
CCC1=CC=C(CNC(=O)C2CCCN(C2)C3=NN=C(C)C4=C(C)N(N=C34)C5=CC=C(OC)C=C5)C=C1	1	2	1	-5.77127	-5.12127	-5.62127
COC1=CC=C(C=C1)N2N=C3C(=C2C)C(C)=NN=C3N4CCCC(C4)C(=O)NCCC5=C(C)C=CC=C5	1	2	1	-6.17127	-5.57127	-5.77127
COC1=CC=C(CNC(=O)C2CCCN(C2)C3=NN=C(C)C4=C(C)N(N=C34)C5=CC=C(C)C=C5)C=C1	1	2	1	-5.57127	-4.72127	-6.27127
CC1=C2C(=NN1C3=CC=C(C)C=C3)C(=NN=C2C)N4CCCC(C4)C(=O)NCC5=CC=CC=C5C	1	1	1	-5.57127	-5.02127	-5.77127
CC1=NN=C2N1C(NC3=C(C)C=C(C)C=C3)=NC4=CC=CC=C24	1	1	1	-5.27127	-4	-5.22127
COC1=C(Cl)C=C(NC(=O)C2CCCN(C2)C3=NN=C(C)C4=C(C)N(N=C34)C5=CC=CC=C5)C=C1	3	3	1	-5.27127	-4.77127	-5.07127
CCOC1=CC=C(CCNC(=O)C2CCCN(C2)C3=NN=C(C)C4=C(C)N(N=C34)C5=CC=CC=C5)C=C1	1	4	1	-5.52127	-5.32127	-5.47127
CCC1=CC=C(CNC(=O)C2CCCN(C2)C3=NN=C(C)C4=C(C)N(N=C34)C5=CC=CC=C5)C=C1	1	1	1	-5.07127	-4.97127	-5.72127
CC1=C2C(=NN1C3=CC=CC=C3)C(SCC(=O)NCC4=C(Cl)C=CC=C4)=NN=C2C	1	4	1	-5.52127	-4.62127	-5.02127
COC1=CC=CC(CNCC2=CC=CN2C3=NN=C(S3)N4CCN(CC4)C5=CC=CC=C5)=C1	1	1	1	-5.02127	-5.47127	-6.27127
CC1=CC=C(C=C1)C(=O)C2=CN(CC(=O)NC3=CC=C4OCCOC4=C3)C5=NC(C)=CC=C5C2=O	2	4	1	-5.02127	-4	-5.47127
COC(=O)C1=C(NC2=CC=C(Cl)C=C2C1=O)SCC(=O)NC3=C(C=CC=C3)C(F)(F)F	1	3	1	-5.72127	-5.12127	-5.47127
CC(C)(C)C1=CC=C(C=C1)C2=NC3=CC(=O)NN3C(SCCCOC4=CC=CC=C4)=N2	3	4	2	-4.97127	-4	-5.02127
CC1=CC(OCCCSC2=NC(=NC3=CC(=O)NN23)C4=CC=C(C=C4)C(C)(C)C)=CC=C1Cl	2			-4.82127	-4	-4.92127
CC1=C(C)C(OCCCSC2=NC(=NC3=CC(=O)NN23)C4=CC=C(C=C4)C(C)(C)C)=CC=C1	3			-4.87127	-4	-4.87127
ClC1=CC=C(OCCSC2=NC(=NC3=CC(=O)NN23)C4=CC=CS4)C=C1	1	3	1	-4.72127	-4	-5.02127
CCCNC(=O)C1CCC(CN2C(=O)N(CC(=O)NCC3=CC=CC=C3)C4=C(SC=C4)C2=O)CC1	1	4	1	-5.22127	-4	-5.17127
CC1=CC(N2CCN(CC2)C(=O)C3CCN(CC3)[S+]([O-])(=O)C4=CC5=C(NC(=O)O5)C=C4)=C(C)C=C1	2	4	1	-5.67127	-4	-4
CC1=C(Br)C=CC(NC(=O)C2CCN(CC2)[S+]([O-])(=O)C3=CC4=C(NC(=O)O4)C=C3)=C1	4	4	1	-6.37127	-4.77127	-5.02127
CC1=CC=C(C=C1C)C2=NC3=C(C=CC=C3)N(CC(=O)NC4=CC=CC=C4F)C(=O)C2	1	1	1	-4	-5.62127	-5.32127
COC1=CC=C(C=C1)C2=NNC3=C2C=NC4=C3C=C(OC)C(OC)=C4	2	1	2	-4	-4	-4.67127
CCN(CC)[S+]([O-])(=O)C1=CC=C2N(C)C(CN(C)C(=O)NC3=CC(Cl)=CC=C3)=NC2=C1	1	3	1	-6.07127	-4.57127	-4
COC1=CC=C(NC(=O)CSC2=NC3=CC=CC=C3N2CC4=CC(OC)=CC=C4)C=C1	1	1	1	-5.57127	-5.62127	-5.77127
COC1=CC=C(CNC(=O)CN2C(SCC(=O)NC3=CC=C(C)C(C)=C3)=NC4=CC=CC=C24)C=C1	1	1	1	-5.62127	-4	-5.82127
CN1N=C(C(=O)N2CCN(CC2)C3=CC(C)=CC=C3C)C4=C1C5=CC(C)=CC=C5SC4	1	3	1	-5.62127	-4	-5.62127
CC1=CC=C(CNC(=O)C2CCN(CC2)[S+]([O-])(=O)C3=C(ON=C3C)\C=C\C4=C(F)C=CC=C4)O1	1	1	1	-4	-4	-5.12127
CCOC1=CC=CC=C1CNC(=O)C2CCN(CC2)[S+]([O-])(=O)C3=C(ON=C3C)\C=C\C4=C(F)C=CC=C4	1	3	1	-6.82126	-4	-5.92127
CCOC(=O)C1=CC(=NN1)[S+]([O-])(=O)N2CCN(CC2)C3=CC(Cl)=CC=C3C	1	4	1	-5.92127	-4.57127	-4.87127
CCOC1=CC=C(C=C1OCC)C(=O)NCC[S+]([O-])(=O)N2CCN(CC2)C3=C(F)C=CC=C3	1	3	1	-5.67127	-5.52127	-5.72127
CC(C)C1=C(SCC(=O)NC2=CC(C)=CC(C)=C2)C3=C(N=C1)N(C)C(=O)N(C)C3=O	2	4	1	-4.42127	-5.27127	-6.52127
CC1=CC=C(OCC(=O)NC2=CC=CC(OCC3=CC(=O)N4C=CC=C(C)C4=N3)=C2)C=C1C	1	1	1	-6.12127	-4	-5.72127
COC1=CC(OC)=CC(NC(=O)CSC2=NC3=C(C=CC=C3)N=C2CC4=CC=CC=C4OC)=C1		1	1	-6.52127	-5.62127	-5.77127
CC1=CC=CN2C(=O)C=C(CSC3=NN=C(NC(=O)COC4=CC=CC=C4)S3)N=C12	1	4	2	-5.17127	-4	-5.12127
ClC1=CC(NC(=O)NC2=C(OCC3=CC(=O)N4C=CC=CC4=N3)C=CC=C2)=CC=C1	1	4	1	-5.82127	-4	-5.57127
COC1=CC=C(CN2C=CN=C2SCC(=O)NC3=NC4=C(S3)C=CC=C4)C=C1	1	1	1	-5.62127	-5.02127	-5.52127
COC(=O)C1=C2C=CC=CC2=C(N=C1)N3CCN(CC3)C4=CC=C(OC)C=C4	1	2	1	-5.67127	-4	-4.97127
CC1=CC2=C(C=C1)N=C(NC(=O)CSC3=NC=CN3CC4=CC=CC=C4)S2	1	3	1	-5.02127	-5.07127	-5.32127
FC1=CC=C(CN2C=CN=C2SCC(=O)NC3=NC4=C(S3)C=CC=C4)C=C1	1	1	1	-5.12127	-4.97127	-5.52127
CCC1=CC=C(C=C1)[S+]([O-])(=O)NCC2=CC=C3N(CCC3=C2)C(=O)C4=CC=C(C)C=C4	1	3	1	-6.17127	-5.27127	-5.62127
CCOC1=CC=C(C=C1)[S+]([O-])(=O)NCC2=CC=C3N(CCC3=C2)C(=O)C4=CC=C(C)C=C4	1	2	1	-6.52127	-5.17127	-5.52127
COC(=O)C1=C(ON=C1C2=CC=C(Cl)C=C2)N3CCN(CC3)C4=C(OC)C=CC=C4	1	1	1	-4	-4	-5.12127
CCOC1=CC(CNC(=O)C2=CC(NC(=O)C3=NSC4=C3C=CC=C4)=C(C)C=C2)=CC=C1OC	1	3	1	-5.82127	-4	-5.67127
COC1=C(NC(=O)C2=CC(C)=CC(C)=C2)C=C(C=C1)C3=CN4C=CC=NC4=N3	1	4	1	-5.32127	-4.62127	-5.32127
COC1=C(NC(=O)COC2=CC=CC=C2)C=C(C=C1)C3=CN4C=CC=NC4=N3	1	2	1	-5.32127	-4.52127	-4.97127
CCOC(=O)C1=CC=C(NC(=O)CSC2=NC3=C(NC4=C3C=CC=C4)C(=O)N2C)C=C1	3	2	1	-5.52127	-4	-5.32127
CCC1=NN=C(NC(=O)CSC2=NC3=C(NC4=C3C=CC=C4)C(=O)N2C5=CC=C(OC)C=C5)S1	1	4	1	-5.37127	-5.47127	-5.92127
OC1=C(C=CC2=C1N=CC=C2)C(NC3=NC=CC=C3)C4=CC=CC=C4F	1	2	1	-4.72127	-4.62127	-4.62127
CC1=CC=C(CN2C=CN=C2SCC(=O)NC3=NC4=C(S3)C=CC=C4)C=C1	1	1	1	-5.07127	-4.97127	-5.67127
COC1=CC=C(CC(=O)NCC(C2=CC=CS2)[S+]([O-])(=O)C3=CC=C(Cl)C=C3)C=C1	1	1	1	-5.62127	-5.22127	-6.17127
COC1=C(OC)C=C(NC(=O)CSC2=NN=C(NC(=O)NC3CCCCC3)S2)C=C1	1	3	1	-4.67127	-4.57127	-5.67127
COC1=CC=C(CNC(=O)C(=O)NC2=C3CSCC3=NN2C4=CC=CC=C4)C=C1		2	1	-5.47127	-4	-5.17127
CC(NC(=O)C(=O)NC1=C2CSCC2=NN1C3=CC=CC=C3)C4=CC=CC=C4		2	1	-5.47127	-4	-5.02127
CCOCCCNC(=O)C(=O)NC1=C2CSCC2=NN1C3=CC=C(OC)C=C3		4	1	-4.97127	-4	-4.67127
CC(=O)N1N2C=NN=C2SC(C(C)=O)=C1C3=CC=C(Cl)C(Cl)=C3	1	1	1	-5.62127	-4.67127	-5.32127
CC(O)CNC(=O)C(=O)NC1=C2CSCC2=NN1C3=CC=C(Cl)C=C3		3	2	-5.07127	-4	-4.42127
COCCCNC(=O)C(=O)NC1=C2CSCC2=NN1C3=CC(Cl)=CC=C3		3	1	-5.07127	-4	-5.12127
OC1=C(SC2=NC(=NN12)C3=CC=CO3)C(N4CCN(CC5=CC=CC=C5)CC4)C6=C(Cl)C=C(Cl)C=C6	1	2	1	-5.22127	-5.12127	-5.27127
OC1=C(SC2=NC(=NN12)C3=CC=CO3)C(N4CCN(CC4)C5=CC(Cl)=CC=C5)C6=CC=CC=C6	1	2	1	-5.27127	-4.87127	-5.47127
FC1=CC(=CC=C1)C2=C(N=NC(SCC(=O)NC3CCCCC3)=N2)C4=CC(F)=CC=C4	1	3	1	-5.82127	-4	-5.87127
CCC1=NC2=CC=C(C=C2N=C1CC)C(=O)N3CCN(CC3)C4=C(C)C=CC(C)=C4	1	3	1	-5.42127	-4.67127	-5.17127
CN1C2=CC(NC(=O)CC3=CC=C(Cl)C=C3)=CC=C2SC4=C(C=CC=C4)C1=O	1	4	1	-4.92127	-5.22127	-4
COC1=CC=C(CCNC(=O)CSC2=NC3=C(C=CC=C3)C4=NC(CCC(=O)NCC5=C(OC)C=CC=C5)C(=O)N24)C=C1OC	2	4	1	-6.52127	-4	-5.92127
CC1=CC=C(CSC2=NC3=C(C=CC=C3)C4=NC(CC(=O)NCC5=CC=CS5)C(=O)N24)C=C1	1	1	1	-6.42127	-5.17127	-6.02127
FC1=CC=C(CSC2=NC3=C(C=CC=C3)C4=NC(CC(=O)NC5CCCCC5)C(=O)N24)C=C1	2	1	1	-5.57127	-5.52127	-5.67127
CC(C)C1=CC=C(NC(=O)CSC2=NC3=C(C=CC=C3)C4=NC(CC(=O)NC5CCCCC5)C(=O)N24)C=C1	1	1	1	-4.92127	-5.47127	-5.72127
FC1=C(CN2C(=O)C3=C(C=CS3)N=C2SCC(=O)NCC4=CC=CC=C4Cl)C=CC=C1	1	1	1	-5.82127	-5.57127	-5.82127
ClC1=CC=C(CSC2=NC3=C(C=CC=C3)C4=NC(CC(=O)NCCC5=CC=CC=C5)C(=O)N24)C=C1	3	1	1	-5.72127	-5.67127	-5.72127
COC1=CC=C(C=C1CSC2=NC3=C(C=CC=C3)C(NCC4=CC=CC=C4)=N2)C(C)=O	1	2	1	-5.67127	-5.52127	-5.07127
COC1=C(OC)C=C(CCNC2=NC(SCC3=CC(F)=CC=C3)=NC4=CC=CC=C24)C=C1	1	1	1	-6.12127	-6.52127	-5.77127
COC1=C(OC)C=C(CCNC2=NC(SCC3=CC=CC=C3F)=NC4=CC=CC=C24)C=C1	1	1	1	-6.07127	-6.82126	-5.97127
CCC(SC1=NC2=C(C=CC=C2)C3=NC(CCN4C=NC=C4C)=NN13)C(=O)NC5=CC(OC)=CC=C5	4	1	1	-5.72127	-4.92127	-5.62127
CC1=CN=CN1CCC2=NN3C(=N2)C4=C(C=CC=C4)N=C3SCC(=O)NC5=CC=CC(C)=C5	2	1	1	-5.82127	-5.52127	-5.27127
CC1=CN=CN1CCC2=NN3C(=N2)C4=C(C=CC=C4)N=C3SCC(=O)NC5=CC=CC(Cl)=C5	3	1	1	-6.37127	-6.17127	-5.67127
COC1=C(OC)C=C(CCNC2=NC(SCC3=C(Cl)C=CC=C3)=NC4=CC=CC=C24)C=C1	1	1	1	-6.72127	-6.12127	-5.62127
CCOC1=CC=CC=C1NC(=O)CSC2=NC3=C(C=CC=C3)C4=NC(CCN5C=NC=C5C)=NN24	3	1	1	-6.02127	-4.97127	-5.57127
CC1=CN=CN1CCC2=NN3C(=N2)C4=C(C=CC=C4)N=C3SCC(=O)NC5=CC=C(C)C(F)=C5	3	1	1	-6.27127	-5.42127	-5.62127
CC1=CC=C(CN2C(=O)C3=C(C=CS3)N=C2SCC(=O)NCC4=CC=CC=C4)C=C1	1	1	1	-5.17127	-5.22127	-5.77127
CN1N=CC2=C1N=CN=C2N3CCN(CC3)C4=CC=C(C=C4)C(C)=O	4	4	2	-4	-4	-4.42127
ClC1=CC=CC(=C1)N2N=CC3=C2N=CN=C3NCCCN4C=CN=C4	3	4	3	-6.42127	-5.67127	-6.52127
CC1=C(Cl)C=C(C=C1)N2N=CC3=C2N=CN=C3NCCCN4C=CN=C4	3	4	2	-6.22127	-5.42127	-6.42127
CCOC(=O)C1=C(NC(=O)C2=CC=C(C=C2)[S+]([O-])(=O)N(C)C3CCCCC3)SC4=C1CCN(C4)C(C)C	1	3	1	-5.27127	-5.02127	-5.07127
CC1=C(C=CC=C1)N2C(=O)C3=C(NN=C3)N=C2SCC4=CC=C(Cl)C=C4	3	3	1	-5.62127	-4.67127	-5.02127
COC1=CC=CC=C1NC2=NC(=NC3=CC=CC=C23)C4=C(F)C=CC=C4	1	2	1	-4.92127	-4	-4.57127
[O-][S+]1C2=CC=CC=C2C(=O)N(CC3=CC=CC(Cl)=C3)C4=C1C=CC(=C4)C(=O)NCC5=CC=CO5	1	1	1	-5.87127	-5.92127	-5.87127
CCC1=CC=C(C=C1)N2C(=O)C3=C(NN=C3)N=C2SCC4=C(Cl)C=CC=C4	3	4	1	-4.62127	-4.82127	-5.17127
CCC1=CC=C(C=C1)N2C(=O)C3=C(NN=C3)N=C2SCC4=CC=CC(F)=C4	1	4	1	-4.92127	-4.92127	-5.02127
CCC1=CC=C(C=C1)N2C(=O)C3=C(NN=C3)N=C2SCC4=C(C)C=CC=C4	2	4	1	-4.72127	-5.02127	-5.57127
CC1=C(C)C=C(C=C1)N2C(=O)C3=C(NN=C3)N=C2SCC4=C(F)C=CC=C4	1	4	1	-4.87127	-4.77127	-5.17127
CC1=C(C)C=C(C=C1)N2C(=O)C3=C(NN=C3)N=C2SCC4=CC=CC(F)=C4	1	4	1	-5.82127	-5.07127	-5.12127
CC1=C(C)C=C(C=C1)N2C(=O)C3=C(NN=C3)N=C2SCC4=C(C)C=CC=C4	1	4	1	-4.67127	-4.92127	-5.22127
COC(=O)C1=CC=C(C=C1)C2C=C(NC3=NC4=C(C=CC=C4)N23)C5=CC=C(Cl)C=C5	1	1	1	-5.57127	-5.47127	-4.67127
CCC1=CC=C(C=C1)C2=CC(N3C(N2)=NC4=C3C=CC=C4)C5=C(OC)C(OC)=CC=C5	2		1	-5.42127	-4.77127	-5.17127
CCC1=CC=C(C=C1)C2=CC(N3C(N2)=NC4=C3C=CC=C4)C5=CC(C)=CC=C5	1	2	1	-5.22127	-5.02127	-4.97127
CC1=CC=C(C=C1)C2=CC(N3C(N2)=NC4=C3C=CC=C4)C5=C(C)C=CC=C5	4		1	-5.47127	-5.02127	-5.12127
CCC1=CC=C(C=C1)C2=CC(N3C(N2)=NC4=C3C=CC=C4)C5=C(F)C=CC=C5Cl	1	4	1	-5.27127	-4.52127	-4
CC1=C(C)C=C(C=C1)C2=CC(N3C(N2)=NC4=C3C=CC=C4)C5=C(F)C=CC=C5	1	2	1	-5.22127	-4.97127	-5.27127
COC1=CC(=CC(OC)=C1OC)C(=O)NC(C2=CC=C(Cl)C=C2)C3=C(O)C4=C(C=CC=N4)C(Cl)=C3	3	4	1	-4.97127	-4	-4
COC1=CC(=CC(OC)=C1OC)C(=O)NC(C2=C(Cl)C=CC=C2)C3=C(O)C4=C(C=CC=N4)C(Cl)=C3	3	4	1	-4.82127	-4	-4
CCOC1=CC=C(C=C1)C(NC(=O)C2=CC(OC)=C(OC)C(OC)=C2)C3=C(O)C4=C(C=CC=N4)C(Cl)=C3	1	4	3	-4.52127	-4	-4
COC1=CC=C(C=C1)C(=O)NC(C2=CC=C(Cl)C=C2)C3=C(O)C4=C(C=CC=N4)C(Cl)=C3	3	4	1	-4.62127	-4	-4.42127
COC1=CC=CC(=C1)C(=O)NC(C2=CC=C(Cl)C=C2)C3=C(O)C4=C(C=CC=N4)C(Cl)=C3	4	4	1	-4.62127	-4	-4.57127
COC1=CC=C(C=C1)C(=O)NC(C2=C(Cl)C=CC=C2)C3=C(O)C4=C(C=CC=N4)C(Cl)=C3	2		1	-5.22127	-6.52127	-4
CC1=C(Cl)C=CC(=C1)N2C(=O)C3=C(NN=C3)N=C2SCC4=C(F)C=CC=C4	1	4	1	-4.62127	-4.72127	-5.22127
CCC1=CC=C(C=C1)N2C(=O)C3=C(NN=C3)N=C2SCC4=C(F)C=CC=C4	1	4	1	-5.32127	-4.92127	-5.17127
COC1=CC=C(NC(=O)CN2C=C(C(=O)C3=CC=CS3)C4=C2C=CC=C4)C=C1		1	1	-4.42127	-5.57127	-5.87127
COC1=CC2=C(C=C1)C3=C(CC2)SC(NC(=O)C4=CC(Br)=CC=C4)=N3	1	3	1	-5.27127	-4	-5.67127
CC1=CC=CC(NC(C2=C(F)C=CC=C2)C3=C(O)C4=NC(C)=CC=C4C=C3)=N1	1	2	1	-5.22127	-4	-4.42127
COC1=CC=C(NC(=O)CSC2=NC(=CC(=N2)C(F)(F)F)C3=CC=CS3)C=C1OC	1	1	1	-4	-4	-5.77127
COC1=CC=C(C=C1)N2N=C3C(=C2C)C(C)=NN=C3N4CCCC(C4)C(=O)NCC5=CC=C(C)C=C5	1	4	1	-4	-5.42127	-6.62127
CC1=C(C(N2N=C(SCC3=CC=CC=C3)N=C2N1)C4=CN=CC=C4)C(=O)NC5=C(C)C=CC=C5	1	2	1	-5.62127	-4	-5.72127
COC1=CC=C(C=C1)C2=NN3C(C4=CC(OC)=C(OC)C=C4)C(C(=O)NC5=CC=CN=C5)=C(C)NC3=N2	3	4	1	-5.02127	-4	-5.57127
CC1=CC(C)=C(NC(=O)CN2C=C(C(=O)C3=CC=CO3)C4=C2C=CC=C4)C=C1	1	1	1	-6.07127	-5.17127	-6.22127
C[C@H](CCC(O)=O)[C@H]1CC[C@H]2[C@@H]3[C@H](O)C[C@@H]4C[C@H](O)CC[C@]4(C)[C@H]3C[C@H](O)[C@]12C	2	2	4
C[C@H](CCC(O)=O)[C@H]1CC[C@H]2[C@@H]3[C@H](O)C[C@@H]4C[C@H](O)CC[C@]4(C)[C@H]3CC[C@]12C	4			-4	-4	-4.47127
CC1=C(O)C(C=O)=C(CO)C=N1	4	4		-4	-4	-4
C[C@H]1O[C@H](C[C@H](O)[C@@H]1O)O[C@H]2[C@@H](O)C[C@H](O[C@H]3[C@@H](O)C[C@H](O[C@H]4CC[C@@]5(C)[C@H](CC[C@@H]6[C@@H]5CC[C@]7(C)[C@H](CC[C@]67O)C8=CC(=O)OC8)C4)O[C@@H]3C)O[C@@H]2C	2	3	2	-4	-4	-4
OC[C@H]1O[C@](O)(CO)[C@@H](O)[C@@H]1O[C@@H]2O[C@H](CO)[C@H](O)[C@H](O)[C@H]2O	3			-4.21063	-4	-4
NS(=O)(=O)CC1=NOC2=C1C=CC=C2	4	4	4	-4	-4	-4
CC(=O)OCC(=O)[C@@]1(O)[C@@H](C[C@H]2[C@@H]3CCC4=CC(=O)C=C[C@]4(C)[C@@]3(F)[C@@H](O)C[C@]12C)OC(C)=O	1	1	1	-4	-4	-4
CCCCC(CC)COC(=O)C1=C(O)C=CC=C1	4	4	4	-4	-4	-4
ClC1=CC=C2C(CCC3=C(N=CC=C3)C2=C4CCNCC4)=C1	1	4	1	-4.96003	-4.96003	-5.01003
CCC[C@@H]1C[C@H](N(C)C1)C(=O)N[C@H]([C@@H](C)O)[C@H]2O[C@H](SC)[C@H](O)[C@@H](O)[C@H]2O	4	4		-4	-4	-4
CN1C2=C(N(CC3OCCO3)C=N2)C(=O)N(C)C1=O	4	4	4	-4	-4	-4
CC(C)CCC[C@@H](C)[C@H]1CC[C@@H]2[C@]1(C)CCC\C2=C/C=C3/C[C@@H](O)CCC3=C	4
CC1(C)[C@@H](N2[C@@H](CC2=O)S1(=O)=O)C(O)=O	3	4		-4	-4	-4
FC(F)(F)[C@]1(OC(=O)NC2=CC=C(Cl)C=C12)C#CC3CC3	4	4	3	-4.76003	-4.56003	-4.86003
NC1=NC(=O)N(C=C1)[C@H]2CS[C@@H](CO)O2	4	3	2	-4	-4	-4
COC1=CC(=CC=C1)[C@@]2(O)CCCC[C@@H]2CN(C)C	2	1	4	-4	-4	-4
CN(C\C=C\C#CC(C)(C)C)CC1=C2C=CC=CC2=CC=C1	1	1	1	-4.86003	-7.46003	-4.71003
CC[C@]12CC[C@H]3[C@@H](CCC4=CC(=O)CC[C@H]34)[C@@H]1CC[C@@]2(O)C#C	1	4	1	-4.91003	-4	-4.56003
[O-][N+](=O)C1=CC2=C(NC(=O)CN=C2C3=CC=CC=C3)C=C1	4	4	4	-4.36003	-4	-4.86003
CC(C)C1CCC(C)CC1OC(=O)C2=C(N)C=CC=C2	1		1	-5.57127	-4	-4.42127
CC(=O)OC1=CC=CC(C)=C1			4	-4	-4	-4
CC1OC(C)OC(C)O1		4	1	-4	-4	-4.36003
CC(C)C1=C(O)C=C(C)C=C1		4	2	-4	-4	-4
NC1=CC=C(N)C=C1	4	4	4	-4.81003	-5.51003	-6.11003
COC(=O)C1=CC=C(O)C=C1	4	4	4	-4	-4	-4
CC(C)(C)C1=CC=C(O)C=C1	2	4	1	-4	-4.51003	-5.11003
NNC1=CC=CC=C1	4	4	4	-4	-4.36003	-4.36003
CCCOC(=O)C1=CC=CC=C1	4	4	4	-4	-4	-4
CCCCCCCCCCCCSCCOCCO	1		1	-4.91003	-4.41003	-4.81003
CC(=O)NC1=CC=C(\C=N\NC(N)=S)C=C1	4	4	4	-4.56003	-4	-4
CC(=O)N[C@@H](CC1=CC=C(O)C=C1)C(O)=O	4		4	-4	-4	-4
NC(=O)NNC1=CC=CC=C1	4	4	2	-4.51003	-4	-4
COC1=CC(=CC(OC)=C1OC)C(=O)N2CCOCC2	4	4	2	-4	-4	-4
CN1N(C(=O)C(I)=C1C)C2=CC=CC=C2	4	4	1	-4	-4	-4
COC1=C(C=C(C(=O)C2=CC=CC=C2)C(O)=C1)S(O)(=O)=O	4		2	-4	-4	-4
NC(CO)(CO)CO	1			-4	-4	-4
C[C@]1(O)CC[C@H]2[C@@H]3CCC4=CC(=O)C=C[C@]4(C)[C@H]3CC[C@]12C	2	4	1	-4	-4	-4
C[C@]12CC[C@H]3[C@@H](CCC4=CC(=O)CC[C@H]34)[C@@H]1CC[C@@H]2O	3	4	2	-4	-4	-4
CC(=O)OC1=CC=C(C=C1)C2(C(=O)NC3=C2C=CC=C3)C4=CC=C(OC(C)=O)C=C4	1	1	1	-5.26003	-4	-4
NNC1=C2C=CC=CC2=C(NN)N=N1			4	-4	-4.64065	-4.61565
OC(=O)CCCCCCCCC=C	4		3	-4	-4	-4
CN1C(O)=NC(=O)C(C)(C1=O)C2=CCCCC2			4	-4	-4	-4
CCN(CC)CCOC(=O)C(O)(C1=CC=CC=C1)C2=CC=CC=C2	2	1	1	-4	-5.26003	-4.81003
CCCCNC(=O)NS(=O)(=O)C1=CC=C(N)C=C1	1	4	2	-4	-4	-4
OC(=O)C1=CC=CC=C1O			2
COC1=CC=C(\C=C\C(O)=O)C=C1	4	4	4	-4	-4	-4
CCN(CC)CCSC(=O)C(C1=CC=CC=C1)C2=CC=CC=C2	1	1	1	-4.86003	-5.26003	-4.76003
CCOC1=CC=C(C=C1)C(=O)OCCN(CC)CC	4	1	1	-4	-5.56565	-4
CCOC(=O)C1=C(N)SC2=C1CCN(CC3=CC=CC=C3)C2	1	1	1	-5.06003	-8.01002	-4.96003
FC1=CC2=C(OCC[C@]23NC(=O)NC3=O)C=C1	4	4	4	-4	-4	-4
CC(N(O)C(N)=O)C1=CC2=C(S1)C=CC=C2	4	4		-4.61003	-4	-4.86003
COC1=CC2=NC=NC(NC3=CC=C(F)C(Cl)=C3)=C2C=C1OCCCN4CCOCC4	2	1	1	-4	-5.31003	-4
CN1CCN(CC2=CC=C(C=C2)C(=O)NC3=CC=C(C)C(NC4=NC=CC(=N4)C5=CC=CN=C5)=C3)CC1	3	4		-4	-4	-4.76003
CC(C)C1=C(C(=O)NC2=CC=CC=C2)C(=C(N1CC[C@@H](O)C[C@@H](O)CC(O)=O)C3=CC=C(F)C=C3)C4=CC=CC=C4		4		-4	-4	-4.66003
COC1=C(C)C2=C(C(=O)OC2)C(O)=C1C\C=C(/C)CCC(=O)OCCN3CCOCC3	4	1	1	-4.96003	-4.86003	-5.91003
CC(C)(C)NC(=O)[C@@H]1CN(CC2=CC=CN=C2)CCN1C[C@@H](O)C[C@@H](CC3=CC=CC=C3)C(=O)N[C@@H]4[C@H](O)CC5=CC=CC=C45	1	3	1	-4.51063	-4.56565	-6.26565
CC(C)[C@H](NC(=O)N(C)CC1=CSC(=N1)C(C)C)C(=O)N[C@H](C[C@H](O)[C@H](CC2=CC=CC=C2)NC(=O)OCC3=CN=CS3)CC4=CC=CC=C4	1	1	1	-6.21003	-5.31003	-7.76003
CNC(C)CC1=C(OC)C=CC=C1		1	4	-4	-4.81003	-4
C[C@]12C[C@H](O)[C@H]3[C@@H](C[C@H](F)C4=CC(=O)C=C[C@]34C)[C@@H]1CC[C@]2(O)C(=O)CO	4	4	4	-4	-4	-4
OC1=C(Br)C=C(Br)C=C1C(=O)NC2=CC=C(Br)C=C2	3	2		-5.46003	-4.71003	-5.46003
OC(=O)CC1=CC=CC=C1	3	4	2	-4	-4.81003	-4
O=C(OC1=CC=CC2=C1N=CC=C2)C3=CC=CC=C3	1	1	1	-4	-4	-4
COC(=O)C1=CN=CC=C1	4		3	-4	-4	-4
CC(C)=CCOC1=CC=C(\C=C\C(=O)C2=C(OCC(O)=O)C=C(OCC=C(C)C)C=C2)C=C1	1	2	1	-4.81003	-4.51003	-4.66003
OC(=O)CNC(=O)C1=CC=CC=C1	3	2	4	-4	-4	-4
CC(N)C12CC3CC(CC(C3)C1)C2	4	2	4	-4	-4	-4
CC(C)CC1NC(=S)N(CC=C)C1=O	3	2	2	-4.62127	-5.17127	-5.57127
ClC1=C(Cl)C(=CC=C1)N2CCN(CCCCOC3=CC4=C(CCC(=O)N4)C=C3)CC2	2	1	1	-4.91003	-5.51003	-4
CN(CC1=CC=C(C=C1)C(C)(C)C)CC2=C3C=CC=CC3=CC=C2	1	1	1	-4.61003	-6.91003	-4.96003
CN1CCN(CC1)C(=O)O[C@@H]2N(C(=O)C3=C2N=CC=N3)C4=NC=C(Cl)C=C4	3	2	4	-4	-4.71003	-4
CC(C)N(CC[C@H](C1=CC=CC=C1)C2=CC(C)=CC=C2O)C(C)C	4	1	1	-4	-5.64065	-5.01565
CC1=C(N2[C@H](SC1)[C@H](NC(=O)[C@H](N)C3=CC=CC=C3)C2=O)C(O)=O	4	4	4	-4	-4	-4
C1CN(CCN1)C2=CC=CC3=C2OCCO3	2	1	3	-4	-4	-4
CC4(CN1CCC(CC1)N2C(=O)NC3=C2C=CC=C3)OCC5=C(C=CC=C5)N6C=CC=C46	1	1	1	-5.01003	-5.86003	-5.76003
CN1C2=C(C=CC=C2)C(=N[C@H](NC(=O)C3=CC4=C(N3)C=CC=C4)C1=O)C5=CC=CC=C5	2	4	1	-5.56003	-4	-4
OP(O)(=O)CN1C(=O)C(=O)NC2=C1C=C(N3CCOCC3)C(=C2)C(F)(F)F	4	4	4	-4	-4	-4
COC(=O)[C@@H]1CC2=CC(=O)CC[C@]2(C)[C@@]34O[C@@H]3C[C@@]5(C)[C@@H](CC[C@@]56CCC(=O)O6)[C@H]14	4	4	3	-4	-4.41003	-4
CN(C)CCC1=CC=C(O)C=C1	4	4	4	-4	-4	-4
COC1=C(O)C=CC(=C1)C(=S)N2CCOCC2	4	4	4	-4	-4	-4
CC(=O)NC(=O)C1=C(O)C=CC=C1	3	4	4	-4	-4	-4
CCCCN1CCCC1C(=O)NC2=C(C)C=C(C)C=C2C	1	1	1	-4	-5.41003	-5.11003
NC1=CC=C(C=C1)S(=O)(=O)NCC2=CC=CC=C2	4	4	2	-4	-4	-4.51003
SCC(=O)NC1=CC=CC=C1	1	1	1	-5.31003	-4.51003	-4.71003
CC=C\C=N\NC(=O)C1=CC=NC=C1	4	4	3	-5.91003	-4.96003	-5.11003
NC1=CC=C(C=C1)C(=O)NC2=C(N)C=CC=C2	4	4	4	-4	-4	-4
C[N+](C)(C)CCOC(=O)C(O)(C1=CC=CC=C1)C2=CC=CC=C2	4	4		-4	-4.81003	-4
CN1CCN(CC1)C2=NC3=C(SC4=C2C=C(Cl)C=C4)C=CC=C3	1	1	1	-4	-4.81003	-5.01003
CN1CCN(CC1)C2=NC3=C(CC4=C2C=CC=C4)C=CC(F)=C3	2	1	1	-4	-5.26003	-4.56003
CN(C)CCN1C2=C(C=CC=C2)N(C)C3=C(C=CC=C3)C1=O	4	2	1	-4	-4.46003	-4
COC1=CC=C(C=C1)C(=O)C2=C(C)N(CCN3CCOCC3)C4=C2C=CC=C4	1	1	1	-5.26003	-4.91003	-5.81003
NC1=NC(=NC(N)=N1)C2=C(Cl)C=CC(Cl)=C2	4	3	4	-4	-4	-4
NC(=N)NC1=CC=C(C=C1)C(=O)OC2=CC3=C(C=C2)C=C(C=C3)C(N)=N	1	4	4	-4	-4	-4
CNC1=C2CCCCC2=NN1C	4	4	4	-4	-4	-4
OC(=O)C(CC1=CC(I)=C(O)C(I)=C1)C2=CC=CC=C2	3	4	4	-4.89065	-4	-4.74065
CCC1=C(C(=O)C2=CC(I)=C(O)C(I)=C2)C3=CC=CC=C3O1	1	4	2	-6.46003	-4.46003	-4.81003
CC(CC1=CC=CC=C1)NC=O		4		-4	-4.42127	-4
OC1=C2N=CC=CC2=C(C=C1I)S(O)(=O)=O	4	4	2	-4	-4	-4
CN(C)CCOC(=O)C1=CC=C2N(CC3=CC=CC=C3)C(C)=C(C)C2=C1	2	3	1	-4.91003	-4.86003	-4.86003
CC1=NC2=C(C=CC=C2)N1CC3=CC=C(Cl)C=C3	2	3	1	-4.96003	-5.11003	-4.61003
CC1=CC=CC(C)=C1NC(=O)CN2CCCCCC2	3	1	3	-4	-4.96003	-4
COC1=CC2=C(C=C1OC)C3CC(=O)C(CC(C)C)CN3CC2	1	1	1	-4.81003	-5.01003	-4
CC(C)(N)CC1=CC=C(Cl)C=C1	4	4	4	-4	-5.21003	-4
CCCCNCC(O)C1=CC=C(O)C=C1	4	2	4	-4	-5.02127	-4
CC(CC1=CC=CC=C1)NCC2=C(Cl)C=CC=C2	1	1	1	-4.56003	-6.81003	-6.46003
ClC1=CC=C(CN2C=C(C(=O)C(=O)NC3=CC=NC=C3)C4=CC=CC=C24)C=C1	2	3	1	-6.52127	-4	-6.97127
O=C(CN1CCNCC1)NC2CCCCC2	4	4	3	-4	-4	-4
COC(=O)C1=C(C)NC(C)=C(C1C2=C(OC(F)F)C=CC=C2)C(=O)OC	2	4	1	-5.96003	-4	-4
NC1=NN=NN1C2=CC=CC=C2	4	3	2	-6.56003	-4	-4
CCN(CC)S(=O)(=O)C1=CC=C(C=C1)C(O)=O	4	4	4	-4.56003	-4	-4
C(CC1=CC=CC=C1)NC2=NC(=CS2)C3=CC=CC=C3	1	1	1	-5.26003	-5.26003	-5.36003
CC1=CC=CC(C)=C1NC(=O)CN2CCCC2	4	1	3	-4	-4.91003	-4
OC(=O)CC1=CN(N=C1C2=CC=C(Cl)C=C2)C3=CC=CC=C3	1	4	1	-5.36003	-4	-4
COC1=CC=C(C=CC(=O)C2=C(OC)C=C(OC)C=C2)C=C1	1	1	1	-5.36003	-4.86003	-5.51003
CC(C)NCC(O)C1=CC=C(C=C1)[N+]([O-])=O	4	4	2	-4	-4.61003	-4
NS(=O)(=O)C1=CC(=C(Cl)C=C1)S(N)(=O)=O	4	4	4	-4	-4	-4
CC(C)C(Br)C(=O)NC(N)=O	4		4	-4	-4	-4
BrC1=C(Br)C=C(S1)C(=O)NC2=CC=C(Br)C=C2	1	4	1	-4.67127	-5.02127	-5.12127
OC(=O)CC1=CSC(=N1)C2=CC=C(Cl)C=C2	4	4	2	-4	-4	-4
CC(=O)NC1=CC=C(CC(O)=O)C=C1	4	4	3	-4	-4	-4
CC(C)CC1=CC=C(CC(O)=O)C=C1	4	4	4	-4	-4	-4
CC1=CC(CC(O)=O)=C(C)N1C2=CC=C(Cl)C=C2			1	-4.66003	-4	-4
O=C(NCN1CCOCC1)C2=NC=CN=C2	4		4	-4	-4	-4
OC(=O)CNC(=O)C1=C(I)C=CC=C1	4		2	-4	-4	-4
CC(C)(C)C(=O)NCCCC(O)=O	4	4	4	-4	-4	-4
CCNC(=O)NCC1=CC(Cl)=CC=C1	4	4	2	-4	-4	-4.46003
CNCC(=O)C1=CC(O)=C(O)C=C1	4	2	1	-4	-4	-4
OCCN1CCN(CCC(=O)N2C3=C(SC4=C2C=C(C=C4)C(F)(F)F)C=CC=C3)CC1	3	4	1	-4	-4	-4.86003
COC1=C(NS(=O)(=O)C2=CC=C(N)C=C2)N=CC=N1	4	4	4	-4	-4	-4
CN1CCN(CCC(=O)N2C3=C(SC4=C2C=C(C=C4)C(F)(F)F)C=CC=C3)CC1	3	4	1	-4	-7.46003	-5.11003
CCN(CC)CCOC1=C(C=CC=C1)C(=O)CCC2=CC=CC=C2	3	1	1	-4	-6.96003	-4.51003
NNC(=O)CP(=O)(C1=CC=CC=C1)C2=CC=CC=C2	4	4	4	-4.81003	-4	-5.01003
NC1=NC(NC2=CC=CC=C2)=NC=N1	4	4	1	-4	-4	-4
COC1=CC(=CC(OC)=C1OC)C(=S)N2CCOCC2	4	4	2	-4	-4	-4
O[C@H]1CO[C@@H]2[C@H](O)CO[C@H]12	4	4	4	-4	-4	-4
COC1=C(OC)C(=O)C(CCCCCCCCCCO)=C(C)C1=O	1	1	1	-5.11003	-5.41003	-6.31003
COC1=C(OC)C=C(CC2=C(N)N=C(N)N=C2)C=C1	4	4	4	-4	-4	-4
CC1=[N+]([O-])C=C(N=C1)C(O)=O		4	4	-4	-4	-4
CCN(C(C)=O)C1=CC(=CC=C1)C2=CC=NC3=C(C=NN23)C#N	4	4	3	-4.61003	-4	-4
CCOC1=CC(N)=C(Cl)C=C1C(=O)NCC2CN(CC3=CC=C(F)C=C3)CCO2	1	1	1	-4	-4.81003	-6.36003
ClC1=C(NC2=NCCN2)C3=NSN=C3C=C1	4	1	4	-4	-4.76003	-4
CCC1NC2=CC(Cl)=C(C=C2S(=O)(=O)N1)S(N)(=O)=O	4	4	4	-4	-4	-4
CC1=C(COC(C)(C)C(O)=O)OC(=N1)C2=CC=C(Cl)C=C2	4	4	3	-4	-4	-4
CC1=C(Cl)C(=O)OC2=C1C=CC(OP(=O)(OCCCl)OCCCl)=C2	1	3	2	-5.91003	-5.81003	-4
C(CN1CCOCC1)CC2=CC=C(COC3=CC=CC=C3)C=C2	1	1	1	-4	-5.16003	-4.81003
O=C(C(C1=CC=CC=C1)C2=CC=CC=C2)C3C(=O)C4=C(C=CC=C4)C3=O	2	4		-6.41565	-4.71565	-4.61063
OC1=C(Cl)C=C(Cl)C=C1S(=O)C2=C(O)C(Cl)=CC(Cl)=C2		4	1	-4.51003	-4.56003	-5.51003
OC1=C(C=C(C=C1[N+]([O-])=O)[N+]([O-])=O)C(=O)N\N=C\C2=CC=C(O2)[N+]([O-])=O	4	1	1	-4	-6.21003	-6.61003
CC(=O)NC1=CC=C(OCCOCCOC2=CC=C(NC(C)=O)C=C2)C=C1	3	4	4	-5.46003	-4	-4.41003
CC1=NC2=C(O)C(Br)=CC(Br)=C2C=C1	1	1		-4	-4	-4
CCCCCCOC(=O)C1=CN=CC=C1	1	1	1	-4.82127	-4.97127	-4.62127
CCN1CCCC1=O	4	4	4	-4	-4	-4
OC(=O)[C@@H]1CCC(=O)N1	2	3	4	-4	-4	-4
CC(C)CCC[C@@H](C)CCC[C@@H](C)CCC[C@]1(C)CCC2=CC(O)=CC(C)=C2O1	3		2	-4	-4	-4
CCCCC(CC)COC(=O)C=CC1=CC=C(OC)C=C1		4	4	-5.01003	-4	-4.81003
CCOC1=C(C=CC(NC(C)=O)=C1)C(=O)OC	4	4	2	-4	-4	-4.76003
C[C@@H]1O[C@@H](OC[C@H]2O[C@@H](OC3=C(OC4=CC(O)=CC(O)=C4C3=O)C5=CC=C(O)C(O)=C5)[C@H](O)[C@@H](O)[C@@H]2O)[C@H](O)[C@H](O)[C@H]1O	4	4	4	-4	-4	-4
COP(=S)(OC)OC1=CC=C(C=C1)S(=O)(=O)N(C)C	4	2	1	-6.21003	-4	-4.96003
CC(C)(C)OC(=O)C1=C2[C@@H]3CCCN3C(=O)C4=C(Br)C=CC=C4N2C=N1	4	4	4	-5.36003	-4	-4.41003
CN1C2=C(C=C(Cl)C=C2)C(=NCC1=S)C3=CC=CC=C3	2	2	1	-4.91003	-4.56003	-4.91003
CCC(C(=O)OCCOCCN(CC)CC)C1=CC=CC=C1	4	1	2	-4	-4.96003	-4
ClC1=CC=C(NC(=O)C2CC2)C=C1Cl	4	4	4	-4.46003	-4	-4
OC1=C(\C=N\NC(=O)C2=CC=NC=C2)C=CC=C1	3	1	3	-5.36003	-4.36003	-4.41003
CC1=CC=C(C=C1)S(=O)(=O)NC(=O)NC2CCCCC2	1	4	4	-4.71003	-4	-4
NS(=O)(=O)C1=CC=C(NC(=O)CCC(O)=O)C=C1	2		4	-4	-4	-4
COC1=CC=C(C=C1)S(=O)(=O)NC2=NN=C(CC(C)C)S2	1	4	4	-4.66003	-4	-4
CCOC(=O)C1=CC=C(O)C=C1	4	4	4	-4	-4	-4
[O-][N+](=O)C1=CN=C(NC(=O)C2=CC=CS2)S1	1	4	2	-5.01003	-4.86003	-5.01003
COC1=C(OC)C=C(\C=N\NC(=O)C2=CC=NC=C2)C=C1	4	4	2	-4.91003	-4.66003	-4.96003
COC1=CC2=C(C=C1)N=C(NC(=O)NC3=CC=CC=C3)S2	1	1	4	-4.86003	-4	-5.06003
CC1=C(CN2C=CN=C2)C3=C(C=CC=C3)N1CCC(O)=O	3	4	3	-5.71003	-4.56003	-4.66003
CNC(=N)NC(=O)NC1=C(C)C=CC=C1C		2	4	-4	-4	-4
COC([C@H](OC1=NC(C)=CC(C)=N1)C(O)=O)(C2=CC=CC=C2)C3=CC=CC=C3	4	4	3	-4	-4	-4.41003
CN1CCC(O)(C(C1)C(=O)C2=CC=C(F)C=C2)C3=CC=C(F)C=C3	1	1	2	-4	-4.61003	-4.41003
OC1=C2N=CC=CC2=C(C=C1)[N+]([O-])=O	4	4	3	-4	-4	-4.41003
O=C(CCN1CCC(C1)C2=CC=CC=C2)C3=CC4=C(OCCO4)C=C3	3	1	3	-4	-6.01003	-4
CCC1=NN=C(N[S+]([O-])(=O)C2=CC=C(N)C=C2)S1	4	4	4
NC1=CC=C(C=C1)S(=O)(=O)NC2=CC=CC=C2	4	3	4	-4	-4	-4.56003
CN1CCN(CC1)C(=O)C2CCCCC2	3	4	4	-4	-4	-4
CCOC(=O)C1=C(C)N(C)C2=C1C=C(O)C=C2	3	4	2	-4	-4.46003	-5.16003
CCN(CC)CCOC(=O)C(C)(C1=CC=CC=C1)C2=CC=CC=C2	1	1	1	-5.41003	-5.86003	-6.01003
OC(C#CCN1CCCC1)(C2=CC=CC=C2)C3=CC=CC=C3	1	1	1	-5.06003	-4.91003	-5.26003
O=C(CN1CCN(CC2=CC3=C(OCO3)C=C2)CC1)N4C5=C(SC6=C4C=CC=C6)C=CC=C5	1	1	1	-5.11003	-6.71003	-6.31003
[O-][N+](=O)C1=CC(=CC=C1)S(=O)(=O)NCCNS(=O)(=O)C2=CC=CC(=C2)[N+]([O-])=O		4	1	-5.51003	-4	-5.41003
CCCOC(=O)C1=CC=C(N)C=C1	3	3	2	-4.41003	-4	-4.36003
CC(C)COC(=O)C1=CC=C(N)C=C1	3	3	3	-4.76003	-4.71003	-4.71003
CC1=CC=CC(C)=C1NC(=O)C2=C(C=CC=C2)C(O)=O	4	3	4	-4	-4	-4
CCN1CCC[C@H]1CNC(=O)C2=C(OC)C(Cl)=CC(CC)=C2O	1	1	1	-4	-6.66003	-4
CN1C=C(\C=C2/C(=O)NC3=CC=CN=C23)C4=C1C=CC=C4	2	3	1	-4	-4.62127	-5.72127
COC1=CC2=C(C=C1OC)C(=NCC2)C(C(=O)N(CCC3=C(OC)C(OC)=C(OC)C=C3)CCC4=C(OC)C(OC)=C(OC)C=C4)C5=CC=CC=C5	1	1	1	-5.36003	-4.91003	-6.41003
COC(=O)C(CN)C1=CNC2=CC=C(OC)C=C12	4	2	3	-4	-8.22127	-4.57127
CCC1=C(O)C=C(O)C(=C1)C2=NNC(C)=C2C3=CC4=C(OCCO4)C=C3	1	2	2	-6.12127	-5.37127	-5.97127
CN1[C@H]2CC[C@@H]1CC(C2)OC(=O)C3=CNC4=C3C=CC=C4	4	1	4	-4	-4.91565	-4.23563
CCC1=CC=C(OCC2=C(C=CC=C2)C(=O)NC3=CC4=C(C=C3)N=C(C)C=C4N)C=C1	4	1	1	-4.57127	-6.67127	-4.97127
COC1=CC(NCC2=C(C)C3=C(C=C2)N=C(N)N=C3N)=CC(OC)=C1OC	4		1	-4.91003	-5.16003	-6.41003
COCC(=O)O[C@]3(CCN(C)CCCC1=NC2=C(N1)C=CC=C2)CCC4=C(C=CC(F)=C4)[C@@H]3C(C)C	4	1	1	-4	-7.31003	-7.81003
CN1CCC(CC1)NC2=NC=C3N=CN=C(NC4=CC(Cl)=C(F)C=C4)C3=N2	3	4	4	-4	-4.81003	-4
CC1=C(O)C(C)=C2CCC(C)(COC3=CC=C(CC4SC(=O)NC4=O)C=C3)OC2=C1C	1	4	1	-5.16003	-4.41003	-5.96003
CSC1=CC=C(\C=C2\C(C)=C(CC(O)=O)C3=C2C=CC(F)=C3)C=C1	2	3	1	-4	-4.41003	-4.81003
C[C@@H]1[C@H]2[C@H](O)[C@H]3[C@H](N(C)C)C(O)=C(C(N)=O)C(=O)[C@@]3(O)C(O)=C2C(=O)C4=C1C=CC=C4O	4	4	3	-4	-4	-4.41003
COC1=C2OC3=CC=C(C[C@@H]4N(C)CCC5=C4C(OC6=C(OC)C=C7CCN(C)[C@H](CC(C=C1)=C2)C7=C6)=C8OCOC8=C5)C=C3	4	4	1	-4.46003	-4.76003	-5.56003
C[C@@H]1CC[C@H]2[C@@H](C)C(=O)O[C@@H]3O[C@@]4(C)CC[C@@H]1C23OO4	4	3	3	-4	-4	-4
CC(C)C[C@H](NC(=O)[C@H](C)NC(=O)C[C@H](O)[C@H](CC(C)C)NC(=O)[C@@H](NC(=O)[C@@H](NC(=O)CC(C)C)C(C)C)C(C)C)[C@@H](O)CC(O)=O	2	4	4	-4	-4	-4
CC1=CC(C)=C(C(C)=C1)[S+]([O-])(=O)NC2=CC=CC3=C2N=CC=C3	1	3	1	-4.57127	-4.57127	-5.32127
O[C@H]([C@H]1CCCCN1)C2=C3C=CC=C(C3=NC(=C2)C(F)(F)F)C(F)(F)F			1	-4.36003	-5.06003	-4.86003
CN(C)CCCO[C@H]1[C@H](O[C@@H]2OC(C)(C)O[C@H]12)[C@H](O)CO	4	4	4
OCCN1CCN(CCCN2C3=C(C=CC=C3)C=CC4=C2C=CC=C4)CC1	1	1	1	-4	-4.86003	-4
[O-][S+](=O)(NCCNC\C=C\C1=CC=C(Br)C=C1)C2=CC=CC3=CN=CC=C23	1	4	1	-5.22127	-5.32127	-5.87127
CC(N)C(=O)NC1=C(C)C=CC=C1C	1	4	1	-4	-4	-4
COC(=O)[C@@H](N)CC1=CC(O)=C(O)C=C1	4		2	-4	-4	-5.16003
CN(C)[C@H]1[C@@H]2C[C@@H]3[C@H](O)C4=C(Cl)C=CC(O)=C4C(=O)C3=C(O)[C@]2(O)C(=O)C(C(N)=O)=C1O	2	4	4	-4.41003	-4	-4
COCCOC(=O)C1=C(C)NC(C)=C(C1C2=CC(=CC=C2)[N+]([O-])=O)C(=O)OC\C=C\C3=CC=CC=C3	3	4	1	-7.21003	-5.01003	-6.41003
OCCN1CCN(CC\C=C2/C3=CC(=CC=C3SC4=C2C=CC=C4)C(F)(F)F)CC1	3	1	1	-4.41003	-5.16003	-5.06003
CCC1=C(C)NC2=C1C(=O)C(CN3CCOCC3)CC2	4	1	3	-4	-5.16003	-5.36003
OC1=CC2=C(C[C@@H]3[C@@H]4CCCC[C@]24CCN3CC=C)C=C1	4	4	2	-4	-5.96003	-4
CCCN1CCC[C@@H]2CC3=C(C[C@@H]12)C=NC(N)=N3	2	4	1	-4	-5.01003	-4
CC1=C(C=C(C#N)C(=O)N1)C2=CN3C=CN=C3C=C2	1	3	1	-4	-4	-4
ClC1=CC=C(C=C1)C2=C(\C=N\OCC3=CC=C(Cl)C(Cl)=C3)N4C=CSC4=N2	1	4	1	-5.42127	-4	-5.22127
N[C@@H](CC1=CC(I)=C(O)C(I)=C1)C(O)=O	4	4	1	-4.81003	-4.66003	-4
CC(=O)[C@H]1CC[C@H]2[C@@H]3CC=C4C[C@@H](O)CC[C@]4(C)[C@H]3CC[C@]12C	1		1	-4	-4	-6.91003
COC1=C(C)C(C)=C(\C=C\C(C)=C\C=C\C(C)=C\C(O)=O)C(C)=C1	1	4	1	-4.62127	-4	-4.92127
CCC1=CN=C(CCOC2=CC=C(CC3SC(=O)NC3=O)C=C2)C=C1	1	4	2	-4.56003	-4	-4.41003
CC(C)(C)NCC(O)C1=CC(Cl)=C(N)C(Cl)=C1	4	1	4	-4	-4.46003	-4
CN1CCCCC1CCN2C3=CC(=CC=C3SC4=C2C=CC=C4)S(C)=O	3	1	3	-4	-7.66003	-4
NC1=NC2=C(CCN(CC=C)CC2)S1	4	2		-4	-4	-4
CN(C)S(=O)(=O)N[C@H]1C[C@H]2[C@@H](CC3=CN(C)C4=CC=CC2=C34)N(C)C1	4	1	4	-4	-5.66003	-4
CN1CCC(CC1)=C2C3=C(CCC4=C2C=CC=C4)SC=C3	3	1	1	-4	-5.96003	-4
CN([C@H]1CC[C@@]2(CCCO2)C[C@@H]1N3CCCC3)C(=O)CC4=CC=CC=C4	4	1	3	-4	-5.11003	-4.41003
CC(O)CCCCN1C(=O)N(C)C2=C(N(C)C=N2)C1=O	4	4	4	-4	-4	-4.41003
NC1=NC=NC2=C1N=CN2[C@@H]3O[C@H](COP(O)(O)=O)[C@@H](O)[C@H]3O	4	4	4	-4	-4	-4
COC(=O)[C@@H](N1CCC2=C(C1)C=CS2)C3=C(Cl)C=CC=C3	1	1	1	-5.11003	-4.76003	-4.76003
O=C1C2=C(N\C1=C3\NC4=C(C=CC=C4)C3=O)C=CC=C2	1		4	-4	-4	-4.41003
C\C1=C/CC[C@@]2(C)O[C@@H]2[C@H]3OC(=O)C(=C)[C@@H]3CC1	4	1	1	-4	-4	-4.62127
CO[C@]12[C@H]3N[C@H]3CN1C4=C([C@H]2COC(N)=O)C(=O)C(N)=C(C)C4=O		2	3	-4	-4.91003	-5.16003
CCCCCCCCOC1=C(C=CC=C1)C(=O)NC2=CC=C(C=C2)C(=O)OCC[N+](C)(CC)CC		1		-5.81003	-4.76003	-5.46003
C[C@H]([C@H](O)CCC(C)(C)O)[C@H]1CC[C@@]2(O)C3=CC(=O)[C@@H]4C[C@@H](O)[C@@H](O)C[C@]4(C)[C@H]3CC[C@]12C	4
C[C@H]1COC2=C1C(=O)C(=O)C3=C2C=CC4=C3CCCC4(C)C	1			-4.72127	-4.62127	-5.02127
CSCC[C@@H](NC(=O)[C@@H](CC1=CC=CC=C1)NC(=O)CNC(=O)CNC(=O)[C@@H](N)CC2=CC=C(O)C=C2)C(O)=O	1	1	1	-4	-4	-4
NCCNC1=C2C=CC=CC2=CC=C1	4	1	4	-4.61003	-5.11003	-4.36003
[O-][N+](=O)\N=C1/NCCN1CC2=CN=C(Cl)C=C2	4	4	4	-4	-4	-4
COCC(=O)N(C(C)C(=O)OC)C1=C(C)C=CC=C1C	4	4	1	-4	-4	-4
ClC1=CC(Cl)=C(C=C1)C(CN2C=CN=C2)OCC=C	4	1	1	-6.16565	-5.54065	-6.44065
CC(C)=C[C@@H]1[C@@H](C(=O)OCC2=COC(CC3=CC=CC=C3)=C2)C1(C)C	1	1		-5.11003	-4	-5.11003
OCCOCCOCCO	4	4	3	-4	-4	-4
NC1=NC(NC2CC2)=NC(N)=N1	4	3	4	-4	-4	-4
COP(=S)(OC)OC1=CC(Cl)=C(Cl)C=C1Cl	1		1	-5.16003	-4	-4
COP(=S)(OC)OC1=CC=C(SC2=CC=C(OP(=S)(OC)OC)C=C2)C=C1	1	2	1	-4.81003	-4	-5.11003
COCC(C)N(C(=O)CCl)C1=C(C)SC=C1C	2	4	1	-4.87127	-4	-4
OC(CC(C1=CC=CC=C1)C2=C(O)C3=C(OC2=O)C=CC=C3)C4=CC=C(C=C4)C5=CC=C(Br)C=C5	1	4	2	-5.36003	-4.41003	-5.26003
ClC1=CC=C(NC(=O)NC2=CC(Cl)=C(Cl)C=C2)C=C1	3		4	-5.36003	-4	-4
OCC(Br)(CO)[N+]([O-])=O	1		4	-5.17127	-4	-4
CC(C)(C)CC(C)(C)C1=CC=C(O)C=C1	4		4	-4.9011	-4.4411	-4.7111
OC1=CC=C(C=C1)C(=O)OCC2=CC=CC=C2	4	4	4	-4	-4.56003	-4.81003
CCCCCCCCOC1=CC(O)=C(C=C1)C(=O)C2=CC=CC=C2	1	2	1	-4	-4	-4
CCCOC(=O)C1=CC(O)=C(O)C(O)=C1	2	4	1	-4	-4.62127	-5.77127
OC[C@@H](O)[C@@H](O)[C@H](O)[C@H](O)CO	4	4	4	-4	-4	-4
CC1=[N+]([O-])C2=C(C=CC=C2)[N+]([O-])=C1C(=O)NCCO	3	1	4	-4	-4	-4
CCCCCCCC\C=C/CCCCCCCCN		1	4	-4.71003	-6.26003	-4
CC(O)CN(CCN(CC(C)O)CC(C)O)CC(C)O	4	4	4	-4	-4	-4
CCCCCCCCCCCCCCCC(O)=O	4		4	-4	-4	-4.36003
CCN(CC)CCOC1=CC=C(C=C1)C(=C(Cl)C2=CC=CC=C2)C3=CC=CC=C3	1	1	1	-4.41003	-5.86003	-4.81003
COC1=CC=C(C=C1)C(=O)N2CCN(CC(=O)N3CCOCC3)CC2	4	4	4	-4	-4	-4
CN(C)CCOC(=O)C1=CC=C2N(CCN(C)C)C(C)=C(C)C2=C1	4	3	4	-4	-4	-4
COC1=CC(C=C2CCCC(=CC3=CC(OC)=C(O)C=C3)C2=O)=CC=C1O	1	1	1	-4.41003	-4.41003	-4.86003
NC1=NC(N)=C(S1)C2=CC=CC=C2	4	4	3	-4	-4.56003	-4.56003
CC1=CC=CC(C)=C1NC(=O)CN(CC(O)=O)CC(O)=O	4	4	4	-4	-4	-4
CC1=NC(C)=NC(NS(=O)(=O)C2=CC=C(N)C=C2)=C1	3	4	4	-4	-4	-4.53563
CC(=O)NC1=NC=C(S1)[N+]([O-])=O	4		4	-4	-4.36003	-4.71003
NC(=S)N\N=C\C1=CN=CC=C1	4	4	2	-4	-4.61003	-5.66003
CC1=CC=C(C=C1)S(=O)(=O)NC(=O)NC2CCCCCCC2	1	4	2	-4.76003	-4	-4.41003
CC1=CC=C(C=C1)S(=O)(=O)NC(=O)NC2CCCC2	1	4	3	-4	-4	-4
CC(=O)N\N=C\C1=CC=C(O1)[N+]([O-])=O	4	1	3	-4	-4.81003	-6.01003
NC(=O)C(=O)N\N=C\C1=CC=C(O1)[N+]([O-])=O	2	1	1	-4	-5.21003	-5.91003
CCCCCCCCCCCCCCNCCO	3	1	4	-4	-5.21003	-4.86003
CC1=C2C=CC=NC2=C(O)C=C1	1	2	1	-4	-4	-4
OCCNC(=O)\C=C\C1=CC=CC=C1	4		4	-5.26003	-4.91003	-5.06003
COC1=C(OC(=O)OC2=C(OC)C=CC=C2)C=CC=C1	1	1	1	-4	-4	-4
OC(=O)C1=C(O)C=C(NC(=O)C2=CC=CC=C2)C=C1	4	4	4	-4.51003	-4.86003	-4.46003
ClC1=CC=C(C=C1)C(=O)NCCCN2CCOCC2	4	1	4	-4	-5.56565	-4
CN1C(=O)\C(=N/NC(N)=S)C2=CC=CC=C12	4	4	4	-5.02127	-5.57127	-5.42127
CCN(CC)CCNC(C(=O)OCCC(C)C)C1=CC=CC=C1	1	1	3	-4	-6.11003	-5.06003
CCCCCCCCCCCC(=O)OCC(O)CO		1		-4.67127	-4.57127	-4.72127
CCCCCCCCCCCCCCCCCC(=O)OCC(O)CO	1			-4	-4	-4
CCNC(=O)\C=C\C1=CC(Br)=CC=C1	4	3	4	-4	-4	-4
CCC(=O)NC1=CC=C(O)C=C1	4	3	4	-4	-4	-4
CCCCNC(=N)NC(N)=N	4	4	3	-4	-4.46003	-4
OC1=CC=C(C=C1)S(O)(=O)=O	1	4	4	-4	-4	-4
CC1NCCOC1C2=CC=CC=C2	4	4	1	-4	-4.61003	-4
CCN(CC)CCNC(=O)COC1=CC=C(Cl)C=C1	4	1	4	-4	-4.86003	-4
NC(=O)NS(=O)(=O)C1=CC=C(N)C=C1	4	4	3	-4	-4	-4
CC(C)(C)NCC(O)COC1=CC=C(NC(=O)NC2CCCCC2)C=C1	4	4	4	-4	-4	-4
COC1=C(OC)C(OC)=C(CN2CCN(CC2)C(C3=CC=C(F)C=C3)C4=CC=C(F)C=C4)C=C1	1	1	1	-4.96003	-5.66003	-4.61003
ClC1=C(C=CC=C1)C2CS\C(S2)=C(/C#N)N3C=CN=C3	1	1	2	-5.81003	-6.56003	-7.11003
C[C@@H](O)[C@@H]1[C@H]2SC([C@H]3CCCO3)=C(N2C1=O)C(O)=O		1		-4	-4	-4
COC1=C(CC2=CN(C)C3=C2C=C(NC(=O)OC4CCCC4)C=C3)C=CC(=C1)C(=O)NS(=O)(=O)C5=C(C)C=CC=C5	1	4	1	-4.86003	-4.56003	-5.56003
CN(CCOC1=CC=C(NS(C)(=O)=O)C=C1)CCC2=CC=C(NS(C)(=O)=O)C=C2	4	4	3	-4	-4.56003	-4.71003
CCN(CC)C(=O)C(\C#N)=C\C1=CC(O)=C(O)C(=C1)[N+]([O-])=O	1	2	3	-7.36003	-4	-5.01003
CN(C)CCOC(=O)C(OCC#C)(C1=CC=CC=C1)C2=CC=CC=C2	1	1	1	-6.11003	-5.81003	-5.76003
CNCC[C@H](OC1=CC=CC2=C1C=CC=C2)C3=CC=CS3	3	1		-4	-6.36003	-5.36003
NC1=NC2=C(N=CN2[C@@H]3C[C@H](CO)C=C3)C(NC4CC4)=N1	4	4	4	-4	-4.52127	-4.62127
CC(=O)N[C@@H]1[C@@H](NC(N)=N)C=C(O[C@H]1[C@H](O)[C@H](O)CO)C(O)=O	4	2		-4	-4	-4
NC1=NC2=C(N=CN2[C@H]3C[C@H](O)[C@@H](CO)C3=C)C(=O)N1	4	4	4	-4	-4	-4
O=C1[C@H]2CCCC[C@H]2C(=O)N1CCCCN3CCN(CC3)C4=NSC5=C4C=CC=C5	1	1	1	-4	-4.91003	-4.51003
CC(C)(O)C1=C(CC[C@@H](SCC2(CC([O-])=O)CC2)C3=CC(\C=C\C4=NC5=C(C=CC(Cl)=C5)C=C4)=CC=C3)C=CC=C1		1		-4	-4	-4.86003
CCCCCOC(=O)NC1=NC(=O)N(C=C1F)[C@@H]2O[C@H](C)[C@@H](O)[C@H]2O	4	4	4	-4	-4	-4
CC1=C(N(N=C1C(=O)NN2CCCCC2)C3=C(Cl)C=C(Cl)C=C3)C4=CC=C(Cl)C=C4	1	4		-4.61003	-4.91003	-4
CCN(CC)CCN1C2=C(C=C(Cl)C=C2)C(=NCC1=O)C3=C(F)C=CC=C3	4	1	1	-4	-4.86003	-5.81003
COCCOC1=CC2=NC=NC(NC3=CC(=CC=C3)C#C)=C2C=C1OCCOC	4	3	2	-4	-4	-5.46003
CC(C)[C@H](N1CCCNC1=O)C(=O)N[C@H](C[C@H](O)[C@H](CC2=CC=CC=C2)NC(=O)COC3=C(C)C=CC=C3C)CC4=CC=CC=C4	3	1	1	-4.76003	-4.86003	-6.96003
CN1C2=C(C=C(C=C2)[N+]([O-])=O)C(=NCC1=O)C3=CC=CC=C3	2	4	3	-4	-4	-4.86003
CC1=CC=C(C=N1)C2=C(C=C(Cl)C=N2)C3=CC=C(C=C3)S(C)(=O)=O	4	3	4	-4	-4.76003	-4.56003
CC(C)=CCC1C(=O)N(N(C1=O)C2=CC=CC=C2)C3=CC=CC=C3	4	4	4	-4	-4	-4.91003
CC1(C)S[C@@H]2[C@H](\N=C\N3CCCCCC3)C(=O)N2[C@H]1C(O)=O	4	4	3	-4	-4	-4
NC[C@H]1CC[C@@H](CC1)C(=O)OC2=CC=C(CCC(O)=O)C=C2	4	4	3	-4	-4	-4
COC(=O)C1=C(C=CC=C1)C(=O)C2=CC=C(OCCN3CCCCC3)C=C2	4	1	3	-4	-4.96003	-4
CC(C)OC(=O)C(C(=O)OC(C)C)=C1SC=CS1	1	1		-4.51003	-4.66003	-4.41003
C[C@]12CC[C@H]3[C@@H]([C@H]4C[C@H]4C5=CC(=O)CC[C@]35C)[C@@H]1[C@@H]6C[C@@H]6[C@@]27CCC(=O)O7	4	4	1	-4.31063	-4.64065	-4
CO[C@H]1O[C@@H]2O[C@@]3(C)CC[C@H]4[C@H](C)CC[C@@H]([C@H]1C)[C@@]24OO3	4		4
C[C@H](N[C@@H](CCC1=CC=CC=C1)C(O)=O)C(=O)N2CCC[C@H]2C(O)=O	4	4	2
CCOC(=O)O[C@@]1(CC[C@H]2[C@@H]3CCC4=CC(=O)C=C[C@]4(C)[C@H]3[C@@H](O)C[C@]12C)C(=O)OCCl	1	4	1	-4	-4	-4
OCC(CO)N[C@H]1C[C@](O)(CO)[C@@H](O)[C@H](O)[C@H]1O	1			-4	-4	-4
CCCN1CCCC[C@H]1C(=O)NC2=C(C)C=CC=C2C	4	3	1	-4	-5.31003	-4.41003
COC1=NC(=CC=C1)N(C)C(=S)OC2=CC=C3CCCCC3=C2	1	1	1	-4	-4	-5.76003
CC(CCC1=CC=C(O)C=C1)NCC(O)C2=CC=C(O)C=C2	4	1	3	-4	-5.17127	-4.42127
CC(C)(C)C1=CC=C(C=C1)C(=O)CCCN2CCC(CC2)OC(C3=CC=CC=C3)C4=CC=CC=C4	1	3	1	-4.86003	-4.86003	-4
CC(C)N1C(\C=C\[C@H](O)C[C@H](O)CC(O)=O)=C(C2=C1C=CC=C2)C3=CC=C(F)C=C3	1	4	2
CCOC(=O)OC(C)OC1=C(N(C)S(=O)(=O)C2=C1C=CC=C2)C(=O)NC3=NC=CC=C3	3	1	1	-4.41003	-4	-4
COC1=CC(=CC(OC)=C1OC)C(=O)N2CCCCCCC2	3	3	1	-4	-4	-5.06003
CC(C)C1=C(C)N(C)N(C1=O)C2=CC=CC=C2	4	4	4	-4	-4	-4
CC1SC2=C(C(O)=O)C(=O)C3=CC(F)=C(C=C3N12)N4CCN(CC5=C(C)OC(=O)O5)CC4	4	4	4	-4	-4	-4
COC1=CC=C(C=C1C23CC4CC(CC(C4)C2)C3)C5=CC=C6C=C(C=CC6=C5)C(O)=O	4		3	-4	-4	-4
CC(C)(C#N)C1=CC(=CC(CN2C=NC=N2)=C1)C(C)(C)C#N	4	4	2	-5.21003	-4	-5.01003
CC1CCC2=C3N1C=C(C(O)=O)C(=O)C3=CC(F)=C2N4CCC(O)CC4	4	4	2	-4	-4	-4
C[N+]3(CCC(C(N)=O)(C1=CC=CC=C1)C2=CC=CC=C2)CCCCC3	4	4	4	-4	-4.81003	-4
C[C@@H](C1=C(F)C=NC=N1)[C@](O)(CN2C=NC=N2)C3=C(F)C=C(F)C=C3	4	4		-5.01565	-4	-4.91565
CC(C)(C)C(=O)OCOP(=O)(COCCN1C=NC2=C1N=CN=C2N)OCOC(=O)C(C)(C)C	3	1	1	-4	-4	-5.41003
COCC1=C(N=C(C(C)C)C(\C=C\[C@@H](O)C[C@@H](O)CC([O-])=O)=C1C2=CC=C(F)C=C2)C(C)C		4		-4.51003	-4	-4.51003
CC1=C(SC=C1)C(=CCCN2CCC[C@H](C2)C(O)=O)C3=C(C)C=CS3	4	2	4	-4	-4	-4.41003
CCN(CC)CCNC(=O)C1=C(C)NC(\C=C2/C(=O)NC3=CC=C(F)C=C23)=C1C	4	4	1
C[C@@H]1CC2=C(CCC(=O)C2)[C@H]3CC[C@@]4(C)[C@@H](CC[C@@]4(O)C#C)[C@H]13	4	3	1	-4.66003	-4.41003	-4.56003
OC(=O)CCNC(=O)C1=CC=C(C=C1)\N=N\C2=CC(C(O)=O)=C(O)C=C2	4	4	3	-4	-4	-4
CN1C(=O)C=C(NCCN(CCO)CCCC2=CC=C(C=C2)[N+]([O-])=O)N(C)C1=O	4	4	1	-4	-4.81003	-4
C[C@]12CC[C@H]3[C@H]([C@@H]1CC[C@@H]2O)[C@H](CCCCCCCCCS(=O)CCCC(F)(F)C(F)(F)F)CC4=C3C=CC(O)=C4		3	1	-5.86003	-4	-6.31003
CC1=NN2C(NC(=CC2=O)C3=CC=C(Cl)C=C3)=C1C4=CC=CC=C4	2	4	4	-4.72127	-4	-4.42127
CC1=NN2C(NC(=CC2=O)C3=C(Cl)C=CC=C3)=C1C4=CC=CC=C4	2	4	4	-4.52127	-4.77127	-5.02127
CC1=NN2C(NC(C)=C(CC3=CC=C(C)C=C3)C2=O)=C1C4=CC=CC=C4	4	1	1	-4.67127	-4.42127	-5.12127
CC1=NN2C(NC(C)=C(CC3=CC=C(Br)C=C3)C2=O)=C1C4=CC=CC=C4	3	2	1	-4.92127	-4.67127	-4
CC1=NN2C(NC(C)=C(CC3=CC(C)=CC=C3)C2=O)=C1C4=CC=CC=C4	3	1	1	-4	-4.57127	-5.32127
CC1=NN2C(NC(C)=C(CC3=C(C)C=CC=C3)C2=O)=C1C4=CC=CC=C4	3	2	1	-4.57127	-4.57127	-5.57127
NC(=O)C1=C(N)N(C=N1)[C@@H]2O[C@H](CO)[C@@H](O)[C@H]2O		4		-4	-4	-4
CCOC(=O)[C@H](CCC1=CC=CC=C1)N[C@H]2CCC3=C(C=CC=C3)N(CC(O)=O)C2=O	4	4	2	-5.31003	-4.46003	-5.61003
CC(=O)OC1=CC=C(C=C1)C(=C2CCCCC2)C3=CC=C(OC(C)=O)C=C3	4	4	2	-5.01003	-4.81003	-5.16003
CCOC(=O)COC1=C(Cl)C2=C(C=C1)C(C)=C(CCN(CC)CC)C(=O)O2	4	3	4	-4	-4.56003	-4
OC(=O)CC1=CC=C(CCNS(=O)(=O)C2=CC=C(Cl)C=C2)C=C1	4	4	4	-4.61003	-4	-4
NC1=NCC2N1C3=C(CC4=C2C=CC=C4)C=CC=C3	4	4	4	-4	-5.81003	-4
O=C(NC1CCN(CCC2=CNC3=C2C=CC=C3)CC1)C4=CC=CC=C4	4	1	4	-4	-5.91003	-4
CC(OC(=O)NC1=C(ON=C1C)C2=CC=C(CSCCC(O)=O)C=C2)C3=C(Cl)C=CC=C3	2	4	1	-4.92127	-4	-5.72127
CCN(CC)C(=O)[C@@]1(C[C@@H]1CN)C2=CC=CC=C2	2	4	4	-4	-4.72127	-4.67127
NC1=NC(N)=C(N=O)C(OCC2CCCCC2)=N1		2		-4	-4	-4.97127
CCC1=NN(CCCN2CCN(CC2)C3=CC=CC(Cl)=C3)C(=O)N1CCOC4=CC=CC=C4	1	1	1	-4	-6.01003	-5.81003
NC(=O)C1(CCN(CCCC(=O)C2=CC=C(F)C=C2)CC1)N3CCCCC3	4	4	4	-4	-5.36003	-4
OC1(CCN(CCCC(C2=CC=C(F)C=C2)C3=CC=C(F)C=C3)CC1)C4=CC(=C(Cl)C=C4)C(F)(F)F	3	4	2	-4.81003	-5.91003	-4
COC1=CC=CC2=C1CCCC2CCCN3CCN(CC3)C4CCCCC4	1	1	1	-4	-5.67127	-4
NC(=O)C1=CN(CC2=C(F)C=CC=C2F)N=N1	4	4	4	-4	-4	-4
CCN(CC)CCOC1=CC=C(C=C1)C(O)(CC2=CC=C(Cl)C=C2)C3=CC=C(C)C=C3	2	1	1	-4.56003	-6.21003	-4.56003
NC(=O)C1=CC(=CC=C1)C2=CC(OC(=O)NC3CCCCC3)=CC=C2	1	3	2	-4	-4	-4.57127
CC[C@]1(NC(=O)N(C)C1=O)C2=CC=CC=C2	4	4	4	-4	-4	-4.41003
CCOC(=O)C1=C(COCCN)NC(C)=C(C1C2=C(Cl)C=CC=C2)C(=O)OC	4	4	4	-5.57127	-4.77127	-7.07127
CCC1=C2OC(=CC2=CC=C1)C(O)CNC(C)(C)C		1	3
OCCCC1=CC=CC=C1			1	-4	-4	-4
OC(=O)C1=NC=CC=C1			4	-4	-4	-4
NC(=N)N1C=CC=N1			4	-4	-4	-4
OS(=O)(=O)NC1CCCCC1	2	4	4	-4	-4	-4
CC(=O)N(CC(O)CO)C1=C(I)C(C(=O)NCC(O)CO)=C(I)C(C(=O)NCC(O)CO)=C1I	4	3		-4	-4	-4
CCOC(=O)C1=CC(N)=CC=C1	4	3	1	-4	-4	-4
O[C@@H](C(O)=O)C1=CC=CC=C1	3		4	-4	-4	-4
CCCCCCCCCCCCCCCCN	4	4	4	-4	-4	-4
CCN(CC)C(=O)C1=CC=CN=C1		4		-4	-4	-4.42127
COC1=CC(O)=CC(O)=C1	4	2	2	-4	-4	-4.96003
CNCC1=CC=CC=C1	4	4	4	-4	-4.96003	-4
CCOC(=O)C1=CN=CC=C1	4	2	4	-4	-4	-4.66003
CCOC(=O)[C@@H](N)CS	4	3	3	-4.97127	-4.62127	-4.42127
CCCCCCCCCCOCC(O)CN	1	1	2	-4.96565	-5.31565	-4.49065
OCC1=NC=CC=C1	3	4	4	-4	-4	-4
CC1=C(C=CC=C1)\N=N\C2=CC(C)=C(C=C2)\N=N\C3=C(O)C=CC4=CC=CC=C34	3	4		-4	-4.41003	-4.81003
CC(C)CCCC(C)N	2	4	4	-4	-4	-4
OC\C=C\C1=CC=CC=C1	4	4	3	-4.72127	-4	-4
NC(=O)CCCCC1CCSS1			4	-4	-4	-4
O=C(OCC1=CC=CC=C1)C2=CN=CC=C2	2	2	1	-4.82127	-4	-4
OC(=O)C1=CC=C[N+]([O-])=C1	4	3	1	-4	-4	-4
O=C1C(=C1C2=CC=CC=C2)C3=CC=CC=C3	3	1	4	-4.66003	-4	-7.16003
[O-]C(=O)C1=C(C=CC=C1)C2=C3C=C(Br)C(=O)C(Br)=C3OC4=C2C=C(Br)C([O-])=C4Br
NCC1=CN=CC=C1	4	4	1	-4	-4	-4
CCOC1=CC=C(NC(=O)CC(C)O)C=C1	4	4	4	-4	-4	-4
CC1=C(O)C(CO)=C(CSSCC2=C(CO)C(O)=C(C)N=C2)C=N1	4	2	3	-5.21003	-5.11003	-4.41003
CN(C)CCOC(C1=CC=C(Cl)C=C1)C2=NC=CC=C2	4	1	2	-4	-4.81003	-4
O=C(NC1=CC=CC=C1)OCC(CN2CCCCC2)OC(=O)NC3=CC=CC=C3	2	1	1	-4.86003	-6.81003	-5.11003
CCCCCCCC(=O)OCC(O)CO			1	-4.41003	-4	-4
CCN(CC1=CN=C(Cl)C=C1)C(\NC)=C\[N+]([O-])=O	4	4	4	-4	-4	-4
CC(C)(C)C(=O)C(OC1=CC=C(Cl)C=C1)N2C=CN=C2			3	-5.56003	-4.76003	-7.26003
CCOP(=S)(OCC)O\N=C(/C#N)C1=CC=CC=C1	1	1	4	-5.66003	-4.86003	-5.81003
OC(NC(=O)NC(O)C(Cl)(Cl)Cl)C(Cl)(Cl)Cl	4			-4	-4	-4
O=CC1=CC=CC=C1C=O	4		4	-4	-4	-4
OC(=O)CN1C2=C(C=CC=C2)C(=O)C3=C1C=CC=C3	4	4	4	-4	-4	-4
OCCC1=CC=CC=C1	2	1	4	-4	-4.61003	-4.96003
[O-][N+](=O)C1=CC=C(NC(=O)NC2=CC=C(C=C2)[N+]([O-])=O)C=C1	4	4	4	-4	-4	-4
NCC1=C(SC2=C(CO)C=CC=C2)C=CC=C1	1	2	4	-4.81003	-5.31003	-5.11003
C[C@H](O)CN(C)C	4	4	4	-4	-4	-4
C(CNCC1=CC=CC=C1)NCC2=CC=CC=C2	1	1	4	-4	-6.16003	-4.41003
CCCC1=CC=C(C=C1)C(O)=O	4	4	4	-4	-4	-4
OC(=O)C1=C(C=CC=C1)C2=CC=C(C=C2)C(F)(F)F			4	-4	-4	-4
COC(=O)CCCCCCCCC=C	4	4	4	-4	-4	-4.57127
CC(=O)OC1=CC=C(C)C=C1	3		4	-4	-4	-4
OCC1=CC=C[N+]([O-])=C1	4	4	3	-4	-4	-4
[O-][N+](=O)C1=NC=CN1CC(=O)NCC2=CC=CC=C2	2	4	4	-4	-4	-4.41003
OC1=C(I)C=C(C=C1I)[N+]([O-])=O	3	4	4	-4.67127	-4	-4
CC1=CC=C(O)C(=C1)N2N=C3C=CC=CC3=N2	1	1	1	-5.36003	-4.81003	-5.36003
NC1=CC2=NC3=CC(N)=CC=C3C=C2C=C1	2	1	4	-4	-4	-5.36003
CCN1C(=CC=CC2=[N+](CC)C3=CC=CC=C3C=C2)C=CC4=C1C=CC=C4		2		-4.86003	-5.41003	-5.61003
OC1=C(I)C2=C(C=C1I)C3(OC(=O)C4=C3C=CC=C4)C5=C(O2)C(I)=C(O)C(I)=C5	1	1	3	-4.71003	-4.76003	-4.36003
CC1=CN([C@H]2C[C@H](F)[C@@H](CO)O2)C(=O)NC1=O	2	4	3	-4	-4	-4
CC(C)CCOC(=O)C1=CC=C(C=C1)N(C)C	1	1	1	-5.16003	-4	-4
CCOC(=O)C(C#N)=C(C1=CC=CC=C1)C2=CC=CC=C2	1	1	3	-5.61003	-4	-4
OS(=O)(=O)C1=CC2=C(NC(=N2)C3=CC=CC=C3)C=C1	4		4	-4.61003	-5.01003	-4.41003
OC(=O)C1=CC=C(OCCCOC2=CC=C(C=C2)C(O)=O)C=C1	4	4	4	-4	-4.91003	-4
OC1=CC(O)=CC(O)=C1	4	4	3	-4	-4	-4.62127
COC1=CC=C2N=CC=C([C@@H](O)[C@@H]3C[C@@H]4CCN3C[C@@H]4C=C)C2=C1	2	4	4
CCCCCCCCCCCCOCCOCCOCCOCCOCCOCCOCCOCCOCCO	1	1		-4.66003	-4.91003	-5.06003
CC(=O)O[C@]1(C(C)=O)C(=C)C[C@H]2[C@@H]3C=C(C)C4=CC(=O)CC[C@]4(C)[C@H]3CC[C@]12C	1	3	1	-4.76003	-4	-4
CN1CCN(CC1)C2=C(F)C=C3C(=O)C(=CN(C4=CC=C(F)C=C4)C3=C2)C(O)=O	4	3	1	-4	-4	-4
C[C@]12C=CC3=C4CCC(=O)C=C4CC[C@H]3[C@@H]1CC[C@@]2(O)CC=C	1	2	1	-4.96003	-5.91003	-6.86003
OC[C@H]1O[C@H](C[C@@H]1O)N2C=C(C(=O)NC2=O)C(F)(F)F	4	4	4	-4	-4	-4
C[C@@H]1CCN([C@H](C1)C(O)=O)C(=O)[C@H](CCCNC(N)=N)N[S+]([O-])(=O)C2=CC=CC3=C2NCC(C)C3	4	4	1
O=C1N(C[C@H]2CCCC3=C2C1=CC=C3)[C@@H]4CN5CCC4CC5	4	1	4	-4	-4.51003	-4
CC1=CC=C(\C=C2\C3CCC(C)(C2=O)C3(C)C)C=C1	1	1	1	-5.07127	-4	-4.62127
CCN(CC)CCOC(=O)C1(CCCC1)C2=CC=CC=C2	3	1	2	-4	-5.66003	-4
CN1N=NC2=C(N=CN2C1=O)C(N)=O	4	3	2	-4	-4	-4
ClC1=C(COC(CN2C=CN=C2)C3=C(Cl)C=C(Cl)C=C3)C=CS1	1	1	1	-7.16003	-6.16003	-6.86003
COC(=O)C1=C(NC(C)=C(C1C2=CC(=CC=C2)[N+]([O-])=O)C(=O)OC(C)C)C#N	1			-5.97127	-4.62127	-5.12127
CC(C)OC(=O)C1=C(C)NC(N)=C(C1C2=CC=CC(=C2)[N+]([O-])=O)C(=O)OC3CN(C3)C(C4=CC=CC=C4)C5=CC=CC=C5	4	4	1	-5.71003	-5.01003	-6.16003
CN1C=C(C(=O)[C@@H]2CCC3=C(C2)NC=N3)C4=C1C=CC=C4	4	2	4	-4	-4.91003	-4.71003
OC(C(=O)O[C@@H]1C[C@@H]2CC[C@H](C1)[N+]23CCCC3)(C4=CC=CC=C4)C5=CC=CC=C5	4	4	4	-4	-5.21003	-4
COC1=C(OC2=C(NS(=O)(=O)C3=CC=C(C=C3)C(C)(C)C)N=C(N=C2OCCO)C4=NC=CC=N4)C=CC=C1	2	4	2	-4.56003	-4	-4.91003
CCCN[C@H]1CCC2=C(C1)SC(N)=N2	4	1	4	-4	-4.61003	-4
CCOC1=C(OCCN[C@H](C)CC2=CC(=C(OC)C=C2)S(N)(=O)=O)C=CC=C1	4	1	2	-4	-4.81003	-5.86003
CN1C(CCl)NC2=CC(Cl)=C(C=C2S1(=O)=O)S(N)(=O)=O	4		4	-4	-4	-4
CCCSSC(CCO)=C(C)N(CC1=C(N)N=C(C)N=C1)C=O	2	1	1	-4	-4	-4.76003
CCOC1=CC(OCC)=C(OCC)C=C1C(=O)CCC(O)=O	4	4	4	-4	-4	-4
OC1=C2C(=NC(=C1)C([O-])=O)C(=O)C=C3OC4=CC=CC=C4N=C23	2			-4.57127	-5.72127	-5.82127
CCC(C)(OC1=CC=C(C=C1)C2(CCCCC2)C3=CC=C(OC(C)(CC)C(O)=O)C=C3)C(O)=O	1	4	2	-4	-4	-4
CC1=CC=CC(C)=C1NC(=O)CC23CCCN2CCC3	3	4	2	-4	-4	-4
CC(C)C(=O)OCC\C(SS\C(CCOC(=O)C(C)C)=C(\C)N(CC1=C(N)N=C(C)N=C1)C=O)=C(/C)N(CC2=C(N)N=C(C)N=C2)C=O	1	1	1	-4	-4	-6.36003
CC[C@]12C=CC3=C4CCC(=O)C=C4CC[C@H]3[C@@H]1CC[C@@]2(O)C#C	2	4	1	-4	-6.01003	-5.91003
CCN1CC(CCN2CCOCC2)C(C1=O)(C3=CC=CC=C3)C4=CC=CC=C4	3	4	1	-4	-6.36003	-4.96003
CC(=O)O[C@H]1[C@H](C[C@H]2[C@@H]3CC[C@H]4C[C@H](OC(C)=O)[C@H](C[C@]4(C)[C@H]3CC[C@]12C)N5CCCCC5)[N+]6(C)CCCCC6	2	4	4	-4	-4.51003	-4
CC(=O)NC1=CC=C(OC(=O)C2=C(OC(C)=O)C=CC=C2)C=C1	1	1	1	-4	-4.81003	-4
COC1=CC=C(C=C1)C2=CC(=S)SS2	1	1	1	-4.96003	-4.96003	-4.96003
CC(C)C1=CC=C2OC3=C(C=C(C(O)=O)C(N)=N3)C(=O)C2=C1	4	4	2	-4.86003	-4.86003	-4.91003
CCOC1=NC2=CC=CC(C(O)=O)=C2N1CC3=CC=C(C=C3)C4=CC=CC=C4C5=NN=NN5	4	4	2	-4	-7.71003	-4.86003
CCN(CC)C(C)C(=O)C1=CC=CC=C1	4	3	1	-4	-4	-4
OCN1C(=O)CCC1=O	4	4		-4	-4	-4
CNC(=O)C1=NC=CC(OC2=CC=C(NC(=O)NC3=CC=C(Cl)C(=C3)C(F)(F)F)C=C2)=C1	2	4	1	-4.71003	-4.86003	-4.56003
COC1=CC=CC(CCC2=C(OCC(CN(C)C)OC(=O)CCC(O)=O)C=CC=C2)=C1	1	1	3	-4	-6.71003	-4.71003
CCCCN(CCCC)CC(O)C1=C2C(=CC(Cl)=C1)\C(=C/C3=CC=C(Cl)C=C3)C4=C2C=CC(Cl)=C4	4	4	3	-4.66003	-6.46003	-4.36003
NC1=C2CN(C3CCC(=O)NC3=O)C(=O)C2=CC=C1	4	3	4	-4	-4	-4
COC(=O)C1=C(C)NC(C)=C(C1C2=CC(=CC=C2)[N+]([O-])=O)C(=O)OC(C)(C)CN(C)CCC(C3=CC=CC=C3)C4=CC=CC=C4	1	2	1	-5.71003	-5.56003	-6.31003
COC(=O)C1=C(C)NC(C)=C(C1C2=CC=CC(=C2)[N+]([O-])=O)C(=O)OCCN3CCN(CC3)C(C4=CC=CC=C4)C5=CC=CC=C5	1	4	1	-5.81003	-5.36003	-4
CN(C)C1=CC2=[S+]C3=C(C=CC(=C3)N(C)C)N=C2C=C1		4		-6.16003	-6.41003	-6.31003
CC(=O)OCC(=O)NCCCOC1=CC=CC(CN2CCCCC2)=C1	4	2	4	-4	-4.86003	-4
CCOC(=O)\C=C(C)\C=C\C=C(/C)C=CC1=C(C)C(C)=C(OC)C=C1C	1		4	-5.11003	-4.61003	-4.51003
CCCCC1=NC=C(\C=C(/CC2=CC=CS2)C(O)=O)N1CC3=CC=C(C=C3)C(O)=O	4	4	3	-4	-4	-4
CS(=O)(=O)CCNCC1=CC=C(O1)C2=CC3=C(NC4=CC(Cl)=C(OCC5=CC=CC(F)=C5)C=C4)N=CN=C3C=C2	3	4	2	-5.86003	-5.46003	-5.81003
CC[N+]3(CCOC(=O)C(O)(C1=CC=CC=C1)C2=CC=CC=C2)CCCCC3			4	-4	-6.26003	-4
OC(=O)CCN1C2=C(C[C@@H](CC2)NS(=O)(=O)C3=CC=C(F)C=C3)C4=C1C=CC=C4	4	4	4	-4.76003	-4	-4.81003
COC1=NC2=C(NC(=N2)S(=O)CC3=C(C)C(OC)=C(C)C=N3)C=C1		2	1	-4.79065	-4	-4.81565
OC(CNCCCCCCNCC(O)C1=CC(O)=C(O)C=C1)C2=CC(O)=C(O)C=C2	1	4	4	-4	-4	-6.01003
COC1=CC(C)=C(CC2=C(N)N=C(N)N=C2)C=C1OC	4	4	4	-4	-4	-4
CCC(C)(C)C1=CC=C(CC(C)CN2C[C@H](C)O[C@H](C)C2)C=C1	1	1	1	-4.61003	-5.31003	-4.81003
CCOC(=O)C1=CN=C(C=C1)C#CC2=CC3=C(SCCC3(C)C)C=C2	1	1		-4	-4	-4.96003
CN(C)C(=O)COC(=O)CC1=CC=C(OC(=O)C2=CC=C(NC(N)=N)C=C2)C=C1	2	2	4	-4	-4	-4
CC1CN(CCN1)C2=C(F)C(C)=C3C(=O)C(=CN(C4CC4)C3=C2)C(O)=O	4	4	4	-4	-4	-4
CN1C2=C(C3=C1C=CC=C3)C(=O)N(CC4=C(C)NC=N4)CC2	4	4	3	-5.81003	-5.11003	-5.11003
COC1=C(OC)C=C(C=C1)C(=O)NCC2=CC=C(OCCN(C)C)C=C2	4	4		-4	-4	-4
CCN(C)C(=O)OC1=CC=CC(=C1)[C@H](C)N(C)C	4	1	4	-4	-4.66003	-4
CNC1CCCN(C1)C2=C(OC)C3=C(C=C2F)C(=O)C(=CN3C4CC4)C(O)=O	4	4	4	-4	-4	-4
CCCC1=NC(C)=C2N1NC(=NC2=O)C3=CC(=CC=C3OCC)[S+]([O-])(=O)N4CCN(CC)CC4	4	4	4	-4.66003	-4	-7.56004
C[C@H]1COC2=C(C(F)=CC3=C2N1C=C(C(O)=O)C3=O)C4(N)CC4	4	3	4	-4	-4	-4
NC1CCN(C1)C2=NC3=C(C=C2F)C(=O)C(=CN3C4=C(F)C=C(F)C=C4)C(O)=O	4	4	4	-4	-4	-4
COC1=C(OC)C=C2C(=O)C(CC3CCN(CC4=CC=CC=C4)CC3)CC2=C1	4	4	4	-4	-4.76003	-4
CC(C)NCC(O)C1=C(Cl)C=CC=C1	4	1	2	-4	-4.96003	-4
N1C=CC2=C1C=CC=C2	4	4	4	-4	-4	-4.66565
CC1=CNC2=C1C=CC=C2	4	2	4	-4	-4	-4
NCC(O)C1=CC=CC(O)=C1	2			-4	-4	-4
NC1=C(N)C=NC=C1	4	4	4	-4	-4	-4
CC(C)CCC[C@@H](C)CCC[C@@H](C)CCC[C@]1(C)CCC2=C(C)C(OC(=O)CCC(O)=O)=C(C)C(C)=C2O1		4	1	-4.67127	-4.42127	-4.67127
CN1C2=C(NC(Br)=N2)C(=O)N(C)C1=O	4	4	4	-4	-4	-4
CO[C@H]1[C@@H](C[C@@H]2CN3CCC4=C(NC5=C4C=CC(OC)=C5)[C@H]3C[C@@H]2[C@@H]1C(=O)OC)OC(=O)COC6=CC=C(OC)C=C6	1	1	1	-4	-5.01003	-5.66003
FC(F)(F)C1=CC=CC(=C1)C2=CCN(CCC3=CC=C4C=CC=CC4=C3)CC2	1	1	1	-4	-8.01002	-4
CCN(CC)CCCN(C1CC2=C(C1)C=CC=C2)C3=CC=CC=C3	2	1	1	-4	-7.41003	-4.96003
CC(CC1=CC(C)=CC(=O)N1O)CC(C)(C)C	4	4	4
OC(=O)CN1C(=CC2=C1C=CC=C2)C(=O)NC3=NC(=CS3)C4=C(Cl)C=CC=C4	1	4	1	-4	-4.41003	-4.61003
NCCNC(=O)C1=CC=C(Cl)C=N1	4	1	4	-4	-4	-4
CC1CCN(CCCC(=O)C2=CC=C(F)C=C2)CC1	4	1	4	-4	-6.71003	-4
FC(F)(F)C1=CC=CC(NC2=C(C=CC=N2)C(=O)OC3OC(=O)C4=C3C=CC=C4)=C1	1	1		-5.36003	-4	-4
NC(=O)COCCN1CCN(CC1)C(C2=CC=CC=C2)C3=CC=C(Cl)C=C3	4		1	-4	-4	-4
FC1=CC=C(C=C1)N2CCN(CCCN3C4=C5C(=CC=CC5=CC=C4)S3(=O)=O)CC2	1	1	1	-4	-5.46003	-7.26003
CC(C)(CC1=CNC2=C1C=CC=C2)NCC(O)COC3=C(C=CC=C3)C#N	2	1	1	-4	-6.81003	-4
COC1=C(OCCNCC(O)COC2=CC=CC3=C2C4=CC=CC=C4N3)C=CC=C1	2	1	1	-6.01003	-5.71003	-6.01003
CC1(C)CC1C(=O)N\C(=C\CCCCSCC(N)C(=O)O[Na])C(O)=O			4	-4	-4	-4
CCOC(=O)[C@H](CCC1=CC=CC=C1)N[C@@H](C)C(=O)N2CC3=CC=CC=C3C[C@H]2C(O)=O	4	4	4	-4.58001	-4	-4.89065
CCOC(=O)C1(CCN(CCC(C#N)(C2=CC=CC=C2)C3=CC=CC=C3)CC1)C4=CC=CC=C4			1	-5.81003	-5.76003	-4
CCC1=CC=C(C=C1)C(=O)C(C)CN2CCCCC2	2	1	1	-4	-6.06003	-4
CC(C(O)=O)C1=CC=C2OC3=C(CC2=C1)C=CC=N3	4	4	4	-4	-4	-4
COC1=C2C(=O)C3=C(C(=O)C2=CC=C1)C(O)=C4C[C@](O)(C[C@H](O[C@H]5C[C@H](N)[C@H](O[C@H]6CCCCO6)[C@H](C)O5)C4=C3O)C(=O)CO			1
ONC(=O)CCCCCCC(=O)NC1=CC=CC=C1	4	4	4	-4	-5.31003	-4
CC1=NC=C2CN=C(C3=C(F)C=CC=C3)C4=C(C=CC(Cl)=C4)N12	3	4	1	-4.56003	-4.36003	-5.11003
C1=NN=NN1C2=CC=CC=C2	4	4	4	-4	-4	-4
CC(C)CN1C=NC2=C1C(=O)N(C)C(=O)N2C	4	4	3	-4	-4	-4
CC(C)=CC1C(C(=O)OCN2C(=O)C3=C(CCCC3)C2=O)C1(C)C	1	1	1	-5.06003	-5.16003	-4.36003
CCCN(CCC1=CC=CS1)[C@H]2CCC3=C(O)C=CC=C3C2	1	1	1	-4.35501	-6.74065	-4
OC(=O)C1=CC(=CC=C1)C2=NOC(=N2)C3=C(F)C=CC=C3	4	4	2	-5.81003	-5.81003	-5.06003
CC(C)CN(C[C@@H](O)[C@H](CC1=CC=CC=C1)NC(=O)O[C@H]2CO[C@H]3OCC[C@@H]23)S(=O)(=O)C4=CC=C(N)C=C4	4	4	1	-5.12127	-4.57127	-6.72127
CC(C)NC1=C(N=CC=C1)N2CCN(CC2)C(=O)C3=CC4=C(N3)C=CC(NS(C)(=O)=O)=C4	4	1	1	-5.71003	-5.16003	-5.66003
NC1=NC(=O)N(C=C1)[C@@H]2O[C@H](CO)[C@@H](O)C2(F)F	4	4	3	-4	-4	-4
ClC1=CC=C(C=C1)C(C#N)C2=C(Cl)C=C(C=C2Cl)N3N=CC(=O)NC3=O	2	4	3	-4.72127	-4.62127	-5.07127
OC[C@H]1O[C@@H](OCCC2=CC=C(O)C=C2)[C@H](O)[C@@H](O)[C@@H]1O	2	4		-4	-4	-4
C[C@H]1C[C@H](C)C(=O)[C@@H](C1)[C@H](O)CC2CC(=O)NC(=O)C2	4	4	2	-4	-4	-4
COC1=C(OC)C2=C(CC3N(CCC4=C3C=C5OCOC5=C4)C2)C=C1	1	1	2	-4.71003	-7.51003	-5.56003
CN1CCCN=C1\C=C\C2=CC=CS2	3	1	4	-4	-4.86003	-6.11003
CN1CCCC(CC1)N2N=C(CC3=CC=C(Cl)C=C3)C4=C(C=CC=C4)C2=O	3	1	2	-4	-6.21003	-5.61003
ClC1=CC(Cl)=C(CO\N=C(/CN2C=CN=C2)C3=C(Cl)C=C(Cl)C=C3)C=C1	1	1	1	-6.01003	-5.51003	-6.41003
CCN1C=C(C(O)=O)C(=O)C2=C1C=C(N3CCN(C)CC3)C(F)=C2	4	4	4	-4	-4	-4
C[C@H](N)[C@H](O)C1=CC(O)=CC=C1	4	2	1	-4	-4	-4
CC(N)CCCC(C)(C)O			3	-4	-4	-4
CC[C@H]1OC(=O)[C@H](C)[C@@H](O[C@H]2C[C@@](C)(OC)[C@@H](O)[C@H](C)O2)[C@H](C)[C@@H](O[C@@H]3O[C@H](C)C[C@@H]([C@H]3O)N(C)C)[C@@](C)(C[C@@H](C)C(=O)[C@H](C)[C@@H](O)[C@]1(C)O)OC	4	4	1	-4	-4	-4.97127
CC(CN1CCCCC1)C(=O)C2=CC=C(C)C=C2	4	1	4	-4	-5.76003	-4
ClC1=CC=C(C=C1)C(OCCN2CCCCC2)C3=CC=CC=C3	1	1	1	-4	-7.31003	-5.21003
NCC(=O)CCC(O)=O		3	4	-4	-4	-4
CCOC(=O)[C@H](CCC1=CC=CC=C1)N[C@@H](C)C(=O)N2[C@H]3CCC[C@H]3C[C@H]2C(O)=O	4	4	1	-4	-4	-4.61003
COC1=CC=C(CN(CCN(C)C)C2=NC=CC=N2)C=C1	4	1	4	-4	-6.31003	-4
CN1C2=C(C=C(Cl)C=C2)C(=NCC1=O)C3=CC=CC=C3	2	4	3	-4.66003	-4	-5.06003
CCN(CC)CCOC(=O)C(CC1CCCO1)CC2=C3C=CC=CC3=CC=C2	1	1	1	-4	-5.49065	-5.96565
CCN(CC)CCOC(=O)C(C1CCCCC1)C2=CC=CC=C2	1	1	1	-4.51003	-5.51003	-5.46003
CS(=O)(=O)C1=CC=C(C=C1)[C@@H](O)[C@@H](CO)NC(=O)C(Cl)Cl	4	4		-4	-4.81003	-4
CC(CC1=CC=CC(=C1)C(F)(F)F)NCCOC(=O)C2=CC=CC=C2	1	1	1	-4.71003	-8.16002	-6.51003
CCCCCC(C)N			1	-4	-4	-4
CCN1CCCC(C1)OC(=O)C(C2=CC=CC=C2)C3=CC=CC=C3	2	1	1	-4	-5.86003	-4.86003
C[C@]12C[C@H](O)[C@@]3(F)C(CCC4=CC(=O)C=C[C@]34C)C1C[C@@H](O)[C@]2(O)C(=O)CO	4	4	1
O[C@H]1CC[C@H]2CN3CCC4=C(NC5=C4C=CC=C5)[C@@H]3C[C@@H]2[C@H]1C(O)=O	4	4	3	-4	-6.01003	-5.86003
COC1=CC2=C3[C@@H](CC4=CC(OC5=C(OC)C=C6CCN(C)[C@@H](CC7=CC=C(OC3=C1O)C=C7)C6=C5)=C(O)C=C4)[N+](C)(C)CC2	1	4	4	-4	-4	-4
NC1=NC(=CS1)C(=N\O)\C(=O)N[C@H]2[C@H]3SCC(C=C)=C(N3C2=O)C(O)=O	4	4	4	-4	-4	-4
CN(N=O)C(=O)N[C@H]1[C@@H](O)O[C@H](CO)[C@@H](O)[C@@H]1O	1	4		-4	-4	-4
CN(CC1=C(N)C(Br)=CC(Br)=C1)C2CCCCC2	1	1	1	-4.36003	-7.71003	-4
CN(C)CCC[C@]1(OCC2=C1C=CC(=C2)C#N)C3=CC=C(F)C=C3	4	1	3	-4	-4.89065	-4
CN1CCCN=C1\C=C\C2=C(C)C=CS2	4	1	1	-4	-5.11003	-4
CCCCN1CCCCC1C(=O)NC2=C(C)C=CC=C2C		4	1
O[C@H]1[C@H](O)[C@@H](O)[C@H](O)[C@H](O)[C@@H]1O		4		-4	-4	-4
CC(C)[C@H](N)C(=O)OCCOCN1C=NC2=C1N=C(N)NC2=O	4	4	4	-4	-4	-4.33563
CCC1=C2C=C(OC(=O)N3CCC(CC3)N4CCCCC4)C=CC2=NC5=C1CN6C5=CC7=C(COC(=O)[C@]7(O)CC)C6=O	2	4	4	-4	-4	-4
CN1C(C)(C)CCCC1(C)C	4	4	4	-4	-5.41003	-4
CO\N=C1/CN(CC1CN)C2=C(F)C=C3C(=O)C(=CN(C4CC4)C3=N2)C(O)=O	2		4	-4	-4	-4
CC1(C)O[C@@H]2CO[C@@]3(COS(N)(=O)=O)OC(C)(C)O[C@H]3[C@@H]2O1	4	4	3	-4	-4	-4
CC(CN(C)C)CN1C2=C(SC3=C1C=CC=C3)C=CC=C2	2	1	2
COC1=CC2=CC=CN=C2C(NC(C)CCCN)=C1	4	1	4	-4.41003	-5.26003	-4.81003
CC(=O)N(O)CCCCCNC(=O)CCC(=O)N(O)CCCCCNC(=O)CCC(=O)N(O)CCCCCN	4	1	4	-4	-4	-4
N[C@H]1[C@H](O)O[C@H](CO)[C@@H](O)[C@@H]1O	1
CN(C)[C@H]1[C@@H]2C[C@@H]3CC4=C(C(O)=CC=C4N(C)C)C(=O)C3=C(O)[C@]2(O)C(=O)C(C(N)=O)=C1O	4	4	4	-4	-4	-4
CCN(CC)C(C)CN1C2=C(SC3=C1C=CC=C3)C=CC=C2	2	1	1	-4	-4.71003	-4.76003
CC[C@@H](CO)NCCN[C@@H](CC)CO	2	4		-4	-4	-4
NC1=C2N=CN([C@@H]3O[C@H](CO)[C@@H](O)[C@H]3O)C2=NC=N1	4	3	4	-4	-4	-4
C[N+]1(C)CCCC(C1)OC(=O)C(O)(C2=CC=CC=C2)C3=CC=CC=C3	4	4		-4	-4.91003	-4
CC1(C)S[C@@H]2[C@H](NC(=O)[C@H](N)C3=CC=CC=C3)C(=O)N2[C@H]1C([O-])=O	4	3	4
NC(=N)C1=CC=C(OCCCCCOC2=CC=C(C=C2)C(N)=N)C=C1	1	4	4	-4	-4	-4
C[C@@H]1CN(CC[C@]1(C(O)=O)C2=CC=CC=C2)[C@H]3CC[C@](CC3)(C#N)C4=CC=C(F)C=C4	4	4	4	-4	-7.31003	-4
CCN[C@H]1C[C@H](C)[S+]([O-])(=O)C2=C1C=C(S2)[S+](N)([O-])=O	4	1	4
CCCNC(C)C(=O)NC1=C(SC=C1C)C(=O)OC	3	4	4	-4	-4.56003	-4
CCCCN(CCCC)CCC(O)C1=CC2=C(Cl)C=C(Cl)C=C2C3=C1C=CC(=C3)C(F)(F)F	2	3	1	-4	-6.26003	-5.66003
COC(=O)[C@@]1(C)[C@H](C)C[C@H]2[C@@H]3CCC4=CC(=O)C=C[C@]4(C)[C@H]3[C@@H](O)C[C@]12C	4	4	1	-5.41003	-4	-4
CCO[C@@H]1O[C@H](C(COCC2=CC=CC=C2)OCC3=CC=CC=C3)[C@H](OCC4=CC=CC=C4)[C@H]1O	1	4	4	-5.51003	-4.96003	-5.11003
CCNCC(O)C1=CC(O)=CC=C1	4	3		-4	-4	-4
CC(C)(C)C(=O)OCOC(=O)[C@@H]1N2[C@H](SC1(C)C)[C@H](NC(=O)[C@H](N)C3=CC=CC=C3)C2=O	1	2		-4.56003	-4	-5.21003
CCC1(CCCCN(C)C1)C2=CC(O)=CC=C2	4	1	4	-4	-4.86003	-4
CCC(=O)O[C@@]1([C@H](C)C[C@H]2C3C[C@H](F)C4=CC(=O)C=C[C@]4(C)[C@@]3(F)[C@@H](O)C[C@]12C)C(=O)SCF	2	2	1	-5.56003	-4	-6.01003
NC(=O)C1=CC=[N+](CC2=C(N3[C@H](SC2)[C@H](NC(=O)CC4=CC=CS4)C3=O)C([O-])=O)C=C1	4	3	4	-4	-4	-4
NS(=O)(=O)C1=C(Cl)C=C2NC(CC3CCCC3)NS(=O)(=O)C2=C1	1	3	3	-4	-4.61003	-4.41003
CN(C\C=C\C1=CC=CC=C1)CC2=C3C=CC=CC3=CC=C2	1	1	1	-4.41003	-6.46003	-4
CN1C(=O)CC(C1=O)C2=CC=CC=C2	4	4	4	-4	-4	-4
CN1C2=C(C3=C1C=CC=C3)C(=O)C(CN4C=CN=C4C)CC2	4	1	3	-4	-4.91565	-4.61565
CC(C)NCC(O)COC1=C(OCC=C)C=CC=C1	4	1	4	-4	-4.86003	-4
CCC1NC(=O)C2=CC(=C(Cl)C=C2N1)S(N)(=O)=O		4	4	-4	-4	-4
CN(C)[C@H]1[C@@H]2[C@@H](O)[C@@H]3C(=C)C4=C(C(O)=CC=C4)C(=O)C3=C(O)[C@]2(O)C(=O)C(C(N)=O)=C1O	4	4	4	-4	-4.41003	-4
C[C@H](CCC(O)=O)[C@H]1CC[C@H]2[C@@H]3[C@@H](O)C[C@@H]4C[C@H](O)CC[C@]4(C)[C@H]3CC[C@]12C	2	4	1	-4	-4	-4
CS(=O)(=O)C1=CC=C(C=C1)[C@@H](O)[C@@H](CF)NC(=O)C(Cl)Cl			3	-4	-4	-4
COCC(=O)NC1=C(I)C(C(=O)N(C)CC(O)CO)=C(I)C(C(=O)NCC(O)CO)=C1I	4	4	4	-4	-4	-4
CC1CC(CC(C)(C)N1C)OC(=O)C(O)C2=CC=CC=C2	3	1	4	-4	-4	-4
CC(O)(P(O)([O-])=O)P(O)([O-])=O			1	-4	-4	-4
CC(CNC1CCCCC1)OC(=O)C2=CC=CC=C2	3	1	4	-4	-5.81003	-4
CC(CC1=CC=CC=C1)N(C)CC2=C(C(C)C)C(=O)N(N2C)C3=CC=CC=C3	1	1	1	-5.11003	-4	-5.31003
CCN1C(=O)NC(C1=O)C2=CC=CC=C2	4	3	2	-4.57127	-4	-4
[O-][N+](=O)C1=CC=C(O1)\C=N\N2CC(CN3CCOCC3)OC2=O	1	1		-4	-4.81003	-5.76003
ClCCNP1(=O)OCCCN1CCCl	4	4	4	-4	-4	-4
CC(=O)[C@H]1CC[C@H]2[C@@H]3C=CC4=CC(=O)CC[C@@]4(C)[C@@H]3CC[C@]12C	3	4	1	-4.86003	-4.81003	-4
CCN(CC)CCC1=NC(=NO1)C2=CC=CC=C2	3	1	3	-4	-4	-4
C[C@H]1C[C@H]2[C@@H]3CC[C@H](C(C)=O)[C@@]3(C)C[C@H](O)[C@@H]2[C@@]4(C)CCC(=O)C=C14	4	4	1	-6.06565	-4.36063	-4.38563
CC1(C)O[C@@H]2C[C@H]3[C@@H]4CCC5=CC(=O)CC[C@]5(C)[C@@]4(F)[C@@H](O)C[C@]3(C)[C@@]2(O1)C(=O)CCl	3	4	1	-5.06003	-4	-4
CC(=O)NC1CCSC1=O	4	4	3	-4	-4	-4
CC1(C)O[C@@H]2C[C@H]3[C@@H]4C[C@H](F)C5=CC(=O)C=C[C@]5(C)[C@H]4[C@@H](O)C[C@]3(C)[C@@]2(O1)C(=O)CO	4	4	1	-4.41003	-4	-4.56003
OC1=CC=C(C=C1)C(=O)N\N=C\C2=CC=C(O2)[N+]([O-])=O	2	1	1
COC1=C(O)C=C(C=C1)[C@@H]2CC(=O)C3=C(O2)C=C(O[C@@H]4O[C@H](CO[C@@H]5O[C@@H](C)[C@H](O)[C@@H](O)[C@H]5O)[C@@H](O)[C@H](O)[C@H]4O)C=C3O	4	4	4	-4	-4	-4
COC1=CC(=CC(OC)=C1O)[C@H]2[C@@H]3[C@H](COC3=O)[C@H](O[C@@H]4O[C@@H]5CO[C@@H](C)O[C@H]5[C@H](O)[C@H]4O)C6=C2C=C7OCOC7=C6	3	4	3	-4.67127	-4	-4.42127
CC(=O)SCC(CC1=CC=CC=C1)C(=O)NCC(=O)OCC2=CC=CC=C2	1	1	1
NC1=NC(=CS1)C(=N\OCC(O)=O)\C(=O)N[C@H]2[C@H]3SCC(C=C)=C(N3C2=O)C(O)=O	4	4	4	-4	-4	-4
CO[C@H]1C=CO[C@@]2(C)OC3=C(C2=O)C4=C(C(O)=C3C)C(O)=C(NC(=O)C(C)=CC=C[C@H](C)[C@H](O)[C@@H](C)[C@@H](O)[C@@H](C)[C@H](OC(C)=O)[C@@H]1C)C(\C=N\N5CCN(C)CC5)=C4O	4	4	4	-4.51003	-4	-4.86003
CC(C)(C)NCC(O)COC1=C2CCC(=O)NC2=CC=C1	4	2	4	-4	-4	-4
CCN[C@H]1CN(CCCOC)S(=O)(=O)C2=C1C=C(S2)S(N)(=O)=O	4	3	4	-4	-4.41003	-4.36003
CN(C)C(=O)OC1=CC(=CC(OC(=O)N(C)C)=C1)C(O)CNC(C)(C)C	3	1	4	-4	-5.06003	-4
CC1=C(N2[C@H](SC1)[C@H](NC(=O)[C@H](N)C3=CC=C(O)C=C3)C2=O)C(O)=O	4		4	-4	-4	-4
C[C@H](NCCC1=CC=C(O)C=C1)[C@H](O)C2=CC=C(O)C=C2	4	1	4	-4	-4.87127	-4
CC(C(O)=O)C1=CC=C(S1)C(=O)C2=CC=CC=C2	4	4	4	-4.81003	-4	-4
C[C@@H]1C[C@H]2[C@@H]3CCC4=CC(=O)C=C[C@]4(C)[C@@]3(Cl)[C@@H](O)C[C@]2(C)[C@@]1(OC(=O)C5=CC=CO5)C(=O)CCl	1	1	1	-5.36003	-5.61003	-5.91003
OC(=O)CCCC[C@@H]1SC[C@@H]2NC(=O)N[C@H]12	4	3		-4	-4	-4
CCOC(=O)OC(C)OC(=O)[C@@H]1N2[C@H](SC1(C)C)[C@H](NC(=O)[C@H](N)C3=CC=CC=C3)C2=O	1	1	1	-4	-4.61003	-5.66003
CN(C)CCN1N=NN=C1SCC2=C(N3[C@H](SC2)[C@H](NC(=O)CC4=CSC(N)=N4)C3=O)C(O)=O	4			-4	-4.76003	-4.71003
ClC1=CC=C(CCC(CN2C=CN=C2)SC3=C(Cl)C=CC=C3Cl)C=C1	2	4	1	-7.91002	-6.26003	-7.71003
CCC(=O)O[C@H]1CC[C@H]2[C@@H]3CCC4=CC(=O)CC[C@]4(C)[C@H]3CC[C@]12C	1	1	1	-4.79065	-4.59065	-4.21063
NC(=O)OCC(O)COC1=CC=C(Cl)C=C1	4	3	1	-4	-4	-4
NCCCC[C@H](N[C@@H](CCC1=CC=CC=C1)C(O)=O)C(=O)N2CCC[C@H]2C(O)=O	4	4		-4	-4	-4
CN(C)S(=O)(=O)C1=CC=C2SC3=C(C=CC=C3)N(CCCN4CCN(C)CC4)C2=C1	2	1	1	-4.71003	-4.96003	-5.66003
CN1[C@H]2CC[C@@H]1C[C@@H](C2)OC(=O)C(O)C3=CC=CC=C3	2		4	-4	-4	-4
CCC(C)(CN(C)C)OC(=O)C1=CC=CC=C1	3	1	2	-4	-4.91003	-4
ClC1=CC(Cl)=C(C=C1)C(CN2C=CN=C2)OCC3=C(Cl)C=CC=C3Cl	2	3	1	-6.16003	-5.56003	-6.96003
C[C@]12C[C@H](O)[C@H]3[C@@H](CCC4=CC(=O)C=C[C@]34C)[C@@H]1CC[C@]2(O)C(=O)CO	1	4	1	-4	-4	-4
CC(=O)CC(C1=CC=C(C=C1)[N+]([O-])=O)C2=C(O)C3=C(OC2=O)C=CC=C3	2	4	3	-5.66003	-4	-4
CCN(CC)C(=O)N[C@H]1CN(C)[C@H]2CC3=CNC4=C3C(=CC=C4)C2=C1	4	2	1	-4	-8.41005	-5.36003
C[C@]12CC[C@H]3[C@@H](CCC4=CC5=C(C[C@]34C)C=NO5)[C@@H]1CC[C@@]2(O)C#C	1	1	1	-5.86003	-4.86003	-5.46003
C[C@]12CC[C@H]3[C@@H](CCC4=CC(=O)CC[C@H]34)[C@@H]1CC[C@@]2(O)C#C	4	4	2	-5.01003	-4.36003	-4.86003
ClC1=CC=CC(Cl)=C1N=C2NCCN2	4	1	4	-4	-4.76003	-4
CC(=O)OCC(=O)[C@@]1(O)CC[C@H]2[C@@H]3CCC4=CC(=O)C=C[C@]4(C)[C@@]3(F)[C@@H](O)C[C@]12C	4	1	1	-4	-4	-4
CC1=C(C=CC=C1NC2=C(C=CC=N2)C(O)=O)C(F)(F)F	4	4	2	-4	-4	-4.61003
C[C@@H](NCCCC1=CC=CC(=C1)C(F)(F)F)C2=CC=CC3=CC=CC=C23	1	1	1	-4.56565	-7.61565	-6.26565
CNC(C)[C@@H](O)C1=CC=C(O)C=C1	4	3	4	-4	-4	-4
OC1=CC=C(C=C1C([O-])=O)\N=N\C2=CC=C(O)C(=C2)C([O-])=O		2		-4.97127	-4.72127	-4.52127
COC1CC(C[N+](C)(C)C1)=C(C2=CC=CS2)C3=CC=CS3	4			-4	-6.86003	-4
CC(C)(C)NCC(O)C1=CC(Cl)=C(N)C(=C1)C(F)(F)F	4	1	4	-4	-4.81003	-4
OC1=CC(=O)NC=C1Cl	4	4	4	-4	-4	-4
CC1=C(SC2=CC=NC=C2)C3=C(C=C1)N=C(N)N=C3O	4	4	1	-5.26565	-5.04065	-5.03563
ClC1=CC=C(C=C1)\C=N\NC(=N)N\N=C/C2=CC=C(Cl)C=C2	2	4	3	-4.86003	-4.81003	-5.46003
CC(C)(CO)C(O)C(=O)NCCC(=O)NCCSSCCNC(=O)CCNC(=O)C(O)C(C)(C)CO	4	3	3	-4	-4	-4
O=C1NC=CC(=O)N1		1	4	-4	-4	-4
ClC1=CC=CC(=C1)C(N2C=CN=C2)C3=CC4=C(NC=N4)C=C3		2	1	-5.11003	-4.81003	-6.71003
CCCC1CCCCN1			4	-4	-4.41003	-4
CC(C)C1CCC(C)CC1OC(=O)C2=C(O)C=CC=C2	3	4	4	-4	-4	-4
O=C(OC1C[C@H]2CC3C[C@@H](C1)N2CC3=O)C4=CNC5=CC=CC=C45	4	3	2
CCCOC(C(=O)OC1CCN(C)CC1)(C2=CC=CC=C2)C3=CC=CC=C3	2	3	1	-4	-5.46003	-6.56003
CC1(C)CCC(C)(C)C2=C1C=CC(NC(=O)C3=CC=C(C=C3)C(O)=O)=C2	2	4	2	-4	-4	-4.76003
C1CCN2C[C@@H]3C[C@@H](CN4CCCC[C@H]34)[C@@H]2C1	4	1	4	-4	-4.76003	-4
CC1=NC(NC2=NC=C(S2)C(=O)NC3=C(C)C=CC=C3Cl)=CC(=N1)N4CCN(CCO)CC4	3	4	1	-4	-4	-4.81003
CN1CCC[C@@H]1CC2=CNC3=C2C=C(CCS(=O)(=O)C4=CC=CC=C4)C=C3	4	1	2	-4.86003	-4.86003	-5.01003
O[C@@H]1CCCNC1CC(=O)CN2C=NC3=CC(Br)=C(Cl)C=C3C2=O		1		-4	-4	-4
O[As](O)(=O)C1=CC=C(C=C1)[N+]([O-])=O	4	4	2	-4	-4	-4
CCOC(=O)C1=C(O)C=CC=C1	4	4	4	-4	-4	-4
CN1C(CCCC(O)=O)=NC2=C1C=CC(=C2)N(CCCl)CCCl	1	1	1	-4	-4	-4
C[C@]1(O)CC[C@H]2[C@@H]3CC[C@H]4CC5=NON=C5C[C@]4(C)[C@H]3CC[C@]12C	1		1	-4.51003	-4	-4.61003
CC(N(CC1=C(N)N=C(C)N=C1)C=O)=C(CCO)SSC(CCO)=C(C)N(CC2=C(N)N=C(C)N=C2)C=O	1	3	4	-4	-4.41003	-4.41003
CC1=C(C)C(=O)C(C(CCCCCC(O)=O)C2=CC=CC=C2)=C(C)C1=O	1	3	4	-4.76003	-4.96003	-5.81003
CC1=CC(C)=C(NC(=O)CN(CC(O)=O)CC(O)=O)C(C)=C1Br	4		1	-4	-4	-4
CCCC(=O)OC[C@@H](OC(=O)CCC)[C@@H](OC(=O)CCC)[C@H](CN1C2=NC(=O)NC(=O)C2=NC3=C1C=C(C)C(C)=C3)OC(=O)CCC	1	1	1	-4.91003	-5.11003	-6.16003
CCCCOC(=O)CC(CC(=O)OCCCC)(OC(C)=O)C(=O)OCCCC	1	1	1	-5.76003	-4	-5.81003
NC(=N)NN=C(C=CC1=CC=C(O1)[N+]([O-])=O)C=CC2=CC=C(O2)[N+]([O-])=O			1	-4.81003	-5.56003	-6.06003
NS(=O)(=O)C1=C(Cl)C=C(NCC2=CC=CS2)C(=C1)C3=NNN=N3	2	4	4	-4.84065	-4	-5.04065
CCOCCN1C(=NC2=C1C=CC=C2)N3CCCN(C)CC3	4	1	4	-4	-5.16003	-4
CCOC(=O)[C@H](CCC1=CC=CC=C1)N[C@@H](C)C(=O)N2[C@@H](CN(C)C2=O)C(O)=O	4	4	4	-4	-4	-4
ClC1=CC=C(NC2=C3C=CC=CC3=C(CC4=CC=NC=C4)N=N2)C=C1	4	1	1	-7.31003	-7.76003	-6.86003
C[N+]4(CC1COC(O1)(C2CCCCC2)C3=CC=CC=C3)CCCCC4	4			-4	-5.81003	-4.86003
CO\N=C(\C(=O)N[C@H]1[C@H]2SCC(C[N+]3=C4C=CC=NN4C=C3)=C(N2C1=O)C([O-])=O)C5=NSC(N)=N5	4	4	4	-4	-4	-4
CCOC(=O)[C@H](CCC1=CC=CC=C1)N[C@@H](C)C(=O)N(CC(O)=O)C2CC3=C(C2)C=CC=C3	2	4	2	-4.71003	-4.96003	-5.21003
O=C(NC1=C2OC(=CC(=O)C2=CC=C1)C3=NNN=N3)C4=CC=C(OCCCCC5=CC=CC=C5)C=C4		4	1	-5.11003	-4.81003	-4.96003
CC1=CC=C(C=C1)C(=O)C2=CC(O)=C(O)C(=C2)[N+]([O-])=O	1	4	2	-5.26003	-4	-4
CCC(=O)N[S+]([O-])(=O)C1=CC=C(C=C1)C2=C(C)ON=C2C3=CC=CC=C3	4	4	4	-5.17127	-4	-4.52127
CC1=CC2=CC3=CC=CC(O)=C3C(O)=C2C(O)=C1	4	4	4	-5.51003	-4	-5.36003
S=C(SSC(=S)N1CCCCC1)N2CCCCC2	4		3	-4.46003	-4	-4.41003
FC1=CC=C(C=C1)N2C=C(C3CCN(CCN4CCNC4=O)CC3)C5=C2C=CC(Cl)=C5	4	1	1	-4.41003	-5.81003	-4.41003
CNS(=O)(=O)CCC1=CC2=C(NC=C2C3CCN(C)CC3)C=C1	4	4	4	-4	-4.51003	-4
CO\N=C(\C(=O)N[C@H]1[C@H]2SCC(C)=C(N2C1=O)C(=O)OCOC(=O)C(C)(C)C)C3=CSC(N)=N3	1	1	1	-4.76003	-4	-5.41003
CC1=CC(CC(O)=O)=C(NC2=C(Cl)C=CC=C2F)C=C1	1	4	1	-4.66003	-4.56003	-4.41003
CCOC(=O)C1=CC=C(NC(=O)CN2CCCCC2)C=C1	1	1	4	-4	-4.81003	-4
CN(C)C(=O)CNC(=O)CC1=CC=CC=C1	4	4	4	-4	-4	-4
CCCCC1C(=O)NC(=O)N(C2CCCCC2)C1=O		4	4	-4.28563	-4	-4.33563
CCOC(=O)C1=C2CN(C)C(=O)C3=C(C=CC=C3I)N2C=N1	3	4	4	-4	-4	-4
CC(C(O)C1=CC=CC=C1)N(C)CCOC(C2=CC=CC=C2)C3=CC=CC=C3	1	1	1	-4.86003	-7.51003	-6.06003
CCN(CC)CCNC(=O)C1=C(OCC=C)C=C(Cl)C=C1	4	1	4	-4	-6.56003	-4.71003
CC(C(=O)OCC(=O)N(C)C)C1=CC=C2OC3=C(CC2=C1)C=CC(C)=N3	4	3	3	-4.81003	-4.56003	-4
CCOC1=NN=C(NS(=O)(=O)C2=CC=C(N)C=C2)C=C1	4	4	4	-4	-4	-4.41003
CC1(C)S[C@@H]2[C@H](NC(=O)C(C(=O)OC3=CC=C4CCCC4=C3)C5=CC=CC=C5)C(=O)N2[C@H]1C(O)=O	4	4	4	-4.87127	-4	-4
OCC(O)COP([O-])([O-])=O	4		2	-4	-4	-4
CCC1=CC2=C(S1)N3C(C)=NN=C3CN=C2C4=C(Cl)C=CC=C4	3	4	2	-4	-4	-4
C[C@H](CSC(C)=O)C(=O)N1CCC[C@H]1C(=O)N[C@@H](CC2=CC=CC=C2)C(O)=O	4	1	4	-4.33563	-4	-4.20501
CCOC(=O)[C@H](CCC1=CC=CC=C1)N[C@H]2CCCN3CCC[C@H](N3C2=O)C(O)=O	4	4	4	-4	-4	-4
NC1=C2N=CN([C@@H]3O[C@H](CO)[C@@H](O)[C@@H]3O)C2=NC(F)=N1			1	-4	-4	-4
COC(=O)C1=C(C)NC(C)=C(C1C2=C(C=CC=C2)[N+]([O-])=O)C(=O)OCC(C)=O	4	4	4	-5.06003	-4.41003	-4.96003
CC1=C(N(CC2=CC=C(OCCN3CCCCCC3)C=C2)C4=C1C=C(O)C=C4)C5=CC=C(O)C=C5	4	4	1	-5.86003	-6.61003	-4
CC1=C(C)C(CC2=CNC=N2)=CC=C1	4	1	4	-6.91003	-6.06003	-5.81003
CC(C)[C@@H](C)\C=C\[C@@H](C)[C@H]1CC[C@@H]2[C@]1(C)CCC\C2=C/C=C3/C[C@@H](O)C[C@H](O)C3=C		1		-5.02127	-4.72127	-4.77127
CC(C)COC1=C(C=C(C=C1)C2=NC(C)=C(S2)C(O)=O)C#N	3	4	4	-4.56003	-4	-4
COC1=CC=CC(=C1)C(=O)CCN[C@@H](C)[C@H](O)C2=CC=CC=C2	3	1	4	-4.51003	-5.81003	-4.81003
CCN(CCO)CCN1C(CC2=CC=CC=C2)=NC3=C1C(=O)N(C)C(=O)N3C	2	4	2	-4	-4	-4
CCOC(=O)NNC1=NN=C(C=C1)N(CC)CC(C)O	4	4	4	-4	-4	-4.76003
CC(=O)N(CC(O)CO)C1=C(I)C(C(=O)NCC(O)CO)=C(I)C(C(=O)NCCO)=C1I	4	4	4	-4	-4	-4
COC1=C(OCC2CNC(=O)O2)C=CC=C1	4	3	4	-4	-4	-4
CCCC1=C2OC(=CC(=O)C2=CC3=C1N(CC)C(=CC3=O)C(O)=O)C(O)=O	1	4		-4	-4	-4
OC1C(COC(=O)C2=CN=CC=C2)(COC(=O)C3=CN=CC=C3)CCCC1(COC(=O)C4=CN=CC=C4)COC(=O)C5=CN=CC=C5	1	1		-5.61003	-4	-7.76003
CN1C(CSCC(F)(F)F)NC2=CC(Cl)=C(C=C2S1(=O)=O)S(N)(=O)=O	3	3	4	-4	-4	-4
CCCC(CCC)C(N)=O	4	4	4	-4	-4	-4
CN(C)CCOC1=CC2=C(SC3=C1C=C(Cl)C=C3)C=CC=C2	1	1	1	-4	-5.96003	-4.91003
CCO[C@H](CC1=CC=C(OCCC2=CC=C(OS(C)(=O)=O)C=C2)C=C1)C(O)=O	3	4	3	-4	-4	-4
CC1=CC=CC(C)=C1NC(=O)C2=CC(=C(Cl)C=C2O)S(N)(=O)=O	4	4	4	-4	-4	-4
COC[C@@H](N1CCN(C[C@H]1C)C2(C)CCN(CC2)C(=O)C3=C(C)N=CN=C3C)C4=CC=C(C=C4)C(F)(F)F	2	4	1	-4.33563	-4.61565	-4.64065
COC[C@H](N1CCN(C[C@@H]1C)C2(C)CCN(CC2)C(=O)C3=C(C)N=CN=C3C)C4=CC=C(C=C4)C(F)(F)F	1	1	2
C[C@H]1CNCCC2=CC=C(Cl)C=C12	4	2	1	-4	-5.71003	-4
COP(=S)(OC)OC1=CC=C(C=C1)S(N)(=O)=O	4	4	3	-5.36003	-4.61003	-4
COC(=O)N[C@H](C(=O)N[C@@H](CC1=CC=CC=C1)[C@@H](O)CN(CC2=CC=C(C=C2)C3=NC=CC=C3)NC(=O)[C@@H](NC(=O)OC)C(C)(C)C)C(C)(C)C	3	3	4	-4.96003	-4.36003	-5.91003
CN1CCC2=C(C1)C3=C(C=CC(C)=C3)N2CCC4=CN=C(C)C=C4	4	1	1	-4.97127	-5.07127	-4.97127
ClC1=CC(Cl)=C(C=C1)[C@@H]2CS\C(S2)=C(\C#N)N3C=CN=C3	1	3	4	-6.36003	-7.06003	-6.51003
CN1CCC(CC1)=C2C3=C(CCC4=C2N=CC=C4)C=CC=C3	1	3	4	-4	-5.11003	-4
CCC1(CC2=C(C1)C=CC=C2)C3=CNC=N3	4	1	4	-6.06003	-6.51003	-6.01003
CC1(C)OC[C@@H](COC(=O)CCC2=CC=C(OC[C@@H](O)CNCCNC(=O)N3CCOCC3)C=C2)O1	2	1	4	-4	-4	-4
FC1=C(Cl)C=C(NC2=C3C=C(NC(=O)C=C)C(OCCCN4CCOCC4)=CC3=NC=N2)C=C1	2	1	1	-4	-5.36003	-5.51003
CCCN(CCC)C(=O)CC1=C(N=C2C=CC(Cl)=CN12)C3=CC=C(Cl)C=C3	1	3	1	-4.91003	-4.86003	-5.41003
O=C(NCCCCC1CCN(CC1)C(=O)C2=CC=CC=C2)\C=C\C3=CN=CC=C3	4	4	1	-4.87127	-4.77127	-4
OC(CCN1CCCCC1)(C2CC3CC2C=C3)C4=CC=CC=C4	2	1	1	-4	-5.91003	-5.06003
CCNC(=O)NCCCOC1=CC=CC(CN2CCCCC2)=C1	4	1		-4.41003	-4.86003	-4.61003
CC1=CC=C(\C=N\N2C(=S)SC=C2C3=CC=CC=C3)C=C1	1	1		-5.36003	-4	-5.61003
CN(C(=S)OC1=CC2=C(CCC2)C=C1)C3=CC(C)=CC=C3	1	1	1	-4.81003	-4	-4.66003
CCC(C(=O)NC(=O)NC(C)=O)C1=CC=CC=C1	4	4	4	-4	-4	-4
CC(=O)SCC(CC(=O)C1=CC=C(C)C=C1)C(O)=O	2	1	4	-4.46003	-4	-4
CC(=O)OCC(=O)NC1=CC(=CC(NC(=O)COC(C)=O)=C1Cl)C#N	4	2	4	-4	-4	-4
ClC1=CC=C(C=C1)S(=O)(=O)NC(=O)NN2CCCC2	4	3	2	-4	-4	-4
O=C1[C@H]2[C@@H]3CC[C@@H](C3)[C@H]2C(=O)N1CCCCN4CCN(CC4)C5=NC=CC=N5	3	1	1	-4	-4.81003	-4
CC(C)(C)C1=NN=C(NS(=O)(=O)C2=CC=CC=C2)S1	4	4	4	-4.66003	-4	-4
O=C([C@H]1CCC(=O)N1)N2CCCCC2	4	4	1	-4	-4	-4
OC(=O)CNC(=O)CNC(=O)CNC(=O)CSC(=O)C1=CC=CC=C1	3	4	3	-4	-4	-4
CCN1C(NC2=CC=C(OCCN3CCCCC3)C=C2)C4=C(C=CC=C4)C1=O	4	1	1	-4	-4.56003	-4
CCOC(=O)CN1C=CC=C1C2=NC(=C(S2)C3=CC=C(OC)C=C3)C4=CC=C(OC)C=C4	1	1		-5.46003	-4	-4
CC(=O)OC1=CC=C(C=C1)C2(OC3=C(NC2=O)C=CC=C3)C4=CC=C(OC(C)=O)C=C4	1	1	1	-5.76003	-4	-4
CO[C@@]1(NC(=O)CSC(F)F)[C@@H]2OCC(CSC3=NN=NN3CCO)=C(N2C1=O)C(O)=O		4	2	-4	-4	-4
C[C@H](CN1CCCC1)C(=O)C2=CC=C(C=C2)C(F)(F)F	2	1	2	-4	-5.66003	-4
CC1=C(C=CC=C1)C(=O)NC2=CC(C)=C(C=C2)C(=O)N3CCCC(O)C4=C3C=CC(Cl)=C4	2	2	1	-4.74065	-4.66565	-5.21565
CC1=CC=CC=C1C(=O)NC2=CC=C(C(=O)N3CCC[C@@H](O)C4=CC(Cl)=CC=C34)C(C)=C2	4	1	1
CC(CCC1=CC2=C(OCO2)C=C1)NN	1			-4.81003	-4.56003	-4.66003
O=C(CCC1CCN(CC2=CC=CC=C2)CC1)C3=CC4=C(CCCCN4)C=C3	3	1	1	-4	-5.01003	-4
FC1=C(C=CC=C1)C2=N[C@@H](NC(=O)C3=CC4=C(N3)C=CC=C4)C(=O)N5CCC6=C5C2=CC=C6	1	3	1	-5.06003	-4	-4
CCCCCOC1=C(OCC)C=C(C=C1)C2SC(=O)NC2=O	1	4	3	-5.11003	-4	-5.36003
CC(C)CC1=CC=C(CCC2=CC3=C(S2)N4C(C)=NN=C4C(C)N=C3C5=C(Cl)C=CC=C5)C=C1	1	4	1	-4.81003	-4.56003	-4.81003
FC1=C(C=CC=C1)C2=N[C@H](NC(=O)C3=CC4=C(N3)C=CC=C4)C(=O)N5CCC6=C5C2=CC=C6	1	3	1	-5.16003	-4	-4
CC(C(O)=O)C1=CC=C(\C=C2/CCCCC2=O)C=C1	4	4	4	-4	-4	-4
CN1[C@H]2CC[C@@H]1C[C@@H](C2)NC(=O)N3C(=O)NC4=C3C=CC=C4	4	1	1	-4	-5.81003	-4
CCCCCC1NC2=CC(=C(C=C2S(=O)(=O)N1)S(N)(=O)=O)C(F)(F)F	2	2	2	-5.71003	-5.41003	-4
OC[C@@H](O)[C@H](CO)OCN1C=CN=C1[N+]([O-])=O	4			-4	-4	-4
COC1=CC(NS(=O)(=O)C2=CC=C(N)C=C2)=NC(C)=N1	2	4	4	-4	-4	-4
OC1=CC(=CC=C1)C2=C3C=CC(=N3)C(=C4C=CC(=N4)C(=C5C=CC(=N5)C(=C6CCC2=N6)C7=CC(O)=CC=C7)C8=CC(O)=CC=C8)C9=CC(O)=CC=C9	4	4
CO\N=C(\C(=O)N[C@H]1[C@H]2SCC(CN3N=NC(C)=N3)=C(N2C1=O)C(O)=O)C4=CSC(N)=N4	4	4	4	-4	-4	-4
CCOP(=O)(CC)OC1=CC=C(C=C1)[N+]([O-])=O	4	4	2	-4	-6.01003	-4
CCCCCCCCCCCCCCCCCCNC(=O)OC1CCN(CC1)C(=O)OC[C@H](COC(=O)N(CC2=[N+](CC)C=CC=C2)C(=O)C3=C(OC)C=CC=C3)OC	2	3	4	-4.41003	-4.76003	-4.41003
C\C(=N/O)C1=CC=C(OCC(=O)N2CCCCC2)C=C1	3	4	4	-4	-4	-4
CC(=O)C1=CC=C(OCC(=O)N2CCCCC2)C=C1	4	4	4	-4	-4	-4
CC1=NC(=CN1C2=CC=C(C=C2)[N+]([O-])=O)[N+]([O-])=O	4	4	4	-4	-4	-4
CCCN(CCC)C(=O)C(CCC(=O)OCCCN1CCN(CCOC(=O)CC2=C(C)N(C(=O)C3=CC=C(Cl)C=C3)C4=C2C=C(OC)C=C4)CC1)NC(=O)C5=CC=CC=C5	2	2	1	-5.46003	-5.11003	-5.71003
CCOC(=O)OCC\C(SC(=O)OCC)=C(/C)N(CC1=C(N)N=C(C)N=C1)C=O	1	2	1	-4	-5.66565	-5.14065
CCCOC(=O)CC1=CC(OC)=C(OCC(=O)N(CC)CC)C=C1	3	4	1	-4	-4	-5.56003
COC1=CC(=CC(OC)=C1OC)C(=O)NC2CCCNC2	4	4	4	-4	-4	-4
C(C1CN2CCC1CC2)N3C4=C(SC5=C3C=CC=C5)C=CC=C4	2	1	4	-4	-6.91003	-4
CC\C=C(/C(=O)N[C@H]1[C@H]2SCC(COC(N)=O)=C(N2C1=O)C(=O)OCOC(=O)C(C)(C)C)C3=CSC(N)=N3	1	1	1	-4.81003	-4	-5.63503
CCN(CC)CC1=NC=CN1C2=C(C=C(C=C2)[N+]([O-])=O)C(=O)C3=C(Cl)C=CC=C3	3	1	1	-4.81003	-5.71003	-5.76003
NC(=N)C1=CC=C(OCCCOC2=CC=C(C=C2)C(N)=N)C=C1	1	1	1	-4	-4	-4
CSCC[C@H](NC(=O)[C@H](CC1=CNC2=C1C=CC=C2)NC(=O)CCNC(=O)OC(C)(C)C)C(=O)N[C@@H](CC(O)=O)C(=O)N[C@@H](CC3=CC=CC=C3)C(N)=O	4	4	2	-4	-4.46003	-4.71003
CCO[C@@H]1OC(=O)C[C@@H]1NC(=O)[C@@H]2CCCN2C(=O)[C@@H](NC(=O)C3=CC(Cl)=C(N)C=C3)C(C)(C)C	4	3	1	-4.31063	-4	-5.79627
CC(COC1=CC=CC=C1)NN			4	-4.31063	-4.38563	-4.28563
COC(=O)C1=C(C)NC(COC(N)=O)=C(C1C2=C(Cl)C(Cl)=CC=C2)C(=O)OC(C)C	3	4	1	-5.36003	-4.71003	-5.56003
CCOC(=O)NC(C)(C)CC1=CC=C(Cl)C=C1	1	1	1	-4.81003	-4	-4
CCOC(=O)C1=CC=C(OCCN2C[C@H](O)[C@@H](O)[C@H](O)[C@H]2CO)C=C1	4	4	4	-4	-4	-4
FC1=CC=C(C=C1)N2CCN(CCCC(=O)NC3C4=C(CSC5=C3C=CC=C5)C=CC=C4)CC2	1	1	1	-5.06003	-5.36003	-5.16003
[truncated: 2,312 more rows]

## Sheet: Data Used For QSAR Modeling
Development of Robust QSAR Models for CYP2C9, CYP2D6, and CYP3A4 Catalysis and Inhibition
Eric Gonzalez*, Sankalp Jain*, Pranav Shah*, Nao Torimoto-Katori, Alexey Zakharov, Ðắc-Trung Nguyễn, Srilatha Sakamuru, Ruili Huang, Menghang Xia, R. Scott Obach, Cornelis E.C.A. Hop, Anton Simeonov & Xin Xu.
Drug Metabolism and Disposition
DMD-AR-2020-000320
Data used for QSAR Modeling
Headers:
SMILES	Chemical Structure
Substrate Class	Half-Life Class based on data derived from Supersome clearance assay: 0-30 min - 1; >30 min - 0; Blank - No Data
Activity Class	Activity Class based on data derived from P450-Glo assay: <10µM - 1; >10 µM - 0; Blank - No Data
Inhibitor Class	Data derived by combining data from Supersome clearance assay and P450-Glo Assay: 0 - Non Inhibitor; 1 - Inhibitor, subs/inhib: compound is a substrate but could also be an inhibitor. These compounds were not used in QSAR modeling for inhibitors; NA: Data not available due to missing value in one of the assays
SMILES	CYP2C9 Substrate Class	CYP2D6 Substrate Class	CYP3A4 Substrate Class	CYP2C9 Activity Class	CYP2D6 Activity Class	CYP3A4 Activity Class	CYP2C9 Inhibitor Class	CYP2D6 Inhibitor Class	CYP3A4_ Inhibitor Class
CC(C)(C)C1=C(O)C=CC(O)=C1	0	0	0	0	0	1	0	0	1
OC(=O)C\C(=C/C(O)=O)C(O)=O		0		0	0	0	NA	0	NA
CC(C)=CCC\C(C)=C\CO	0	1	0	0	0	0	0	0	0
CC1=CC(N)=C2C=C(NC(=O)NC3=CC4=C(C=C3)N=C(C)C=C4N)C=CC2=N1	0	0		0	1	0	0	1	NA
CC1=C(O)C(CN)=C(CO)C=N1	0	0	0	0	0	0	0	0	0
N[S+]([O-])(=O)C1=CC=C(C=C1)C(O)=O	0	0	1				NA	NA	NA
OC(CCN1CCCCC1)(C2=CC=CC=C2)C3=CC=CC=C3	0	1	0	0	1	0	0	subs/inhib	0
OC1=C(SC2=C(O)C=CC(Cl)=C2)C=C(Cl)C=C1	1	0	0	0	0	1	0	0	1
CN(C)CC\C=C1/C2=C(SC3=C1C=C(Cl)C=C3)C=CC=C2	1	1	1	0	1	0	0	subs/inhib	0
OP(O)(=O)OP(O)(O)=O	1		1	0	0	0	0	NA	0
CN(C)CCC=C1C2=C(C=CC=C2)C=CC3=C1C=CC=C3	0	1	0	0	1	0	0	subs/inhib	0
CCC1=C(C(=O)C2=CC(Br)=C(O)C(Br)=C2)C3=C(O1)C=CC=C3	1	0	0	1	0	1	subs/inhib	0	1
OC(=O)[C@@H]1CCCN1	0	0	0	0	0	0	0	0	0
OC(=O)CP(O)(O)=O	0	1		0	0	0	0	0	NA
CNCCC=C1C2=C(CCC3=C1C=CC=C3)C=CC=C2	0	1	0	0	1	0	0	subs/inhib	0
ClC1=CC=C2N(C3CCN(CCCN4C(=O)NC5=C4C=CC=C5)CC3)C(=O)NC2=C1	0	0	1	0	1	0	0	1	0
ClC1=C(C=CC=C1)C2=NC(=NO2)C3=CC=NC=C3	0	1	1	1	1	0	1	subs/inhib	0
CC1=C(C)C(NC2=NC(SCC(O)=O)=NC(Cl)=C2)=CC=C1	1	0	0	0	0	0	0	0	0
OC(=O)CCC1=NC(=C(O1)C2=CC=CC=C2)C3=CC=CC=C3	0	0	1	0	0	0	0	0	0
CC[C@@]1(O)C(=O)OCC2=C1C=C3N(CC4=C3N=C5C=CC(O)=C(CN(C)C)C5=C4)C2=O			0	0	0	0	NA	NA	0
NC(=O)C1=C(N)N(CC2=CC(Cl)=C(C(=O)C3=CC=C(Cl)C=C3)C(Cl)=C2)N=N1	0	0	1	0	0	1	0	0	subs/inhib
OC(=O)CCCCCCCC(O)=O	0	0		0	0	1	0	0	NA
ClC1=CC2=C(OC3=C(C=CC=C3)N=C2N4CCNCC4)C=C1	0	1	0	0	1	1	0	subs/inhib	1
CC(C)NCC(O)COC1=CC=C(CC(N)=O)C=C1	0	0	0				NA	NA	NA
CC(=O)C1=CC=C(C=C1)S(=O)(=O)NC(=O)NC2CCCCC2	0	0	0	0	0	0	0	0	0
NC12CC3CC(CC(C3)C1)C2	0	0	0	0	0	0	0	0	0
CCCCC\C=C/C\C=C/C\C=C/C\C=C/CCCC(=O)NCC(O)=O	1	1	1	0	0	0	0	0	0
OC1=CC=C(C=C1)C2=CC(=O)C3=C(O2)C=C(O)C=C3O	0	0	0	0	0	1	0	0	1
CC1=C(C)C(=O)C(CCCCC#CCCCC#CCO)=C(C)C1=O	1	0	1	1	1	1	subs/inhib	1	subs/inhib
NC1=C2CCCCC2=NC3=CC=CC=C13	0	1	0	0	1	0	0	subs/inhib	0
CN1C=NC(=C1SC2=NC=NC3=C2N=CN3)[N+]([O-])=O	0	0	1	0	0	0	0	0	0
NC1=NC2=C(N=CN2COCCO)C(=O)N1	0	0	0	0	0	0	0	0	0
CC(=O)OC1=C(C=CC=C1)C(O)=O	1			0	0	1	0	NA	NA
CCN(CC)CCNC(=O)C1=CC=C(NC(C)=O)C=C1	0	0	0	0	0	0	0	0	0
CC(=O)NC1=NN=C(S1)S(N)(=O)=O	0	0	0	0	0	0	0	0	0
COC(=O)C1=CCCN(C)C1	0	0		0	0	0	0	0	NA
C[N+]1(C)C2CCC1CC(C2)OC(=O)C(CO)C3=CC=CC=C3	0						NA	NA	NA
CCNC(=O)N1CCN(CCCC(C2=CC=C(F)C=C2)C3=CC=C(F)C=C3)CC1	1	1	1	0	1	0	0	subs/inhib	0
NC(=N)NC(=O)C1=NC(Cl)=C(N)N=C1N	0	0	0	0	0	0	0	0	0
NCCCCCC(O)=O		0	0	0	0	1	NA	0	1
CN(C)CCC=C1C2=C(CCC3=C1C=CC=C3)C=CC=C2	0	1	0	0	1	0	0	subs/inhib	0
CCCCC1=C(C(=O)C2=CC(I)=C(OCCN(CC)CC)C(I)=C2)C3=C(O1)C=CC=C3	1	0	1	1	0	0	subs/inhib	0	0
CC(C)NCC(O)COC1=C(CC=C)C=CC=C1	0	1	0	0	1	0	0	subs/inhib	0
CN(C)C1=NC(=NC(=N1)N(C)C)N(C)C	0	0	0	0	0	0	0	0	0
CCC1(CCC(=O)NC1=O)C2=CC=C(N)C=C2	0	0	0	0	0	0	0	0	0
COC1=CC=C(C=C1)C(=O)N2CCCC2=O	0	0	0	0	0	0	0	0	0
CC(COC1=CC=CC=C1)N(CCCl)CC2=CC=CC=C2	0		0	0	1	0	0	NA	0
CC(NC(C)(C)C)C(=O)C1=CC=CC(Cl)=C1	0	0	0	0	0	0	0	0	0
CCN1CCC2=C(CC1)N=C(N)O2	0	0		0	0	0	0	0	NA
CN(C)CCC(C1=CC=C(Br)C=C1)C2=CC=CC=N2	0	1	0				NA	NA	NA
N\C(NCC1=CC=CC=C1)=N/C(=O)C2=NC(Cl)=C(N)N=C2N	0	0	0	0	1	0	0	1	0
CCCCNC1=CC(=CC(=C1OC2=CC=CC=C2)S(N)(=O)=O)C(O)=O	0	0	0	0	0	0	0	0	0
CC(C)COCC(CN(CC1=CC=CC=C1)C2=CC=CC=C2)N3CCCC3	1	1	1	0	1	1	0	subs/inhib	subs/inhib
CC(C)NCC(O)COC1=CC=C(CCOCC2CC2)C=C1	0	1	0	0	0	0	0	0	0
O=C1CC2(CCCC2)CC(=O)N1CCCCN3CCN(CC3)C4=NC=CC=N4	0	1	1	0	0	0	0	0	0
NC(CO)C(=O)NNCC1=C(O)C(O)=C(O)C=C1		0		0	0	0	NA	0	NA
CN1C(C2=CC=C(Cl)C=C2)S(=O)(=O)CCC1=O	0	0	0	0	0	0	0	0	0
C(OC1=C(C=CC=C1)C2CC2)C3=NCCN3	0	1	0	0	1	0	0	subs/inhib	0
OC(=O)CCCC1=CC=C(C=C1)N(CCCl)CCCl	1	1	1	0	0	0	0	0	0
CC(C)(OC1=CC=C(C=C1)C2CC2(Cl)Cl)C(O)=O	0	0	0	0	0	0	0	0	0
O=C1CCC2=C(N1)C=CC(OCCCCC3=NN=NN3C4CCCCC4)=C2	0	0	0	1	0	0	1	0	0
CN1C=NC2=C1C(=O)N(C)C(=O)N2C	0	0	0	0	0	0	0	0	0
ClCCN(CCCl)P1(=O)NCCCO1	0	0	0	0	0	0	0	0	0
CCCNC(=O)N[S+]([O-])(=O)C1=CC=C(Cl)C=C1	0	0	0				NA	NA	NA
CN(C)CC[C@@H](C1=CC=C(Cl)C=C1)C2=NC=CC=C2	0	1	0	0	0	0	0	0	0
CN(C)CCC(C1=CC=C(Cl)C=C1)C2=CC=CC=N2	0	1	0				NA	NA	NA
NC(=O)N1C2=C(C=CC=C2)C=CC3=C1C=CC=C3	0	0	0	0	0	0	0	0	0
CCC1=CC(=CC=C1)N(C)C(=N)NC2=C3C=CC=CC3=CC=C2	0	1	0	0	1	0	0	subs/inhib	0
ClC1=CC2=C(OC(=O)N2)C=C1	0	0	0	0	0	0	0	0	0
NS(=O)(=O)C1=C(Cl)C=C2N=CNS(=O)(=O)C2=C1	0	0	0	0	0	0	0	0	0
ClC1=CC=C(CN2C(CN3CCCC3)=NC4=C2C=CC=C4)C=C1	1	1	1	0	1	1	0	subs/inhib	subs/inhib
ClC1=CC=CC(=C1)N2CCNCC2	0	1	1	0	1	0	0	subs/inhib	0
CN1CCC(CC1)=C2C3=C(C=CC=C3)C=CC4=C2C=CC=C4	0	1	0	0	1	0	0	subs/inhib	0
CN1CCN(CC1)C2=NC3=C(NC4=C2C=CC=C4)C=CC(Cl)=C3	1	1	0	0	0	0	0	0	0
CCN(CC)CCCC(C)NC1=CC=NC2=C1C=CC(Cl)=C2	0	1	0	0	0	0	0	0	0
CN(C)CCCN1C2=C(CCC3=C1C=C(Cl)C=C3)C=CC=C2	0	1	1	0	1	0	0	subs/inhib	0
CN(C1CCCCC1)C(=O)CCCOC2=CC3=C(NC(=O)C=C3)C=C2	0	0	1	0	0	1	0	0	subs/inhib
CN(C)CCCN1C2=C(SC3=C1C=C(Cl)C=C3)C=CC=C2	0	1	1	0	1	0	0	subs/inhib	0
CCN1N=C(C(O)=O)C(=O)C2=C1C=C3OCOC3=C2	0	0	0	0	0	0	0	0	0
CCCC(C)(COC(N)=O)COC(=O)NC(C)C	0	0	0	0	0	0	0	0	0
CN(C)CCOC(=O)COC1=CC=C(Cl)C=C1	1		1	0	0	0	0	NA	0
NS(=O)(=O)C1=C(Cl)C=C2NC(NS(=O)(=O)C2=C1)C3CC4CC3C=C4	1	0	0	0	0	0	0	0	0
FC1=CC=C(C=C1)C(OCCN2CCN(CCCC3=CC=CC=C3)CC2)C4=CC=C(F)C=C4	1	1	1	1	1	0	subs/inhib	subs/inhib	0
CC(CCC1=CC=C(O)C=C1)NCCC2=CC(O)=C(O)C=C2	1	1	1	0	0	1	0	0	subs/inhib
CN(C)CCOC(C1=CC=CC=C1)C2=CC=CC=C2	0	1	0	0	1	0	0	subs/inhib	0
CNCCCN1C2=C(CCC3=C1C=CC=C3)C=CC=C2	0	1	0	0	1	0	0	subs/inhib	0
OC1=NC(=O)C(N1)(C2=CC=CC=C2)C3=CC=CC=C3	0	0	0	0	0	0	0	0	0
OC1=C(O)C2=C(C=CC(=O)O2)C=C1	0		1	0	0	0	0	NA	0
CC(C)N(CCC(C(N)=O)(C1=CC=CC=C1)C2=NC=CC=C2)C(C)C	0	0	0	0	0	0	0	0	0
OC(=O)CN(CCN(CC(O)=O)CC(O)=O)CCN(CC(O)=O)CC(O)=O	0	0	0	0	0	0	0	0	0
CCCCCCCCCCCCCCC[C@H](O)[C@@H](N)CO	0	1	0	0	1	0	0	subs/inhib	0
OC1=CC=C(C=C1)C2=COC3=C(C=CC(O)=C3)C2=O	0	0	0	1	0	0	1	0	0
CCN(CC)CCOC(=O)C1(CCCCC1)C2CCCCC2	1	1	1	1	1	1	subs/inhib	subs/inhib	subs/inhib
NC(CC1=CC(O)=C(O)C=C1)C(O)=O	1			0	0	1	0	NA	NA
OCCN(CCO)C1=NC2=C(N=C(N=C2C(=N1)N3CCCCC3)N(CCO)CCO)N4CCCCC4	0	0	1	1	1	1	1	1	subs/inhib
NC1=NC(N)=NC(O)=C1	0			0	0	0	0	NA	NA
CCN(CC)C(=O)C1=CC(OC)=C(O)C=C1	0	0	0	0	0	0	0	0	0
CCC1=CC=CC2=C1NC3=C2CCOC3(CC)CC(O)=O	0	0	0	0	0	0	0	0	0
CSC1=CC=C(C=C1)C(=O)C2=C(C)NC(=O)N2	0	0	0	0	0	0	0	0	0
CCOC(=O)C1=CN=C2N(CC)N=CC2=C1NN=C(C)C	1	0	0	0	0	0	0	0	0
CN[C@@H](C)[C@H](O)C1=CC=CC=C1	1	0	0	0	0	0	0	0	0
CCC1(CC2=C(O1)C=CC=C2)C3=NCCN3	0	1	0	0	0	0	0	0	0
CCC1(C)CC(=O)NC1=O	1		0	0	0	0	0	NA	0
FC1=CC=C(C=C1)C(CCCN2CCC3(CC2)N(CNC3=O)C4=CC=CC=C4)C5=CC=C(F)C=C5	0	1	1	0	1	0	0	subs/inhib	0
CN1C(=O)N(CC2=CC=CO2)C3=C(NC(C)=N3)C1=O	0	0	0	0	0	0	0	0	0
CNCCC(OC1=CC=C(C=C1)C(F)(F)F)C2=CC=CC=C2	0	1	0	0	1	1	0	subs/inhib	1
NC(=O)OCC(COC(N)=O)C1=CC=CC=C1	1		1	0	0	0	0	NA	0
CC(CC1=CC=C(O)C=C1)NCC(O)C2=CC(O)=CC(O)=C2	0	1	0	0	0	0	0	0	0
OCCN1CCN(CCCN2C3=CC(=CC=C3SC4=C2C=CC=C4)C(F)(F)F)CC1	1	1	1	0	1	1	0	subs/inhib	subs/inhib
CC(C)OC(=O)C(C)(C)OC1=CC=C(C=C1)C(=O)C2=CC=C(Cl)C=C2	1	1	1	1	0	0	subs/inhib	0	0
O=C1NCC2(CCN(CCC3=CC=CC=C3)CC2)O1	0	0	0	0	0	0	0	0	0
CCOC(=O)C1=C2CN(C)C(=O)C3=C(C=CC(F)=C3)N2C=N1	0	0	0	0	0	0	0	0	0
CCCCC1=CC=C(N=C1)C(O)=O	0	0	0	0	0	0	0	0	0
FC1=CNC(=O)NC1=O		0	0	0	0	0	NA	0	0
FC(F)(F)COC1=CC=C(OCC(F)(F)F)C(=C1)C(=O)NCC2CCCCN2	0	1	0	0	1	0	0	subs/inhib	0
OC1=CC=C(C=C1)C2CNCCC3=C(Cl)C(O)=C(O)C=C23	0		0	0	0	0	0	NA	0
CCOC(=O)NC1=CC=C(NCC2=CC=C(F)C=C2)N=C1N	0	0	0	0	1	1	0	1	1
CC(C)C(=O)NC1=CC=C(C(=C1)C(F)(F)F)[N+]([O-])=O	0		1	0	0	0	0	NA	0
CC(C)(C(O)=O)C1=CC=C(C=C1)C(O)CCCN2CCC(CC2)C(O)(C3=CC=CC=C3)C4=CC=CC=C4	0	0	0	0	0	0	0	0	0
CCOC(=O)C1=C(C)NC(C)=C(C1C2=C(Cl)C(Cl)=CC=C2)C(=O)OC	1	0		1	0	1	subs/inhib	0	NA
CC1=NC=C(N=C1)C(=O)NCCC2=CC=C(C=C2)S(=O)(=O)NC(=O)NC3CCCCC3	0	0	0	0	0	0	0	0	0
CC1=NN=C(C2=CC=C(N)C=C2)C3=CC4=C(OCO4)C=C3C1	0	0	0	1	0	1	1	0	1
NCC1(CC(O)=O)CCCCC1	0	0	1	0	0	0	0	0	0
COC1=C(C=C(Cl)C=C1)C(=O)NCCC2=CC=C(C=C2)[S+]([O-])(=O)NC(=O)NC3CCCCC3	1	0	1	1	0	1	subs/inhib	0	subs/inhib
NC(=N)NC(=O)CC1=C(Cl)C=CC=C1Cl	0	0	0	0	0	0	0	0	0
NC1=NC2=C(N=CN2COC(CO)CO)C(=O)N1	0	0	0	0	0	0	0	0	0
OC1=CC=C(C=C1)C2=COC3=C(C(O)=CC(O)=C3)C2=O	0	0	0	0	0	0	0	0	0
CC[N+](CC)(CC)CCOC1=CC=CC(OCC[N+](CC)(CC)CC)=C1OCC[N+](CC)(CC)CC		0		0	0	0	NA	0	NA
OC1(CCN(CCCC(=O)C2=CC=C(F)C=C2)CC1)C3=CC=C(Cl)C=C3	0	0	1	0	1	0	0	1	0
NC1=C2C(O)CCCC2=NC3=CC=CC=C13	0	0	0	0	0	0	0	0	0
NS(=O)(=O)C1=C(Cl)C=C2NCNS(=O)(=O)C2=C1			0	0	0	0	NA	NA	0
NCCC1=CNC=N1	1		1	0	0	0	0	NA	0
OC1=CC=C(O)C=C1	0	0	0	0	0	1	0	0	1
CC(C)CC1=CC=C(C=C1)C(C)C(O)=O	0		0	0	0	0	0	NA	0
CC(C)C(=O)C1=C2C=CC=CN2N=C1C(C)C	1	0	0	0	0	0	0	0	0
CC(C)NCC(O)C1=CC(O)=C(O)C=C1	1	1		0	0	1	0	0	NA
C1CN=C(N1)C2COC3=C(O2)C=CC=C3	0	1	0	0	0	0	0	0	0
COC1=CC2=C(C=C1)N(C(=O)C3=CC=C(Cl)C=C3)C(C)=C2CC(O)=O	0	0	1	0	0	0	0	0	0
CN(C)CCCN1C2=C(CCC3=C1C=CC=C3)C=CC=C2	0	1	0	0	1	0	0	subs/inhib	0
CC(C)NNC(=O)C1=CC=NC=C1	0	0	1	0	0	0	0	0	0
CCN1C=CN=C1CC2COC3=C(O2)C=CC=C3	0	1	0	0	1	0	0	subs/inhib	0
CC(C(O)=O)C1=CC=CC(=C1)C(=O)C2=CC=CC=C2	0	0	0	0	0	1	0	0	1
CN1CCC(CC1)=C2C3=C(SC=C3)C(=O)CC4=C2C=CC=C4	0	0	0	0	1	0	0	1	0
O=C1N(C2=C(C=CC=C2)C1(CC3=CC=NC=C3)CC4=CC=NC=C4)C5=CC=CC=C5		0	1	1	0	1	NA	0	subs/inhib
CCN1C=C(C(O)=O)C(=O)C2=C1C(F)=C(N3CCNC(C)C3)C(F)=C2	0	0	0	0	0	0	0	0	0
NC1=NC(N)=C(N=N1)C2=CC=CC(Cl)=C2Cl	0	0	0	0	0	0	0	0	0
CN(C)C(=O)C(CCN1CCC(O)(CC1)C2=CC=C(Cl)C=C2)(C3=CC=CC=C3)C4=CC=CC=C4	0	0	1	0	1	0	0	1	0
OC(=O)C1=NN(CC2=C(Cl)C=C(Cl)C=C2)C3=C1C=CC=C3	0	0	0	0	0	0	0	0	0
CC1=C(C=NO1)C(=O)NC2=CC=C(C=C2)C(F)(F)F	0	0	0	0	0	1	0	0	1
CCN(CC)CC(=O)NC1=C(C)C=CC=C1C	0	1	0	0	0	0	0	0	0
CC1=C(C[S+]([O-])C2=NC3=C(N2)C=CC=C3)N=CC=C1OCC(F)(F)F	0		0	0	1	1	0	NA	1
CCOC(=O)N1CCC(CC1)=C2C3=CC=C(Cl)C=C3CCC4=C2N=CC=C4	0	1	1	1	1	0	1	subs/inhib	0
CCCN(CCC)C(=O)C(CCC(O)=O)NC(=O)C1=CC=CC=C1	0	0	0	0	0	0	0	0	0
CCN(CC)CCNC(=O)C1=CC(Cl)=C(N)C=C1OC	0	1	1	0	0	0	0	0	0
COC(=O)NC1=NC2=C(N1)C=CC(=C2)C(=O)C3=CC=CS3	0	0	0	0	0	0	0	0	0
COC1=C(NC2=NCCN2)C(Cl)=NC(C)=N1	0	1	0	0	0	0	0	0	0
CC(C)NCC(O)C1=CC(O)=CC(O)=C1	0	0	0	0	0	0	0	0	0
CN1CCN2C(C1)C3=C(CC4=C2C=CC=C4)C=CC=C3	1	1	1	0	1	0	0	subs/inhib	0
CC(N)COC1=C(C)C=CC=C1C	0	1	0	0	0	0	0	0	0
CCOC(=O)[N-]C1=C[N+](=NO1)N2CCOCC2	0	0	0	0	0	0	0	0	0
CN(CCCOC1=C(Cl)C=C(Cl)C=C1)CC#C	1	1	1	0	1	0	0	subs/inhib	0
OC1=CC(O)=C(C=C1)C2=C(O)C(=O)C3=C(O2)C=C(O)C=C3O	0	0	0	0	0	0	0	0	0
NC1=NC(=CC(N)=[N+]1[O-])N2CCCCC2	0	0	0	0	1	0	0	1	0
CC(C)C1=CC(OC(C)=O)=C(C)C=C1OCCN(C)C	1	1	1	0	1	0	0	subs/inhib	0
COC1=CC2=C(NC=C2CCNC(C)=O)C=C1	0	0	0	0	0	0	0	0	0
COC1=CC(=CC(OC)=C1OC)C(CCCN(C)CCC2=CC(OC)=C(OC)C=C2)(C#N)C(C)C	0	0	1	0	0	1	0	0	subs/inhib
COC1=CC(C(O)C(C)N)=C(OC)C=C1	0	1	0	0	0	0	0	0	0
CNC1(C)C2CCC(C2)C1(C)C	0		0	0	0	0	0	NA	0
CN(C)CCN(CC1=CC=CS1)C2=NC=CC=C2	0	1	0	0	1	0	0	subs/inhib	0
CC12CC3CC(C)(C1)CC(N)(C3)C2	0	0	0	0	0	0	0	0	0
CNCCCC12CCC(C3=C1C=CC=C3)C4=C2C=CC=C4	0	1		0	1	1	0	subs/inhib	NA
CCOC(=O)C1=C(C)NC(C)=C(C1C2=CC=CC(=C2)[N+]([O-])=O)C(=O)OC	1		1	1	0	1	subs/inhib	NA	subs/inhib
COCCOC(=O)C1=C(C)NC(C)=C(C1C2=CC(=CC=C2)[N+]([O-])=O)C(=O)OC(C)C	1	0	1	1	0	1	subs/inhib	0	subs/inhib
CNCCC(OC1=C(OC)C=CC=C1)C2=CC=CC=C2	0	1	0	0	1	0	0	subs/inhib	0
CC(CCC1=CC=CC=C1)NC(C)C(O)C2=CC=C(O)C=C2	0	1	0	0	1	0	0	subs/inhib	0
COC1=C(C=CC=C1)N2CCN(CC(O)COC3=C4C=CC=CC4=CC=C3)CC2	1	1	1	1	1	0	subs/inhib	subs/inhib	0
OC(=O)C1=C(NC2=CC(=CC=C2)C(F)(F)F)N=CC=C1	0	0	0	0	0	0	0	0	0
C[S+]([O-])(=O)NC1=C(OC2=CC=CC=C2)C=C(C=C1)[N+]([O-])=O	0	0	0				NA	NA	NA
O=C(CCNNC(=O)C1=CC=NC=C1)NCC2=CC=CC=C2	0	0	0	1	0	0	1	0	0
CN1CC(C2=CC=CC=C2)C3=CC=CC(N)=C3C1	0	1	0	0	1	0	0	subs/inhib	0
COC(=O)C1=C(C)NC(C)=C(C1C2=CC(=CC=C2)[N+]([O-])=O)C(=O)OCCN(C)CC3=CC=CC=C3	0	1	1	1	1	1	1	subs/inhib	subs/inhib
CC1(C)NC(=O)N(C1=O)C2=CC(=C(C=C2)[N+]([O-])=O)C(F)(F)F	0	0	0	1	0	0	1	0	0
CC1=NC(N)=C(CNC(=O)N(CCCl)N=O)C=N1	1	1	1	0	1	1	0	subs/inhib	subs/inhib
CN1CCN(CC1)C2CC3=C(SC4=C2C=C(Cl)C=C4)C=CC=C3	1	1	1	0	1	0	0	subs/inhib	0
CC1=CC(=C(O)C(C)=C1CC2=NCCN2)C(C)(C)C	0	1	0	0	1	0	0	subs/inhib	0
CCN(CC)CC#CCOC(=O)C(O)(C1CCCCC1)C2=CC=CC=C2		1	1	1	1	1	NA	subs/inhib	subs/inhib
CN(C)CCOC(C1=CC=CC=C1)C2=C(C)C=CC=C2	0	1	0	0	1	0	0	subs/inhib	0
CC1COC2=C(N3CCN(C)CC3)C(F)=CC4=C2N1C=C(C(O)=O)C4=O	0	0	0	0	0	0	0	0	0
O=C1NC2=C(C=CC=C2)N1CCCN3CCN(CC3)C(C4=CC=CC=C4)C5=CC=CC=C5	1	1	1	0	1	0	0	subs/inhib	0
CC1=C(CCN2CCC(CC2)C(=O)C3=CC=C(F)C=C3)C(=O)N4C=CC=CC4=N1	0	1	0	0	1	0	0	subs/inhib	0
CC(C)NCC(O)COC1=CC=CC2=C1C=CN2	0	1	0	0	0	0	0	0	0
CCCCCCCCCCCCCCCC(=O)NCCO	0	1	0	0	0	0	0	0	0
CC(C)NCC(O)COC1=C2C=CC=CC2=CC=C1	0	1	0				NA	NA	NA
CCCC(C(=O)OCCN(CC)CC)(C1=CC=CC=C1)C2=CC=CC=C2	1	1	1	1	1	1	subs/inhib	subs/inhib	subs/inhib
CN1C=NC2=C1C(=O)N(CCCCC(C)=O)C(=O)N2C	0	0	0	0	0	0	0	0	0
FC1=CC=C(C=C1)C(CCCN2CCC(CC2)N3C(=O)NC4=C3C=CC=C4)C5=CC=C(F)C=C5	0	1	1	0	1	0	0	subs/inhib	0
CC1=CN(C(=O)C=C1)C2=CC=CC=C2	0	0	0	0	0	0	0	0	0
COC1=CC2=CC=NC(CC3=CC(OC)=C(OC)C=C3)=C2C=C1OC	0	0	1	1	1	1	1	1	subs/inhib
CC(CN1C2=C(SC3=C1C=CC=C3)C=CC=C2)N(C)C	0	1	0	0	1	0	0	subs/inhib	0
O=C(C1CCCCC1)N2CC3N(CCC4=C3C=CC=C4)C(=O)C2	0	0	0	0	0	0	0	0	0
CCCNCC(O)COC1=C(C=CC=C1)C(=O)CCC2=CC=CC=C2	0	1	1	0	1	1	0	subs/inhib	subs/inhib
NC(=O)CN1CCCC1=O			0	0	0	0	NA	NA	0
COC1=CC=C(CN(CCN(C)C)C2=NC=CC=C2)C=C1	0	1	0	0	1	0	0	subs/inhib	0
CN1C(C(=O)NC2=CC=CC=N2)=C(O)C3=C(C=CC=C3)[S+]1([O-])=O	0	0	0	0	0	0	0	0	0
OCCN1CCN(CCCN2C3=C(SC4=C2C=C(Cl)C=C4)C=CC=C3)CC1	0	1	1	0	1	0	0	subs/inhib	0
CN(C)CCCN1C2=C(SC3=C1C=CC=C3)C=CC=C2	0	1	0	0	1	0	0	subs/inhib	0
NNCCC1=CC=CC=C1	0		0	0	1	0	0	NA	0
C[NH+](C)CCC(C1=CC=CC=C1)C2=CC=CC=[NH+]2	0		0				NA	NA	NA
NC(=O)C1=CN=CC=N1		1	0	0	0	0	NA	0	0
CCC1(C(=O)NCNC1=O)C2=CC=CC=C2	0	0	0	0	0	0	0	0	0
CCC(=O)C1=CC=C2SC3=C(C=CC=C3)N(CCCN(C)C)C2=C1	0	1	0	0	1	0	0	subs/inhib	0
CN(CC#C)CC1=CC=CC=C1	0	1	0	0	0	0	0	0	0
CCCCC1C(=O)N(N(C1=O)C2=CC=CC=C2)C3=CC=CC=C3	0	0	0	1	0	0	1	0	0
CNCCCC1C2=C(C=CC=C2)C=CC3=C1C=CC=C3	1	1	0	0	1	0	0	subs/inhib	0
CN1CCN(CCCN2C3=C(SC4=C2C=C(Cl)C=C4)C=CC=C3)CC1	0	1	1	0	1	0	0	subs/inhib	0
C(N1CCN(CC1)C2=NC=CC=N2)C3=CC=C4OCOC4=C3	0	1	0	0	1	1	0	subs/inhib	1
CCN(CC)CCNC(=O)C1=CC=C(N)C=C1	0	0	0	0	0	0	0	0	0
CCCNC(C)C(=O)NC1=C(C)C=CC=C1	0	0	0	0	0	0	0	0	0
CCCN1C=NC2=C1C(=O)N(CCCCC(C)=O)C(=O)N2C	0	0	0	0	0	0	0	0	0
CCN(CC)CCOC(=O)C1=CC=C(N)C=C1	0	0	0	0	0	0	0	0	0
OC1=CC2=C(C(O)=C1)C(=O)C(O)=C(O2)C3=CC(O)=C(O)C=C3	1	1	1	0	0	0	0	0	0
C1CN(CCN1)C2=NC3=CC=CC=C3C=C2	0	1	0	0	0	0	0	0	0
CCN(CC)CCCC(C)NC1=C2C=C(OC)C=CC2=NC3=C1C=CC(Cl)=C3	0	1	0	0	1	1	0	subs/inhib	1
CN\C(NCCSCC1=CC=C(CN(C)C)O1)=C/[N+]([O-])=O	0	0	0	0	0	0	0	0	0
CC1=C(CCN2CCC(CC2)=C(C3=CC=C(F)C=C3)C4=CC=C(F)C=C4)C(=O)N5C=CSC5=N1	0	1	1	0	1	0	0	subs/inhib	0
NC1=NC2=C(S1)C=C(OC(F)(F)F)C=C2	0	0	0	0	0	0	0	0	0
CC1=C(CCN2CCC(CC2)C3=NOC4=C3C=CC(F)=C4)C(=O)N5CCCCC5=N1	0	1	0	0	1	0	0	subs/inhib	0
C1CC1C(NC2=NCCO2)C3CC3	0	0	0	0	0	0	0	0	0
OC1=CC=C(C=C1)C2=C(C(=O)C3=CC=C(OCCN4CCCCC4)C=C3)C5=C(S2)C=C(O)C=C5	0	1	1	1	1	1	1	subs/inhib	subs/inhib
CCCN(CCC)CCC1=C2CC(=O)NC2=CC=C1	0	0	0	0	1	0	0	1	0
COC1=C(OCC(O)CN2CCN(CC(=O)NC3=C(C)C=CC=C3C)CC2)C=CC=C1	0	1	1	0	0	0	0	0	0
COC1=C(OC2CCCC2)C=C(C=C1)C3CNC(=O)C3	0	0	0	0	0	0	0	0	0
COC1=C(C=CC=C1)N2CCNCC2	1	1	0	0	0	0	0	0	0
O=C1NCN(C2=CC=CC=C2)C13CCN(CC4COC5=C(O4)C=CC=C5)CC3	1	1	1	1	1	1	subs/inhib	subs/inhib	subs/inhib
CN1C=CC2=CC3=C(CCN3C(=O)NC4=CC=CN=C4)C=C12	0	0	0	0	0	0	0	0	0
CNCC(O)C1=CC=C(O)C=C1	0			0	0	0	0	NA	NA
CC1=C(CC(O)=O)C2=C(C=CC(F)=C2)\C1=C/C3=CC=C(C=C3)S(C)(=O)=O	0	0		0	0	0	0	0	NA
NC1CCN(CC1)C2=NC(Cl)=CC=C2	0	1	0	0	1	0	0	subs/inhib	0
OCC1=C(O)C=CC(=C1)C(O)CNCCCCCCOCCCCC2=CC=CC=C2	0	1	1	0	1	1	0	subs/inhib	subs/inhib
CN\C(NC#N)=N/C1=CC=C(C=C1)C2=NNC(=O)CC2C	0	0	1	0	0	0	0	0	0
CC(C)(C)NCC(O)C1=CC(CO)=C(O)C=C1	0	0	0	0	0	0	0	0	0
C(CNC1=NC2=C(S1)C=CC=C2)COC3=CC=CC(CN4CCCCC4)=C3	0	1	1	0	1	1	0	subs/inhib	subs/inhib
FC1=CC=C(C=C1)C(=O)CCCN2CCC3(CC2)N(CNC3=O)C4=CC=CC=C4	1	1	0	0	1	0	0	subs/inhib	0
CCN1CCCC1CNC(=O)C2=C(OC)C=CC(=C2)[S+](N)([O-])=O	1	0	0				NA	NA	NA
CC1=C(CC(O)=O)C2=C(C=CC(F)=C2)\C1=C/C3=CC=C(C=C3)S(C)=O	0	0	0	0	0	0	0	0	0
OC1(CCN(CCCC(=O)C2=CC=C(F)C=C2)CC1)C3=CC=CC(=C3)C(F)(F)F	0	0	1	0	1	0	0	1	0
CCCCNC1=C(C(=O)OCC)C(C)=NC2=C1C=NN2CC	1	1	1	0	0	1	0	0	subs/inhib
CN1CCN(CC(=O)N2C3=C(C)SC=C3C(=O)NC4=C2C=CC=C4)CC1	0	0	0	0	0	0	0	0	0
O=C1N(C2CCC(=O)NC2=O)C(=O)C3=C1C=CC=C3	0	0	0	0	0	1	0	0	1
CCN(CC)CCNC(=O)C1=CC(=CC=C1OC)S(C)(=O)=O	0	0	0	0	0	0	0	0	0
NCC[S+](O)([O-])=O	1						NA	NA	NA
CCCCNC(=O)N[S+]([O-])(=O)C1=CC=C(C)C=C1	0	0	0	0	0	0	0	0	0
CCN(CC)C(=S)SSC(=S)N(CC)CC		0	0	1	0	1	NA	0	1
OC(CCN1CCCCC1)(C2CCCCC2)C3=CC=CC=C3	1	1	0	0	1	0	0	subs/inhib	0
CC1=CC=C(C=C1)[S+]([O-])(=O)NC(=O)NN2CCCCCC2	0	0	0	0	0	0	0	0	0
CC(C)(C)NCC(O)C1=CC(O)=CC(O)=C1	0	0	0	0	0	0	0	0	0
NCCC1=CC=C(O)C=C1			0	0	0	0	NA	NA	0
CN(C)CCCN1C2=CC(=CC=C2SC3=C1C=CC=C3)C(F)(F)F	1	1	0	0	1	0	0	subs/inhib	0
CC(CN(C)C)CN1C2=C(CCC3=C1C=CC=C3)C=CC=C2	1	1	0	0	1	1	0	subs/inhib	1
NC1=NC(N)=C2N=C(C3=CC=CC=C3)C(N)=NC2=N1	0	1	0	0	0	0	0	0	0
COC1=CC2=NC=NC(NC3=CC=CC(Cl)=C3)=C2C=C1OC	0	1	1	1	0	1	1	0	subs/inhib
C1CN=C(N1)C2CCCC3=C2C=CC=C3		1	0	0	1	0	NA	subs/inhib	0
CN1C=NC2=C1C(=O)NC(=O)N2C	0	0	0	0	0	0	0	0	0
COC1=CC2=NC(=NC(N)=C2C=C1OC)N3CCN(CC3)C(=O)C4CCCO4	0	0	0	0	0	0	0	0	0
OC(=O)CCCCC1CCSS1	0	0	0	0	0	0	0	0	0
CC(C)(C)NCC(O)C1=C(Cl)C=CC=C1	0	0	0	0	0	0	0	0	0
ClC1=CC(=CC=C1)N2CCN(CCCN3N=C4C=CC=CN4C3=O)CC2	0	1	1	0	0	0	0	0	0
OC1=C(O)C=C(C=C(C#N)C#N)C=C1	0	0	0	0	0	0	0	0	0
FC(F)(F)C1=C(C=CC=C1)N2C=CN=C2	0	0	0	0	1	1	0	1	1
CCCCNC1=CC=C(C=C1)C(=O)OCCN(C)C	0	1	1	0	0	0	0	0	0
COC1=CC(CC2=C(N)N=C(N)N=C2)=CC(OC)=C1OC	0	0	0	0	0	0	0	0	0
CN1[C@H]2CC[C@@H]1C[C@@H](C2)OC(=O)C3=CC(Cl)=CC(Cl)=C3	0	0	0	0	1	0	0	1	0
CSC1=CC2=C(SC3=C(C=CC=C3)N2CCC4CCCCN4C)C=C1	0	1	1	0	1	0	0	subs/inhib	0
CC(C)(C)C1=CC=C(C=C1)C(O)CCCN2CCC(CC2)C(O)(C3=CC=CC=C3)C4=CC=CC=C4	0	0	1	0	1	0	0	1	0
CCN(CC1=CC=NC=C1)C(=O)C(CO)C2=CC=CC=C2	0	0	1	1	0	0	1	0	0
COC1=C(C=CC=C1)N2CCN(CCCNC3=CC(=O)N(C)C(=O)N3C)CC2	0	1	0	0	1	0	0	subs/inhib	0
BrC1=C(NC2=NCCN2)C=CC3=NC=CN=C13	0	1	0	0	0	1	0	0	1
CCCCCCCCC(=O)NCC1=CC(OC)=C(O)C=C1	1	1	1	1	0	1	subs/inhib	0	subs/inhib
CC1=CC=CC(C)=C1NC2=NCCCS2	0	0	0	0	0	0	0	0	0
CC1=CC(=CC(C)=C1CC2=NCCN2)C(C)(C)C	0	1	1	0	1	0	0	subs/inhib	0
COC1=C(OC(F)F)C=CC(=C1)C2=NNC(=O)C=C2	0	0	0	0	1	0	0	1	0
CCN(CC)CCOC(=O)C(C1=CC=CC=C1)C2=CC=CC=C2	0	1	1	0	1	0	0	subs/inhib	0
CCCC1=CC(=O)NC(=S)N1	0	0	0	0	0	0	0	0	0
N[S+]([O-])(=O)C1=C(Cl)C=C(NCC2=CC=CO2)C(=C1)C(O)=O	0	0	0				NA	NA	NA
CC(C)(C(=O)C1=CN=CC=C1)C2=CN=CC=C2	0	0	0	0	0	1	0	0	1
NNC(=O)C1=CC=NC=C1	0	0	0	0	0	0	0	0	0
CCCN(CCC)[S+]([O-])(=O)C1=CC=C(C=C1)C(O)=O	0	0	0				NA	NA	NA
O=C1C(CCS(=O)C2=CC=CC=C2)C(=O)N(N1C3=CC=CC=C3)C4=CC=CC=C4	0	0	0	1	0	1	1	0	1
CCC1=C(C(N)=NC(N)=N1)C2=CC=C(Cl)C=C2	0	0	0	0	0	0	0	0	0
CN(C)C1=C(C)N(C)N(C1=O)C2=CC=CC=C2			0	0	0	0	NA	NA	0
CC1=CC(=O)C2=C(C=CC=C2)C1=O	0		0	0	0	1	0	NA	1
CCC(=C)C(=O)C1=CC=C(OCC(O)=O)C(Cl)=C1Cl	1	1	1	1	0	0	subs/inhib	0	0
CC1=C(O)C(CO)=C(CO)C=N1	0	0	0	0	0	0	0	0	0
OC(=O)C1=CC=CN=C1	0		0	0	0	0	0	NA	0
C(C1=NCCN1)C2=CC=CC=C2	0	0	0	0	0	0	0	0	0
CN1N(C(=O)C=C1C)C2=CC=CC=C2	0	0	0	0	0	0	0	0	0
CC1=CC=CC(NC2=C(C=CC=C2)C(O)=O)=C1C	1	0	0	0	0	0	0	0	0
NC1=CC=C(C=C1)C(=O)NCC(O)=O	0	0	0	0	0	0	0	0	0
NC1=NC2=C(O1)C=CC(Cl)=C2	0	0	0	0	0	0	0	0	0
CCOC1=CC=C(NC(C)=O)C=C1	0	0	0	0	0	0	0	0	0
C[N+]1(C)CCC(CC1)=C(C2=CC=CC=C2)C3=CC=CC=C3	0			0	0	0	0	NA	NA
NC1=CC=C(C=C1)S(N)(=O)=O			0	0	0	0	NA	NA	0
OC1=C(CC2=C(O)C3=C(OC2=O)C=CC=C3)C(=O)OC4=C1C=CC=C4	1	0	0	1	1	1	subs/inhib	1	1
NC1=CC=C(C=C1)[S+]([O-])(=O)NC2=NC=CC=N2	0	0	0	0	0	0	0	0	0
CC(C)[N+](C)(CCC(C(N)=O)(C1=CC=CC=C1)C2=CC=CC=C2)C(C)C	0			0	1	1	0	NA	NA
NC1=CC=C(C=C1)S(=O)(=O)NC2=NC=CS2	0	0	0	0	0	0	0	0	0
CC1=CC=C(C=C1)N(CC2=NCCN2)C3=CC=CC(O)=C3	0	1	0	0	1	0	0	subs/inhib	0
CCC1(CC)C(=O)NC=CC1=O	0	0	0	0	0	0	0	0	0
NC1=CC=C(C=C1)S(=O)(=O)C2=CC=C(N)C=C2	0	0	0	0	0	0	0	0	0
NC1=CC=C(C=C1)S(=O)(=O)NC2=NN=C(Cl)C=C2	0	0	0	0	0	0	0	0	0
COC1=NN=C(NS(=O)(=O)C2=CC=C(N)C=C2)C=C1	1	0	0	0	0	0	0	0	0
COC1=C2OC(C)=CC(=O)C2=C(OC)C3=C1OC=C3	0	0	0	0	0	1	0	0	1
CN1N(C(=O)C(N)=C1C)C2=CC=CC=C2	0		0	0	0	0	0	NA	0
OC(=O)C1=C(C=CC=C1)C(=O)NC2=CC=C(C=C2)[S+]([O-])(=O)NC3=NC=CS3	0	0	0				NA	NA	NA
CCCCOC1=CC(C(=O)NCCN(CC)CC)=C2C=CC=CC2=N1	0	1	0	0	1	0	0	subs/inhib	0
NC1=CC(C(O)=O)=C(O)C=C1	0		0	0	0	0	0	NA	0
CC1=CC(=O)OC2=C1C=CC(O)=C2	0	0	0	0	0	0	0	0	0
NS(=O)(=O)C1=C(Cl)C=C2N=C(CSCC3=CC=CC=C3)NS(=O)(=O)C2=C1	1	0	0	1	0	0	subs/inhib	0	0
CCOC(=O)C1=CC=C(N)C=C1	0	0	0	0	0	0	0	0	0
CCCCOC(=O)C1=CC=C(N)C=C1	0	0	0	0	0	1	0	0	1
CCCCOC(=O)C1=CC=C(O)C=C1	0	1	0	0	0	0	0	0	0
CC(=O)NC1=CC=C(O)C=C1	0		0	0	0	0	0	NA	0
CCCCNC1=CC=C(C=C1)C(=O)OCCOCCOCCOCCOCCOCCOCCOCCOCCOC	0	0	1	1	0	1	1	0	subs/inhib
OC(C1CCNCC1)(C2=CC=CC=C2)C3=CC=CC=C3	0	0	0	0	0	0	0	0	0
OC(=O)CCC(=O)NC1=CC=C(C=C1)S(=O)(=O)NC2=NC=CS2	0	0	0	0	0	0	0	0	0
N[S+]([O-])(=O)C1=CC(Cl)=C(Cl)C(=C1)[S+](N)([O-])=O	0	0	0	0	0	0	0	0	0
OC1=C(C=C(C=C1)[As](O)(O)=O)[N+]([O-])=O			0	0	0	0	NA	NA	0
CC(C)(C)CC(C)(C)C1=CC=C(OCCOCC[N+](C)(C)CC2=CC=CC=C2)C=C1	0		1	0	1	0	0	NA	0
NC(=O)NC1=CC=C(C=C1)[As](O)(O)=O	0	1	0	0	0	0	0	0	0
COC1=CC(NS(=O)(=O)C2=CC=C(N)C=C2)=NC(OC)=N1	0	0	0	0	0	0	0	0	0
CN(C(=O)CN(CCO)CC(=O)N(C)C(C)(C)CC1=CC=CC=C1)C(C)(C)CC2=CC=CC=C2	1	1	1	0	1	1	0	subs/inhib	subs/inhib
CN1C(=O)OC(C)(C)C1=O			1	0	0	0	NA	NA	0
CC1=NOC(NS(=O)(=O)C2=CC=C(N)C=C2)=C1C	0	0	0	0	0	0	0	0	0
NC1=CC=C(C=C1)S(=O)(=O)NC(=O)C2=CC=CC=C2	0	0	1	0	0	0	0	0	0
CC1=NC(NS(=O)(=O)C2=CC=C(N)C=C2)=NC=C1	0	0	1	0	0	0	0	0	0
OC1=C2N=CC=CC2=C(Cl)C=C1I	0	0	1	0	0	0	0	0	0
COC1=CC(O)=C(C=C1)C(=O)C2=C(O)C=CC=C2	1	1	1	0	0	0	0	0	0
COC1=CC(O)=C(C=C1)C(=O)C2=CC=CC=C2	0	0	0	0	0	0	0	0	0
CN1CCC(CC1)OC(C2=CC=CC=C2)C3=CC=CC=C3	0	1	0	0	1	0	0	subs/inhib	0
CN(C)CCCOC1=NN(CC2=CC=CC=C2)C3=C1C=CC=C3	0	1	0	0	1	0	0	subs/inhib	0
NS(=O)(=O)C1=C(C=C2NCNS(=O)(=O)C2=C1)C(F)(F)F		0		0	1	0	NA	1	NA
CC1=NN=C(NS(=O)(=O)C2=CC=C(N)C=C2)S1	0	0	0	0	0	0	0	0	0
NC1=CC=C(C=C1)S(=O)(=O)NC2=NC=CC=C2	0	0	0	0	0	0	0	0	0
S1C=NC(=C1)c2nc3ccccc3n2	0	0	0	0	0	0	0	0	0
CCCCN(CCCC)CCCOC(=O)C1=CC=C(N)C=C1	0	1	0	0	1	0	0	subs/inhib	0
COC1=C2OC(=O)C=CC2=CC3=C1OC=C3		0	0	1	1	0	NA	1	0
CN1CCN(CC1)C(C2=CC=CC=C2)C3=CC=CC=C3	1	1	0	0	1	0	0	subs/inhib	0
CC(C)C1=C(O)C(O)=C(C=O)C2=C1C=C(C)C(=C2O)C3=C(O)C4=C(C=O)C(O)=C(O)C(C(C)C)=C4C=C3C	0			0	0	0	0	NA	NA
CNNCC1=CC=C(C=C1)C(=O)NC(C)C	1	1		0	0	0	0	0	NA
CC1=NC=C(N1CCO)[N+]([O-])=O	0	0	0	0	0	0	0	0	0
OC1=CC=C(C=C1)[C@@H]2CC(=O)C3=C(O2)C=C(O)C=C3O	0	0	0	1	0	1	1	0	1
CN1C2=C(N(CCO)C=N2)C(=O)N(C)C1=O	0	1	0	0	0	0	0	0	0
OC(=O)C1=C(NC2=CC=CC(=C2)C(F)(F)F)C=CC=C1	0	0	0	0	0	0	0	0	0
CCC1=NC=CC(=C1)C(N)=S	0	0	0	0	0	0	0	0	0
CCCCOC1=CC=C(C=C1)C(=O)CCN2CCCCC2	0	1	0	0	1	0	0	subs/inhib	0
FC1=CC=C(C=C1)C(=O)CCCN2CCC(=CC2)N3C(=O)NC4=C3C=CC=C4	1	1	1	0	1	0	0	subs/inhib	0
CCCOC1=C(C=CC(N)=C1)C(=O)OCCN(CC)CC	0	1	0	0	1	0	0	subs/inhib	0
C(C1=NCCN1)C2=CC=C3C=CC=CC3=C2	0	1	0	0	0	0	0	0	0
CCCCCCCCCCCCCCCC[N+](C)(C)CCN(CC1=CC=C(OC)C=C1)C2=NC=CC=N2	0	0	0	0	1	0	0	1	0
COC1=CC(=CC(OC)=C1OC)C(=O)NCC2=CC=C(OCCN(C)C)C=C2	0	0	0	0	0	0	0	0	0
COC1=CC=C(C=C1)C(Cl)=C(C2=CC=C(OC)C=C2)C3=CC=C(OC)C=C3		1		1	0	0	NA	0	NA
CC(=O)OC1=CC=C(C=C1)C(C2=CC=C(OC(C)=O)C=C2)C3=NC=CC=C3	1	1	1	0	0	1	0	0	subs/inhib
COC1=C(OC)C2=C(C=C1)C=C3C4=C(CC[N+]3=C2)C=C5OCOC5=C4	0		0	0	1	1	0	NA	1
CC(C)NC(=N)NC(=N)NC1=CC=C(Cl)C=C1	0	0	1	0	1	0	0	1	0
CCCCOC1=CC=C(OCCCN2CCOCC2)C=C1	1	1	0	0	0	0	0	0	0
COC1=CN=C(NS(=O)(=O)C2=CC=C(N)C=C2)N=C1	0	0	0	0	0	0	0	0	0
CC1(C)OC(=O)NC1=O	0	0		0	0	0	0	0	NA
NC(=N)NC(=N)NCCC1=CC=CC=C1	0	0	0	0	1	0	0	1	0
CCCNC(C)(C)COC(=O)C1=CC=CC=C1	0	1	0	0	1	0	0	subs/inhib	0
CCOC1=CC2=CC=NC(CC3=CC(OCC)=C(OCC)C=C3)=C2C=C1OCC	1	1	1	1	0	0	subs/inhib	0	0
CC1=CC2=C(C=C1[S+](N)([O-])=O)[S+]([O-])(=O)CCC2	0	0	0	0	0	0	0	0	0
CN(C)C(=N)NC(N)=N	0	0		0	0	0	0	0	NA
CC(C)C[C@H](NC(C)=O)C(O)=O	0	0	0	0	0	0	0	0	0
CNC(C)(C)CC1=CC=CC=C1	0	1	1	0	0	0	0	0	0
COC1=CC(NS(=O)(=O)C2=CC=C(N)C=C2)=NC=N1	0	0	0	0	0	0	0	0	0
FC1=CC=C(C=C1)C(=O)CCCN2CCN(CC2)C3=CC=CC=N3		1	1	0	0	0	NA	0	0
NC1=NC(=O)NC=C1F	1	0	0	0	0	0	0	0	0
CC(C)\N=C1/C=C2N(C3=CC=C(Cl)C=C3)C4=C(C=CC=C4)N=C2C=C1NC5=CC=C(Cl)C=C5	0	0	1	1	1	1	1	1	subs/inhib
FC1=CC=C(C=C1)C(=O)CCCN2CCC(CC2)N3C(=O)NC4=C3C=CC=C4	0	1	1	0	1	0	0	subs/inhib	0
CN1N(C(=O)C(NC(=O)C2=CN=CC=C2)=C1C)C3=CC=CC=C3	0	0	0	0	0	0	0	0	0
CN(C(=S)OC1=CC2=C(C=CC=C2)C=C1)C3=CC(C)=CC=C3	1	1		0	0	1	0	0	NA
CCCCOC1=CC=C(CC(=O)NO)C=C1	0	0	0	0	0	0	0	0	0
COC1=NC=NC(NS(=O)(=O)C2=CC=C(N)C=C2)=C1OC	0	0	0	0	0	0	0	0	0
C(N(CC1=CC=CC=C1)C2=CC=CC=C2)C3=NCCN3		1	0	0	1	0	NA	subs/inhib	0
CCCCC1=NC(OCCN(C)C)=C2C=CC=CC2=C1	1	1	1	0	1	0	0	subs/inhib	0
CCN(CC)CCNC1=C2C(=O)C3=C(SC2=C(CO)C=C1)C=CC=C3	0	1	0	0	1	0	0	subs/inhib	0
NC(=N)NC(=N)N1CCOCC1	0	0	0	0	0	0	0	0	0
OC(CCCN1CCCCC1)(C2=CC=CC=C2)C3=CC=CC=C3	0	1	0	0	1	0	0	subs/inhib	0
CCN(CC)CCNC(=O)COC1=CC=C(OC)C=C1	1	1	0	0	0	0	0	0	0
CC1=CC=CC(C)=C1NC(=O)CN2CCN(CCCC(C3=CC=C(F)C=C3)C4=CC=C(F)C=C4)CC2	0	0	1	0	1	0	0	1	0
CN(C)CCCN1C2=CC(=CC=C2SC3=C1C=CC=C3)C(C)=O	0	1	0	0	1	0	0	subs/inhib	0
CC1=C(OC2=C(C=CC=C2C1=O)C(=O)OCCN3CCCCC3)C4=CC=CC=C4	1	1	1	0	1	1	0	subs/inhib	subs/inhib
CN(C(=O)C(Cl)Cl)C1=CC=C(OC(=O)C2=CC=CO2)C=C1	1	1	1	0	0	0	0	0	0
CCOC(=O)NNC1=C2C=CC=CC2=CN=N1	0	0	0	0	0	0	0	0	0
CC(=O)C1=CC=C2SC3=C(C=CC=C3)N(CCCN4CCC(CCO)CC4)C2=C1	0	1	0	0	1	0	0	subs/inhib	0
CC1=CC2=C(O1)C(C)=C3OC(=O)C=C(C)C3=C2	0	0	0	0	0	1	0	0	1
CCN(CC)CCNC(=O)C1=CC(Br)=C(N)C=C1OC	0	1	0	0	1	0	0	subs/inhib	0
OC(=O)CC1=CC=C(C=C1)C2=CC=CC=C2	0			0	0	0	0	NA	NA
COC1=C2OCOC2=CC3=C1CN(C)CC3	0	1		0	1	0	0	subs/inhib	NA
CCCCOC1=CC(=CC=C1N)C(=O)OCCN(CC)CC	0	1	0	0	1	0	0	subs/inhib	0
CN(C)CCN(CC1=CC=C(Cl)C=C1)C2=NC=CC=C2	0	1	1	0	1	0	0	subs/inhib	0
CN1C(COC(N)=O)=NC=C1[N+]([O-])=O	0	0	1	0	0	0	0	0	0
OC1(CCN(CCCC(=O)C2=CC=C(F)C=C2)CC1)C3=CC=C(Br)C=C3			1	0	1	0	NA	NA	0
COC1=C(OC)C(OC)=C(CN2CCNCC2)C=C1	0	0	0	0	0	0	0	0	0
CN1CCC(CC1)=C2C3=C(SC4=C2C=CC=C4)C=CC=C3	0	1	0	0	1	0	0	subs/inhib	0
CC1=C(Cl)C=CC=C1NC2=C(C=CC=C2)C(O)=O	1	0	0	0	0	0	0	0	0
CCCCC1=CC2=C(NC(NC(=O)OC)=N2)C=C1	0	0	0	0	1	0	0	1	0
CN1CCC[C@@H]1CCO[C@](C)(C2=CC=CC=C2)C3=CC=C(Cl)C=C3	0	1	1	0	1	1	0	subs/inhib	subs/inhib
CCN(CC)C1=CC(C)=NC2=NC=NN12	0	0		0	0	0	0	0	NA
CC(C)NC1=C(C)N(C)N(C1=O)C2=CC=CC=C2	0	0	1	0	0	0	0	0	0
COC1=CC(C)=NN1C2=NC(OC)=CC(C)=N2	1	0	0	0	0	0	0	0	0
CCS(=O)(=O)CCN1C(C)=NC=C1[N+]([O-])=O	0	0	0	0	0	0	0	0	0
COC1=CC(=CC(OC)=C1OC)C(=O)OCCCN2CCCN(CCCOC(=O)C3=CC(OC)=C(OC)C(OC)=C3)CC2	0	0	1	1	0	1	1	0	subs/inhib
COC1=CC2=CC=C(C=C2C=C1)[C@H](C)C(O)=O	0	0	1	0	0	0	0	0	0
CCOC(=O)N1C=CN(C)C1=S	0	0	0	0	0	0	0	0	0
OCCNC(=O)CN1C=CN=C1[N+]([O-])=O	0	0	1	0	0	0	0	0	0
NC1=C(CNC2CCC(O)CC2)C=C(Br)C=C1Br	0	0	1	0	1	0	0	1	0
COC1=C(C\C=C(/C)CCC(O)=O)C(O)=C2C(=O)OCC2=C1C	0	0	0	0	0	0	0	0	0
CC1=C(C=CC(OCCOCC[N+](C)(C)CC2=CC=CC=C2)=C1)C(C)(C)CC(C)(C)C	0	0		0	1	0	0	1	NA
CC1=CC(OCCCC(C)(C)C(O)=O)=C(C)C=C1	0	0	0	0	0	0	0	0	0
CC1=C(NCCN2CCOCC2)N=NC(=C1)C3=CC=CC=C3	0	1	0	0	1	1	0	subs/inhib	1
CC(C)(C)NC[C@H](O)COC1=NSN=C1N2CCOCC2	0	1	0	0	1	0	0	subs/inhib	0
CCCCC1(COC(=O)CCC(O)=O)C(=O)N(N(C1=O)C2=CC=CC=C2)C3=CC=CC=C3	0	0	0	0	0	0	0	0	0
CC(C)(C)NC[C@H](O)COC1=C2CCCC(=O)C2=CC=C1	0	1	0	0	0	0	0	0	0
OCCOCCOC(=O)C1=C(NC2=CC(=CC=C2)C(F)(F)F)C=CC=C1	1	0	1	0	0	0	0	0	0
COC(=O)NC1=NC2=C(N1)C=CC(=C2)C(=O)C3=CC=CC=C3	0	0	0	0	0	0	0	0	0
CCOC(=O)NC1=CC=C2SC3=C(C=CC=C3)N(C(=O)CCN4CCOCC4)C2=C1	0	0	1	0	0	1	0	0	subs/inhib
COC1=CC2=C(C=C1)C(C)(C)C(=O)N(CCC3=CC=C(C=C3)S(=O)(=O)NC(=O)NC4CCCCC4)C2=O	1	1	1	0	0	1	0	0	subs/inhib
ClC1=CC=C(OCC(=O)N2CCN(CC3=CC4=C(OCO4)C=C3)CC2)C=C1	1	1	0	0	1	1	0	subs/inhib	1
CN1C(C(=O)NC2=NOC(C)=C2)=C(O)C3=C(C=CC=C3)S1(=O)=O	0	0	0	0	0	0	0	0	0
COC1=CC(OC)=C(C(=O)CCCN2CCCC2)C(OC)=C1	0	0	0	0	0	0	0	0	0
OC(=O)CCC(=O)C1=CC=C(C=C1)C2=CC=CC=C2	0	0	0	0	0	0	0	0	0
CC(C)(OC1=CC=C(CCNC(=O)C2=CC=C(Cl)C=C2)C=C1)C(O)=O	0	0	0	0	0	0	0	0	0
COC1=CC2=C(C=C1)C=C(CCC(C)=O)C=C2	0	1	0	0	0	0	0	0	0
COC(=O)NC1=NC2=C(N1)C=CC(SC3=CC=CC=C3)=C2	0	0	0	0	0	0	0	0	0
CCN1C=C(C(O)=O)C(=O)C2=C1N=C(N=C2)N3CCNCC3	0	0	0	0	0	0	0	0	0
COC1=CC2=C(C=C1)N(C(=O)C3=CC=C(Cl)C=C3)C(C)=C2CC(=O)OCC(O)=O	1	0	0	0	0	0	0	0	0
ClC1=C(CN2CCC3=C(C2)C=CS3)C=CC=C1	1	1	1	1	1	0	subs/inhib	subs/inhib	0
NS(=O)(=O)C1=CC(=CC(N2CCCC2)=C1OC3=CC=CC=C3)C(O)=O	0	0	0	0	0	0	0	0	0
CC(C)NC(=O)NS(=O)(=O)C1=C(NC2=CC=CC(C)=C2)C=CN=C1	1	0	0	0	0	1	0	0	1
CN1C(C(=O)NC2=NC=CC=C2)=C(O)C3=C(C=CS3)S1(=O)=O	0	0	0	0	0	0	0	0	0
C[C@H](O)C(=O)NC1=C(I)C(C(=O)NC(CO)CO)=C(I)C(C(=O)NC(CO)CO)=C1I	1	0		0	0	0	0	0	NA
NC1=CC(=CNC1=O)C2=CC=NC=C2	0	0	0	0	0	1	0	0	1
CCC1=CC=CC(CC)=C1NC(=O)CN(CC(O)=O)CC(O)=O	0	0	0	0	0	0	0	0	0
COC1=CC=C(CCN2CCC(CC2)NC3=NC4=C(C=CC=C4)N3CC5=CC=C(F)C=C5)C=C1	1	1		0	1	0	0	subs/inhib	NA
CCN1C=C(C(O)=O)C(=O)C2=C1C=C(N3CCNCC3)C(F)=C2	0	0	0	0	0	0	0	0	0
COC1=CC2=C(NC(=N2)S(=O)CC3=C(C)C(OC)=C(C)C=N3)C=C1	0	0	1	0	0	0	0	0	0
CCN1C=C(C(O)=O)C(=O)C2=C1N=C(N3CCNCC3)C(F)=C2	0		0	0	0	0	0	NA	0
CN\C(NCCSCC1=CSC(CN(C)C)=N1)=C/[N+]([O-])=O	0	0	1				NA	NA	NA
C[C@H]1[C@H](NC(=O)C(=N\OC(C)(C)C(O)=O)\C2=CSC(N)=N2)C(=O)N1S(O)(=O)=O	0	0	0	0	0	0	0	0	0
COC1=CC(N)=C(Cl)C=C1C(=O)NC2CCN(CC3=CC=CC=C3)CC2	0	0	1	0	1	0	0	1	0
CCCN1CCC[C@@H]2CC3=NNC=C3C[C@@H]12	0	0	0	0	0	0	0	0	0
OC(=O)COC(=O)CC1=C(NC2=C(Cl)C=CC=C2Cl)C=CC=C1	1	0	0	0	0	0	0	0	0
OC(=O)C1=CN(C2CC2)C3=C(C=C(F)C(=C3)N4CCNCC4)C1=O	0	0	0	0	0	0	0	0	0
CCC1=C(C)CN(C(=O)NCCC2=CC=C(C=C2)[S+]([O-])(=O)NC(=O)NC3CCC(C)CC3)C1=O	0	0	0				NA	NA	NA
OC1=C(C2CCC(CC2)C3=CC=C(Cl)C=C3)C(=O)C4=C(C=CC=C4)C1=O			1				NA	NA	NA
N#CC1=CC=C(C=C1)C(N2C=NC=N2)C3=CC=C(C=C3)C#N	0	0	0	0	0	0	0	0	0
CCOC1=C(C=CC(CC(=O)N[C@@H](CC(C)C)C2=C(C=CC=C2)N3CCCCC3)=C1)C(O)=O	0	1	1	0	0	1	0	0	subs/inhib
CCCOC1=C(N)C=C(C=C1)C(=O)OCCN(CC)CC	0	1	0	0	1	0	0	subs/inhib	0
OC1=CC(=C(O)C=C1)[S+](O)([O-])=O	0	0	0	0	0	0	0	0	0
CN(C)[C@H]1[C@@H]2[C@@H](O)[C@@H]3C(=C)C4=C(Cl)C=CC(O)=C4C(=O)C3=C(O)[C@@]2(O)C(=O)C(C(N)=O)=C1O	0	0	0	0	0	0	0	0	0
CO\N=C(/C(=O)N[C@H]1[C@H]2SCC(C[N+]3(C)CCCC3)=C(N2C1=O)C(O)=O)C4=CSC(N)=N4		0		0	0	0	NA	0	NA
CCCCCCCCCCCC1=C(O)C(=O)C=C(O)C1=O	0		0	0	0	0	0	NA	0
CN1C=C2C[C@@H]3[C@H](C[C@@H](CNC(=O)OCC4=CC=CC=C4)CN3C)C5=C2C1=CC=C5	0	1	1	0	1	0	0	subs/inhib	0
CC[C@@H](CO)NC(=O)[C@H]1CN(C)[C@@H]2CC3=CNC4=C3C(=CC=C4)C2=C1	0	0	0	0	1	0	0	1	0
CO[C@]12C[C@@H](COC(=O)C3=CC(Br)=CN=C3)CN(C)[C@@H]1CC4=CN(C)C5=CC=CC2=C45	0	1	1	0	1	1	0	subs/inhib	subs/inhib
C\C(C=CC1=C(C)CCCC1(C)C)=C/C=C/C(C)=C/C(O)=O	0			0	0	0	0	NA	NA
CN(C)[C@H]1[C@@H]2C[C@H]3C(C(=O)C4=C(C=CC=C4O)[C@@]3(C)O)=C(O)[C@]2(O)C(=O)C(C(N)=O)=C1O	0	0	0	0	0	0	0	0	0
CCC(C)(C)C(=O)O[C@H]1C[C@@H](C)C=C2C=C[C@H](C)[C@H](CC[C@@H]3C[C@@H](O)CC(=O)O3)[C@@H]12	0	0	1	1	0	1	1	0	subs/inhib
OCC1=CC(=O)C(O)=CO1	0	0	0	0	0	0	0	0	0
COC1=C(OC)C2=C(C=C1)[C@H](OC2=O)[C@@H]3N(C)CCC4=CC5=C(OCO5)C=C34	1	0	1				NA	NA	NA
O[C@H]1CC2=C(O[C@@H]1C3=CC(O)=C(O)C=C3)C=C(O)C=C2O		1	1				NA	NA	NA
OC1=CC=C(\C=C\C2=CC(O)=CC(O)=C2)C=C1		0	0	1	0	1	NA	0	1
CN[C@@H]1[C@H](O)[C@H](NC)[C@H]2O[C@]3(O)[C@@H](O[C@H](C)CC3=O)O[C@@H]2[C@H]1O	0	0	1	0	0	0	0	0	0
COC1=CC2=C(C=C1OC)[C@H]3[C@@H](CO2)OC4=C(C=CC5=C4C[C@@H](O5)C(C)=C)C3=O	1	0	1	1	0	1	subs/inhib	0	subs/inhib
CCCN1C[C@H](CSC)C[C@H]2[C@H]1CC3=CNC4=C3C2=CC=C4	0	1	0	0	1	1	0	subs/inhib	1
CN1C[C@@H](C[C@H]2[C@H]1CC3=CNC4=C3C2=CC=C4)C(=O)N[C@]5(C)O[C@@]6(O)[C@@H]7CCCN7C(=O)[C@H](CC8=CC=CC=C8)N6C5=O	0	0	1	1	1	1	1	1	subs/inhib
CCC(=O)C1=CC=C(O)C=C1	0	0	0	0	0	0	0	0	0
OC1=C2N=CC=CC2=C(I)C=C1I	0	0	0	0	0	0	0	0	0
CN1C2=C(N(CC(O)CO)C=N2)C(=O)N(C)C1=O	0	1	0	0	0	0	0	0	0
O=S(=O)(N1CCCNCC1)C2=C3C=CN=CC3=CC=C2		1	0	0	1	0	NA	subs/inhib	0
FC1=CC=C(C=C1)C(N2CCN(C\C=C\C3=CC=CC=C3)CC2)C4=CC=C(F)C=C4	1	1	1	1	1	0	subs/inhib	subs/inhib	0
[O-]C(=O)CCCC1=CC=CC=C1	0		0	0	0	0	0	NA	0
CN1C2=C(NC=N2)C(=O)N(C)C1=O	0	0	0	0	0	0	0	0	0
CC(O)CN1C=NC2=C1C(=O)N(C)C(=O)N2C	0	0	0	0	0	0	0	0	0
CCCC1=C(OCCCCC2=NNN=N2)C=CC(C(C)=O)=C1O	0	0	0	1	0	1	1	0	1
CN(C)CCN(CC1=CC=CC=C1)C2=NC=CC=C2	0	1	0	0	1	0	0	subs/inhib	0
NC1=CC=C(\N=N\C2=CC=CC=C2)C(N)=N1	0	0	0	0	0	0	0	0	0
CC(C)OC1=CC2=C(C=C1)C(=O)C(=CO2)C3=CC=CC=C3	1		1	0	0	0	0	NA	0
CCN1CCN(CC1)C2=C(F)C=C3C(=O)C(=CN(C4CC4)C3=C2)C(O)=O	0	1	0	0	0	0	0	0	0
C\C=C(C1=CC=C(O)C=C1)\C(=C\C)C2=CC=C(O)C=C2	0		1	0	0	1	0	NA	subs/inhib
COC1=C(OC)C=C2C(N)=NC(=NC2=C1)N3CCN(CC3)C(=O)C4COC5=C(O4)C=CC=C5	0	0	1	0	0	0	0	0	0
C[N+]12CCC(CC1)C(C2)OC(=O)C(O)(C3=CC=CC=C3)C4=CC=CC=C4	0		1	0	0	0	0	NA	0
CC1CC2=C(C=CC=C2)N1NC(=O)C3=CC(=C(Cl)C=C3)S(N)(=O)=O	0	0	0	0	0	0	0	0	0
CCN1C=C(C(O)=O)C(=O)C2=C1N=C(C)C=C2	0	0	0	0	0	0	0	0	0
COC1=CC=C(\C=C\C(=O)NC2=CC=CC=C2C(O)=O)C=C1OC		0	0	0	0	0	NA	0	0
OC(CCN1CCCC1)(C2CCCCC2)C3=CC=CC=C3	0	1	0	0	1	0	0	subs/inhib	0
C(\C=C\C1=CC=CC=C1)N2CCN(CC2)C(C3=CC=CC=C3)C4=CC=CC=C4	1	1	1	1	1	0	subs/inhib	subs/inhib	0
COCCCC\C(C1=CC=C(C=C1)C(F)(F)F)=N/OCCN	0	1	0	0	1	1	0	subs/inhib	1
NS(=O)(=O)C1=C(C=C2NC(CC3=CC=CC=C3)NS(=O)(=O)C2=C1)C(F)(F)F	0	0	0	0	0	0	0	0	0
OC1=CC=C(C=C1)C2(OC(=O)C3=CC=CC=C23)C4=CC=C(O)C=C4	0	0	1	0	0	1	0	0	subs/inhib
CC[N+]1(C)CCCC(C1)OC(=O)C(O)(C2=CC=CC=C2)C3=CC=CC=C3	0			0	1	0	0	NA	NA
CCOC(=O)C1=C[C@]2(CC)CCCN3CCC4=C([C@H]23)N1C5=C4C=CC=C5	1	1	1	0	1	1	0	subs/inhib	subs/inhib
CN1CCCN=C1COC(=O)C(O)(C2CCCCC2)C3=CC=CC=C3	0	0	0	0	1	1	0	1	1
CC1CCC2=C3N1C=C(C(O)=O)C(=O)C3=CC(F)=C2	0	0	0	0	0	0	0	0	0
CN(C)CCOC(=O)C(C1=CC=CC=C1)C2(O)CCCC2	0	1	0	0	0	0	0	0	0
CCCC(=O)NC1=CC(C(C)=O)=C(OCC(O)CNC(C)C)C=C1	0	0	0	0	0	0	0	0	0
CC1=NN(C(=O)C1)C2=CC=CC=C2	0	0	0	0	0	0	0	0	0
CC(NCCC(C1=CC=CC=C1)C2=CC=CC=C2)C3=CC=CC=C3	1	1	1	0	1	1	0	subs/inhib	subs/inhib
OCC(O)CN1CCN(CC1)C2=CC=CC=C2	0	1		0	0	0	0	0	NA
NC(=N)N[S+]([O-])(=O)C1=CC=C(N)C=C1	0	0	0	0	0	0	0	0	0
COP(=O)(OC)C(O)C(Cl)(Cl)Cl	0	0		0	0	0	0	0	NA
CCCOC1=CC2=C(NC(NC(=O)OC)=N2)C=C1	0	0	0	0	0	0	0	0	0
CCC(NC(C)C)C(O)C1=CC=C(O)C(O)=C1	1		1	0	0	1	0	NA	subs/inhib
OC(=O)CCNC(=O)C1=CC=CC=C1	0	0	0	0	0	0	0	0	0
CC(=O)NS(=O)(=O)C1=CC=C(N)C=C1	0	1	1	0	0	0	0	0	0
CC1=CC(C)=NC(NS(=O)(=O)C2=CC=C(N)C=C2)=N1	0	0	0	0	0	0	0	0	0
CN1C(C(=O)NC2=NC=C(C)S2)=C(O)C3=CC=CC=C3[S+]1([O-])=O	0	0	0	0	0	0	0	0	0
CCOC1=CC2=C(C=C1)N=C(S2)S(N)(=O)=O	0	0	0	0	0	0	0	0	0
COC(=O)CCC(=O)CN	0	0	0	0	0	0	0	0	0
C1=CN(C=N1)C(C2=CC=CC=C2)C3=CC=C(C=C3)C4=CC=CC=C4	1	1	0	1	1	1	subs/inhib	subs/inhib	1
COC1=C(OCC(O)COC(N)=O)C=CC=C1	0	0	0	0	0	0	0	0	0
ClC1=CC=C(COC(CN2C=CN=C2)C3=C(Cl)C=C(Cl)C=C3)C=C1	1	0	1	1	1	1	subs/inhib	1	subs/inhib
C(C(C1CCCCC1)C2CCCCC2)C3CCCCN3	0	1	0	0	1	0	0	subs/inhib	0
CCC(COC(=O)C1=CC(OC)=C(OC)C(OC)=C1)(N(C)C)C2=CC=CC=C2	1	1		0	1	0	0	subs/inhib	NA
CN1CCCN(CC1)C(C2=CC=CC=C2)C3=CC=C(Cl)C=C3	0	1	0	0	1	0	0	subs/inhib	0
CC(=O)OC1=CC=CC2=C1C(=O)C3=C(OC(C)=O)C=C(C=C3C2=O)C(O)=O	1	1	1	0	1	1	0	subs/inhib	subs/inhib
CC1=NC=C(N1CC(O)CCl)[N+]([O-])=O	0	0	0	0	0	0	0	0	0
CCN(CCCCOC(=O)C1=CC(OC)=C(OC)C=C1)C(C)CC2=CC=C(OC)C=C2	0	1	1	0	1	1	0	subs/inhib	subs/inhib
CN1CCCCC1C(=O)NC2=C(C)C=CC=C2C	0	0	1	0	1	0	0	1	0
CC[C@H](NC(C)C)[C@H](O)C1=C2C=CC(=O)NC2=C(O)C=C1	0	0	0	0	0	0	0	0	0
ClC1=CC=C(COC(CN2C=CN=C2)C3=CC=C(Cl)C=C3Cl)C(Cl)=C1	1	0	1	1	1	1	subs/inhib	1	subs/inhib
CC(COC1=CC=CC=C1)NC(C)C(O)C2=CC=C(O)C=C2	0	1	0	0	1	0	0	subs/inhib	0
CC1=CC(CN2CCN(CC2)C(C3=CC=CC=C3)C4=CC=C(Cl)C=C4)=CC=C1	1	0	1	0	1	1	0	1	subs/inhib
CCCCCCCCNC(C)C(O)C1=CC=C(SC(C)C)C=C1	1	1	1	0	1	0	0	subs/inhib	0
CCN(CCCC1=CC=CC=C1)CCCC2=CC=CC=C2	1	1	0	0	1	0	0	subs/inhib	0
CC(=O)NC1=C(I)C(C(O)=O)=C(I)C(NC(C)=O)=C1I		0	0	0	0	0	NA	0	0
CCC(C(=O)OCCN(CC)CC)C1=CC=CC=C1	0	1	0	0	1	0	0	subs/inhib	0
[O-]C(=O)CC1=C(NC2=C(Cl)C=CC=C2Cl)C=CC=C1		0		0	0	0	NA	0	NA
CN(C)CCOC1=C(CC2=CC=CC=C2)C=CC=C1	0	1	0	0	1	0	0	subs/inhib	0
CN1CCN(CC1)C2=NC3=C(OC4=C2C=C(Cl)C=C4)C=CC=C3	0	1	1	0	1	0	0	subs/inhib	0
FC1=CC=C(C=C1)C(=O)C2CCN(CCN3C(=O)NC4=C(C=CC=C4)C3=O)CC2	1	0	1	0	1	0	0	1	0
CN(C)CCOC(C)(C1=CC=CC=C1)C2=NC=CC=C2	0	1	0	0	0	0	0	0	0
COCCC1=CC=C(OCC(O)CNC(C)C)C=C1	0	1	0	0	0	0	0	0	0
OC(=O)C1=CC2=CC=CC=C2C(CC3=C(O)C(=CC4=CC=CC=C34)C(O)=O)=C1O	0						NA	NA	NA
CC(=O)OCC(=O)[C@@]1(O)CC[C@H]2[C@@H]3CCC4=CC(=O)CC[C@]4(C)[C@H]3C(=O)C[C@]12C	0	1	1	0	1	0	0	subs/inhib	0
CC(=O)OCC(=O)[C@@]12OC3(CCCC3)O[C@@H]1C[C@H]4[C@@H]5CCC6=CC(=O)C=C[C@]6(C)[C@@]5(F)[C@@H](O)C[C@]24C	1	1	1	0	0	0	0	0	0
NC(N)=NC1=NC(CSCC\C(N)=N/S(N)(=O)=O)=CS1	0	0		0	0	0	0	0	NA
C[C@]12CC[C@H]3[C@@H](CCC4=CC(=O)CC[C@]34C)[C@@H]1CC[C@]2(O)C(=O)CO	0	0	1	0	0	0	0	0	0
CCCCCC(=O)O[C@@]1(CC[C@H]2[C@@H]3CCC4=CC(=O)CC[C@]4(C)[C@H]3CC[C@]12C)C(C)=O	1	0	1	1	0	1	subs/inhib	0	subs/inhib
C[C@]12CC[C@H]3[C@@H](CCC4=CC(OC(=O)C5=CC=CC=C5)=CC=C34)[C@@H]1CC[C@@H]2O	1	1	1	0	0	0	0	0	0
CC(=O)OCC(=O)[C@@]1(O)CCC2C3CCC4=CC(=O)CC[C@]4(C)C3[C@@H](O)C[C@]12C	0	0	0	0	0	0	0	0	0
CC1(C)O[C@@H]2C[C@H]3[C@@H]4C[C@H](F)C5=CC(=O)C=C[C@]5(C)[C@@]4(F)[C@@H](O)C[C@]3(C)[C@@]2(O1)C(=O)CO	0	0		0	0	0	0	0	NA
C[C@]12CC[C@H]3[C@@H](CCC4=CC(=O)CC[C@]34C)[C@@H]1CC[C@@H]2C(=O)CO	0	0	1	0	0	0	0	0	0
CCCC1O[C@@H]2C[C@H]3[C@@H]4CCC5=CC(=O)C=C[C@]5(C)[C@H]4[C@@H](O)C[C@]3(C)[C@@]2(O1)C(=O)CO	1	0	1	0	0	1	0	0	subs/inhib
C[C@]12CC[C@H]3[C@@H](CCC4=CC(=O)CC[C@]34C)[C@@H]1CC[C@@]2(O)C#C	0	0	1	0	0	1	0	0	subs/inhib
CCOC(=O)[C@H](CCC1=CC=CC=C1)N[C@@H](C)C(=O)N2CCC[C@H]2C(O)=O	0	0	1	0	0	0	0	0	0
C[C@H]1C[C@H]2[C@@H]3CC[C@](O)(C(C)=O)[C@@]3(C)C[C@H](O)[C@]2(F)[C@@]4(C)C=CC(=O)C=C14	0	0	1	1	0	0	1	0	0
CC(C)(C)NCC(O)COC1=C2C[C@H](O)[C@H](O)CC2=CC=C1	1	0	0	0	0	0	0	0	0
OC1=C2O[C@H]3C(=C)CC[C@@]4(O)[C@H]5CC(C=C1)=C2[C@@]34CCN5CC6CC6	0	0	0	0	1	0	0	1	0
C[C@@H]1C[C@H]2[C@@H]3C[C@H](F)C4=CC(=O)C=C[C@]4(C)[C@@]3(F)[C@@H](O)C[C@]2(C)[C@@]1(O)C(=O)CO	0	0	1	0	0	0	0	0	0
CC(=O)OCC(=O)[C@@]1(O)CC[C@H]2[C@@H]3CCC4=CC(=O)C=C[C@]4(C)[C@H]3[C@@H](O)C[C@]12C	0	0	1	0	0	0	0	0	0
COC1=CC(=CC(OC)=C1OC)[C@H]2[C@@H]3[C@H](COC3=O)[C@@H](O)C4=C2C=C5OCOC5=C4	0	0	0	1	0	1	1	0	1
C[C@H]1C[C@H]2[C@@H]3C[C@H](F)C4=CC(=O)C=C[C@]4(C)[C@@]3(F)[C@@H](O)C[C@]2(C)[C@@]1(OC(C)=O)C(=O)COC(C)=O	0	0	1	0	0	0	0	0	0
CCCC(=O)O[C@@]1([C@@H](C)C[C@H]2[C@@H]3CCC4=CC(=O)C=C[C@]4(C)[C@@]3(F)C(=O)C[C@]12C)C(=O)CCl	1	0	0	0	1	1	0	1	1
CC(=O)OCC(=O)[C@H]1CC[C@H]2[C@@H]3CCC4=CC(=O)CC[C@]4(C)[C@H]3CC[C@]12C	1	1	1	1	0	0	subs/inhib	0	0
CC(C)C[C@@H]1N2C(=O)[C@](NC(=O)[C@H]3CN(C)C4CC5=C(Br)NC6=CC=CC(=C56)C4=C3)(O[C@@]2(O)[C@@H]7CCCN7C1=O)C(C)C	0	0	1				NA	NA	NA
CC(=O)OC[C@H]1O[C@H]([C@H](OC(C)=O)[C@@H]1OC(C)=O)N2N=CC(=O)NC2=O	1	1	0	0	1	0	0	subs/inhib	0
CC(=O)OCC(=O)[C@@]12OC(C)(C)O[C@@H]1C[C@H]3[C@@H]4C[C@H](F)C5=CC(=O)C=C[C@]5(C)[C@@]4(F)[C@@H](O)C[C@]23C	0	1	0	1	0	0	1	0	0
C[C@@H]1C[C@H]2[C@@H]3C[C@H](F)C4=CC(=O)C=C[C@]4(C)[C@@]3(F)[C@@H](O)C[C@]2(C)[C@@]1(O)C(=O)COC(=O)C(C)(C)C	0	0	1	1	0	1	1	0	subs/inhib
C[C@]12C[C@H](O)[C@H]3[C@@H](CCC4=CC(=O)CC[C@]34C)[C@@H]1CC[C@@H]2C(=O)CO	0	0	0	0	0	0	0	0	0
NC1=NC(Cl)=NC2=C1N=CN2[C@H]3C[C@H](O)[C@@H](CO)O3	0	0	0	0	0	0	0	0	0
C[C@@H]1C[C@H]2[C@@H]3CCC4=CC(=O)C=C[C@]4(C)[C@@]3(F)[C@@H](O)C[C@]2(C)[C@@]1(O)C(=O)COC(C)=O	1	1	1	0	0	0	0	0	0
CC(=O)O[C@@]1(CC[C@H]2[C@@H]3C=C(Cl)C4=CC(=O)CC[C@]4(C)[C@H]3CC[C@]12C)C(C)=O	0	0	1	1	0	0	1	0	0
C[N+]1(C)[C@H]2C[C@@H](C[C@@H]1[C@H]3O[C@@H]23)OC(=O)[C@H](CO)C4=CC=CC=C4	0			0	0	0	0	NA	NA
C[C@H]1C[C@H]2[C@@H]3CC[C@](O)(C(=O)CO)[C@@]3(C)C[C@H](O)[C@@H]2[C@@]4(C)C=CC(=O)C=C14	0	0	1	0	0	0	0	0	0
C[C@]12C[C@H](O)[C@H]3[C@@H](CCC4=CC(=O)CC[C@]34C)[C@@H]1CC[C@]2(O)C(=O)CO	0	0	0	0	0	0	0	0	0
CC1=NC2=C(C=C(Cl)C=C2)S(=O)(=O)N1	0	0	0	0	0	0	0	0	0
C[C@H]1C[C@H]2[C@@H]3CC[C@](O)(C(C)=O)[C@@]3(C)CC[C@@H]2[C@@]4(C)CCC(=O)C=C14	0	0	1	0	0	0	0	0	0
CC(=O)[C@H]1CC[C@H]2[C@@H]3CC[C@H]4C[C@H](O)CC[C@]4(C)[C@H]3C(=O)C[C@]12C	1	0	1	1	0	0	subs/inhib	0	0
CC1(C)O[C@@H]2C[C@H]3[C@@H]4CCC5=CC(=O)C=C[C@]5(C)[C@@]4(F)[C@@H](O)C[C@]3(C)[C@@]2(O1)C(=O)CO	1	0	1	0	0	0	0	0	0
COC1=C(OC)C2=C(C=C1)[C@H](OC2=O)[C@@H]3N(C)CCC4=CC5=C(OCO5)C(OC)=C34	1	0	1	1	1	1	subs/inhib	1	subs/inhib
CC1(C)O[C@@H]2C[C@H]3[C@@H]4C[C@H](F)C5=CC(=O)CC[C@]5(C)[C@H]4[C@@H](O)C[C@]3(C)[C@@]2(O1)C(=O)CO	0	0	1	0	0	0	0	0	0
CC[C@H]1[C@@H](CC2=CN=CN2C)COC1=O	0	0	0	0	0	0	0	0	0
CCC(=O)O[C@@]1([C@@H](C)C[C@H]2[C@@H]3CCC4=CC(=O)C=C[C@]4(C)[C@@]3(F)[C@@H](O)C[C@]12C)C(=O)CCl	0	0	1	0	0	0	0	0	0
CC[C@H](C)C(=O)O[C@H]1C[C@@H](C)C=C2C=C[C@H](C)[C@H](CC[C@@H]3C[C@@H](O)CC(=O)O3)[C@@H]12	1	0	1	0	0	1	0	0	subs/inhib
C[C@]12CC[C@H]3[C@@H](CCC4=CC(O)=CC=C34)[C@@H]1CCC2=O	1	0	1	1	0	0	subs/inhib	0	0
C[C@@H]1C[C@H]2[C@@H]3CCC4=CC(=O)C=C[C@]4(C)[C@@]3(F)[C@@H](O)C[C@]2(C)[C@H]1C(=O)CO	0	0	1	0	0	0	0	0	0
C[C@H](CS)C(=O)N1CCC[C@H]1C(O)=O	0	0	0	0	0	0	0	0	0
OC[C@H]1O[C@H](C[C@@H]1O)N2C=C(F)C(=O)NC2=O	0	0	0	0	0	0	0	0	0
C[C@]12CC[C@H]3[C@@H](CCC4=CC(=O)CC[C@]34C)[C@@H]1CCC2=O	0	0	1	0	0	0	0	0	0
C[C@]12CC(=O)[C@H]3[C@@H](CCC4=CC(=O)CC[C@]34C)[C@@H]1CC[C@]2(O)C(=O)CO	0	1	0	0	0	0	0	0	0
CC1=CN([C@H]2C[C@H](N=[N+]=[N-])[C@@H](CO)O2)C(=O)NC1=O	0	0	0	0	0	0	0	0	0
CCCCC(=O)O[C@@]1(CC[C@H]2[C@@H]3CCC4=CC(=O)CC[C@]4(C)[C@H]3[C@@H](O)C[C@]12C)C(=O)CO	0	0	1	0	0	0	0	0	0
C[C@H](CCC(O)=O)[C@H]1CC[C@H]2[C@H]3[C@H](CC(=O)[C@]12C)[C@@]4(C)CCC(=O)C[C@H]4CC3=O	0	0	0	0	0	0	0	0	0
CC[C@@H](CO)NC(=O)[C@H]1CN(C)[C@@H]2CC3=CN(C)C4=CC=CC(=C34)C2=C1	0	1	0	0	0	0	0	0	0
CC(=O)O[C@@]1(CC[C@H]2[C@@H]3C=C(C)C4=CC(=O)CC[C@]4(C)[C@H]3CC[C@]12C)C(C)=O	0	0	1	0	0	0	0	0	0
COC1=CC=CC2=C1C(=O)C3=C(O)C4=C(C[C@](O)(C[C@@H]4O[C@H]5C[C@H](N)[C@H](O)[C@H](C)O5)C(C)=O)C(O)=C3C2=O	0	0	0	0	0	0	0	0	0
CNC[C@H](O)C1=CC=CC(O)=C1	1	0	0	0	0	0	0	0	0
COC1=CC=C(C=C1)[C@@H]2SC3=C(C=CC=C3)N(CCN(C)C)C(=O)[C@@H]2OC(C)=O	0	0	1	0	0	1	0	0	subs/inhib
CN1[C@H]2CC(C[C@@H]1[C@H]3O[C@@H]23)OC(=O)[C@H](CO)C4=CC=CC=C4	0	1	0				NA	NA	NA
CC[C@H]1CN2CCC3=CC(OC)=C(OC)C=C3[C@@H]2C[C@@H]1C[C@H]4NCCC5=CC(OC)=C(OC)C=C45		1	0	0	0	0	NA	0	0
OC1=C2O[C@H]3C(=O)CC[C@@]4(O)[C@H]5CC(C=C1)=C2[C@@]34CCN5CC6CC6	0	0	0	0	1	0	0	1	0
CCCCN1C[C@H](O)[C@@H](O)[C@H](O)[C@H]1CO	0	0		0	0	0	0	0	NA
NC\C=C\C(O)=O		1		0	0	0	NA	0	NA
CC(=C)[C@H]1CN[C@@H]([C@H]1CC(O)=O)C(O)=O	0	0	0	0	0	0	0	0	0
CN1C(=O)COC2=C1C=C(Cl)C=C2C(=O)NC3CN4CCC3CC4	0	0	0	0	0	0	0	0	0
O=C1CC2(CCCC2)CC(=O)N1CCNCC3COC4=C(O3)C=CC=C4	0	1	1	0	1	1	0	subs/inhib	subs/inhib
CC(C)NCC(O)C1=CC(C#N)=C(N)C=C1	0	0	0	0	0	0	0	0	0
CCN(CC)CCOCCOC(=O)C1(CCCC1)C2=CC=CC=C2	0	1	1	0	1	1	0	subs/inhib	subs/inhib
CN(C)CCCSC1=C(NC(=O)\C=C\C2=CC=CC=C2)C=CC=C1	0	1	0	0	1	0	0	subs/inhib	0
NP(N)(=O)NC(=O)C1=CC=C(F)C=C1	0		1	0	0	0	0	NA	0
OC(=O)CN1C(=O)C2=CC=CC3=CC=CC(C1=O)=C23	0	0	0	0	0	0	0	0	0
CN(C)CC\C=C1/C2=C(COC3=C1C=CC=C3)C=CC=C2	0	1	0	0	1	0	0	subs/inhib	0
FC1=CC=C(OCCCN2CCC3(CC2)N(CNC3=O)C4=CC=CC=C4)C=C1	1	1	0	0	1	0	0	subs/inhib	0
CC(C(O)C1=CC=C(O)C=C1)N2CCC(CC3=CC=CC=C3)CC2	0	1	1	0	1	0	0	subs/inhib	0
CSC1=CC2=C(SC3=C(CC2N4CCN(C)CC4)C=CC=C3)C=C1	0	1	1	0	1	0	0	subs/inhib	0
C[C@](N)(CC1=CC(O)=C(O)C=C1)C(O)=O	0		1	0	0	1	0	NA	subs/inhib
CC1=CC=C(C=C1)C(=C/CN2CCCC2)\C3=NC=CC=C3	0	1	0	0	1	0	0	subs/inhib	0
COC(=O)[C@@H](N)CCCN\C(N)=N\[N+]([O-])=O	1	0	0	0	0	0	0	0	0
ClC1=CC=CC(SC2CCNCC2)=N1	0		0	0	1	0	0	NA	0
CC1=CC2=C(C=C1)N3CCNC4CCCC2=C34	0	1	0	0	1	0	0	subs/inhib	0
CCN(CC)CCOC1=CC=C(CC2=CC=CC=C2)C=C1	0	1	0	0	1	0	0	subs/inhib	0
CCN(CC)C(=O)C1=CC=C(C=C1)[C@@H](N2C[C@@H](C)N(CC=C)C[C@@H]2C)C3=CC=CC(OC)=C3	1	1	1	0	1	1	0	subs/inhib	subs/inhib
CNCCCCOC1=C(CC2=CC=CC=C2)C=CC=C1	0	1	0	0	1	1	0	subs/inhib	1
CN\C(NCCSCC1=CSC(N=C(N)N)=N1)=N/C#N	0	0	0	0	1	1	0	1	1
CC(C)NCC(O)C1=CC2=C(C=CC=C2)C=C1	0	1	0	0	1	0	0	subs/inhib	0
CC(C)NCC(O)COC1=CC=C(NC(C)=O)C=C1	0	0	0	0	0	0	0	0	0
CC1=C(CCCl)SC=N1	0	0	0	0	0	0	0	0	0
NC(=N)N\N=C\C1=C(Cl)C=CC=C1Cl	0	0	0	0	1	0	0	1	0
CC(C)NCC(O)COC1=CC=C(COCCOC(C)C)C=C1	0	0	0	0	0	0	0	0	0
CCN1CCC[C@H]1CNC(=O)C2=C(OC)C(Br)=CC=C2OC	0	1	0	0	0	0	0	0	0
CCCOC1=C(C=CC=C1)C2=NC3=NNN=C3C(=O)N2	0	0	0	0	0	0	0	0	0
CC\C(C1=CC=CC=C1)=C(/C2=CC=CC=C2)C3=CC=C(OCCN(C)C)C=C3	0	0	1	0	0	0	0	0	0
C[C@H](CC1=CC=CC=C1)N(C)CC#C	1	1	0	0	0	0	0	0	0
CC(=O)O[C@H]1[C@@H](O)[C@H]2C(C)(C)CC[C@H](O)[C@]2(C)[C@@]3(O)C(=O)C[C@@](C)(O[C@]13C)C=C	0			0	0	0	0	NA	NA
CC(=O)N1CCN(CC1)C2=CC=C(OC[C@H]3CO[C@@](CN4C=CN=C4)(O3)C5=CC=C(Cl)C=C5Cl)C=C2	0	0	1	1	0	1	1	0	subs/inhib
CCN(CC)CC1CCCCN1CC(=O)N2C3=C(C=CC=C3)C(=O)NC4=C2N=CC=C4	0	0	0	0	0	0	0	0	0
COC1=C(C=CC=C1)N2CCN(CCCCNC(=O)C3=CC=C(C=C3)C4=CC=C(C=C4)C(C)=O)CC2	0	1	1	0	1	0	0	subs/inhib	0
COC(=O)C1=C(C)NC(C)=C(C1C2=CC=CC(=C2)[N+]([O-])=O)C(=O)OCCCN3CCC(CC3)(C4=CC=CC=C4)C5=CC=CC=C5	0	0	1	1	1	1	1	1	subs/inhib
COC(=O)[C@H]1[C@@H](O)CC[C@H]2CN3CCC4=C(NC5=C4C=CC=C5)[C@@H]3C[C@H]12	0	1	0	0	1	0	0	subs/inhib	0
CN(CC1=CN=C2N=C(N)N=C(N)C2=N1)C3=CC=C(C=C3)C(=O)N[C@@H](CCC(O)=O)C(O)=O	0	0	0	0	0	0	0	0	0
Cl\C(=C/N1C=NC=N1)C2=C(Cl)C=C(Cl)C=C2	0	1	0	0	1	0	0	subs/inhib	0
CC3(COC1=CC=C(CC2SC(=O)NC2=O)C=C1)CCCCC3	0	0		0	0	0	0	0	NA
CN(C)C1=CC=CC(=C1)C(=O)NC2=CC(NC(=O)C3=CC=C(O)C=C3)=C(C)C=C2	1	0	0	1	0	1	subs/inhib	0	1
CC[N+](CC)(CC)CCOC1=CC=C(\C=C\C2=CC=CC=C2)C=C1		0		0	1	0	NA	1	NA
COC1=C(OC)C(OC)=C2C(CC[C@H](NC(C)=O)C3=CC(=O)C(OC)=CC=C23)=C1	0	0	0	0	0	0	0	0	0
CC1(C)OC2=C(C=C(C=C2)C#N)[C@H]([C@@H]1O)N3CCCC3=O	0	0	0	0	0	0	0	0	0
C[C@@H](C1=C(CCN(C)C)CC2=C1C=CC=C2)C3=NC=CC=C3	0	1	0	0	0	0	0	0	0
CN(C(=O)C1=C(O)C2=C(C=CC=C2)N(C)C1=O)C3=CC=CC=C3	0	0	0	0	0	0	0	0	0
CCOC(=O)C1=CN=CN1C(C)C2=CC=CC=C2	0	0	0	0	0	1	0	0	1
CC#C[C@]1(O)CC[C@H]2[C@@H]3CCC4=CC(=O)CCC4=C3[C@H](C[C@]12C)C5=CC=C(C=C5)N(C)C	1	1	1	1	1	1	subs/inhib	subs/inhib	subs/inhib
C[C@H]1CN(CCCN2C3=C(C=CC=C3)C4=C2C=CC=C4)C[C@@H](C)N1	0	1	0	0	1	1	0	subs/inhib	1
OC(=O)\C=C\C1=CC=C(CN2C=CN=C2)C=C1	0	0	0	0	0	0	0	0	0
CC(C)OC(=O)C1=CC2=C(N1)C=CC=C2OCC(O)CNC(C)(C)C	0	1	0	0	0	0	0	0	0
C[C@]12[C@@H]3CC[C@@H](O3)[C@@]1(C)C(=O)OC2=O	0	0	0				NA	NA	NA
OC1=CC2=C(NC=C2CCCCN3CCC(=CC3)C4=CC=CC=C4)C=C1	0	1	0	0	1	0	0	subs/inhib	0
CN[C@@H]1C[C@H](C2=CC=CC=C12)C3=CC(Cl)=C(Cl)C=C3	0	1	0	0	1	1	0	subs/inhib	1
CC(CC1=CC=CC=C1)(NC(=O)CN)C2=CC=CC=C2	0	0	0	0	0	1	0	0	1
COC1CN(CCCOC2=CC=C(F)C=C2)CCC1NC(=O)C3=CC(Cl)=C(N)C=C3OC	0	0	1	0	1	1	0	1	subs/inhib
CC1(OC(=CC1=O)C(O)=O)C2=CC=CC=C2	0	0	0	0	0	0	0	0	0
CN(C)C\C=C(\C1=CC=C(Br)C=C1)C2=CN=CC=C2	0	1	0	0	1	0	0	subs/inhib	0
COC1=CC(N)=C(Cl)C=C1C(=O)NC2CN3CCC2CC3	0	0	0	0	0	0	0	0	0
CCOC(=O)C1=CC=C(OC(=O)CCCCCNC(N)=N)C=C1	0	1	1	0	1	0	0	subs/inhib	0
FC1=CC=C(C=C1)C(=O)C2CCN(CCN3C(=S)NC4=CC=CC=C4C3=O)CC2	0	1	1	0	1	0	0	subs/inhib	0
CCN1CCC[C@H]1CNC(=O)C2=C(OC)C(Cl)=CC(Cl)=C2O	0	1	0	0	0	0	0	0	0
O=C1N(CCCCN2CCN(CC2)C3=NC=CC=N3)S(=O)(=O)C4=C1C=CC=C4	0	1	1	0	1	0	0	subs/inhib	0
COC(=O)C1=C(C)NC(C)=C(C1C2=CC=CC3=NON=C23)C(=O)OC(C)C	0	0	1	1	0	1	1	0	subs/inhib
CNCC[C@@H](OC1=C(C)C=CC=C1)C2=CC=CC=C2	0	1	0	0	1	0	0	subs/inhib	0
CN1CCC2=CC=CC3=C2[C@H]1CC4=C3C(O)=C(O)C=C4	1	1	1	0	0	1	0	0	subs/inhib
FC1=CC=C(C=C1)[C@@H]2CCNC[C@H]2COC3=CC=C4OCOC4=C3	1	1	0	1	1	1	subs/inhib	subs/inhib	1
[O-][N+](=O)OCCNC(=O)C1=CN=CC=C1		0		0	0	0	NA	0	NA
ClC1=CC=C(C=C1)C(=O)NCCN2CCOCC2	0	1	0	0	1	0	0	subs/inhib	0
COC1=CC(=CC(OC)=C1OC)C(=O)NCCCCCC(O)=O	0	0	0	0	0	0	0	0	0
CC(=O)NC(CC1=CC=CC=C1)C(O)=O	0		0	0	0	0	0	NA	0
O=C(NCCC1=CNC2=C1C=CC=C2)C3=CN=CC=C3	0	1	0	0	0	1	0	0	1
N1C=NC(=C1C2=CC=CC=C2)C3=CC=CC=C3	0	0	1	0	1	1	0	1	subs/inhib
CCN(CC)CC(=O)NC1=C(C)C=C(C)C=C1C	0	1	1	0	0	0	0	0	0
CC1=CC=NC2=C1NC(=O)C3=CC=CN=C3N2C4CC4	0	0	0	0	0	0	0	0	0
NC(=O)N1C2=C(CC(=O)C3=C1C=CC=C3)C=CC=C2	0	0	0	0	0	0	0	0	0
COC1=C(N2CCNC(C)C2)C(F)=CC3=C1N(C=C(C(O)=O)C3=O)C4CC4	0	0	0	0	0	0	0	0	0
COC1=CC=C2N3CCN(C)C4=NCCC(C2=C1)=C34	0	1	0	0	0	0	0	0	0
COC(=O)C1=CN=CN1C(C)C2=CC=CC=C2	0	0	0	0	1	1	0	1	1
CN1CCN(CC1)C2=C3SCCN4C=C(C(O)=O)C(=O)C(C=C2F)=C34	1	0	0	0	0	0	0	0	0
COP(=S)(OC)SCN1C(=O)C2=C(C=CC=C2)C1=O	0	0	0	1	0	1	1	0	1
OC[C@@H]1CC[C@@H](O1)N2C=NC3=C2N=CNC3=O	0	0		0	1	0	0	1	NA
COC(=O)C1=C(C=CC=C1)C(=O)OC	0			0	0	0	0	NA	NA
CN1CCC[C@H]1C2=CN=CC=C2	0	0	0				NA	NA	NA
N=C(NC1=CC=CC=C1)NC2=CC=CC=C2	0	1	0	0	1	0	0	subs/inhib	0
NC(=O)C1=NN(C=N1)[C@@H]2O[C@H](CO)[C@@H](O)[C@H]2O	0	0		0	0	0	0	0	NA
CC1=CC(=O)[N-]S(=O)(=O)O1	0			0	0	0	0	NA	NA
CC1(C)C2CCC1(C)C(=O)C2	1	1	0				NA	NA	NA
OCCOC1=CC=CC=C1	0		1	0	0	0	0	NA	0
CC\C(C1=CC=C(O)C=C1)=C(\CC)C2=CC=C(O)C=C2	0	0	0				NA	NA	NA
CC(\C=C\C1=C(C)CCCC1(C)C)=C/C=C/C(C)=C/C(=O)NC2=CC=C(O)C=C2	0	0	0				NA	NA	NA
CC[C@H]1OC(=O)[C@H](C)[C@@H](O[C@H]2C[C@@](C)(OC)[C@@H](O)[C@H](C)O2)[C@H](C)[C@@H](O[C@@H]3O[C@H](C)C[C@@H]([C@H]3O)N(C)C)[C@](C)(O)C[C@@H](C)CN(C)[C@H](C)[C@@H](O)[C@]1(C)O	0	0	1	0	0	0	0	0	0
N[C@@H](CC1=CC=C(C=C1)N(CCCl)CCCl)C(O)=O	0	0	1	0	0	1	0	0	subs/inhib
CCCCC(CC)COC(=O)C1=CC=C(C=C1)N(C)C	1	1		0	0	0	0	0	NA
C[C@]12CC(=O)[C@H]3[C@@H](CCC4=CC(=O)C=C[C@]34C)[C@@H]1CC[C@]2(O)C(=O)CO	0	0	0	0	0	0	0	0	0
OC[C@H]1O[C@H](C[C@@H]1O)N2C=C(Br)C(=O)NC2=O	0		1	0	0	0	0	NA	0
CC(=O)OC1=C(C=CC=C1)C(=O)NC2=NC=C(S2)[N+]([O-])=O	1		1	1	1	1	subs/inhib	NA	subs/inhib
CC1=C(O)C=CC=C1C(=O)N[C@@H](CSC2=CC=CC=C2)[C@H](O)CN3C[C@H]4CCCC[C@H]4C[C@H]3C(=O)NC(C)(C)C	1	1	1	0	1	1	0	subs/inhib	subs/inhib
O=C(C1=CC=CC=C1)C2=CC=CC=C2	1	1	0	0	0	0	0	0	0
C1=CC2=CC=CC=C2C=C1	0	0	1	0	0	0	0	0	0
C[C@H]1O[C@H](C[C@H](O)[C@@H]1O)O[C@H]2[C@@H](O)C[C@H](O[C@H]3[C@@H](O)C[C@H](O[C@H]4CC[C@@]5(C)[C@H](CC[C@@H]6[C@@H]5C[C@@H](O)[C@]7(C)[C@H](CC[C@]67O)C8=CC(=O)OC8)C4)O[C@@H]3C)O[C@@H]2C	0		1	0	0	0	0	NA	0
OC1=CC=C(Cl)C=C1	0	1		0	0	0	0	0	NA
NC1=CC=C(O)C=C1	0	0	0	0	1	1	0	1	1
CC(=O)NC1=CC=C(C=C1)C(O)=O	0		0	0	0	0	0	NA	0
COC1=C(O)C=CC=C1	0			0	0	0	0	NA	NA
OC1=C(C=CC=C1)C(=O)OC2=CC=CC=C2			0	0	0	0	NA	NA	0
OC(=O)C1=CC(=CC=C1O)\N=N\C2=CC=C(C=C2)S(=O)(=O)NC3=NC=CC=C3	0	0	0	0	0	0	0	0	0
CS(=O)(=O)OCCCCOS(C)(=O)=O		0	0	0	0	0	NA	0	0
C1CCC(CC1)NC2CCCCC2	0	0	0	0	1	0	0	1	0
CCCCCCCC(O)=O	0		0	0	0	0	0	NA	0
CCCOC(=O)C1=CC=C(O)C=C1		0	0	0	0	0	NA	0	0
CCOC(=O)C1=CC=CC=C1C(=O)OCC			0	0	0	0	NA	NA	0
OC(=O)CC1=C2C=CC=CC2=CC=C1		0		0	0	0	NA	0	NA
COP(=O)(OC)OC=C(Cl)Cl	0	0	0	0	0	0	0	0	0
C[C@]1(O)CC[C@H]2[C@@H]3CCC4=CC(=O)CC[C@]4(C)[C@H]3CC[C@]12C	0	0	1	0	0	0	0	0	0
CCCCCCCCCCCC[N+](C)(C)CCOC1=CC=CC=C1	1			0	1	0	0	NA	NA
OC[C@@H](NC(=O)C(Cl)Cl)[C@H](O)C1=CC=C(C=C1)[N+]([O-])=O	0		0	0	0	0	0	NA	0
C[C@H]1C[C@H]2[C@@H]3CCC4=CC(=O)C=C[C@]4(C)[C@@]3(F)[C@@H](O)C[C@]2(C)[C@@]1(O)C(=O)CO	0	0	0	0	0	0	0	0	0
CCCCCCCCCCCCCCCC[N+]1=CC=CC=C1	0			0	1	0	0	NA	NA
NC1=CC=C(C=C1)C(O)=O	0	0	0	0	0	0	0	0	0
C=CC1=CC=CC=C1	0	0	0	0	0	0	0	0	0
COC1=C(O)C=CC(=C1)[C@H]2OC3=C(O[C@@H]2CO)C=CC(=C3)[C@H]4OC5=CC(O)=CC(O)=C5C(=O)[C@@H]4O	0	0	0	1	0	1	1	0	1
CC\C=C/C\C=C/C\C=C/CCCCCCCC(O)=O		1	0	0	0	0	NA	0	0
N[C@@H](CC1=CNC2=CC=C(O)C=C12)C(O)=O	0	0	0	0	0	0	0	0	0
CC(C)NC(C)C			0	0	0	0	NA	NA	0
CCOP(=S)(OCC)OC1=CC(C)=NC(=N1)C(C)C	1	1	1	1	0	1	subs/inhib	0	subs/inhib
COC(=O)C1=C(O)C=CC=C1	0	0	0	0	0	0	0	0	0
CN(C)C1=CC=C(C=C1)C(C2=CC=C(C=C2)N(C)C)=C3C=CC(C=C3)=[N+](C)C	0	0	1	1	1	0	1	1	0
COC1=CC(OC)=C2C(=O)[C@]3(OC2=C1Cl)[C@H](C)CC(=O)C=C3OC	0	0	1	0	0	0	0	0	0
OC(=O)C1=CC(O)=C(O)C(O)=C1	1			0	0	1	0	NA	NA
OC(=O)COC1=CC=CC=C1	0	0		0	0	0	0	0	NA
NC1=NC=CS1	0	0		0	0	0	0	0	NA
NC1=C(C=CC=C1)C(O)=O	1	0	0	0	0	0	0	0	0
OC1=C(Br)C=C(Br)C=C1Br	0	0	0	0	0	0	0	0	0
CCCCCCC1=C(O)C=C(O)C=C1	0	1	0	1	1	1	1	subs/inhib	1
CCN(CC)C(=O)C1=CC=CC(C)=C1	0	0	1	0	0	0	0	0	0
COC1=CC2=C(C=CN=C2C=C1)[C@H](O)[C@H]3C[C@@H]4CCN3C[C@@H]4C=C			0				NA	NA	NA
COC1=CC=C2N=CC=C([C@H](O)[C@H]3CC4CCN3C[C@@H]4C=C)C2=C1	0	0	0	0	1	0	0	1	0
CO[C@H]1[C@@H](C[C@@H]2CN3CCC4=C(NC5=C4C=CC(OC)=C5)[C@H]3C[C@@H]2[C@@H]1C(=O)OC)OC(=O)C6=CC(OC)=C(OC)C(OC)=C6	0	1	1	0	0	1	0	0	subs/inhib
CN(C)[C@H]1[C@@H]2[C@@H](O)[C@H]3C(C(=O)C4=C(C=CC=C4O)[C@@]3(C)O)=C(O)[C@]2(O)C(=O)C(C(N)=O)=C1O	0	0	0	0	0	0	0	0	0
CCCCCC(N)=O	0		0	0	0	0	0	NA	0
OC1=CC=C(Cl)C=C1CC2=CC(Cl)=CC=C2O	1	0	0	1	0	0	subs/inhib	0	0
CC(=O)NC1=CC=CC=C1	0	0	0	0	0	0	0	0	0
CC1=C(Cl)C=CC(O)=C1	0	1		0	0	0	0	0	NA
OC(=O)CCCCC(O)=O	0	0	0	0	0	1	0	0	1
OC1=CC=CC2=C1C(=O)C3=C(O)C=CC=C3C2=O	0		0	0	0	1	0	NA	1
CC[N+]1=C2C=C(N)C=CC2=C3C=CC(N)=CC3=C1C4=CC=CC=C4	0			0	1	1	0	NA	NA
COC1=CC=C(O)C=C1	0	0	0	0	0	0	0	0	0
OC(C(=O)C1=CC=CC=C1)C2=CC=CC=C2	0			0	0	0	0	NA	NA
NC(=S)NCC=C	0		0	0	0	0	0	NA	0
NC(=O)C1=CC=CC=C1O	0	0	0	0	0	0	0	0	0
CC(=O)NC1=CC=CC(O)=C1	0		0	0	0	0	0	NA	0
CN\C(NCCSCC1=C(C)N=CN1)=N/C#N	0	0	0	0	0	0	0	0	0
COC1=C(O)C=CC(CC=C)=C1		0		0	0	0	NA	0	NA
CC1=CC=C(C=C1)C2=CC(=NN2C3=CC=C(C=C3)S(N)(=O)=O)C(F)(F)F	1	1	0	0	0	0	0	0	0
CC(C)(C)NC(=O)[C@@H]1C[C@@H]2CCCC[C@@H]2CN1C[C@@H](O)[C@H](CC3=CC=CC=C3)NC(=O)[C@H](CC(N)=O)NC(=O)C4=NC5=C(C=CC=C5)C=C4	1	0	1				NA	NA	NA
COC1=CC(\C=C\C)=CC=C1O	0	0	0				NA	NA	NA
COC1=CC=C(\C=C\C)C=C1	0		0				NA	NA	NA
OC1=CC(O)=CC=C1	0	0	0	0	0	0	0	0	0
O=C1OC2=C(C=CC=C2)C=C1	0	0	0	0	0	0	0	0	0
[O-][N+](=O)C1=CC=C(O1)\C=N\N2CC(=O)NC2=O	0	1	0	0	0	1	0	0	1
OC1=CC=CC(O)=C1O	0	0	0	0	0	1	0	0	1
OC[C@H](O)[C@H]1OC(=O)C(O)=C1O			0	0	0	0	NA	NA	0
C[C@]12CC[C@H]3[C@@H](CCC4=C3C=CC(O)=C4)[C@@H]1CC[C@@H]2O		0		0	0	0	NA	0	NA
CCOC1=C(O)C=CC(C=O)=C1	1	0	0	0	0	0	0	0	0
OC1=C(C=CC=C1)C2=CC=CC=C2		1					NA	NA	NA
CCCCCCCCCCCCCCCCCC(O)=O	0		1	0	0	0	0	NA	0
CCOC1=C(C=CC=C1)C(N)=O	0	0	0	0	0	0	0	0	0
COP(=S)(OC)OC1=CC(C)=C(SC)C=C1	1	1		1	0	1	subs/inhib	0	NA
COC1=C(O)C=CC(C=O)=C1	0	0	0	0	0	0	0	0	0
CC12CCC(CC1)C(C)(C)O2	0	1	0	0	0	0	0	0	0
C\C=C\C=C\C(O)=O	0	0	0	0	0	0	0	0	0
CC1=CC(=C(O)C(=C1)C(C)(C)C)C(C)(C)C	0	0	0	0	0	0	0	0	0
CC1=CC(O)=C2C(=O)C3=C(O)C=CC=C3C(=O)C2=C1	1		1	0	0	0	0	NA	0
CN(C)\N=N\C1=C(N=CN1)C(N)=O	0	0	0	0	0	0	0	0	0
OC(=O)C1=CC=CC=C1	1		1				NA	NA	NA
CC1CC(CC(C)(C)C1)OC(=O)C2=CC=CC=C2O			0	0	0	0	NA	NA	0
CC1=CC=C2N=C3N(CC[C@@]3(O)C(=O)C2=C1)C4=CC=CC=C4	1	1	0				NA	NA	NA
N\C(SC1=CC=C(N)C=C1)=C(\C#N)C2=CC=CC=C2C(F)(F)F	1	0	1	1	0	1	subs/inhib	0	subs/inhib
COP(=O)(OC)OC(C1=CC=C(Cl)C=C1)P(=O)(OC)OC	0	0	0	0	0	0	0	0	0
CCC(CC)(CC(=O)NC1=CC=CC(\C=C\C2=NC(=CS2)C3CCC3)=C1)C(O)=O	1	0	1	0	0	1	0	0	subs/inhib
CCN1CCCC1CNC(=O)C2=C(OC)C=C(N)C(=C2)S(=O)(=O)CC	0	0	0	0	0	0	0	0	0
CN1N=C(N)C2=CN([C@@H]3O[C@H](CO)[C@@H](O)[C@H]3O)C4=C2C1=NC=N4	0	0	0	0	0	0	0	0	0
O[C@@H](CNCCOC1=CC=C(CC(O)=O)C=C1)C2=CC=CC=C2	0	0	0	0	0	0	0	0	0
CCN(CC)CCCC(C)NC1=NC(NC2=CC3=C(N)C=C(C)N=C3C=C2)=CC(C)=N1	0		0	0	0	0	0	NA	0
OC(=O)C1=CC2=C(NC=C2CCCCN3CCC(=CC3)C4=CC=CC=C4)C=C1	0	0	0	0	0	0	0	0	0
OC(CN1CCC(CC2=CC=C(F)C=C2)CC1)C3=CC=C(Cl)C=C3	1	1	1	0	1	0	0	subs/inhib	0
COC1=CC2=C(CC(=O)N(CCCN(C)CCC3=CC(OC)=C(OC)C=C3)CC2)C=C1OC		0		0	0	0	NA	0	NA
CC(C)CC(N(C)C)C1(CCC1)C2=CC=C(Cl)C=C2	1	1	1	0	1	1	0	subs/inhib	subs/inhib
CCCCC[C@H](O)\C=C\[C@H]1[C@H](O)CC(=O)[C@@H]1C\C=C/CCCC(O)=O			0	0	0	0	NA	NA	0
CN1CCC2=CC(Cl)=C(O)C=C2[C@@H]3[C@@H]1CCC4=C3C=CC=C4	0	0	0	0	1	0	0	1	0
COC1=CC=C(C=C1OC)S(=O)(=O)N2[C@H](C(=O)N3CCC[C@@H]3C(N)=O)[C@@](O)(C4=C2C=CC(Cl)=C4)C5=C(Cl)C=CC=C5	0	0	1	0	0	1	0	0	subs/inhib
COC1=CC2=C(C=C1OC)C3=C\C(=N/C4=C(C)C=C(C)C=C4C)N(C)C(=O)N3CC2	1	1	1	1	0	0	subs/inhib	0	0
CC1=NN=C2CN=C(C3=C(SC(CCC(=O)N4CCOCC4)=C3)N12)C5=C(Cl)C=CC=C5	0	0	1	0	0	0	0	0	0
CN1CC(=O)N=C1NC(=O)NC2=CC(Cl)=CC=C2	0	0	1	0	0	0	0	0	0
COC1=CC=C(C=C1)C2=C(C(=O)C3=CC=C(C=C3)C#N)C4=CC=C(OC)C=C4O2	1	1	0	1	1	1	subs/inhib	subs/inhib	1
CN[C@H]1CC[C@@H](C2=CC(Cl)=C(Cl)C=C2)C3=C1C=CC=C3	0	1	1	0	1	1	0	subs/inhib	subs/inhib
C[C@H]1[C@H]2CC[C@H]3[C@@H]4CC=C5C[C@H](CC[C@]5(C)[C@H]4CC[C@]23CN1C)N(C)C	0	1	0	0	0	0	0	0	0
COC1=CC=C2[C@H]3CC[C@@]4(C)[C@@H](CC[C@@]4(O)C#C)[C@@H]3CCC2=C1		0	1	1	0	1	NA	0	subs/inhib
NC(=O)C1=CN=CC=C1	0		0	0	0	0	0	NA	0
NC1=NC(=O)N(C=C1)[C@@H]2O[C@H](CO)[C@@H](O)[C@@H]2O		0	0	0	0	0	NA	0	0
CNCCC1=CC=CC=N1	0	0	0	0	0	0	0	0	0
CC1=CC(=O)NC(=S)N1	0		0	0	0	0	0	NA	0
NC1=CC=C(C=C1)[As](O)(O)=O	0	0	0	0	0	0	0	0	0
CC(C)(C)NC(=O)[C@H]1CC[C@H]2[C@@H]3CC[C@H]4NC(=O)C=C[C@]4(C)[C@H]3CC[C@]12C	0	0	0	1	0	0	1	0	0
CN1[C@@H](CCC1=O)C2=CN=CC=C2		0	0	0	0	0	NA	0	0
CC1=CC(N)=C2C=CC=CC2=[N+]1CCCCCCCCCC[N+]3=C(C)C=C(N)C4=CC=CC=C34	0	0		0	1	1	0	1	NA
CNC(=O)OC1=CC=C2N(C)[C@H]3N(C)CC[C@@]3(C)C2=C1	0	0	0	0	1	0	0	1	0
N[C@@H](CCC(N)=O)C(O)=O			0				NA	NA	NA
CC(=O)[C@@]1(O)CC[C@H]2[C@@H]3CCC4=CC(=O)CC[C@]4(C)[C@H]3CC[C@]12C	0	0	0	0	0	0	0	0	0
CC1NC2=CC(Cl)=C(C=C2C(=O)N1C3=C(C)C=CC=C3)S(N)(=O)=O	0	0	1	0	0	0	0	0	0
O\N=C1C2=CC=CC=C2NC/1=C3\C(=O)NC4=CC(Br)=CC=C34	1	0	1	0	0	0	0	0	0
CC1=CC(C)=C(N1)\C=C2/C(=O)NC3=CC=CC=C23	1	0					NA	NA	NA
CC1=CC=C(C=C1)[S+]([O-])(=O)N[C@@H](CC2=CC=CC=C2)C(=O)CCl	1	1	1	1	0	1	subs/inhib	0	subs/inhib
N[C@@H](CC1=CNC2=C1C=CC=C2)C(O)=O		1	0				NA	NA	NA
CCOP(=S)(OCC)OC1=CC=C2C(C)=C(Cl)C(=O)OC2=C1	1	1	1	1	0	0	subs/inhib	0	0
CCNC1=NC(NCC)=NC(Cl)=N1	0	0	1	0	0	0	0	0	0
CN(C)C(=O)NC1=CC(Cl)=C(Cl)C=C1	0	0	0	0	0	0	0	0	0
NC(=O)C1=C(Cl)C=C(C=C1)[N+]([O-])=O	0	0	0	0	0	0	0	0	0
CC(C)=CC1C(C(=O)OCC2=CC(OC3=CC=CC=C3)=CC=C2)C1(C)C	1		1	1	0	1	subs/inhib	NA	subs/inhib
CC(C)C1=CC=CC(=O)C(O)=C1	0	0	0	0	0	0	0	0	0
CCN(C(=O)C=CC)C1=C(C)C=CC=C1	0	0	0	0	0	0	0	0	0
NC1=C(C(=NN1C2=C(Cl)C=C(C=C2Cl)C(F)(F)F)C#N)S(=O)C(F)(F)F		0	1	1	1	0	NA	1	0
O=C1NC=NC2=C1C=NN2	0	0	0	0	0	0	0	0	0
CC1=CC(O)=CC(C)=C1Cl	1			0	0	0	0	NA	NA
NS(=O)(=O)C1=C(Cl)C=CC(=C1)C2(O)NC(=O)C3=C2C=CC=C3	0	0	0	0	0	0	0	0	0
ClC1=CC=C(NC(=N)NC(=N)NCCCCCCNC(=N)NC(=N)NC2=CC=C(Cl)C=C2)C=C1	0	0	0	0	1	0	0	1	0
S1C2=C(C=CC=C2)C3=C1C=CC=C3	1			0	0	0	0	NA	NA
COC1=C(OCC(O)CO)C=CC=C1	0		0	0	0	0	0	NA	0
S=C1NC=NC2=C1N=CN2	0	0	0	0	0	0	0	0	0
C1N2CN3CN1CN(C2)C3	0	0	1	0	0	0	0	0	0
CN1C=CNC1=S		0	0	0	0	0	NA	0	0
NC(=O)NC(=O)CC1=CC=CC=C1	0	0	0	0	0	0	0	0	0
OCC1=CC=CC=C1O	0	0	0	0	0	0	0	0	0
CN1C(CC([O-])=O)=CC(C)=C1C(=O)C2=CC=C(Cl)C=C2	0	1	0	0	0	0	0	0	0
OC1=C2N=CC=CC2=C(Br)C=C1Br	0	0	1	0	0	0	0	0	0
CCC(=O)C1=C(O)C=C(O)C=C1O	1	0	0	0	0	1	0	0	1
CCC(C(CC)C1=CC=C(O)C=C1)C2=CC=C(O)C=C2	1	0					NA	NA	NA
CCCCC(CC)CN1CN(CC(CC)CCCC)CC(C)(N)C1	0	1	1	0	1	0	0	subs/inhib	0
CC(=O)NC(CCC(O)=O)C(O)=O			0				NA	NA	NA
N[C@@H](CC1=CC(I)=C(OC2=CC(I)=C(O)C(I)=C2)C(I)=C1)C(O)=O	0	0	0	0	0	0	0	0	0
NS(=O)(=O)C1=C(Cl)C=C2NC(CSCC=C)NS(=O)(=O)C2=C1	0	0	0	0	0	0	0	0	0
NC1=NC=NC2=C1N=CN2	0	0	0	0	0	0	0	0	0
NC1=C2C=CC=CC2=NC3=C1C=CC=C3	1	0	0	0	0	0	0	0	0
CC1=NCCC2=C1NC3=C2C=CC(O)=C3	0	0	0	0	0	0	0	0	0
O=C(\C=C\C=C\C1=CC=C2OCOC2=C1)N3CCCCC3	1	0	0	0	0	0	0	0	0
OC[C@H]1O[C@@H](OC2=C(O)C=C3OC(=O)C=CC3=C2)[C@H](O)[C@@H](O)[C@@H]1O	0	0	0	0	0	0	0	0	0
OCC(O)COC(=O)C1=C(NC2=C3C=CC(Cl)=CC3=NC=C2)C=CC=C1	0	0	1	1	1	1	1	1	subs/inhib
CN1CCOC(C2=CC=CC=C2)C3=C(C1)C=CC=C3	0	1	0	0	1	0	0	subs/inhib	0
CC1=C(OCC(O)CO)C=CC=C1	0		0	0	0	1	0	NA	1
ClC1=CC=C(CSC(CN2C=CN=C2)C3=CC=C(Cl)C=C3Cl)C=C1	1	0	1	1	1	1	subs/inhib	1	subs/inhib
CC(C(O)=O)C1=CC=C(C=C1)C(=O)C2=CC=CS2	0	0	0	1	0	0	1	0	0
O=C1NS(=O)(=O)C2=C1C=CC=C2	0	0	0	0	0	0	0	0	0
CC(C(O)=O)C1=CC=C2C(NC3=CC=C(Cl)C=C23)=C1	0		0	0	0	0	0	NA	0
O=C(OCC1=CC=CC=C1)C2=CC=CC=C2	0			0	0	0	0	NA	NA
CC1=C(C=C(C=C1C(N)=O)[N+]([O-])=O)[N+]([O-])=O	0	0	0	0	0	0	0	0	0
OC(=O)C1=CC(=O)C2=C(O1)C=CC=C2	0	0	0	0	0	0	0	0	0
CC(=O)NCCCCCC(O)=O	0	0	0	0	0	0	0	0	0
CCCCC(CC)CNC(=N)NC(=N)NCCCCCCNC(=N)NC(=N)NCC(CC)CCCC	0	0	0	0	1	0	0	1	0
OC1=CC2=C(SC(=O)O2)C=C1		1		0	0	0	NA	0	NA
CC(=O)OC1=CC=C(Cl)C2=C1N=CC=C2	0			0	0	0	0	NA	NA
CC(=O)NC1=CC=C(C=C1)[S+]([O-])(=O)NC2=CC=C(C=C2)[N+]([O-])=O	0	0	0				NA	NA	NA
BrCCC(=O)N1CCN(CC1)C(=O)CCBr		0	0	0	1	0	NA	1	0
CCCCCCOC1=C(C=CC=C1)C(N)=O	1	0	0	1	0	0	subs/inhib	0	0
CC(=O)OC1=CC=CC(O)=C1	0	0		0	0	0	0	0	NA
CCC(CC1=C(I)C=C(I)C(N)=C1I)C(O)=O	1	0	0	0	0	0	0	0	0
OC1=NC(S)=NC=C1			0	0	0	0	NA	NA	0
OC(CN1C=NC=N1)(CN2C=NC=N2)C3=C(F)C=C(F)C=C3	0	0	0	0	0	0	0	0	0
CCCC1=NN(C)C2=C1N=C(NC2=O)C3=CC(=CC=C3OCC)S(=O)(=O)N4CCN(C)CC4		0	1	0	0	1	NA	0	subs/inhib
CC1=CC=C(C=C1)S(=O)(=O)NC(=O)NN2CC3CCCC3C2	0	0	0	0	0	1	0	0	1
COC1=CC=C(C=C1)C(CN(C)C)C2(O)CCCCC2	0	1	0	0	0	0	0	0	0
COC1=CC=C(C=C1)C(=O)CC(=O)C2=CC=C(C=C2)C(C)(C)C	0	0	0	0	0	0	0	0	0
CC1=CC(OCC2CNC(=O)O2)=CC(C)=C1	0	0	0	0	0	0	0	0	0
CC(C)[C@H]1CC[C@@H](CC1)C(=O)N[C@H](CC2=CC=CC=C2)C(O)=O	1	0	0	0	0	0	0	0	0
CCCCC1=NC2(CCCC2)C(=O)N1CC3=CC=C(C=C3)C4=CC=CC=C4C5=NN=NN5		0	0	0	0	1	NA	0	1
CCOC1=NC2=CC=CC(C(=O)OC(C)OC(=O)OC3CCCCC3)=C2N1CC4=CC=C(C=C4)C5=CC=CC=C5C6=NN=NN6	1	1	1	1	0	1	subs/inhib	0	subs/inhib
CN(CCOC1=CC=C(CC2SC(=O)NC2=O)C=C1)C3=NC=CC=C3	1	0	0	0	0	0	0	0	0
CCCCC1=NC(Cl)=C(CO)N1CC2=CC=C(C=C2)C3=C(C=CC=C3)C4=NNN=N4	1	0	0	1	0	0	subs/inhib	0	0
CC1=C(C(=NO1)C2=CC=CC=C2)C3=CC=C(C=C3)S(N)(=O)=O	0	1	1	0	0	0	0	0	0
CC(=O)OCC(CCN1C=NC2=C1N=C(N)N=C2)COC(C)=O	0	0	0	0	0	0	0	0	0
CN(C)CCC1=CNC2=C1C=C(CS(=O)(=O)N3CCCC3)C=C2	0	0	0	0	0	0	0	0	0
CCCC1=NC2=C(C=C(C=C2C)C3=NC4=C(C=CC=C4)N3C)N1CC5=CC=C(C=C5)C6=C(C=CC=C6)C(O)=O	1	0	0	1	0	1	subs/inhib	0	1
COC1=CC2=NC(=NC(N)=C2C=C1OC)N(C)CCCNC(=O)C3CCCO3	0	0	0	0	0	0	0	0	0
COC(=O)N\N=C\C1=[N+]([O-])C2=C(C=CC=C2)[N+]([O-])=C1	0	0	0	0	0	0	0	0	0
COC(=O)NC1=NC2=C(N1)C=CC(=C2)S(=O)C3=CC=CC=C3	0	0	0	0	0	0	0	0	0
CC(O)CN1C(C)=NC=C1[N+]([O-])=O	0	0	0	0	0	0	0	0	0
COC(=O)[C@H](CC1=CC=CC=C1)NC(=O)[C@@H](N)CC(O)=O	1	0	1	0	0	0	0	0	0
OC(=O)C(CC1=CC(=O)NC2=C1C=CC=C2)NC(=O)C3=CC=C(Cl)C=C3	0	0	0	0	0	0	0	0	0
CCCC1=NC=CC(=C1)C(N)=S	0	0	0	0	0	0	0	0	0
CCCCCCCCCCCCCCCCOP([O-])(=O)OCC[N+](C)(C)C	0	0	0	0	0	0	0	0	0
NC(=O)CS(=O)C(C1=CC=CC=C1)C2=CC=CC=C2		0		0	0	0	NA	0	NA
CN(C)C(=O)CC1=C(N=C2C=CC(C)=CN12)C3=CC=C(C)C=C3	0	0	0	0	0	0	0	0	0
CCCCCNC(=N)N\N=C\C1=CNC2=C1C=C(OC)C=C2	0	1	0	0	1	0	0	subs/inhib	0
CCN(CC)CCOC1=CC2=C(C=C1)C3=C(C=C(OCCN(CC)CC)C=C3)C2=O	0	0	0	0	0	0	0	0	0
CC(C)=CCOC1=C2OC(=O)C=CC2=CC3=C1OC=C3	1	0		1	1	0	subs/inhib	1	NA
CC1=C(O)C(=O)C=C2C1=CC=C3[C@]2(C)CC[C@@]4(C)[C@@H]5C[C@@](C)(CC[C@@]5(C)CC[C@@]34C)C(O)=O	0	0	1				NA	NA	NA
OC1=CC=C2C(=O)C3=C(C=CC=C3)C(=O)C2=C1O	0	0	1	0	0	0	0	0	0
COC1=CC(OC)=CC(OC)=C1	1	0	0	0	0	0	0	0	0
CC(C)CCCC(C)CCCC(C)CCCC1(C)CCC2=C(C)C(OC(C)=O)=C(C)C(C)=C2O1		0					NA	NA	NA
OC1=C2N=CC=CC2=C(Cl)C=C1Cl	0	1	0	0	0	0	0	0	0
OC1=CC=C2C(=O)C3=C(C(O)=CC=C3O)C(=O)C2=C1O	0		1	0	0	0	0	NA	0
OC1=C2N=CC=CC2=C(Cl)C=C1	1	1	1	0	0	0	0	0	0
[O-][N+](=O)C1=CC=C(O1)\C=N\N2CCOC2=O	0	1	1	0	0	1	0	0	subs/inhib
COC1=C(F)C=C(C=C1)C2=CC(=NN2C3=CC=C(C=C3)S(N)(=O)=O)C(F)F	0	1	0	1	1	0	1	subs/inhib	0
CCCCCC\C=C/CCCCCCCC1=CC=CC(O)=C1C(O)=O		0		1	0	0	NA	0	NA
OC1=CC(O)=C2C(=O)C3=C(C=CC=C3)C(=O)C2=C1O	1		0	0	0	0	0	NA	0
C[C@@]1(CO)[C@H](O)CC[C@@]2(C)[C@H](C\C=C3/[C@H](O)COC3=O)C(=C)CC[C@H]12		0	0	0	0	0	NA	0	0
CC(C)[C@@H]1CC[C@@H](C)CC1=O		0	0	0	0	0	NA	0	0
O=C1NC=NC2=C1NC=N2	1	1	0	0	0	0	0	0	0
CC1=COC2=C1C(=O)C(=O)C3=C2C=CC4=C3CCCC4(C)C	1	1	1	1	0	1	subs/inhib	0	subs/inhib
CN1CC(=O)NC1=N	0	0	0	0	0	0	0	0	0
CC1=CC=CC(C(O)=O)=C1O	0	0	0	0	0	0	0	0	0
CNS(=O)(=O)Cc1ccc2ncc(CCN(C)C)c2c1	0	0	0	0	0	0	0	0	0
OCCOCCN1CCN(CC1)C2=NC3=C(SC4=C2C=CC=C4)C=CC=C3	0	1	1	0	0	0	0	0	0
NC1=CC(O)=C(C=C1)C(=O)OC2=CC=CC=C2	1	1	1	0	0	0	0	0	0
FC(C(F)(F)F)C(F)(F)OC1=C(Cl)C=C(NC(=O)NC(=O)C2=C(F)C=CC=C2F)C(Cl)=C1	0		0	0	0	0	0	NA	0
CCOC1=CC2=C(C=C1)N=C3C=C(N)C=CC3=C2N	0	0	0	0	0	1	0	0	1
CN1CCN(CC1)C2=NC3=C(NC4=C2C=C(C)S4)C=CC=C3			0	0	0	0	NA	NA	0
OC[C@H]1O[C@H]([C@H](O)[C@@H]1O)N2C=NC3=C(O)N=CN=C23	0	0		0	0	0	0	0	NA
OC[C@H]1O[C@H]([C@H](O)[C@@H]1O)N2C=NC3=C2N=CN=C3S	0	0	0	0	0	0	0	0	0
CCCCC1CCC(CCCC(C)CCC(O)=O)CC1	0	0	0	0	0	0	0	0	0
COC1=CC=C(OCC(=O)NC2=C(C)C=CC(=C2)C3=NC4=C(S3)C=CC=C4)C=C1	1	1	1	1	0	1	subs/inhib	0	subs/inhib
COC1=CC=C(OC)C(\C=C(/C#N)C2=NC3=CC=CC=C3C(=O)N2)=C1	1	1	0	1	0	1	subs/inhib	0	1
FC(F)(F)C(=O)NC1=C(C(=O)NC2=CC(Cl)=CC=C2)C3=C(CCCC3)S1		0		1	1	1	NA	1	NA
ClC1=C(\C=C(\C#N)C2=NC3=CC=CC=C3C(=O)N2)C=CC=C1	1	0	1	1	0	0	subs/inhib	0	0
OC(=O)C1=C(OC2=C1C=C(OCC3=CC=C(Cl)C(Cl)=C3)C=C2)C4=CC=CC=C4		0		0	0	0	NA	0	NA
CC1=CC=CC=C1C(=O)NC2=C(C(O)=O)C3=C(CC(CC3)C(C)(C)C)S2	0	0	0	0	0	0	0	0	0
CC1=CC=C(C=C1)C(NC2=NC=CC=C2)C3=C(O)C4=NC=CC=C4C=C3	1	1	1	0	0	0	0	0	0
CC1=CC=CC(NC(C2=CC=CC(Cl)=C2)C3=C(O)C4=NC=CC=C4C=C3)=N1	1	1	1	0	0	0	0	0	0
CC1=CC(NC(C2=CC(C)=CC=C2O)C3=C(O)C4=NC=CC=C4C=C3)=NC=C1	1	1	1	0	0	0	0	0	0
CCOC(=O)C1=C(NCCC2=CC=C(OC)C(OC)=C2)C3=CC(OC)=CC=C3N=C1		0	1	1	1	1	NA	1	subs/inhib
CC1=CC(NC(C2=CC=CC(O)=C2)C3=C(O)C4=NC(C)=CC=C4C=C3)=NC=C1	1	1	1	1	0	0	subs/inhib	0	0
CC1=C(C=C(C=C1)C2=C3C=CC=CC3=C(NC4=CC=CC=C4)N=N2)[S+]([O-])(=O)NCC5=NC6=C(N5)C=CC=C6	1	1	1	0	1	1	0	subs/inhib	subs/inhib
COC1=CC=C(NC2=C3C=CC=CC3=C(N=N2)C4=CC(=C(C)C=C4)[S+]([O-])(=O)NCC5=NC6=C(N5)C=CC=C6)C=C1		0	1	1	1	1	NA	1	subs/inhib
CC1=CC=C(NC2=C3C=CC=CC3=C(N=N2)C4=CC(=C(C)C=C4)[S+]([O-])(=O)NCC5=NC6=C(N5)C=CC=C6)C=C1	1	1	1	1	1	1	subs/inhib	subs/inhib	subs/inhib
CC1=C(C=C(C=C1)C2=C3C=CC=CC3=C(NC4=CC=C(Br)C=C4)N=N2)[S+]([O-])(=O)NCC5=NC6=C(N5)C=CC=C6	0	0	1	1	1	1	1	1	subs/inhib
COC1=CC=C(C=C1)C(=O)NC2=NC3=C(C=CC=C3)N2CCOC4=CC=C(Cl)C=C4	1	0	1	0	0	0	0	0	0
COC1=C(OC(=O)C2=C(F)C=CC=C2)C=CC(=C1)C(C3=C(O)NN=C3C)C4=C(O)NN=C4C	1	1	1	0	0	0	0	0	0
COC1=CC=C(C=C1)C(=O)OC2=CC=C(C=C2)C(C3=C(O)NN=C3C)C4=C(O)NN=C4C	1	1	0	0	0	0	0	0	0
COC1=CC=C(C=C1)C(=O)OC2=CC=C(C=C2OC)C(C3=C(O)NN=C3C)C4=C(O)NN=C4C	1	1	1	1	0	0	subs/inhib	0	0
COC1=C(OC(=O)C2=CC=CC(C)=C2)C=CC(=C1)C(C3=C(O)NN=C3C)C4=C(O)NN=C4C	1	1	1	0	0	0	0	0	0
COC1=C(C=CC=C1)C(=O)OC2=CC=C(C=C2)C(C3=C(O)NN=C3C)C4=C(O)NN=C4C	1	1	1	0	0	0	0	0	0
COC1=C(OC(=O)C2=C(OC)C=CC=C2)C=CC(=C1)C(C3=C(O)NN=C3C)C4=C(O)NN=C4C	1	1	1	1	0	0	subs/inhib	0	0
COC1=CC=C(C=C1C)C(NC2=CC=CC=N2)C3=C(O)C4=NC(C)=CC=C4C=C3	1	1		1	0	0	subs/inhib	0	NA
CC1=CC=C(CN2C(CC3=CC=CC=C3)=NC4=CC=CC=C24)C=C1	1	1	1	0	0	1	0	0	subs/inhib
CCOC1=CC(=CC=C1OC)C(NC2=NC=CC(C)=C2)C3=C(O)C4=NC=CC=C4C=C3	1	1	1	0	0	0	0	0	0
CC1=CC=C2C=CC(C(NC3=NC=CC=C3)C4=CC=CC=C4)=C(O)C2=N1	1	1	1	1	0	0	subs/inhib	0	0
OC1=C(Cl)C(=CC=C1)C(NC2=NC=CC=C2)C3=C(O)C4=NC=CC=C4C=C3	1	0	0	0	0	0	0	0	0
CCOC1=CC=C(NC(=O)CN2C=C(C(=O)C3=CC=CS3)C4=C2C=CC=C4)C=C1	1	1	1	1	0	1	subs/inhib	0	subs/inhib
CC1=CC=CC(NC(C2=CC=CC=C2C)C3=C(O)C4=NC(C)=CC=C4C=C3)=N1	1	1	1	1	0	0	subs/inhib	0	0
CCOC1=CC=C(NC(=O)CN2C=C(C(=O)C3=CC=CC=C3)C4=C2C=CC=C4)C=C1	1	1	1	0	1	1	0	subs/inhib	subs/inhib
COC1=CC=C(Br)C2=C1C3=C(C2)SC(NC(=O)C4=C(SC)C=CC=C4)=N3	0	0	1	0	0	1	0	0	subs/inhib
COC1=CC=C(Br)C2=C1C3=C(C2)SC(NC(=O)C4=CC=CC(C)=C4)=N3	1	0	1	1	0	1	subs/inhib	0	subs/inhib
CC1=C(NC(=O)CN2C=C(C(=O)C3CCCCC3)C4=CC=CC=C24)C=CC=C1Cl	1	1	1	1	1	1	subs/inhib	subs/inhib	subs/inhib
CC1=C(C)C(NC(=O)CN2C=C(C(=O)C3=CC=CO3)C4=CC=CC=C24)=CC=C1	1	1	1	1	1	1	subs/inhib	subs/inhib	subs/inhib
CC1=CC=C(C)C(NC(=O)CN2C=C(C(=O)C3=CC=CO3)C4=CC=CC=C24)=C1	1	1	1	0	1	1	0	subs/inhib	subs/inhib
CC1=CC=CC(C)=C1NC(=O)CN2C=C(C(=O)C3=CC=CO3)C4=CC=CC=C24	1	1	1	1	1	1	subs/inhib	subs/inhib	subs/inhib
CCOC1=CC=C(NC(=O)CN2C=C(C(=O)C3=CC=CO3)C4=CC=CC=C24)C=C1		1	1	1	1	1	NA	subs/inhib	subs/inhib
COC1=CC=CC(=C1)C2=C(O)C(=O)C3=CC(C)=CC=C3O2	1	1	1	1	1	1	subs/inhib	subs/inhib	subs/inhib
CC1=CC(NC(C2=CC=CC=C2F)C3=C(O)C4=C(C=CC=N4)C=C3)=NC=C1	1	0	1	0	0	0	0	0	0
CCOC1=CC(=CC(OCC)=C1OCC)C(=O)NC2=C(C)C=C(C=C2)C3=NC4=C(O3)C=CC=N4	1	0	1	1	0	0	subs/inhib	0	0
COC1=C(OCCN2C(NC(=O)C3=C(Cl)C=CC=C3)=NC4=C2C=CC=C4)C=CC=C1	1	0	1	1	0	1	subs/inhib	0	subs/inhib
NC1=NC(NC2=CC=C(Br)C=C2)=C(C(N)=N1)[S+]([O-])(=O)C3=CC=CC=C3	1	0	1	1	0	1	subs/inhib	0	subs/inhib
CC(C)C1=CC=C(NC2=C(N=C3C=CC=CN23)C4=NC=CC=C4)C=C1	1	0	1	1	0	0	subs/inhib	0	0
COC1=CC=C(NC(=O)CSC2=C(N=C(O2)C3=CC=CS3)[S+]([O-])(=O)C4=CC=C(Br)C=C4)C(OC)=C1		1	1	1	0	1	NA	0	subs/inhib
COC1=C(NC(=O)CSC2=C(N=C(O2)C3=CC=CS3)[S+]([O-])(=O)C4=CC=C(Br)C=C4)C=CC=C1		1	1	1	1	1	NA	subs/inhib	subs/inhib
COC(=O)C1=C(C2=CC=CC=C2)C3=CC=CC=C3[S+]([O-])(=O)N1CC(=O)NC4=C(Cl)C=CC=C4	1	0	1	1	1	1	subs/inhib	1	subs/inhib
COC1=CC=C(NC(=O)C2=C(C)NC3=NC(SCC4=CC=CC=C4C)=NN3C2C5=CC(OC)=C(O)C(OC)=C5)C=C1	0	0	1	0	0	1	0	0	subs/inhib
COC(=O)C1=C(NC2=CC=CC=C2C1=O)SCC(=O)NC3=CC(C)=CC(C)=C3	1	0	1	0	0	1	0	0	subs/inhib
CCN1C=C2N=C(SCC(=O)NC3=CC(OC)=C(OC)C=C3)N(CC4=CC=C(Cl)C=C4)C(=O)C2=N1	0	0	1	1	1	1	1	1	subs/inhib
CCCCN1C=NC2=CC(NCC3=CC=CC=C3Cl)=CC=C12	1	0	1	1	1	1	subs/inhib	1	subs/inhib
CC1=CC=C(NC(=O)CN2C3=C(SC=C3)C(=O)N(CCC(=O)NCC4=CC=C5OCOC5=C4)C2=O)C(C)=C1	0	0	1	1	1	1	1	1	subs/inhib
CC1=CC=CC2=NC(=C(NC3=CC=CC=C3)N12)C4=NC=CC=C4	1	0	1	1	0	0	subs/inhib	0	0
CC1=CC=CC2=NC(=C(NC3=CC=C(F)C=C3)N12)C4=NC=CC=C4	1	0	1	1	0	0	subs/inhib	0	0
CC1=CN2C(C=C1)=NC(=C2NC3=CC=CC=C3C)C4=NC=CC=C4	0	0	1	1	0	0	1	0	0
CC1=CC2=NC(=C(NC3=CC=CC=C3C)N2C=C1)C4=NC=CC=C4	1	0	1	1	0	0	subs/inhib	0	0
ClC1=CC=CC(NC(=O)CN2C3=C(SC=C3)C(=O)N(CCCCCC(=O)NCC4=CC5=C(OCO5)C=C4)C2=O)=C1	1	0	1	1	1	1	subs/inhib	1	subs/inhib
COC1=CC=CC(NC(=O)CN2C3=C(SC=C3)C(=O)N(CC(=O)NCC4=CC=C(C)C=C4)C2=O)=C1	1	0	1	1	1	1	subs/inhib	1	subs/inhib
CC1=CC=C(NC(=O)CN2C(=O)N(CCC(=O)N3CCC4=C(C3)C=CC=C4)C(=O)C5=CC=CC=C25)C(C)=C1	1	0	1	1	0	1	subs/inhib	0	subs/inhib
CC1=CC=CC(NC(=O)CN2C(=O)N(CC3=CC=C(C=C3)C(=O)NCC4=CC=C5OCOC5=C4)C(=O)C6=CC=CC=C26)=C1	1	1	1	0	1	1	0	subs/inhib	subs/inhib
CCOC1=C(NC(=O)CN2C(=O)N(CCC(=O)NCC3=CC4=C(OCO4)C=C3)C(=O)C5=CC=CC=C25)C=CC=C1	1	0	1	1	1	1	subs/inhib	1	subs/inhib
COC1=CC=C(NC(=O)CSC2=NC=C(N2)C3=CC=C(Cl)C=C3)C=C1OC	1	0	1	1	0	1	subs/inhib	0	subs/inhib
COC1=CC=C(C=C1)C2=NC(SCC(=O)NC3=CC4=C(OCO4)C=C3)=C(N2)C5=CC=CC=C5	1	0	1	1	1	1	subs/inhib	1	subs/inhib
FC1=CC=C(C=C1)C2=NC(SCC(=O)NC3=CC4=C(OCO4)C=C3)=C(N2)C5=CC=C(F)C=C5	1	0	1	1	1	1	subs/inhib	1	subs/inhib
COC1=CC=C(C=C1)C2=NC(SCC(=O)NC3=CC4=C(OCO4)C=C3)=C(N2)C5=CC=C(OC)C=C5	1	0	1	1	1	1	subs/inhib	1	subs/inhib
CCOC(=O)C1=CC=C(C=C1)N2C(C3=C(NN=C3C4=CC=CO4)C2=O)C5=CC=C(C)C=C5	1	0	1	1	0	1	subs/inhib	0	subs/inhib
CCC(=O)N1CCC2=CC(=CC=C12)[S+]([O-])(=O)NC(CC3=CC=CC=C3)C(=O)NCC4=CC(OC)=CC=C4		0	1	0	0	1	NA	0	subs/inhib
CC1=NOC(\C=C\C2=CC=CS2)=C1[S+]([O-])(=O)N3CCC(CC3)C(=O)NC4=C(C)C=CC(C)=C4	1	1	1	1	1	1	subs/inhib	subs/inhib	subs/inhib
CC1=NOC(\C=C\C2=CC=CS2)=C1[S+]([O-])(=O)N3CCC(CC3)C(=O)NCC4=CC=C(Cl)C=C4	1	1	1	1	1	1	subs/inhib	subs/inhib	subs/inhib
CCC1=CC=C(C=C1)C2=NC(CSCC(=O)NCC3=CC=C(C)C=C3)=C(C)O2	1	1	1	1	0	1	subs/inhib	0	subs/inhib
COC1=C(CN2C=C(C(=O)C3=CC=C(Cl)C=C3)C(=O)C4=CC5=C(OCCO5)C=C24)C=CC=C1	1	0	1	1	1	1	subs/inhib	1	subs/inhib
COCCCNC(=O)CCC(=O)NNC1=NC2=CC=CC=C2C3=NC(=NN13)C4=CC=CC=C4		0	1	1	0	0	NA	0	0
CC1=NN2C(=N1)C3=CC=CC=C3N=C2NNC(=O)CCC(=O)N4CCN(CC4)C5=CC=CC=C5		0	1	0	0	0	NA	0	0
CCOCCCNC(=O)CCC(=O)NNC1=NC2=CC=CC=C2C3=NC(=NN13)C4=CC=CC=C4		0	1	1	0	0	NA	0	0
CC1=NN2C(=N1)C3=CC=CC=C3N=C2NNC(=O)CCC(=O)N4CCN(CC4)C5=CC=C(F)C=C5		0	1	1	0	1	NA	0	subs/inhib
CC1=NN2C(=N1)C3=CC=CC=C3N=C2NNC(=O)CCC(=O)N4CCN(CC4)C5=CC=CC=C5F		0	1	0	0	0	NA	0	0
CC1CN(CCN1C2=CC=CC(C)=C2)C(=O)CCC(=O)NNC3=NC4=CC=CC=C4C5=NC(C)=NN35	1	0	1	1	0	1	subs/inhib	0	subs/inhib
CC1=NN2C(=N1)C3=CC=CC=C3N=C2NNC(=O)CCC(=O)N4CCN(CC4)C5=CC(Cl)=CC=C5		0	1	0	0	1	NA	0	subs/inhib
CC1=NN2C(=N1)C3=CC=CC=C3N=C2NNC(=O)CCC(=O)N4CCN(CC4)C5=CC(Cl)=CC=C5C		0	1	1	0	1	NA	0	subs/inhib
COC1=CC=C(CN2C(CCC(=O)NC3=CC(OC)=CC=C3)=NC4=CC=CN=C24)C=C1	0	1	1	1	1	1	1	subs/inhib	subs/inhib
COC1=CC=C(CN2C(CCC(=O)NC3=CC=C(C)C(C)=C3)=NC4=CC=CN=C24)C=C1	1	0	1	1	0	1	subs/inhib	0	subs/inhib
COC1=CC=C(CN2C(CCC(=O)NC3=CC(C)=CC(C)=C3)=NC4=CC=CN=C24)C=C1	0	0	1	1	1	1	1	1	subs/inhib
CCC1=CC=C(C=C1)C(=O)C2=CN(CC(=O)NC3=CC=C(OC)C(OC)=C3)C4=CC=C(C)C=C4C2=O	1	0	1	1	0	1	subs/inhib	0	subs/inhib
OC(=O)C1=CC(NC(=O)CSC2=NC(=NC3=C2CC4=C(O3)C=CC=C4)C5=CC=C(F)C=C5)=CC=C1	1	0	0	0	0	0	0	0	0
COC1=CC=CC=C1NC(=O)C2=C(NC(=O)C3=CC=CC=C3C(F)(F)F)C4=C(O2)C=CC=C4	1	0	1	1	0	1	subs/inhib	0	subs/inhib
CCOC(=O)N1CCC2=C(C1)SC3=C2C(=O)N(CC4=CC=CC=C4)C(=O)N3CC(=O)NC5=CC=C(F)C=C5	0	1	1	1	1	1	1	subs/inhib	subs/inhib
CCOC(=O)N1CCC2=C(C1)SC3=C2C(=O)N(CC4=CC=CC=C4)C(=O)N3CC(=O)NC5=CC(C)=CC=C5	0	1	1	1	1	1	1	subs/inhib	subs/inhib
CCOC(=O)N1CCC2=C(C1)SC3=C2C(=O)N(CCC4=CC=CC=C4)C(=O)N3CC(=O)NC5=CC(C)=CC=C5	0	0	1	1	1	1	1	1	subs/inhib
COC1=CC(Cl)=C(C)C=C1NC(=O)CSC2=NC=C(C(=O)N2)[S+]([O-])(=O)C3=CC=C(C=C3)C(C)(C)C		0	1	1	0	1	NA	0	subs/inhib
CCN1CCN(CCCNC(=O)C2=CC3=C(S2)C4=C(C)C=CC=C4OC3)CC1	0	1	0	0	0	0	0	0	0
CC(C)(C)C1=CC=C(C=C1)[S+]([O-])(=O)C2=CN=C(NC2=O)SCC(=O)NC3=CC=C(F)C(Cl)=C3	1	0	1	1	0	1	subs/inhib	0	subs/inhib
COCCN1C(=O)C2=C(N=C1SCC(=O)NC3=CC=C(F)C(Cl)=C3)C4=C(O2)C=CC=C4	0	1	1	1	1	1	1	subs/inhib	subs/inhib
CCOC1=CC=C2N=C(SC2=C1)N3CCC(CC3)C(=O)NC4=C(CC)C=CC=C4	1	0	1	1	1	1	subs/inhib	1	subs/inhib
FC1=CC=C(C=C1)N2CCN(CC2)C(=O)CSC3=NC4=CC=CC=C4N3CC5=CC=CC(F)=C5	1	0	1	1	1	1	subs/inhib	1	subs/inhib
FC1=CC=C(C=C1)N2CCN(CC2)C(=O)CSC3=NC4=CC=CC=C4N3CC5=CC=CC(Cl)=C5	1	0	1	1	1	1	subs/inhib	1	subs/inhib
COC1=CC=CC(CN2C(SCC(=O)N3CCN(CC3)C4=CC=C(F)C=C4)=NC5=CC=CC=C25)=C1	1	0	1	1	0	1	subs/inhib	0	subs/inhib
COC1=CC=C(CN2C(SCC(=O)N3CCN(CC3)C4=CC=C(F)C=C4)=NC5=CC=CC=C25)C=C1	1	0	1	1	1	1	subs/inhib	1	subs/inhib
FC1=CC=C(C=C1)N2CCN(CC2)C(=O)CSC3=NC4=CC=CC=C4N3CC5=CC=C(C=C)C=C5	1	1	1	1	0	1	subs/inhib	0	subs/inhib
CC1=C(CN2C(SCC3=CC=C(C)C=C3)=NC4=CC=NC=C24)N=C(O1)C5=CC=CC=C5C	0	1	1	1	1	1	1	subs/inhib	subs/inhib
CC1=C(CN2C(SCC3=C(F)C=CC=C3)=NC4=CC=NC=C24)N=C(O1)C5=CC=CC=C5F	0	0	1	1	0	1	1	0	subs/inhib
CC1=C(CN2C(SCC3=C(F)C=CC=C3)=NC4=CC=NC=C24)N=C(O1)C5=CC(Cl)=CC=C5	0	0	1	1	1	1	1	1	subs/inhib
CC1=CC(C)=C(CN2C3=CC=CC=C3C4=C2C(=O)N(CC(=O)NCC5=CC=CC=N5)N=C4)C(C)=C1	1	0	1	0	0	1	0	0	subs/inhib
CC1CCN(CC1)C(=O)C2=CC=C(CSC3=NC4=CC=NC=C4N3CC5=CC=CC(C)=C5)C=C2	1	1	1	1	1	1	subs/inhib	subs/inhib	subs/inhib
CC1=CC=C(CN2C(SCC3=CC=C(C=C3)C(=O)N4CCCCCC4)=NC5=CC=NC=C25)C=C1	1	1	1	0	1	1	0	subs/inhib	subs/inhib
CNC(=O)C1=CC=C(CSC2=NC3=CC=NC=C3N2CC4=CC=C(C)C=C4)C=C1	0	0	0	1	0	1	1	0	1
COC1=CC=C(CN2C(SCC3=CC=C(C=C3)C(=O)NC4CCCC4)=NC5=CC=NC=C25)C=C1	1	1	1	1	1	1	subs/inhib	subs/inhib	subs/inhib
CC1=C2C=NN(CC(=O)NCC3=CC=CC=C3)C(=O)C2=C(C)N1CC4=CC=C(C)C=C4	0	0	1	0	1	0	0	1	0
CCOC1=CC=C(C=C1)C2=CC(NC(=O)NC3=CC=CC=C3Cl)=C(S2)C(=O)OC	1	0	1	1	0	0	subs/inhib	0	0
CC1=CC=CN2C(=O)C3=C(N=C12)N(C4=NN=C(SCC5=CC=C(Cl)C=C5)S4)C(=O)C(=C3)C#N	1	0	1	1	0	0	subs/inhib	0	0
CC1=CN2C(=O)C3=C(N=C2C=C1)N(C4=NN=C(SCC5=CC=CC=C5)S4)C(=O)C(=C3)C#N	1	0	1	1	0	0	subs/inhib	0	0
CN(C)[S+]([O-])(=O)N1C=C(\C=C(/NC(=O)C2=CC=CC=C2)C(=O)NCCCN3C=CN=C3)C4=C1C=CC=C4	0	0	1	1	1	1	1	1	subs/inhib
CCN1C=C(\C=C(/NC(=O)C2=CC=C(C)C=C2)C(=O)NCCCN3C=CN=C3)C4=C1C=CC=C4	0	1	1	1	1	1	1	subs/inhib	subs/inhib
NC1=C(N2C=CC=CC2=C1C3=NC(=CS3)C4=CC5=C(OCO5)C=C4)C(=O)C6=CC=CC=C6	1	0	1	1	0	1	subs/inhib	0	subs/inhib
CCOCC1=CC(CN2CCN(CC2)C3=C(OC)C=CC=C3)=C(O)C4=NC=CC=C14	0	1	1	0	0	0	0	0	0
CCOCC1=CC(CN2CCN(CC2)C3=CC=CC(Cl)=C3)=C(O)C4=NC=CC=C14	1	1	1	0	0	0	0	0	0
CCOCC1=CC(CN2CCN(CC2)C3=CC=CC(=C3)C(F)(F)F)=C(O)C4=NC=CC=C14	1	0	1	0	0	0	0	0	0
CCCOCC1=CC(CN2CCN(CC2)C3=C(OC)C=CC=C3)=C(O)C4=NC=CC=C14	1	1	1	1	0	0	subs/inhib	0	0
CCCOCC1=CC(CN2CCN(CC2)C3=CC=CC(Cl)=C3)=C(O)C4=NC=CC=C14	1	1	1	1	0	0	subs/inhib	0	0
CC(C)OCC1=CC(CN2CCN(CC2)C3=CC=CC=C3)=C(O)C4=NC=CC=C14	1	1	1	0	0	0	0	0	0
CC(C)OCC1=CC(CN2CCN(CC2)C3=CC=CC(=C3)C(F)(F)F)=C(O)C4=NC=CC=C14	1	0	1	0	0	0	0	0	0
CCCCOCC1=CC(CN2CCN(CC2)C3=CC=CC(Cl)=C3)=C(O)C4=NC=CC=C14	1	1	1	0	0	0	0	0	0
CCOC(=O)C1=CC=C(NC(=O)C2=CC(=O)C3=C(O2)C(C)=C(C)C=C3)C=C1	1	1	1	0	0	1	0	0	subs/inhib
CCOC1=CC=C(C=C1OCC)C2=NON=C2NC(=O)C3=C(C)C4=C(O3)C(C)=C(C)C=C4		0	1	1	0	1	NA	0	subs/inhib
CC1=NC2=NC(NC(=O)C3=CC(Cl)=CC=C3)=NN2C(O)=C1CC4=CC=CC=C4	0	0	0	0	0	0	0	0	0
OC1=NC(=NC2=C1N=NN2CC3=CC=CC=C3C#N)C4CCCN(C4)[S+]([O-])(=O)C5=CC=C(F)C=C5	0	0	1	1	1	1	1	1	subs/inhib
COC1=CC=C(NC(=O)C2=C(Cl)C=NC(SCC3=CC=C(F)C=C3)=N2)C=C1	1	1	1	1	0	1	subs/inhib	0	subs/inhib
CCC1=CC=C(CN(CC2=CC=CO2)C(=O)COC3=CC=CC=C3Cl)C=C1	1	1	1	1	1	1	subs/inhib	subs/inhib	subs/inhib
COC1=CC=C(CCNC(=O)C2=C(Cl)C=NC(SCC3=C(F)C=CC=C3)=N2)C=C1OC	1	0	1	1	0	1	subs/inhib	0	subs/inhib
COC1=CC=C(CNC(=O)C2=C(Cl)C=NC(SCC3=C(F)C=CC=C3)=N2)C=C1	1	1	1	0	1	1	0	subs/inhib	subs/inhib
CCOC(=O)C1=C(C)N=C(NC(=O)C2=C(C3=CC=CC=C3)C(=NN(C)C2=O)C4=CC=CC=C4)S1	0	0	1	0	0	0	0	0	0
CC1=CC=C(C=C1)[S+]([O-])(=O)N2CCC3=C2C=CC(=C3)C(=O)NC4=CC=C(C=C4)C(F)(F)F	1	0	1	1	0	0	subs/inhib	0	0
CC1=CC=C(C)C(NC2=NC3=NON=C3N=C2NC4=CC=CC(C)=C4C)=C1	1	0	1	0	0	1	0	0	subs/inhib
CC1=C(Cl)C=C(NC2=NC3=NON=C3N=C2NC4=CC(=CC=C4)C(F)(F)F)C=C1	1	0	1	1	1	0	subs/inhib	1	0
CCOC(=O)C1=CC=C(NC2=NC3=NON=C3N=C2NC4=CC=CC(C)=C4C)C=C1	1	0	1	0	0	0	0	0	0
COC1=C(NC(=O)CSC2=NC(C3=CC=C(C=C3)C(C)(C)C)=C(C#N)C(=O)N2)C=CC=C1	1	0	1	1	0	1	subs/inhib	0	subs/inhib
CC(C)(C)C1=CC=C(C=C1)C2=C(C#N)C(=O)NC(SCC(=O)NC3=CC=C(Cl)C=C3)=N2		0	1	1	0	1	NA	0	subs/inhib
CCOC(=O)C1=CC=C(NC(=O)CSC2=NC(C)=NC(=C2)C3=CC=CC=C3)C=C1	1	0	1	1	0	0	subs/inhib	0	0
COC1=CC=C(C=C1)C2=NOC(CCCC(=O)NC3=C(C)C(Cl)=CC=C3)=N2	1	0	1	1	0	1	subs/inhib	0	subs/inhib
COC1=CC=C(C=C1)C(=O)NC2=CC3=C(OC(=N3)C4=CC=C(OC)C=C4)C=C2	0	0	1	1	0	1	1	0	subs/inhib
CCC1=CC=C(OCCN2C3=CC=CC=C3N=C2C4CN(CC5=CC=C(F)C=C5)C(=O)C4)C=C1	0	1	1	0	1	1	0	subs/inhib	subs/inhib
CC1=CC=C(C=C1)[S+]([O-])(=O)NC2=NN3C(C=C(NC3=N2)C4=CC=CC=C4)C5=CC=C(F)C=C5				0	0	1	NA	NA	NA
CC(=O)NC1=CC=C(C)C=C1C2=NC3=C(C=CC=C3)N(CC(=O)NC4=CC(Cl)=CC=C4C)C2=O	0	1	1	1	1	1	1	subs/inhib	subs/inhib
COC1=C(OC)C=C(CNC(=O)NC2=CC3=C(SC4=CC=CC=C4C(=O)N3C)C=C2)C=C1	1	0	1	0	1	1	0	1	subs/inhib
CCOC1=C(NC(=O)NC2=NN=C(S2)N3CCCC(C)C3)C=CC=C1	1	0	1	0	0	1	0	0	subs/inhib
COC1=C(OC)C=C(CC(=O)NC2=C(OC3=CC=CC=C23)C(=O)N4CCN(CC4)C5=CC=CC=C5F)C=C1	1	1	1	0	0	1	0	0	subs/inhib
CC1=NN(CC(=O)NCCC2=CC=CC=C2)C(=O)C3=C1SC4=CC=CC=C34		0	1	0	0	1	NA	0	subs/inhib
CC(N1N=C(C)C2=C(C3=CC=CC=C3S2)C1=O)C(=O)NCC4=CC=C(C)C=C4	1	0	1	1	0	1	subs/inhib	0	subs/inhib
CCOC1=CC=C(CCNC(=O)CCCN2N=C(C)C3=C(C4=CC=CC=C4S3)C2=O)C=C1OCC	1	0	1	1	0	1	subs/inhib	0	subs/inhib
CC1=CC=CC=C1C(=O)NC2=CC=CC(=C2)C3=NC4=CC=CN=C4S3	1	0	1	1	1	1	subs/inhib	1	subs/inhib
CCC(SC1=NC2=C(N=CC=N2)C(=O)N1CC3=CC=C(C)C=C3)C(=O)NC4CCCCC4	0	0	1	1	0	1	1	0	subs/inhib
COC1=CC=C(NC(=O)CN2C=CN(C(=O)C2=O)C3=CC(C)=C(C)C=C3)C=C1Cl	0	0	0	0	0	1	0	0	1
COC1=C(OC)C=C(C=C1)N2C=CN(CC(=O)NC3=CC=C(C)C(C)=C3)C(=O)C2=O	0	0	1	0	0	0	0	0	0
CCOC1=C(OC)C=C(CNC(=O)CN2C(=O)C3=CC=CN3C4=CC=C(F)C=C24)C=C1	0	0	1	0	0	1	0	0	subs/inhib
COC1=CC=CC=C1CNC(=O)C2CCCN(C2)C3=NC4=CC=CC=C4N5C=CC=C35	1	1	1	1	1	1	subs/inhib	subs/inhib	subs/inhib
CC1=CC=CC=C1CNC(=O)CCCN2C(=O)C3=CC=CN3C4=CC=CC=C24	1	1	1	1	1	1	subs/inhib	subs/inhib	subs/inhib
CCOC1=CC=C(CNC(=O)CN2C(=O)C3=CC=CN3C4=CC=C(F)C=C24)C=C1	1	0	1	0	0	1	0	0	subs/inhib
COC1=CC=C2C(=C1)N(CC3=C(Cl)C=C(F)C=C3)C(C(O)=O)=C2CNCCC4=CC=CC=C4OC	1	0	1	0	0	1	0	0	subs/inhib
CCOC(=O)C1=CC=C(NC(=O)CCN2C(=O)C3=CC=CN3C4=CC=CN=C24)C=C1	1	0	1	0	0	1	0	0	subs/inhib
CC1=CC=CC=C1CNC(=O)CCCN2C(=O)C3=CC=CN3C4=CC=CN=C24	1	0	1	0	1	1	0	1	subs/inhib
CC1=CC(NC(=O)CN2C3=C(OC4=C3C=CC=C4)C(=O)N(C2=O)C5=CC=C(C)C(C)=C5)=CC(C)=C1	1	0	1	1	1	0	subs/inhib	1	0
ClC1=CC=C(C=C1)N2C(=O)N(CC(=O)NC3=CC=CC=C3)C4=C(OC5=C4C=CC=C5)C2=O	0	0	1	1	1	1	1	1	subs/inhib
O=C(CN1C2=C(OC3=C2C=CC=C3)C(=O)N(CC4=CC=CO4)C1=O)NC5=CC=CC=C5	0	1	1	1	1	1	1	subs/inhib	subs/inhib
COC1=CC=C(Cl)C=C1NC(=O)CN2C(=O)CSC3=CC=C(C=C23)[S+]([O-])(=O)N4CCCC4	1	0	1	1	1	1	subs/inhib	1	subs/inhib
COC1=CC=CC(CNC(=O)C2CCCN(C2)C3=NN4C=C(N=C4S3)C5=CC=C(C)C=C5)=C1	1	0	1	1	1	1	subs/inhib	1	subs/inhib
FC1=C(CN2C(SCC3=CC=C(C=C3)C(=O)NC4CCCCC4)=NC5=CC=CN=C25)C=CC=C1	1	1	1	1	1	1	subs/inhib	subs/inhib	subs/inhib
CC(=O)C1=CC=C(NC(=O)CN2C=C(C3=C2C=CC=C3)[S+]([O-])(=O)CC4=C(Cl)C=CC=C4)C=C1	1	0	1	1	1	1	subs/inhib	1	subs/inhib
CC1=C2C(=NN1C3=CC=CC=C3)C(=O)N(CCCC(=O)NC4=CC=C(Cl)C=C4C)N=C2C	1	0	1	0	0	1	0	0	subs/inhib
COC1=CC(OC)=C(CCNC(=O)CN2N=C(C)C3=C(C)N(N=C3C2=O)C4=CC=C(C)C=C4)C=C1	1	0	1	1	1	1	subs/inhib	1	subs/inhib
CC1=C2C(=NN1C3=CC=CC=C3)C(=O)N(CC(=O)NC4=CC=C(Cl)C=C4C)N=C2C	0	0	1	0	0	0	0	0	0
COC1=CC=CC=C1NC(=O)CN2C(=O)N(CC3=NC(=NO3)C4=CC=CC=C4)C(=O)C5=CC=CC=C25		0	1	1	1	1	NA	1	subs/inhib
CC(=O)C1=CC=C(NC(=O)C2CCN(CC2)C3=NN=C(C)C4=C(C)N(N=C34)C5=CC=CC=C5)C=C1	0	0	0	1	0	0	1	0	0
CC1=C2C(=NN1C3=CC=CC=C3)C(=NN=C2C)N4CCC(CC4)C(=O)NCCC5=C(Cl)C=CC=C5	1	0	1	1	1	1	subs/inhib	1	subs/inhib
COC1=CC=C(C=C1)N2N=C3C(=C2C)C(C)=NN=C3N4CCCC(C4)C(=O)NCC5=CC=CC=C5C	1	0	1	1	1	1	subs/inhib	1	subs/inhib
COC1=CC=C(C=C1)N2N=C3C(=C2C)C(C)=NN=C3N4CCCC(C4)C(=O)NCC5=CC=CC(F)=C5	1	0	1	1	1	1	subs/inhib	1	subs/inhib
CCC1=CC=C(CNC(=O)C2CCCN(C2)C3=NN=C(C)C4=C(C)N(N=C34)C5=CC=C(OC)C=C5)C=C1	1	0	1	1	1	1	subs/inhib	1	subs/inhib
COC1=CC=C(C=C1)N2N=C3C(=C2C)C(C)=NN=C3N4CCCC(C4)C(=O)NCCC5=C(C)C=CC=C5	1	0	1	1	1	1	subs/inhib	1	subs/inhib
COC1=CC=C(CNC(=O)C2CCCN(C2)C3=NN=C(C)C4=C(C)N(N=C34)C5=CC=C(C)C=C5)C=C1	1	0	1	1	0	1	subs/inhib	0	subs/inhib
CC1=C2C(=NN1C3=CC=C(C)C=C3)C(=NN=C2C)N4CCCC(C4)C(=O)NCC5=CC=CC=C5C	1	1	1	1	1	1	subs/inhib	subs/inhib	subs/inhib
CC1=NN=C2N1C(NC3=C(C)C=C(C)C=C3)=NC4=CC=CC=C24	1	1	1	1	0	1	subs/inhib	0	subs/inhib
COC1=C(Cl)C=C(NC(=O)C2CCCN(C2)C3=NN=C(C)C4=C(C)N(N=C34)C5=CC=CC=C5)C=C1	0	0	1	1	0	1	1	0	subs/inhib
CCOC1=CC=C(CCNC(=O)C2CCCN(C2)C3=NN=C(C)C4=C(C)N(N=C34)C5=CC=CC=C5)C=C1	1	0	1	1	1	1	subs/inhib	1	subs/inhib
CCC1=CC=C(CNC(=O)C2CCCN(C2)C3=NN=C(C)C4=C(C)N(N=C34)C5=CC=CC=C5)C=C1	1	1	1	1	0	1	subs/inhib	0	subs/inhib
CC1=C2C(=NN1C3=CC=CC=C3)C(SCC(=O)NCC4=C(Cl)C=CC=C4)=NN=C2C	1	0	1	1	0	1	subs/inhib	0	subs/inhib
COC1=CC=CC(CNCC2=CC=CN2C3=NN=C(S3)N4CCN(CC4)C5=CC=CC=C5)=C1	1	1	1	1	1	1	subs/inhib	subs/inhib	subs/inhib
CC1=CC=C(C=C1)C(=O)C2=CN(CC(=O)NC3=CC=C4OCCOC4=C3)C5=NC(C)=CC=C5C2=O	0	0	1	1	0	1	1	0	subs/inhib
COC(=O)C1=C(NC2=CC=C(Cl)C=C2C1=O)SCC(=O)NC3=C(C=CC=C3)C(F)(F)F	1	0	1	1	1	1	subs/inhib	1	subs/inhib
CC(C)(C)C1=CC=C(C=C1)C2=NC3=CC(=O)NN3C(SCCCOC4=CC=CC=C4)=N2	0	0	0	0	0	1	0	0	1
CC1=CC(OCCCSC2=NC(=NC3=CC(=O)NN23)C4=CC=C(C=C4)C(C)(C)C)=CC=C1Cl	0			0	0	0	0	NA	NA
CC1=C(C)C(OCCCSC2=NC(=NC3=CC(=O)NN23)C4=CC=C(C=C4)C(C)(C)C)=CC=C1	0			0	0	0	0	NA	NA
ClC1=CC=C(OCCSC2=NC(=NC3=CC(=O)NN23)C4=CC=CS4)C=C1	1	0	1	0	0	1	0	0	subs/inhib
CCCNC(=O)C1CCC(CN2C(=O)N(CC(=O)NCC3=CC=CC=C3)C4=C(SC=C4)C2=O)CC1	1	0	1	1	0	1	subs/inhib	0	subs/inhib
CC1=CC(N2CCN(CC2)C(=O)C3CCN(CC3)[S+]([O-])(=O)C4=CC5=C(NC(=O)O5)C=C4)=C(C)C=C1	0	0	1	1	0	0	1	0	0
CC1=C(Br)C=CC(NC(=O)C2CCN(CC2)[S+]([O-])(=O)C3=CC4=C(NC(=O)O4)C=C3)=C1	0	0	1	1	0	1	1	0	subs/inhib
CC1=CC=C(C=C1C)C2=NC3=C(C=CC=C3)N(CC(=O)NC4=CC=CC=C4F)C(=O)C2	1	1	1	0	1	1	0	subs/inhib	subs/inhib
COC1=CC=C(C=C1)C2=NNC3=C2C=NC4=C3C=C(OC)C(OC)=C4	0	1	0	0	0	0	0	0	0
CCN(CC)[S+]([O-])(=O)C1=CC=C2N(C)C(CN(C)C(=O)NC3=CC(Cl)=CC=C3)=NC2=C1	1	0	1	1	0	0	subs/inhib	0	0
COC1=CC=C(NC(=O)CSC2=NC3=CC=CC=C3N2CC4=CC(OC)=CC=C4)C=C1	1	1	1	1	1	1	subs/inhib	subs/inhib	subs/inhib
COC1=CC=C(CNC(=O)CN2C(SCC(=O)NC3=CC=C(C)C(C)=C3)=NC4=CC=CC=C24)C=C1	1	1	1	1	0	1	subs/inhib	0	subs/inhib
CN1N=C(C(=O)N2CCN(CC2)C3=CC(C)=CC=C3C)C4=C1C5=CC(C)=CC=C5SC4	1	0	1	1	0	1	subs/inhib	0	subs/inhib
CC1=CC=C(CNC(=O)C2CCN(CC2)[S+]([O-])(=O)C3=C(ON=C3C)\C=C\C4=C(F)C=CC=C4)O1	1	1	1	0	0	1	0	0	subs/inhib
CCOC1=CC=CC=C1CNC(=O)C2CCN(CC2)[S+]([O-])(=O)C3=C(ON=C3C)\C=C\C4=C(F)C=CC=C4	1	0	1	1	0	1	subs/inhib	0	subs/inhib
CCOC(=O)C1=CC(=NN1)[S+]([O-])(=O)N2CCN(CC2)C3=CC(Cl)=CC=C3C	1	0	1	1	0	0	subs/inhib	0	0
CCOC1=CC=C(C=C1OCC)C(=O)NCC[S+]([O-])(=O)N2CCN(CC2)C3=C(F)C=CC=C3	1	0	1	1	1	1	subs/inhib	1	subs/inhib
CC(C)C1=C(SCC(=O)NC2=CC(C)=CC(C)=C2)C3=C(N=C1)N(C)C(=O)N(C)C3=O	0	0	1	0	1	1	0	1	subs/inhib
CC1=CC=C(OCC(=O)NC2=CC=CC(OCC3=CC(=O)N4C=CC=C(C)C4=N3)=C2)C=C1C	1	1	1	1	0	1	subs/inhib	0	subs/inhib
COC1=CC(OC)=CC(NC(=O)CSC2=NC3=C(C=CC=C3)N=C2CC4=CC=CC=C4OC)=C1		1	1	1	1	1	NA	subs/inhib	subs/inhib
CC1=CC=CN2C(=O)C=C(CSC3=NN=C(NC(=O)COC4=CC=CC=C4)S3)N=C12	1	0	0	1	0	1	subs/inhib	0	1
ClC1=CC(NC(=O)NC2=C(OCC3=CC(=O)N4C=CC=CC4=N3)C=CC=C2)=CC=C1	1	0	1	1	0	1	subs/inhib	0	subs/inhib
COC1=CC=C(CN2C=CN=C2SCC(=O)NC3=NC4=C(S3)C=CC=C4)C=C1	1	1	1	1	1	1	subs/inhib	subs/inhib	subs/inhib
COC(=O)C1=C2C=CC=CC2=C(N=C1)N3CCN(CC3)C4=CC=C(OC)C=C4	1	0	1	1	0	0	subs/inhib	0	0
CC1=CC2=C(C=C1)N=C(NC(=O)CSC3=NC=CN3CC4=CC=CC=C4)S2	1	0	1	1	1	1	subs/inhib	1	subs/inhib
FC1=CC=C(CN2C=CN=C2SCC(=O)NC3=NC4=C(S3)C=CC=C4)C=C1	1	1	1	1	0	1	subs/inhib	0	subs/inhib
CCC1=CC=C(C=C1)[S+]([O-])(=O)NCC2=CC=C3N(CCC3=C2)C(=O)C4=CC=C(C)C=C4	1	0	1	1	1	1	subs/inhib	1	subs/inhib
CCOC1=CC=C(C=C1)[S+]([O-])(=O)NCC2=CC=C3N(CCC3=C2)C(=O)C4=CC=C(C)C=C4	1	0	1	1	1	1	subs/inhib	1	subs/inhib
COC(=O)C1=C(ON=C1C2=CC=C(Cl)C=C2)N3CCN(CC3)C4=C(OC)C=CC=C4	1	1	1	0	0	1	0	0	subs/inhib
CCOC1=CC(CNC(=O)C2=CC(NC(=O)C3=NSC4=C3C=CC=C4)=C(C)C=C2)=CC=C1OC	1	0	1	1	0	1	subs/inhib	0	subs/inhib
COC1=C(NC(=O)C2=CC(C)=CC(C)=C2)C=C(C=C1)C3=CN4C=CC=NC4=N3	1	0	1	1	0	1	subs/inhib	0	subs/inhib
COC1=C(NC(=O)COC2=CC=CC=C2)C=C(C=C1)C3=CN4C=CC=NC4=N3	1	0	1	1	0	0	subs/inhib	0	0
CCOC(=O)C1=CC=C(NC(=O)CSC2=NC3=C(NC4=C3C=CC=C4)C(=O)N2C)C=C1	0	0	1	1	0	1	1	0	subs/inhib
CCC1=NN=C(NC(=O)CSC2=NC3=C(NC4=C3C=CC=C4)C(=O)N2C5=CC=C(OC)C=C5)S1	1	0	1	1	1	1	subs/inhib	1	subs/inhib
OC1=C(C=CC2=C1N=CC=C2)C(NC3=NC=CC=C3)C4=CC=CC=C4F	1	0	1	0	0	0	0	0	0
CC1=CC=C(CN2C=CN=C2SCC(=O)NC3=NC4=C(S3)C=CC=C4)C=C1	1	1	1	1	0	1	subs/inhib	0	subs/inhib
COC1=CC=C(CC(=O)NCC(C2=CC=CS2)[S+]([O-])(=O)C3=CC=C(Cl)C=C3)C=C1	1	1	1	1	1	1	subs/inhib	subs/inhib	subs/inhib
COC1=C(OC)C=C(NC(=O)CSC2=NN=C(NC(=O)NC3CCCCC3)S2)C=C1	1	0	1	0	0	1	0	0	subs/inhib
COC1=CC=C(CNC(=O)C(=O)NC2=C3CSCC3=NN2C4=CC=CC=C4)C=C1		0	1	1	0	1	NA	0	subs/inhib
CC(NC(=O)C(=O)NC1=C2CSCC2=NN1C3=CC=CC=C3)C4=CC=CC=C4		0	1	1	0	1	NA	0	subs/inhib
CCOCCCNC(=O)C(=O)NC1=C2CSCC2=NN1C3=CC=C(OC)C=C3		0	1	0	0	0	NA	0	0
CC(=O)N1N2C=NN=C2SC(C(C)=O)=C1C3=CC=C(Cl)C(Cl)=C3	1	1	1	1	0	1	subs/inhib	0	subs/inhib
CC(O)CNC(=O)C(=O)NC1=C2CSCC2=NN1C3=CC=C(Cl)C=C3		0	0	1	0	0	NA	0	0
COCCCNC(=O)C(=O)NC1=C2CSCC2=NN1C3=CC(Cl)=CC=C3		0	1	1	0	1	NA	0	subs/inhib
OC1=C(SC2=NC(=NN12)C3=CC=CO3)C(N4CCN(CC5=CC=CC=C5)CC4)C6=C(Cl)C=C(Cl)C=C6	1	0	1	1	1	1	subs/inhib	1	subs/inhib
OC1=C(SC2=NC(=NN12)C3=CC=CO3)C(N4CCN(CC4)C5=CC(Cl)=CC=C5)C6=CC=CC=C6	1	0	1	1	0	1	subs/inhib	0	subs/inhib
FC1=CC(=CC=C1)C2=C(N=NC(SCC(=O)NC3CCCCC3)=N2)C4=CC(F)=CC=C4	1	0	1	1	0	1	subs/inhib	0	subs/inhib
CCC1=NC2=CC=C(C=C2N=C1CC)C(=O)N3CCN(CC3)C4=C(C)C=CC(C)=C4	1	0	1	1	0	1	subs/inhib	0	subs/inhib
CN1C2=CC(NC(=O)CC3=CC=C(Cl)C=C3)=CC=C2SC4=C(C=CC=C4)C1=O	1	0	1	0	1	0	0	1	0
COC1=CC=C(CCNC(=O)CSC2=NC3=C(C=CC=C3)C4=NC(CCC(=O)NCC5=C(OC)C=CC=C5)C(=O)N24)C=C1OC	0	0	1	1	0	1	1	0	subs/inhib
CC1=CC=C(CSC2=NC3=C(C=CC=C3)C4=NC(CC(=O)NCC5=CC=CS5)C(=O)N24)C=C1	1	1	1	1	1	1	subs/inhib	subs/inhib	subs/inhib
FC1=CC=C(CSC2=NC3=C(C=CC=C3)C4=NC(CC(=O)NC5CCCCC5)C(=O)N24)C=C1	0	1	1	1	1	1	1	subs/inhib	subs/inhib
CC(C)C1=CC=C(NC(=O)CSC2=NC3=C(C=CC=C3)C4=NC(CC(=O)NC5CCCCC5)C(=O)N24)C=C1	1	1	1	0	1	1	0	subs/inhib	subs/inhib
FC1=C(CN2C(=O)C3=C(C=CS3)N=C2SCC(=O)NCC4=CC=CC=C4Cl)C=CC=C1	1	1	1	1	1	1	subs/inhib	subs/inhib	subs/inhib
ClC1=CC=C(CSC2=NC3=C(C=CC=C3)C4=NC(CC(=O)NCCC5=CC=CC=C5)C(=O)N24)C=C1	0	1	1	1	1	1	1	subs/inhib	subs/inhib
COC1=CC=C(C=C1CSC2=NC3=C(C=CC=C3)C(NCC4=CC=CC=C4)=N2)C(C)=O	1	0	1	1	1	1	subs/inhib	1	subs/inhib
COC1=C(OC)C=C(CCNC2=NC(SCC3=CC(F)=CC=C3)=NC4=CC=CC=C24)C=C1	1	1	1	1	1	1	subs/inhib	subs/inhib	subs/inhib
COC1=C(OC)C=C(CCNC2=NC(SCC3=CC=CC=C3F)=NC4=CC=CC=C24)C=C1	1	1	1	1	1	1	subs/inhib	subs/inhib	subs/inhib
CCC(SC1=NC2=C(C=CC=C2)C3=NC(CCN4C=NC=C4C)=NN13)C(=O)NC5=CC(OC)=CC=C5	0	1	1	1	0	1	1	0	subs/inhib
CC1=CN=CN1CCC2=NN3C(=N2)C4=C(C=CC=C4)N=C3SCC(=O)NC5=CC=CC(C)=C5	0	1	1	1	1	1	1	subs/inhib	subs/inhib
CC1=CN=CN1CCC2=NN3C(=N2)C4=C(C=CC=C4)N=C3SCC(=O)NC5=CC=CC(Cl)=C5	0	1	1	1	1	1	1	subs/inhib	subs/inhib
COC1=C(OC)C=C(CCNC2=NC(SCC3=C(Cl)C=CC=C3)=NC4=CC=CC=C24)C=C1	1	1	1	1	1	1	subs/inhib	subs/inhib	subs/inhib
CCOC1=CC=CC=C1NC(=O)CSC2=NC3=C(C=CC=C3)C4=NC(CCN5C=NC=C5C)=NN24	0	1	1	1	0	1	1	0	subs/inhib
CC1=CN=CN1CCC2=NN3C(=N2)C4=C(C=CC=C4)N=C3SCC(=O)NC5=CC=C(C)C(F)=C5	0	1	1	1	1	1	1	subs/inhib	subs/inhib
CC1=CC=C(CN2C(=O)C3=C(C=CS3)N=C2SCC(=O)NCC4=CC=CC=C4)C=C1	1	1	1	1	1	1	subs/inhib	subs/inhib	subs/inhib
CN1N=CC2=C1N=CN=C2N3CCN(CC3)C4=CC=C(C=C4)C(C)=O	0	0	0	0	0	0	0	0	0
ClC1=CC=CC(=C1)N2N=CC3=C2N=CN=C3NCCCN4C=CN=C4	0	0	0	1	1	1	1	1	1
CC1=C(Cl)C=C(C=C1)N2N=CC3=C2N=CN=C3NCCCN4C=CN=C4	0	0	0	1	1	1	1	1	1
CCOC(=O)C1=C(NC(=O)C2=CC=C(C=C2)[S+]([O-])(=O)N(C)C3CCCCC3)SC4=C1CCN(C4)C(C)C	1	0	1	1	1	1	subs/inhib	1	subs/inhib
CC1=C(C=CC=C1)N2C(=O)C3=C(NN=C3)N=C2SCC4=CC=C(Cl)C=C4	0	0	1	1	0	1	1	0	subs/inhib
COC1=CC=CC=C1NC2=NC(=NC3=CC=CC=C23)C4=C(F)C=CC=C4	1	0	1	0	0	0	0	0	0
[O-][S+]1C2=CC=CC=C2C(=O)N(CC3=CC=CC(Cl)=C3)C4=C1C=CC(=C4)C(=O)NCC5=CC=CO5	1	1	1	1	1	1	subs/inhib	subs/inhib	subs/inhib
CCC1=CC=C(C=C1)N2C(=O)C3=C(NN=C3)N=C2SCC4=C(Cl)C=CC=C4	0	0	1	0	0	1	0	0	subs/inhib
CCC1=CC=C(C=C1)N2C(=O)C3=C(NN=C3)N=C2SCC4=CC=CC(F)=C4	1	0	1	0	0	1	0	0	subs/inhib
CCC1=CC=C(C=C1)N2C(=O)C3=C(NN=C3)N=C2SCC4=C(C)C=CC=C4	0	0	1	0	1	1	0	1	subs/inhib
CC1=C(C)C=C(C=C1)N2C(=O)C3=C(NN=C3)N=C2SCC4=C(F)C=CC=C4	1	0	1	0	0	1	0	0	subs/inhib
CC1=C(C)C=C(C=C1)N2C(=O)C3=C(NN=C3)N=C2SCC4=CC=CC(F)=C4	1	0	1	1	1	1	subs/inhib	1	subs/inhib
CC1=C(C)C=C(C=C1)N2C(=O)C3=C(NN=C3)N=C2SCC4=C(C)C=CC=C4	1	0	1	0	0	1	0	0	subs/inhib
COC(=O)C1=CC=C(C=C1)C2C=C(NC3=NC4=C(C=CC=C4)N23)C5=CC=C(Cl)C=C5	1	1	1	1	1	0	subs/inhib	subs/inhib	0
CCC1=CC=C(C=C1)C2=CC(N3C(N2)=NC4=C3C=CC=C4)C5=C(OC)C(OC)=CC=C5	0		1	1	0	1	1	NA	subs/inhib
CCC1=CC=C(C=C1)C2=CC(N3C(N2)=NC4=C3C=CC=C4)C5=CC(C)=CC=C5	1	0	1	1	1	0	subs/inhib	1	0
CC1=CC=C(C=C1)C2=CC(N3C(N2)=NC4=C3C=CC=C4)C5=C(C)C=CC=C5	0		1	1	1	1	1	NA	subs/inhib
CCC1=CC=C(C=C1)C2=CC(N3C(N2)=NC4=C3C=CC=C4)C5=C(F)C=CC=C5Cl	1	0	1	1	0	0	subs/inhib	0	0
CC1=C(C)C=C(C=C1)C2=CC(N3C(N2)=NC4=C3C=CC=C4)C5=C(F)C=CC=C5	1	0	1	1	0	1	subs/inhib	0	subs/inhib
COC1=CC(=CC(OC)=C1OC)C(=O)NC(C2=CC=C(Cl)C=C2)C3=C(O)C4=C(C=CC=N4)C(Cl)=C3	0	0	1	0	0	0	0	0	0
COC1=CC(=CC(OC)=C1OC)C(=O)NC(C2=C(Cl)C=CC=C2)C3=C(O)C4=C(C=CC=N4)C(Cl)=C3	0	0	1	0	0	0	0	0	0
CCOC1=CC=C(C=C1)C(NC(=O)C2=CC(OC)=C(OC)C(OC)=C2)C3=C(O)C4=C(C=CC=N4)C(Cl)=C3	1	0	0	0	0	0	0	0	0
COC1=CC=C(C=C1)C(=O)NC(C2=CC=C(Cl)C=C2)C3=C(O)C4=C(C=CC=N4)C(Cl)=C3	0	0	1	0	0	0	0	0	0
COC1=CC=CC(=C1)C(=O)NC(C2=CC=C(Cl)C=C2)C3=C(O)C4=C(C=CC=N4)C(Cl)=C3	0	0	1	0	0	0	0	0	0
COC1=CC=C(C=C1)C(=O)NC(C2=C(Cl)C=CC=C2)C3=C(O)C4=C(C=CC=N4)C(Cl)=C3	0		1	1	1	0	1	NA	0
CC1=C(Cl)C=CC(=C1)N2C(=O)C3=C(NN=C3)N=C2SCC4=C(F)C=CC=C4	1	0	1	0	0	1	0	0	subs/inhib
CCC1=CC=C(C=C1)N2C(=O)C3=C(NN=C3)N=C2SCC4=C(F)C=CC=C4	1	0	1	1	0	1	subs/inhib	0	subs/inhib
COC1=CC=C(NC(=O)CN2C=C(C(=O)C3=CC=CS3)C4=C2C=CC=C4)C=C1		1	1	0	1	1	NA	subs/inhib	subs/inhib
COC1=CC2=C(C=C1)C3=C(CC2)SC(NC(=O)C4=CC(Br)=CC=C4)=N3	1	0	1	1	0	1	subs/inhib	0	subs/inhib
CC1=CC=CC(NC(C2=C(F)C=CC=C2)C3=C(O)C4=NC(C)=CC=C4C=C3)=N1	1	0	1	1	0	0	subs/inhib	0	0
COC1=CC=C(NC(=O)CSC2=NC(=CC(=N2)C(F)(F)F)C3=CC=CS3)C=C1OC	1	1	1	0	0	1	0	0	subs/inhib
COC1=CC=C(C=C1)N2N=C3C(=C2C)C(C)=NN=C3N4CCCC(C4)C(=O)NCC5=CC=C(C)C=C5	1	0	1	0	1	1	0	1	subs/inhib
CC1=C(C(N2N=C(SCC3=CC=CC=C3)N=C2N1)C4=CN=CC=C4)C(=O)NC5=C(C)C=CC=C5	1	0	1	1	0	1	subs/inhib	0	subs/inhib
COC1=CC=C(C=C1)C2=NN3C(C4=CC(OC)=C(OC)C=C4)C(C(=O)NC5=CC=CN=C5)=C(C)NC3=N2	0	0	1	1	0	1	1	0	subs/inhib
CC1=CC(C)=C(NC(=O)CN2C=C(C(=O)C3=CC=CO3)C4=C2C=CC=C4)C=C1	1	1	1	1	1	1	subs/inhib	subs/inhib	subs/inhib
C[C@H](CCC(O)=O)[C@H]1CC[C@H]2[C@@H]3[C@H](O)C[C@@H]4C[C@H](O)CC[C@]4(C)[C@H]3C[C@H](O)[C@]12C	0	0	0				NA	NA	NA
C[C@H](CCC(O)=O)[C@H]1CC[C@H]2[C@@H]3[C@H](O)C[C@@H]4C[C@H](O)CC[C@]4(C)[C@H]3CC[C@]12C	0			0	0	0	0	NA	NA
CC1=C(O)C(C=O)=C(CO)C=N1	0	0		0	0	0	0	0	NA
C[C@H]1O[C@H](C[C@H](O)[C@@H]1O)O[C@H]2[C@@H](O)C[C@H](O[C@H]3[C@@H](O)C[C@H](O[C@H]4CC[C@@]5(C)[C@H](CC[C@@H]6[C@@H]5CC[C@]7(C)[C@H](CC[C@]67O)C8=CC(=O)OC8)C4)O[C@@H]3C)O[C@@H]2C	0	0	0	0	0	0	0	0	0
OC[C@H]1O[C@](O)(CO)[C@@H](O)[C@@H]1O[C@@H]2O[C@H](CO)[C@H](O)[C@H](O)[C@H]2O	0			0	0	0	0	NA	NA
NS(=O)(=O)CC1=NOC2=C1C=CC=C2	0	0	0	0	0	0	0	0	0
CC(=O)OCC(=O)[C@@]1(O)[C@@H](C[C@H]2[C@@H]3CCC4=CC(=O)C=C[C@]4(C)[C@@]3(F)[C@@H](O)C[C@]12C)OC(C)=O	1	1	1	0	0	0	0	0	0
CCCCC(CC)COC(=O)C1=C(O)C=CC=C1	0	0	0	0	0	0	0	0	0
ClC1=CC=C2C(CCC3=C(N=CC=C3)C2=C4CCNCC4)=C1	1	0	1	0	0	1	0	0	subs/inhib
CCC[C@@H]1C[C@H](N(C)C1)C(=O)N[C@H]([C@@H](C)O)[C@H]2O[C@H](SC)[C@H](O)[C@@H](O)[C@H]2O	0	0		0	0	0	0	0	NA
CN1C2=C(N(CC3OCCO3)C=N2)C(=O)N(C)C1=O	0	0	0	0	0	0	0	0	0
CC(C)CCC[C@@H](C)[C@H]1CC[C@@H]2[C@]1(C)CCC\C2=C/C=C3/C[C@@H](O)CCC3=C	0						NA	NA	NA
CC1(C)[C@@H](N2[C@@H](CC2=O)S1(=O)=O)C(O)=O	0	0		0	0	0	0	0	NA
FC(F)(F)[C@]1(OC(=O)NC2=CC=C(Cl)C=C12)C#CC3CC3	0	0	0	0	0	0	0	0	0
NC1=NC(=O)N(C=C1)[C@H]2CS[C@@H](CO)O2	0	0	0	0	0	0	0	0	0
COC1=CC(=CC=C1)[C@@]2(O)CCCC[C@@H]2CN(C)C	0	1	0	0	0	0	0	0	0
CN(C\C=C\C#CC(C)(C)C)CC1=C2C=CC=CC2=CC=C1	1	1	1	0	1	0	0	subs/inhib	0
CC[C@]12CC[C@H]3[C@@H](CCC4=CC(=O)CC[C@H]34)[C@@H]1CC[C@@]2(O)C#C	1	0	1	0	0	0	0	0	0
[O-][N+](=O)C1=CC2=C(NC(=O)CN=C2C3=CC=CC=C3)C=C1	0	0	0	0	0	0	0	0	0
CC(C)C1CCC(C)CC1OC(=O)C2=C(N)C=CC=C2	1		1	1	0	0	subs/inhib	NA	0
CC(=O)OC1=CC=CC(C)=C1			0	0	0	0	NA	NA	0
CC1OC(C)OC(C)O1		0	1	0	0	0	NA	0	0
CC(C)C1=C(O)C=C(C)C=C1		0	0	0	0	0	NA	0	0
NC1=CC=C(N)C=C1	0	0	0	0	1	1	0	1	1
COC(=O)C1=CC=C(O)C=C1	0	0	0	0	0	0	0	0	0
CC(C)(C)C1=CC=C(O)C=C1	0	0	1	0	0	1	0	0	subs/inhib
NNC1=CC=CC=C1	0	0	0	0	0	0	0	0	0
CCCOC(=O)C1=CC=CC=C1	0	0	0	0	0	0	0	0	0
CCCCCCCCCCCCSCCOCCO	1		1	0	0	0	0	NA	0
CC(=O)NC1=CC=C(\C=N\NC(N)=S)C=C1	0	0	0	0	0	0	0	0	0
CC(=O)N[C@@H](CC1=CC=C(O)C=C1)C(O)=O	0		0	0	0	0	0	NA	0
NC(=O)NNC1=CC=CC=C1	0	0	0	0	0	0	0	0	0
COC1=CC(=CC(OC)=C1OC)C(=O)N2CCOCC2	0	0	0	0	0	0	0	0	0
CN1N(C(=O)C(I)=C1C)C2=CC=CC=C2	0	0	1	0	0	0	0	0	0
COC1=C(C=C(C(=O)C2=CC=CC=C2)C(O)=C1)S(O)(=O)=O	0		0	0	0	0	0	NA	0
NC(CO)(CO)CO	1			0	0	0	0	NA	NA
C[C@]1(O)CC[C@H]2[C@@H]3CCC4=CC(=O)C=C[C@]4(C)[C@H]3CC[C@]12C	0	0	1	0	0	0	0	0	0
C[C@]12CC[C@H]3[C@@H](CCC4=CC(=O)CC[C@H]34)[C@@H]1CC[C@@H]2O	0	0	0	0	0	0	0	0	0
CC(=O)OC1=CC=C(C=C1)C2(C(=O)NC3=C2C=CC=C3)C4=CC=C(OC(C)=O)C=C4	1	1	1	1	0	0	subs/inhib	0	0
NNC1=C2C=CC=CC2=C(NN)N=N1			0	0	0	0	NA	NA	0
OC(=O)CCCCCCCCC=C	0		0	0	0	0	0	NA	0
CN1C(O)=NC(=O)C(C)(C1=O)C2=CCCCC2			0	0	0	0	NA	NA	0
CCN(CC)CCOC(=O)C(O)(C1=CC=CC=C1)C2=CC=CC=C2	0	1	1	0	1	0	0	subs/inhib	0
CCCCNC(=O)NS(=O)(=O)C1=CC=C(N)C=C1	1	0	0	0	0	0	0	0	0
OC(=O)C1=CC=CC=C1O			0				NA	NA	NA
COC1=CC=C(\C=C\C(O)=O)C=C1	0	0	0	0	0	0	0	0	0
CCN(CC)CCSC(=O)C(C1=CC=CC=C1)C2=CC=CC=C2	1	1	1	0	1	0	0	subs/inhib	0
CCOC1=CC=C(C=C1)C(=O)OCCN(CC)CC	0	1	1	0	1	0	0	subs/inhib	0
CCOC(=O)C1=C(N)SC2=C1CCN(CC3=CC=CC=C3)C2	1	1	1	1	1	0	subs/inhib	subs/inhib	0
FC1=CC2=C(OCC[C@]23NC(=O)NC3=O)C=C1	0	0	0	0	0	0	0	0	0
CC(N(O)C(N)=O)C1=CC2=C(S1)C=CC=C2	0	0		0	0	0	0	0	NA
COC1=CC2=NC=NC(NC3=CC=C(F)C(Cl)=C3)=C2C=C1OCCCN4CCOCC4	0	1	1	0	1	0	0	subs/inhib	0
CN1CCN(CC2=CC=C(C=C2)C(=O)NC3=CC=C(C)C(NC4=NC=CC(=N4)C5=CC=CN=C5)=C3)CC1	0	0		0	0	0	0	0	NA
CC(C)C1=C(C(=O)NC2=CC=CC=C2)C(=C(N1CC[C@@H](O)C[C@@H](O)CC(O)=O)C3=CC=C(F)C=C3)C4=CC=CC=C4		0		0	0	0	NA	0	NA
COC1=C(C)C2=C(C(=O)OC2)C(O)=C1C\C=C(/C)CCC(=O)OCCN3CCOCC3	0	1	1	0	0	1	0	0	subs/inhib
CC(C)(C)NC(=O)[C@@H]1CN(CC2=CC=CN=C2)CCN1C[C@@H](O)C[C@@H](CC3=CC=CC=C3)C(=O)N[C@@H]4[C@H](O)CC5=CC=CC=C45	1	0	1	0	0	1	0	0	subs/inhib
CC(C)[C@H](NC(=O)N(C)CC1=CSC(=N1)C(C)C)C(=O)N[C@H](C[C@H](O)[C@H](CC2=CC=CC=C2)NC(=O)OCC3=CN=CS3)CC4=CC=CC=C4	1	1	1	1	1	1	subs/inhib	subs/inhib	subs/inhib
CNC(C)CC1=C(OC)C=CC=C1		1	0	0	0	0	NA	0	0
C[C@]12C[C@H](O)[C@H]3[C@@H](C[C@H](F)C4=CC(=O)C=C[C@]34C)[C@@H]1CC[C@]2(O)C(=O)CO	0	0	0	0	0	0	0	0	0
OC1=C(Br)C=C(Br)C=C1C(=O)NC2=CC=C(Br)C=C2	0	0		1	0	1	1	0	NA
OC(=O)CC1=CC=CC=C1	0	0	0	0	0	0	0	0	0
O=C(OC1=CC=CC2=C1N=CC=C2)C3=CC=CC=C3	1	1	1	0	0	0	0	0	0
COC(=O)C1=CN=CC=C1	0		0	0	0	0	0	NA	0
CC(C)=CCOC1=CC=C(\C=C\C(=O)C2=C(OCC(O)=O)C=C(OCC=C(C)C)C=C2)C=C1	1	0	1	0	0	0	0	0	0
OC(=O)CNC(=O)C1=CC=CC=C1	0	0	0	0	0	0	0	0	0
CC(N)C12CC3CC(CC(C3)C1)C2	0	0	0	0	0	0	0	0	0
CC(C)CC1NC(=S)N(CC=C)C1=O	0	0	0	0	1	1	0	1	1
ClC1=C(Cl)C(=CC=C1)N2CCN(CCCCOC3=CC4=C(CCC(=O)N4)C=C3)CC2	0	1	1	0	1	0	0	subs/inhib	0
CN(CC1=CC=C(C=C1)C(C)(C)C)CC2=C3C=CC=CC3=CC=C2	1	1	1	0	1	0	0	subs/inhib	0
CN1CCN(CC1)C(=O)O[C@@H]2N(C(=O)C3=C2N=CC=N3)C4=NC=C(Cl)C=C4	0	0	0	0	0	0	0	0	0
CC(C)N(CC[C@H](C1=CC=CC=C1)C2=CC(C)=CC=C2O)C(C)C	0	1	1	0	1	1	0	subs/inhib	subs/inhib
CC1=C(N2[C@H](SC1)[C@H](NC(=O)[C@H](N)C3=CC=CC=C3)C2=O)C(O)=O	0	0	0	0	0	0	0	0	0
C1CN(CCN1)C2=CC=CC3=C2OCCO3	0	1	0	0	0	0	0	0	0
CC4(CN1CCC(CC1)N2C(=O)NC3=C2C=CC=C3)OCC5=C(C=CC=C5)N6C=CC=C46	1	1	1	1	1	1	subs/inhib	subs/inhib	subs/inhib
CN1C2=C(C=CC=C2)C(=N[C@H](NC(=O)C3=CC4=C(N3)C=CC=C4)C1=O)C5=CC=CC=C5	0	0	1	1	0	0	1	0	0
OP(O)(=O)CN1C(=O)C(=O)NC2=C1C=C(N3CCOCC3)C(=C2)C(F)(F)F	0	0	0	0	0	0	0	0	0
COC(=O)[C@@H]1CC2=CC(=O)CC[C@]2(C)[C@@]34O[C@@H]3C[C@@]5(C)[C@@H](CC[C@@]56CCC(=O)O6)[C@H]14	0	0	0	0	0	0	0	0	0
CN(C)CCC1=CC=C(O)C=C1	0	0	0	0	0	0	0	0	0
COC1=C(O)C=CC(=C1)C(=S)N2CCOCC2	0	0	0	0	0	0	0	0	0
CC(=O)NC(=O)C1=C(O)C=CC=C1	0	0	0	0	0	0	0	0	0
CCCCN1CCCC1C(=O)NC2=C(C)C=C(C)C=C2C	1	1	1	0	1	1	0	subs/inhib	subs/inhib
NC1=CC=C(C=C1)S(=O)(=O)NCC2=CC=CC=C2	0	0	0	0	0	0	0	0	0
SCC(=O)NC1=CC=CC=C1	1	1	1	1	0	0	subs/inhib	0	0
CC=C\C=N\NC(=O)C1=CC=NC=C1	0	0	0	1	0	1	1	0	1
NC1=CC=C(C=C1)C(=O)NC2=C(N)C=CC=C2	0	0	0	0	0	0	0	0	0
C[N+](C)(C)CCOC(=O)C(O)(C1=CC=CC=C1)C2=CC=CC=C2	0	0		0	0	0	0	0	NA
CN1CCN(CC1)C2=NC3=C(SC4=C2C=C(Cl)C=C4)C=CC=C3	1	1	1	0	0	1	0	0	subs/inhib
CN1CCN(CC1)C2=NC3=C(CC4=C2C=CC=C4)C=CC(F)=C3	0	1	1	0	1	0	0	subs/inhib	0
CN(C)CCN1C2=C(C=CC=C2)N(C)C3=C(C=CC=C3)C1=O	0	0	1	0	0	0	0	0	0
COC1=CC=C(C=C1)C(=O)C2=C(C)N(CCN3CCOCC3)C4=C2C=CC=C4	1	1	1	1	0	1	subs/inhib	0	subs/inhib
NC1=NC(=NC(N)=N1)C2=C(Cl)C=CC(Cl)=C2	0	0	0	0	0	0	0	0	0
NC(=N)NC1=CC=C(C=C1)C(=O)OC2=CC3=C(C=C2)C=C(C=C3)C(N)=N	1	0	0	0	0	0	0	0	0
CNC1=C2CCCCC2=NN1C	0	0	0	0	0	0	0	0	0
OC(=O)C(CC1=CC(I)=C(O)C(I)=C1)C2=CC=CC=C2	0	0	0	0	0	0	0	0	0
CCC1=C(C(=O)C2=CC(I)=C(O)C(I)=C2)C3=CC=CC=C3O1	1	0	0	1	0	0	subs/inhib	0	0
CC(CC1=CC=CC=C1)NC=O		0		0	0	0	NA	0	NA
OC1=C2N=CC=CC2=C(C=C1I)S(O)(=O)=O	0	0	0	0	0	0	0	0	0
CN(C)CCOC(=O)C1=CC=C2N(CC3=CC=CC=C3)C(C)=C(C)C2=C1	0	0	1	0	0	0	0	0	0
CC1=NC2=C(C=CC=C2)N1CC3=CC=C(Cl)C=C3	0	0	1	0	1	0	0	1	0
CC1=CC=CC(C)=C1NC(=O)CN2CCCCCC2	0	1	0	0	0	0	0	0	0
COC1=CC2=C(C=C1OC)C3CC(=O)C(CC(C)C)CN3CC2	1	1	1	0	1	0	0	subs/inhib	0
CC(C)(N)CC1=CC=C(Cl)C=C1	0	0	0	0	1	0	0	1	0
CCCCNCC(O)C1=CC=C(O)C=C1	0	0	0	0	1	0	0	1	0
CC(CC1=CC=CC=C1)NCC2=C(Cl)C=CC=C2	1	1	1	0	1	1	0	subs/inhib	subs/inhib
ClC1=CC=C(CN2C=C(C(=O)C(=O)NC3=CC=NC=C3)C4=CC=CC=C24)C=C1	0	0	1	1	0	1	1	0	subs/inhib
O=C(CN1CCNCC1)NC2CCCCC2	0	0	0	0	0	0	0	0	0
COC(=O)C1=C(C)NC(C)=C(C1C2=C(OC(F)F)C=CC=C2)C(=O)OC	0	0	1	1	0	0	1	0	0
NC1=NN=NN1C2=CC=CC=C2	0	0	0	1	0	0	1	0	0
CCN(CC)S(=O)(=O)C1=CC=C(C=C1)C(O)=O	0	0	0	0	0	0	0	0	0
C(CC1=CC=CC=C1)NC2=NC(=CS2)C3=CC=CC=C3	1	1	1	1	1	1	subs/inhib	subs/inhib	subs/inhib
CC1=CC=CC(C)=C1NC(=O)CN2CCCC2	0	1	0	0	0	0	0	0	0
OC(=O)CC1=CN(N=C1C2=CC=C(Cl)C=C2)C3=CC=CC=C3	1	0	1	1	0	0	subs/inhib	0	0
COC1=CC=C(C=CC(=O)C2=C(OC)C=C(OC)C=C2)C=C1	1	1	1	1	0	1	subs/inhib	0	subs/inhib
CC(C)NCC(O)C1=CC=C(C=C1)[N+]([O-])=O	0	0	0	0	0	0	0	0	0
NS(=O)(=O)C1=CC(=C(Cl)C=C1)S(N)(=O)=O	0	0	0	0	0	0	0	0	0
CC(C)C(Br)C(=O)NC(N)=O	0		0	0	0	0	0	NA	0
BrC1=C(Br)C=C(S1)C(=O)NC2=CC=C(Br)C=C2	1	0	1	0	1	1	0	1	subs/inhib
OC(=O)CC1=CSC(=N1)C2=CC=C(Cl)C=C2	0	0	0	0	0	0	0	0	0
CC(=O)NC1=CC=C(CC(O)=O)C=C1	0	0	0	0	0	0	0	0	0
CC(C)CC1=CC=C(CC(O)=O)C=C1	0	0	0	0	0	0	0	0	0
CC1=CC(CC(O)=O)=C(C)N1C2=CC=C(Cl)C=C2			1	0	0	0	NA	NA	0
O=C(NCN1CCOCC1)C2=NC=CN=C2	0		0	0	0	0	0	NA	0
OC(=O)CNC(=O)C1=C(I)C=CC=C1	0		0	0	0	0	0	NA	0
CC(C)(C)C(=O)NCCCC(O)=O	0	0	0	0	0	0	0	0	0
CCNC(=O)NCC1=CC(Cl)=CC=C1	0	0	0	0	0	0	0	0	0
CNCC(=O)C1=CC(O)=C(O)C=C1	0	0	1	0	0	0	0	0	0
OCCN1CCN(CCC(=O)N2C3=C(SC4=C2C=C(C=C4)C(F)(F)F)C=CC=C3)CC1	0	0	1	0	0	0	0	0	0
COC1=C(NS(=O)(=O)C2=CC=C(N)C=C2)N=CC=N1	0	0	0	0	0	0	0	0	0
CN1CCN(CCC(=O)N2C3=C(SC4=C2C=C(C=C4)C(F)(F)F)C=CC=C3)CC1	0	0	1	0	1	1	0	1	subs/inhib
CCN(CC)CCOC1=C(C=CC=C1)C(=O)CCC2=CC=CC=C2	0	1	1	0	1	0	0	subs/inhib	0
NNC(=O)CP(=O)(C1=CC=CC=C1)C2=CC=CC=C2	0	0	0	0	0	1	0	0	1
NC1=NC(NC2=CC=CC=C2)=NC=N1	0	0	1	0	0	0	0	0	0
COC1=CC(=CC(OC)=C1OC)C(=S)N2CCOCC2	0	0	0	0	0	0	0	0	0
O[C@H]1CO[C@@H]2[C@H](O)CO[C@H]12	0	0	0	0	0	0	0	0	0
COC1=C(OC)C(=O)C(CCCCCCCCCCO)=C(C)C1=O	1	1	1	1	1	1	subs/inhib	subs/inhib	subs/inhib
COC1=C(OC)C=C(CC2=C(N)N=C(N)N=C2)C=C1	0	0	0	0	0	0	0	0	0
CC1=[N+]([O-])C=C(N=C1)C(O)=O		0	0	0	0	0	NA	0	0
CCN(C(C)=O)C1=CC(=CC=C1)C2=CC=NC3=C(C=NN23)C#N	0	0	0	0	0	0	0	0	0
CCOC1=CC(N)=C(Cl)C=C1C(=O)NCC2CN(CC3=CC=C(F)C=C3)CCO2	1	1	1	0	0	1	0	0	subs/inhib
ClC1=C(NC2=NCCN2)C3=NSN=C3C=C1	0	1	0	0	0	0	0	0	0
CCC1NC2=CC(Cl)=C(C=C2S(=O)(=O)N1)S(N)(=O)=O	0	0	0	0	0	0	0	0	0
CC1=C(COC(C)(C)C(O)=O)OC(=N1)C2=CC=C(Cl)C=C2	0	0	0	0	0	0	0	0	0
CC1=C(Cl)C(=O)OC2=C1C=CC(OP(=O)(OCCCl)OCCCl)=C2	1	0	0	1	1	0	subs/inhib	1	0
C(CN1CCOCC1)CC2=CC=C(COC3=CC=CC=C3)C=C2	1	1	1	0	1	0	0	subs/inhib	0
O=C(C(C1=CC=CC=C1)C2=CC=CC=C2)C3C(=O)C4=C(C=CC=C4)C3=O	0	0		1	0	0	1	0	NA
OC1=C(Cl)C=C(Cl)C=C1S(=O)C2=C(O)C(Cl)=CC(Cl)=C2		0	1	0	0	1	NA	0	subs/inhib
OC1=C(C=C(C=C1[N+]([O-])=O)[N+]([O-])=O)C(=O)N\N=C\C2=CC=C(O2)[N+]([O-])=O	0	1	1	0	1	1	0	subs/inhib	subs/inhib
CC(=O)NC1=CC=C(OCCOCCOC2=CC=C(NC(C)=O)C=C2)C=C1	0	0	0	1	0	0	1	0	0
CC1=NC2=C(O)C(Br)=CC(Br)=C2C=C1	1	1		0	0	0	0	0	NA
CCCCCCOC(=O)C1=CN=CC=C1	1	1	1	0	0	0	0	0	0
CCN1CCCC1=O	0	0	0	0	0	0	0	0	0
OC(=O)[C@@H]1CCC(=O)N1	0	0	0	0	0	0	0	0	0
CC(C)CCC[C@@H](C)CCC[C@@H](C)CCC[C@]1(C)CCC2=CC(O)=CC(C)=C2O1	0		0	0	0	0	0	NA	0
CCCCC(CC)COC(=O)C=CC1=CC=C(OC)C=C1		0	0	1	0	0	NA	0	0
CCOC1=C(C=CC(NC(C)=O)=C1)C(=O)OC	0	0	0	0	0	0	0	0	0
C[C@@H]1O[C@@H](OC[C@H]2O[C@@H](OC3=C(OC4=CC(O)=CC(O)=C4C3=O)C5=CC=C(O)C(O)=C5)[C@H](O)[C@@H](O)[C@@H]2O)[C@H](O)[C@H](O)[C@H]1O	0	0	0	0	0	0	0	0	0
COP(=S)(OC)OC1=CC=C(C=C1)S(=O)(=O)N(C)C	0	0	1	1	0	0	1	0	0
CC(C)(C)OC(=O)C1=C2[C@@H]3CCCN3C(=O)C4=C(Br)C=CC=C4N2C=N1	0	0	0	1	0	0	1	0	0
CN1C2=C(C=C(Cl)C=C2)C(=NCC1=S)C3=CC=CC=C3	0	0	1	0	0	0	0	0	0
CCC(C(=O)OCCOCCN(CC)CC)C1=CC=CC=C1	0	1	0	0	0	0	0	0	0
ClC1=CC=C(NC(=O)C2CC2)C=C1Cl	0	0	0	0	0	0	0	0	0
OC1=C(\C=N\NC(=O)C2=CC=NC=C2)C=CC=C1	0	1	0	1	0	0	1	0	0
CC1=CC=C(C=C1)S(=O)(=O)NC(=O)NC2CCCCC2	1	0	0	0	0	0	0	0	0
NS(=O)(=O)C1=CC=C(NC(=O)CCC(O)=O)C=C1	0		0	0	0	0	0	NA	0
COC1=CC=C(C=C1)S(=O)(=O)NC2=NN=C(CC(C)C)S2	1	0	0	0	0	0	0	0	0
CCOC(=O)C1=CC=C(O)C=C1	0	0	0	0	0	0	0	0	0
[O-][N+](=O)C1=CN=C(NC(=O)C2=CC=CS2)S1	1	0	0	1	0	1	subs/inhib	0	1
COC1=C(OC)C=C(\C=N\NC(=O)C2=CC=NC=C2)C=C1	0	0	0	0	0	0	0	0	0
COC1=CC2=C(C=C1)N=C(NC(=O)NC3=CC=CC=C3)S2	1	1	0	0	0	1	0	0	1
CC1=C(CN2C=CN=C2)C3=C(C=CC=C3)N1CCC(O)=O	0	0	0	1	0	0	1	0	0
CNC(=N)NC(=O)NC1=C(C)C=CC=C1C		0	0	0	0	0	NA	0	0
COC([C@H](OC1=NC(C)=CC(C)=N1)C(O)=O)(C2=CC=CC=C2)C3=CC=CC=C3	0	0	0	0	0	0	0	0	0
CN1CCC(O)(C(C1)C(=O)C2=CC=C(F)C=C2)C3=CC=C(F)C=C3	1	1	0	0	0	0	0	0	0
OC1=C2N=CC=CC2=C(C=C1)[N+]([O-])=O	0	0	0	0	0	0	0	0	0
O=C(CCN1CCC(C1)C2=CC=CC=C2)C3=CC4=C(OCCO4)C=C3	0	1	0	0	1	0	0	subs/inhib	0
CCC1=NN=C(N[S+]([O-])(=O)C2=CC=C(N)C=C2)S1	0	0	0				NA	NA	NA
NC1=CC=C(C=C1)S(=O)(=O)NC2=CC=CC=C2	0	0	0	0	0	0	0	0	0
CN1CCN(CC1)C(=O)C2CCCCC2	0	0	0	0	0	0	0	0	0
CCOC(=O)C1=C(C)N(C)C2=C1C=C(O)C=C2	0	0	0	0	0	1	0	0	1
CCN(CC)CCOC(=O)C(C)(C1=CC=CC=C1)C2=CC=CC=C2	1	1	1	1	1	1	subs/inhib	subs/inhib	subs/inhib
OC(C#CCN1CCCC1)(C2=CC=CC=C2)C3=CC=CC=C3	1	1	1	1	0	1	subs/inhib	0	subs/inhib
O=C(CN1CCN(CC2=CC3=C(OCO3)C=C2)CC1)N4C5=C(SC6=C4C=CC=C6)C=CC=C5	1	1	1	1	1	1	subs/inhib	subs/inhib	subs/inhib
[O-][N+](=O)C1=CC(=CC=C1)S(=O)(=O)NCCNS(=O)(=O)C2=CC=CC(=C2)[N+]([O-])=O		0	1	1	0	1	NA	0	subs/inhib
CCCOC(=O)C1=CC=C(N)C=C1	0	0	0	0	0	0	0	0	0
CC(C)COC(=O)C1=CC=C(N)C=C1	0	0	0	0	0	0	0	0	0
CC1=CC=CC(C)=C1NC(=O)C2=C(C=CC=C2)C(O)=O	0	0	0	0	0	0	0	0	0
CCN1CCC[C@H]1CNC(=O)C2=C(OC)C(Cl)=CC(CC)=C2O	1	1	1	0	1	0	0	subs/inhib	0
CN1C=C(\C=C2/C(=O)NC3=CC=CN=C23)C4=C1C=CC=C4	0	0	1	0	0	1	0	0	subs/inhib
COC1=CC2=C(C=C1OC)C(=NCC2)C(C(=O)N(CCC3=C(OC)C(OC)=C(OC)C=C3)CCC4=C(OC)C(OC)=C(OC)C=C4)C5=CC=CC=C5	1	1	1	1	0	1	subs/inhib	0	subs/inhib
COC(=O)C(CN)C1=CNC2=CC=C(OC)C=C12	0	0	0	0	1	0	0	1	0
CCC1=C(O)C=C(O)C(=C1)C2=NNC(C)=C2C3=CC4=C(OCCO4)C=C3	1	0	0	1	1	1	subs/inhib	1	1
CN1[C@H]2CC[C@@H]1CC(C2)OC(=O)C3=CNC4=C3C=CC=C4	0	1	0	0	0	0	0	0	0
CCC1=CC=C(OCC2=C(C=CC=C2)C(=O)NC3=CC4=C(C=C3)N=C(C)C=C4N)C=C1	0	1	1	0	1	0	0	subs/inhib	0
COC1=CC(NCC2=C(C)C3=C(C=C2)N=C(N)N=C3N)=CC(OC)=C1OC	0		1	0	1	1	0	NA	subs/inhib
COCC(=O)O[C@]3(CCN(C)CCCC1=NC2=C(N1)C=CC=C2)CCC4=C(C=CC(F)=C4)[C@@H]3C(C)C	0	1	1	0	1	1	0	subs/inhib	subs/inhib
CN1CCC(CC1)NC2=NC=C3N=CN=C(NC4=CC(Cl)=C(F)C=C4)C3=N2	0	0	0	0	0	0	0	0	0
CC1=C(O)C(C)=C2CCC(C)(COC3=CC=C(CC4SC(=O)NC4=O)C=C3)OC2=C1C	1	0	1	1	0	1	subs/inhib	0	subs/inhib
CSC1=CC=C(\C=C2\C(C)=C(CC(O)=O)C3=C2C=CC(F)=C3)C=C1	0	0	1	0	0	0	0	0	0
C[C@@H]1[C@H]2[C@H](O)[C@H]3[C@H](N(C)C)C(O)=C(C(N)=O)C(=O)[C@@]3(O)C(O)=C2C(=O)C4=C1C=CC=C4O	0	0	0	0	0	0	0	0	0
COC1=C2OC3=CC=C(C[C@@H]4N(C)CCC5=C4C(OC6=C(OC)C=C7CCN(C)[C@H](CC(C=C1)=C2)C7=C6)=C8OCOC8=C5)C=C3	0	0	1	0	0	1	0	0	subs/inhib
C[C@@H]1CC[C@H]2[C@@H](C)C(=O)O[C@@H]3O[C@@]4(C)CC[C@@H]1C23OO4	0	0	0	0	0	0	0	0	0
CC(C)C[C@H](NC(=O)[C@H](C)NC(=O)C[C@H](O)[C@H](CC(C)C)NC(=O)[C@@H](NC(=O)[C@@H](NC(=O)CC(C)C)C(C)C)C(C)C)[C@@H](O)CC(O)=O	0	0	0	0	0	0	0	0	0
CC1=CC(C)=C(C(C)=C1)[S+]([O-])(=O)NC2=CC=CC3=C2N=CC=C3	1	0	1	0	0	1	0	0	subs/inhib
O[C@H]([C@H]1CCCCN1)C2=C3C=CC=C(C3=NC(=C2)C(F)(F)F)C(F)(F)F			1	0	1	0	NA	NA	0
CN(C)CCCO[C@H]1[C@H](O[C@@H]2OC(C)(C)O[C@H]12)[C@H](O)CO	0	0	0				NA	NA	NA
OCCN1CCN(CCCN2C3=C(C=CC=C3)C=CC4=C2C=CC=C4)CC1	1	1	1	0	0	0	0	0	0
[O-][S+](=O)(NCCNC\C=C\C1=CC=C(Br)C=C1)C2=CC=CC3=CN=CC=C23	1	0	1	1	1	1	subs/inhib	1	subs/inhib
CC(N)C(=O)NC1=C(C)C=CC=C1C	1	0	1	0	0	0	0	0	0
COC(=O)[C@@H](N)CC1=CC(O)=C(O)C=C1	0		0	0	0	1	0	NA	1
CN(C)[C@H]1[C@@H]2C[C@@H]3[C@H](O)C4=C(Cl)C=CC(O)=C4C(=O)C3=C(O)[C@]2(O)C(=O)C(C(N)=O)=C1O	0	0	0	0	0	0	0	0	0
COCCOC(=O)C1=C(C)NC(C)=C(C1C2=CC(=CC=C2)[N+]([O-])=O)C(=O)OC\C=C\C3=CC=CC=C3	0	0	1	1	1	1	1	1	subs/inhib
OCCN1CCN(CC\C=C2/C3=CC(=CC=C3SC4=C2C=CC=C4)C(F)(F)F)CC1	0	1	1	0	1	1	0	subs/inhib	subs/inhib
CCC1=C(C)NC2=C1C(=O)C(CN3CCOCC3)CC2	0	1	0	0	1	1	0	subs/inhib	1
OC1=CC2=C(C[C@@H]3[C@@H]4CCCC[C@]24CCN3CC=C)C=C1	0	0	0	0	1	0	0	1	0
CCCN1CCC[C@@H]2CC3=C(C[C@@H]12)C=NC(N)=N3	0	0	1	0	1	0	0	1	0
CC1=C(C=C(C#N)C(=O)N1)C2=CN3C=CN=C3C=C2	1	0	1	0	0	0	0	0	0
ClC1=CC=C(C=C1)C2=C(\C=N\OCC3=CC=C(Cl)C(Cl)=C3)N4C=CSC4=N2	1	0	1	1	0	1	subs/inhib	0	subs/inhib
N[C@@H](CC1=CC(I)=C(O)C(I)=C1)C(O)=O	0	0	1	0	0	0	0	0	0
CC(=O)[C@H]1CC[C@H]2[C@@H]3CC=C4C[C@@H](O)CC[C@]4(C)[C@H]3CC[C@]12C	1		1	0	0	1	0	NA	subs/inhib
COC1=C(C)C(C)=C(\C=C\C(C)=C\C=C\C(C)=C\C(O)=O)C(C)=C1	1	0	1	0	0	0	0	0	0
CCC1=CN=C(CCOC2=CC=C(CC3SC(=O)NC3=O)C=C2)C=C1	1	0	0	0	0	0	0	0	0
CC(C)(C)NCC(O)C1=CC(Cl)=C(N)C(Cl)=C1	0	1	0	0	0	0	0	0	0
CN1CCCCC1CCN2C3=CC(=CC=C3SC4=C2C=CC=C4)S(C)=O	0	1	0	0	1	0	0	subs/inhib	0
NC1=NC2=C(CCN(CC=C)CC2)S1	0	0		0	0	0	0	0	NA
CN(C)S(=O)(=O)N[C@H]1C[C@H]2[C@@H](CC3=CN(C)C4=CC=CC2=C34)N(C)C1	0	1	0	0	1	0	0	subs/inhib	0
CN1CCC(CC1)=C2C3=C(CCC4=C2C=CC=C4)SC=C3	0	1	1	0	1	0	0	subs/inhib	0
CN([C@H]1CC[C@@]2(CCCO2)C[C@@H]1N3CCCC3)C(=O)CC4=CC=CC=C4	0	1	0	0	1	0	0	subs/inhib	0
CC(O)CCCCN1C(=O)N(C)C2=C(N(C)C=N2)C1=O	0	0	0	0	0	0	0	0	0
NC1=NC=NC2=C1N=CN2[C@@H]3O[C@H](COP(O)(O)=O)[C@@H](O)[C@H]3O	0	0	0	0	0	0	0	0	0
COC(=O)[C@@H](N1CCC2=C(C1)C=CS2)C3=C(Cl)C=CC=C3	1	1	1	1	0	0	subs/inhib	0	0
O=C1C2=C(N\C1=C3\NC4=C(C=CC=C4)C3=O)C=CC=C2	1		0	0	0	0	0	NA	0
C\C1=C/CC[C@@]2(C)O[C@@H]2[C@H]3OC(=O)C(=C)[C@@H]3CC1	0	1	1	0	0	0	0	0	0
CO[C@]12[C@H]3N[C@H]3CN1C4=C([C@H]2COC(N)=O)C(=O)C(N)=C(C)C4=O		0	0	0	0	1	NA	0	1
CCCCCCCCOC1=C(C=CC=C1)C(=O)NC2=CC=C(C=C2)C(=O)OCC[N+](C)(CC)CC		1		1	0	1	NA	0	NA
C[C@H]([C@H](O)CCC(C)(C)O)[C@H]1CC[C@@]2(O)C3=CC(=O)[C@@H]4C[C@@H](O)[C@@H](O)C[C@]4(C)[C@H]3CC[C@]12C	0						NA	NA	NA
C[C@H]1COC2=C1C(=O)C(=O)C3=C2C=CC4=C3CCCC4(C)C	1			0	0	1	0	NA	NA
CSCC[C@@H](NC(=O)[C@@H](CC1=CC=CC=C1)NC(=O)CNC(=O)CNC(=O)[C@@H](N)CC2=CC=C(O)C=C2)C(O)=O	1	1	1	0	0	0	0	0	0
NCCNC1=C2C=CC=CC2=CC=C1	0	1	0	0	1	0	0	subs/inhib	0
[O-][N+](=O)\N=C1/NCCN1CC2=CN=C(Cl)C=C2	0	0	0	0	0	0	0	0	0
COCC(=O)N(C(C)C(=O)OC)C1=C(C)C=CC=C1C	0	0	1	0	0	0	0	0	0
ClC1=CC(Cl)=C(C=C1)C(CN2C=CN=C2)OCC=C	0	1	1	1	1	1	1	subs/inhib	subs/inhib
CC(C)=C[C@@H]1[C@@H](C(=O)OCC2=COC(CC3=CC=CC=C3)=C2)C1(C)C	1	1		1	0	1	subs/inhib	0	NA
OCCOCCOCCO	0	0	0	0	0	0	0	0	0
NC1=NC(NC2CC2)=NC(N)=N1	0	0	0	0	0	0	0	0	0
COP(=S)(OC)OC1=CC(Cl)=C(Cl)C=C1Cl	1		1	1	0	0	subs/inhib	NA	0
COP(=S)(OC)OC1=CC=C(SC2=CC=C(OP(=S)(OC)OC)C=C2)C=C1	1	0	1	0	0	1	0	0	subs/inhib
COCC(C)N(C(=O)CCl)C1=C(C)SC=C1C	0	0	1	0	0	0	0	0	0
OC(CC(C1=CC=CC=C1)C2=C(O)C3=C(OC2=O)C=CC=C3)C4=CC=C(C=C4)C5=CC=C(Br)C=C5	1	0	0	1	0	1	subs/inhib	0	1
ClC1=CC=C(NC(=O)NC2=CC(Cl)=C(Cl)C=C2)C=C1	0		0	1	0	0	1	NA	0
OCC(Br)(CO)[N+]([O-])=O	1		0	1	0	0	subs/inhib	NA	0
CC(C)(C)CC(C)(C)C1=CC=C(O)C=C1	0		0	0	0	0	0	NA	0
OC1=CC=C(C=C1)C(=O)OCC2=CC=CC=C2	0	0	0	0	0	0	0	0	0
CCCCCCCCOC1=CC(O)=C(C=C1)C(=O)C2=CC=CC=C2	1	0	1	0	0	0	0	0	0
CCCOC(=O)C1=CC(O)=C(O)C(O)=C1	0	0	1	0	0	1	0	0	subs/inhib
OC[C@@H](O)[C@@H](O)[C@H](O)[C@H](O)CO	0	0	0	0	0	0	0	0	0
CC1=[N+]([O-])C2=C(C=CC=C2)[N+]([O-])=C1C(=O)NCCO	0	1	0	0	0	0	0	0	0
CCCCCCCC\C=C/CCCCCCCCN		1	0	0	1	0	NA	subs/inhib	0
CC(O)CN(CCN(CC(C)O)CC(C)O)CC(C)O	0	0	0	0	0	0	0	0	0
CCCCCCCCCCCCCCCC(O)=O	0		0	0	0	0	0	NA	0
CCN(CC)CCOC1=CC=C(C=C1)C(=C(Cl)C2=CC=CC=C2)C3=CC=CC=C3	1	1	1	0	1	0	0	subs/inhib	0
COC1=CC=C(C=C1)C(=O)N2CCN(CC(=O)N3CCOCC3)CC2	0	0	0	0	0	0	0	0	0
CN(C)CCOC(=O)C1=CC=C2N(CCN(C)C)C(C)=C(C)C2=C1	0	0	0	0	0	0	0	0	0
COC1=CC(C=C2CCCC(=CC3=CC(OC)=C(O)C=C3)C2=O)=CC=C1O	1	1	1	0	0	0	0	0	0
NC1=NC(N)=C(S1)C2=CC=CC=C2	0	0	0	0	0	0	0	0	0
CC1=CC=CC(C)=C1NC(=O)CN(CC(O)=O)CC(O)=O	0	0	0	0	0	0	0	0	0
CC1=NC(C)=NC(NS(=O)(=O)C2=CC=C(N)C=C2)=C1	0	0	0	0	0	0	0	0	0
CC(=O)NC1=NC=C(S1)[N+]([O-])=O	0		0	0	0	0	0	NA	0
NC(=S)N\N=C\C1=CN=CC=C1	0	0	0	0	0	1	0	0	1
CC1=CC=C(C=C1)S(=O)(=O)NC(=O)NC2CCCCCCC2	1	0	0	0	0	0	0	0	0
CC1=CC=C(C=C1)S(=O)(=O)NC(=O)NC2CCCC2	1	0	0	0	0	0	0	0	0
CC(=O)N\N=C\C1=CC=C(O1)[N+]([O-])=O	0	1	0	0	0	1	0	0	1
NC(=O)C(=O)N\N=C\C1=CC=C(O1)[N+]([O-])=O	0	1	1	0	1	1	0	subs/inhib	subs/inhib
CCCCCCCCCCCCCCNCCO	0	1	0	0	1	0	0	subs/inhib	0
CC1=C2C=CC=NC2=C(O)C=C1	1	0	1	0	0	0	0	0	0
OCCNC(=O)\C=C\C1=CC=CC=C1	0		0	1	0	1	1	NA	1
COC1=C(OC(=O)OC2=C(OC)C=CC=C2)C=CC=C1	1	1	1	0	0	0	0	0	0
OC(=O)C1=C(O)C=C(NC(=O)C2=CC=CC=C2)C=C1	0	0	0	0	0	0	0	0	0
ClC1=CC=C(C=C1)C(=O)NCCCN2CCOCC2	0	1	0	0	1	0	0	subs/inhib	0
CN1C(=O)\C(=N/NC(N)=S)C2=CC=CC=C12	0	0	0	1	1	1	1	1	1
CCN(CC)CCNC(C(=O)OCCC(C)C)C1=CC=CC=C1	1	1	0	0	1	1	0	subs/inhib	1
CCCCCCCCCCCC(=O)OCC(O)CO		1		0	0	0	NA	0	NA
CCCCCCCCCCCCCCCCCC(=O)OCC(O)CO	1			0	0	0	0	NA	NA
CCNC(=O)\C=C\C1=CC(Br)=CC=C1	0	0	0	0	0	0	0	0	0
CCC(=O)NC1=CC=C(O)C=C1	0	0	0	0	0	0	0	0	0
CCCCNC(=N)NC(N)=N	0	0	0	0	0	0	0	0	0
OC1=CC=C(C=C1)S(O)(=O)=O	1	0	0	0	0	0	0	0	0
CC1NCCOC1C2=CC=CC=C2	0	0	1	0	0	0	0	0	0
CCN(CC)CCNC(=O)COC1=CC=C(Cl)C=C1	0	1	0	0	0	0	0	0	0
NC(=O)NS(=O)(=O)C1=CC=C(N)C=C1	0	0	0	0	0	0	0	0	0
CC(C)(C)NCC(O)COC1=CC=C(NC(=O)NC2CCCCC2)C=C1	0	0	0	0	0	0	0	0	0
COC1=C(OC)C(OC)=C(CN2CCN(CC2)C(C3=CC=C(F)C=C3)C4=CC=C(F)C=C4)C=C1	1	1	1	0	1	0	0	subs/inhib	0
ClC1=C(C=CC=C1)C2CS\C(S2)=C(/C#N)N3C=CN=C3	1	1	0	1	1	1	subs/inhib	subs/inhib	1
C[C@@H](O)[C@@H]1[C@H]2SC([C@H]3CCCO3)=C(N2C1=O)C(O)=O		1		0	0	0	NA	0	NA
COC1=C(CC2=CN(C)C3=C2C=C(NC(=O)OC4CCCC4)C=C3)C=CC(=C1)C(=O)NS(=O)(=O)C5=C(C)C=CC=C5	1	0	1	0	0	1	0	0	subs/inhib
CN(CCOC1=CC=C(NS(C)(=O)=O)C=C1)CCC2=CC=C(NS(C)(=O)=O)C=C2	0	0	0	0	0	0	0	0	0
CCN(CC)C(=O)C(\C#N)=C\C1=CC(O)=C(O)C(=C1)[N+]([O-])=O	1	0	0	1	0	1	subs/inhib	0	1
CN(C)CCOC(=O)C(OCC#C)(C1=CC=CC=C1)C2=CC=CC=C2	1	1	1	1	1	1	subs/inhib	subs/inhib	subs/inhib
CNCC[C@H](OC1=CC=CC2=C1C=CC=C2)C3=CC=CS3	0	1		0	1	1	0	subs/inhib	NA
NC1=NC2=C(N=CN2[C@@H]3C[C@H](CO)C=C3)C(NC4CC4)=N1	0	0	0	0	0	0	0	0	0
CC(=O)N[C@@H]1[C@@H](NC(N)=N)C=C(O[C@H]1[C@H](O)[C@H](O)CO)C(O)=O	0	0		0	0	0	0	0	NA
NC1=NC2=C(N=CN2[C@H]3C[C@H](O)[C@@H](CO)C3=C)C(=O)N1	0	0	0	0	0	0	0	0	0
O=C1[C@H]2CCCC[C@H]2C(=O)N1CCCCN3CCN(CC3)C4=NSC5=C4C=CC=C5	1	1	1	0	0	0	0	0	0
CC(C)(O)C1=C(CC[C@@H](SCC2(CC([O-])=O)CC2)C3=CC(\C=C\C4=NC5=C(C=CC(Cl)=C5)C=C4)=CC=C3)C=CC=C1		1		0	0	0	NA	0	NA
CCCCCOC(=O)NC1=NC(=O)N(C=C1F)[C@@H]2O[C@H](C)[C@@H](O)[C@H]2O	0	0	0	0	0	0	0	0	0
CC1=C(N(N=C1C(=O)NN2CCCCC2)C3=C(Cl)C=C(Cl)C=C3)C4=CC=C(Cl)C=C4	1	0		0	0	0	0	0	NA
CCN(CC)CCN1C2=C(C=C(Cl)C=C2)C(=NCC1=O)C3=C(F)C=CC=C3	0	1	1	0	0	1	0	0	subs/inhib
COCCOC1=CC2=NC=NC(NC3=CC(=CC=C3)C#C)=C2C=C1OCCOC	0	0	0	0	0	1	0	0	1
CC(C)[C@H](N1CCCNC1=O)C(=O)N[C@H](C[C@H](O)[C@H](CC2=CC=CC=C2)NC(=O)COC3=C(C)C=CC=C3C)CC4=CC=CC=C4	0	1	1	0	0	1	0	0	subs/inhib
CN1C2=C(C=C(C=C2)[N+]([O-])=O)C(=NCC1=O)C3=CC=CC=C3	0	0	0	0	0	0	0	0	0
CC1=CC=C(C=N1)C2=C(C=C(Cl)C=N2)C3=CC=C(C=C3)S(C)(=O)=O	0	0	0	0	0	0	0	0	0
CC(C)=CCC1C(=O)N(N(C1=O)C2=CC=CC=C2)C3=CC=CC=C3	0	0	0	0	0	0	0	0	0
CC1(C)S[C@@H]2[C@H](\N=C\N3CCCCCC3)C(=O)N2[C@H]1C(O)=O	0	0	0	0	0	0	0	0	0
NC[C@H]1CC[C@@H](CC1)C(=O)OC2=CC=C(CCC(O)=O)C=C2	0	0	0	0	0	0	0	0	0
COC(=O)C1=C(C=CC=C1)C(=O)C2=CC=C(OCCN3CCCCC3)C=C2	0	1	0	0	0	0	0	0	0
CC(C)OC(=O)C(C(=O)OC(C)C)=C1SC=CS1	1	1		0	0	0	0	0	NA
C[C@]12CC[C@H]3[C@@H]([C@H]4C[C@H]4C5=CC(=O)CC[C@]35C)[C@@H]1[C@@H]6C[C@@H]6[C@@]27CCC(=O)O7	0	0	1	0	0	0	0	0	0
CO[C@H]1O[C@@H]2O[C@@]3(C)CC[C@H]4[C@H](C)CC[C@@H]([C@H]1C)[C@@]24OO3	0		0				NA	NA	NA
C[C@H](N[C@@H](CCC1=CC=CC=C1)C(O)=O)C(=O)N2CCC[C@H]2C(O)=O	0	0	0				NA	NA	NA
CCOC(=O)O[C@@]1(CC[C@H]2[C@@H]3CCC4=CC(=O)C=C[C@]4(C)[C@H]3[C@@H](O)C[C@]12C)C(=O)OCCl	1	0	1	0	0	0	0	0	0
OCC(CO)N[C@H]1C[C@](O)(CO)[C@@H](O)[C@H](O)[C@H]1O	1			0	0	0	0	NA	NA
CCCN1CCCC[C@H]1C(=O)NC2=C(C)C=CC=C2C	0	0	1	0	1	0	0	1	0
COC1=NC(=CC=C1)N(C)C(=S)OC2=CC=C3CCCCC3=C2	1	1	1	0	0	1	0	0	subs/inhib
CC(CCC1=CC=C(O)C=C1)NCC(O)C2=CC=C(O)C=C2	0	1	0	0	1	0	0	subs/inhib	0
CC(C)(C)C1=CC=C(C=C1)C(=O)CCCN2CCC(CC2)OC(C3=CC=CC=C3)C4=CC=CC=C4	1	0	1	0	0	0	0	0	0
CC(C)N1C(\C=C\[C@H](O)C[C@H](O)CC(O)=O)=C(C2=C1C=CC=C2)C3=CC=C(F)C=C3	1	0	0				NA	NA	NA
CCOC(=O)OC(C)OC1=C(N(C)S(=O)(=O)C2=C1C=CC=C2)C(=O)NC3=NC=CC=C3	0	1	1	0	0	0	0	0	0
COC1=CC(=CC(OC)=C1OC)C(=O)N2CCCCCCC2	0	0	1	0	0	1	0	0	subs/inhib
CC(C)C1=C(C)N(C)N(C1=O)C2=CC=CC=C2	0	0	0	0	0	0	0	0	0
CC1SC2=C(C(O)=O)C(=O)C3=CC(F)=C(C=C3N12)N4CCN(CC5=C(C)OC(=O)O5)CC4	0	0	0	0	0	0	0	0	0
COC1=CC=C(C=C1C23CC4CC(CC(C4)C2)C3)C5=CC=C6C=C(C=CC6=C5)C(O)=O	0		0	0	0	0	0	NA	0
CC(C)(C#N)C1=CC(=CC(CN2C=NC=N2)=C1)C(C)(C)C#N	0	0	0	1	0	1	1	0	1
CC1CCC2=C3N1C=C(C(O)=O)C(=O)C3=CC(F)=C2N4CCC(O)CC4	0	0	0	0	0	0	0	0	0
C[N+]3(CCC(C(N)=O)(C1=CC=CC=C1)C2=CC=CC=C2)CCCCC3	0	0	0	0	0	0	0	0	0
C[C@@H](C1=C(F)C=NC=N1)[C@](O)(CN2C=NC=N2)C3=C(F)C=C(F)C=C3	0	0		1	0	0	1	0	NA
CC(C)(C)C(=O)OCOP(=O)(COCCN1C=NC2=C1N=CN=C2N)OCOC(=O)C(C)(C)C	0	1	1	0	0	1	0	0	subs/inhib
COCC1=C(N=C(C(C)C)C(\C=C\[C@@H](O)C[C@@H](O)CC([O-])=O)=C1C2=CC=C(F)C=C2)C(C)C		0		0	0	0	NA	0	NA
CC1=C(SC=C1)C(=CCCN2CCC[C@H](C2)C(O)=O)C3=C(C)C=CS3	0	0	0	0	0	0	0	0	0
CCN(CC)CCNC(=O)C1=C(C)NC(\C=C2/C(=O)NC3=CC=C(F)C=C23)=C1C	0	0	1				NA	NA	NA
C[C@@H]1CC2=C(CCC(=O)C2)[C@H]3CC[C@@]4(C)[C@@H](CC[C@@]4(O)C#C)[C@H]13	0	0	1	0	0	0	0	0	0
OC(=O)CCNC(=O)C1=CC=C(C=C1)\N=N\C2=CC(C(O)=O)=C(O)C=C2	0	0	0	0	0	0	0	0	0
CN1C(=O)C=C(NCCN(CCO)CCCC2=CC=C(C=C2)[N+]([O-])=O)N(C)C1=O	0	0	1	0	0	0	0	0	0
C[C@]12CC[C@H]3[C@H]([C@@H]1CC[C@@H]2O)[C@H](CCCCCCCCCS(=O)CCCC(F)(F)C(F)(F)F)CC4=C3C=CC(O)=C4		0	1	1	0	1	NA	0	subs/inhib
CC1=NN2C(NC(=CC2=O)C3=CC=C(Cl)C=C3)=C1C4=CC=CC=C4	0	0	0	0	0	0	0	0	0
CC1=NN2C(NC(=CC2=O)C3=C(Cl)C=CC=C3)=C1C4=CC=CC=C4	0	0	0	0	0	1	0	0	1
CC1=NN2C(NC(C)=C(CC3=CC=C(C)C=C3)C2=O)=C1C4=CC=CC=C4	0	1	1	0	0	1	0	0	subs/inhib
CC1=NN2C(NC(C)=C(CC3=CC=C(Br)C=C3)C2=O)=C1C4=CC=CC=C4	0	0	1	0	0	0	0	0	0
CC1=NN2C(NC(C)=C(CC3=CC(C)=CC=C3)C2=O)=C1C4=CC=CC=C4	0	1	1	0	0	1	0	0	subs/inhib
CC1=NN2C(NC(C)=C(CC3=C(C)C=CC=C3)C2=O)=C1C4=CC=CC=C4	0	0	1	0	0	1	0	0	subs/inhib
NC(=O)C1=C(N)N(C=N1)[C@@H]2O[C@H](CO)[C@@H](O)[C@H]2O		0		0	0	0	NA	0	NA
CCOC(=O)[C@H](CCC1=CC=CC=C1)N[C@H]2CCC3=C(C=CC=C3)N(CC(O)=O)C2=O	0	0	0	1	0	1	1	0	1
CC(=O)OC1=CC=C(C=C1)C(=C2CCCCC2)C3=CC=C(OC(C)=O)C=C3	0	0	0	1	0	1	1	0	1
CCOC(=O)COC1=C(Cl)C2=C(C=C1)C(C)=C(CCN(CC)CC)C(=O)O2	0	0	0	0	0	0	0	0	0
OC(=O)CC1=CC=C(CCNS(=O)(=O)C2=CC=C(Cl)C=C2)C=C1	0	0	0	0	0	0	0	0	0
NC1=NCC2N1C3=C(CC4=C2C=CC=C4)C=CC=C3	0	0	0	0	1	0	0	1	0
O=C(NC1CCN(CCC2=CNC3=C2C=CC=C3)CC1)C4=CC=CC=C4	0	1	0	0	1	0	0	subs/inhib	0
CC(OC(=O)NC1=C(ON=C1C)C2=CC=C(CSCCC(O)=O)C=C2)C3=C(Cl)C=CC=C3	0	0	1	0	0	1	0	0	subs/inhib
CCN(CC)C(=O)[C@@]1(C[C@@H]1CN)C2=CC=CC=C2	0	0	0	0	0	0	0	0	0
NC1=NC(N)=C(N=O)C(OCC2CCCCC2)=N1		0		0	0	0	NA	0	NA
CCC1=NN(CCCN2CCN(CC2)C3=CC=CC(Cl)=C3)C(=O)N1CCOC4=CC=CC=C4	1	1	1	0	1	1	0	subs/inhib	subs/inhib
NC(=O)C1(CCN(CCCC(=O)C2=CC=C(F)C=C2)CC1)N3CCCCC3	0	0	0	0	1	0	0	1	0
OC1(CCN(CCCC(C2=CC=C(F)C=C2)C3=CC=C(F)C=C3)CC1)C4=CC(=C(Cl)C=C4)C(F)(F)F	0	0	0	0	1	0	0	1	0
COC1=CC=CC2=C1CCCC2CCCN3CCN(CC3)C4CCCCC4	1	1	1	0	1	0	0	subs/inhib	0
NC(=O)C1=CN(CC2=C(F)C=CC=C2F)N=N1	0	0	0	0	0	0	0	0	0
CCN(CC)CCOC1=CC=C(C=C1)C(O)(CC2=CC=C(Cl)C=C2)C3=CC=C(C)C=C3	0	1	1	0	1	0	0	subs/inhib	0
NC(=O)C1=CC(=CC=C1)C2=CC(OC(=O)NC3CCCCC3)=CC=C2	1	0	0	0	0	0	0	0	0
CC[C@]1(NC(=O)N(C)C1=O)C2=CC=CC=C2	0	0	0	0	0	0	0	0	0
CCOC(=O)C1=C(COCCN)NC(C)=C(C1C2=C(Cl)C=CC=C2)C(=O)OC	0	0	0	1	0	1	1	0	1
CCC1=C2OC(=CC2=CC=C1)C(O)CNC(C)(C)C		1	0				NA	NA	NA
OCCCC1=CC=CC=C1			1	0	0	0	NA	NA	0
OC(=O)C1=NC=CC=C1			0	0	0	0	NA	NA	0
NC(=N)N1C=CC=N1			0	0	0	0	NA	NA	0
OS(=O)(=O)NC1CCCCC1	0	0	0	0	0	0	0	0	0
CC(=O)N(CC(O)CO)C1=C(I)C(C(=O)NCC(O)CO)=C(I)C(C(=O)NCC(O)CO)=C1I	0	0		0	0	0	0	0	NA
CCOC(=O)C1=CC(N)=CC=C1	0	0	1	0	0	0	0	0	0
O[C@@H](C(O)=O)C1=CC=CC=C1	0		0	0	0	0	0	NA	0
CCCCCCCCCCCCCCCCN	0	0	0	0	0	0	0	0	0
CCN(CC)C(=O)C1=CC=CN=C1		0		0	0	0	NA	0	NA
COC1=CC(O)=CC(O)=C1	0	0	0	0	0	0	0	0	0
CNCC1=CC=CC=C1	0	0	0	0	0	0	0	0	0
CCOC(=O)C1=CN=CC=C1	0	0	0	0	0	0	0	0	0
CCOC(=O)[C@@H](N)CS	0	0	0	0	0	0	0	0	0
CCCCCCCCCCOCC(O)CN	1	1	0	0	1	0	0	subs/inhib	0
OCC1=NC=CC=C1	0	0	0	0	0	0	0	0	0
CC1=C(C=CC=C1)\N=N\C2=CC(C)=C(C=C2)\N=N\C3=C(O)C=CC4=CC=CC=C34	0	0		0	0	0	0	0	NA
CC(C)CCCC(C)N	0	0	0	0	0	0	0	0	0
OC\C=C\C1=CC=CC=C1	0	0	0	0	0	0	0	0	0
NC(=O)CCCCC1CCSS1			0	0	0	0	NA	NA	0
O=C(OCC1=CC=CC=C1)C2=CN=CC=C2	0	0	1	0	0	0	0	0	0
OC(=O)C1=CC=C[N+]([O-])=C1	0	0	1	0	0	0	0	0	0
O=C1C(=C1C2=CC=CC=C2)C3=CC=CC=C3	0	1	0	0	0	1	0	0	1
[O-]C(=O)C1=C(C=CC=C1)C2=C3C=C(Br)C(=O)C(Br)=C3OC4=C2C=C(Br)C([O-])=C4Br							NA	NA	NA
NCC1=CN=CC=C1	0	0	1	0	0	0	0	0	0
CCOC1=CC=C(NC(=O)CC(C)O)C=C1	0	0	0	0	0	0	0	0	0
CC1=C(O)C(CO)=C(CSSCC2=C(CO)C(O)=C(C)N=C2)C=N1	0	0	0	1	1	0	1	1	0
CN(C)CCOC(C1=CC=C(Cl)C=C1)C2=NC=CC=C2	0	1	0	0	0	0	0	0	0
O=C(NC1=CC=CC=C1)OCC(CN2CCCCC2)OC(=O)NC3=CC=CC=C3	0	1	1	0	1	1	0	subs/inhib	subs/inhib
CCCCCCCC(=O)OCC(O)CO			1	0	0	0	NA	NA	0
CCN(CC1=CN=C(Cl)C=C1)C(\NC)=C\[N+]([O-])=O	0	0	0	0	0	0	0	0	0
CC(C)(C)C(=O)C(OC1=CC=C(Cl)C=C1)N2C=CN=C2			0	1	0	1	NA	NA	1
CCOP(=S)(OCC)O\N=C(/C#N)C1=CC=CC=C1	1	1	0	1	0	1	subs/inhib	0	1
OC(NC(=O)NC(O)C(Cl)(Cl)Cl)C(Cl)(Cl)Cl	0			0	0	0	0	NA	NA
O=CC1=CC=CC=C1C=O	0		0	0	0	0	0	NA	0
OC(=O)CN1C2=C(C=CC=C2)C(=O)C3=C1C=CC=C3	0	0	0	0	0	0	0	0	0
OCCC1=CC=CC=C1	0	1	0	0	0	0	0	0	0
[O-][N+](=O)C1=CC=C(NC(=O)NC2=CC=C(C=C2)[N+]([O-])=O)C=C1	0	0	0	0	0	0	0	0	0
NCC1=C(SC2=C(CO)C=CC=C2)C=CC=C1	1	0	0	0	1	1	0	1	1
C[C@H](O)CN(C)C	0	0	0	0	0	0	0	0	0
C(CNCC1=CC=CC=C1)NCC2=CC=CC=C2	1	1	0	0	1	0	0	subs/inhib	0
CCCC1=CC=C(C=C1)C(O)=O	0	0	0	0	0	0	0	0	0
OC(=O)C1=C(C=CC=C1)C2=CC=C(C=C2)C(F)(F)F			0	0	0	0	NA	NA	0
COC(=O)CCCCCCCCC=C	0	0	0	0	0	0	0	0	0
CC(=O)OC1=CC=C(C)C=C1	0		0	0	0	0	0	NA	0
OCC1=CC=C[N+]([O-])=C1	0	0	0	0	0	0	0	0	0
[O-][N+](=O)C1=NC=CN1CC(=O)NCC2=CC=CC=C2	0	0	0	0	0	0	0	0	0
OC1=C(I)C=C(C=C1I)[N+]([O-])=O	0	0	0	0	0	0	0	0	0
CC1=CC=C(O)C(=C1)N2N=C3C=CC=CC3=N2	1	1	1	1	0	1	subs/inhib	0	subs/inhib
NC1=CC2=NC3=CC(N)=CC=C3C=C2C=C1	0	1	0	0	0	1	0	0	1
CCN1C(=CC=CC2=[N+](CC)C3=CC=CC=C3C=C2)C=CC4=C1C=CC=C4		0		0	1	1	NA	1	NA
OC1=C(I)C2=C(C=C1I)C3(OC(=O)C4=C3C=CC=C4)C5=C(O2)C(I)=C(O)C(I)=C5	1	1	0	0	0	0	0	0	0
CC1=CN([C@H]2C[C@H](F)[C@@H](CO)O2)C(=O)NC1=O	0	0	0	0	0	0	0	0	0
CC(C)CCOC(=O)C1=CC=C(C=C1)N(C)C	1	1	1	1	0	0	subs/inhib	0	0
CCOC(=O)C(C#N)=C(C1=CC=CC=C1)C2=CC=CC=C2	1	1	0	1	0	0	subs/inhib	0	0
OS(=O)(=O)C1=CC2=C(NC(=N2)C3=CC=CC=C3)C=C1	0		0	0	1	0	0	NA	0
OC(=O)C1=CC=C(OCCCOC2=CC=C(C=C2)C(O)=O)C=C1	0	0	0	0	0	0	0	0	0
OC1=CC(O)=CC(O)=C1	0	0	0	0	0	0	0	0	0
COC1=CC=C2N=CC=C([C@@H](O)[C@@H]3C[C@@H]4CCN3C[C@@H]4C=C)C2=C1	0	0	0				NA	NA	NA
CCCCCCCCCCCCOCCOCCOCCOCCOCCOCCOCCOCCOCCO	1	1		0	0	1	0	0	NA
CC(=O)O[C@]1(C(C)=O)C(=C)C[C@H]2[C@@H]3C=C(C)C4=CC(=O)CC[C@]4(C)[C@H]3CC[C@]12C	1	0	1	0	0	0	0	0	0
CN1CCN(CC1)C2=C(F)C=C3C(=O)C(=CN(C4=CC=C(F)C=C4)C3=C2)C(O)=O	0	0	1	0	0	0	0	0	0
C[C@]12C=CC3=C4CCC(=O)C=C4CC[C@H]3[C@@H]1CC[C@@]2(O)CC=C	1	0	1	0	1	1	0	1	subs/inhib
OC[C@H]1O[C@H](C[C@@H]1O)N2C=C(C(=O)NC2=O)C(F)(F)F	0	0	0	0	0	0	0	0	0
C[C@@H]1CCN([C@H](C1)C(O)=O)C(=O)[C@H](CCCNC(N)=N)N[S+]([O-])(=O)C2=CC=CC3=C2NCC(C)C3	0	0	1				NA	NA	NA
O=C1N(C[C@H]2CCCC3=C2C1=CC=C3)[C@@H]4CN5CCC4CC5	0	1	0	0	0	0	0	0	0
CC1=CC=C(\C=C2\C3CCC(C)(C2=O)C3(C)C)C=C1	1	1	1	1	0	0	subs/inhib	0	0
CCN(CC)CCOC(=O)C1(CCCC1)C2=CC=CC=C2	0	1	0	0	1	0	0	subs/inhib	0
CN1N=NC2=C(N=CN2C1=O)C(N)=O	0	0	0	0	0	0	0	0	0
ClC1=C(COC(CN2C=CN=C2)C3=C(Cl)C=C(Cl)C=C3)C=CS1	1	1	1	1	1	1	subs/inhib	subs/inhib	subs/inhib
COC(=O)C1=C(NC(C)=C(C1C2=CC(=CC=C2)[N+]([O-])=O)C(=O)OC(C)C)C#N	1			1	0	1	subs/inhib	NA	NA
CC(C)OC(=O)C1=C(C)NC(N)=C(C1C2=CC=CC(=C2)[N+]([O-])=O)C(=O)OC3CN(C3)C(C4=CC=CC=C4)C5=CC=CC=C5	0	0	1	1	1	1	1	1	subs/inhib
CN1C=C(C(=O)[C@@H]2CCC3=C(C2)NC=N3)C4=C1C=CC=C4	0	0	0	0	0	0	0	0	0
OC(C(=O)O[C@@H]1C[C@@H]2CC[C@H](C1)[N+]23CCCC3)(C4=CC=CC=C4)C5=CC=CC=C5	0	0	0	0	1	0	0	1	0
COC1=C(OC2=C(NS(=O)(=O)C3=CC=C(C=C3)C(C)(C)C)N=C(N=C2OCCO)C4=NC=CC=N4)C=CC=C1	0	0	0	0	0	0	0	0	0
CCCN[C@H]1CCC2=C(C1)SC(N)=N2	0	1	0	0	0	0	0	0	0
CCOC1=C(OCCN[C@H](C)CC2=CC(=C(OC)C=C2)S(N)(=O)=O)C=CC=C1	0	1	0	0	0	1	0	0	1
CN1C(CCl)NC2=CC(Cl)=C(C=C2S1(=O)=O)S(N)(=O)=O	0		0	0	0	0	0	NA	0
CCCSSC(CCO)=C(C)N(CC1=C(N)N=C(C)N=C1)C=O	0	1	1	0	0	0	0	0	0
CCOC1=CC(OCC)=C(OCC)C=C1C(=O)CCC(O)=O	0	0	0	0	0	0	0	0	0
OC1=C2C(=NC(=C1)C([O-])=O)C(=O)C=C3OC4=CC=CC=C4N=C23	0			0	1	1	0	NA	NA
CCC(C)(OC1=CC=C(C=C1)C2(CCCCC2)C3=CC=C(OC(C)(CC)C(O)=O)C=C3)C(O)=O	1	0	0	0	0	0	0	0	0
CC1=CC=CC(C)=C1NC(=O)CC23CCCN2CCC3	0	0	0	0	0	0	0	0	0
CC(C)C(=O)OCC\C(SS\C(CCOC(=O)C(C)C)=C(\C)N(CC1=C(N)N=C(C)N=C1)C=O)=C(/C)N(CC2=C(N)N=C(C)N=C2)C=O	1	1	1	0	0	1	0	0	subs/inhib
CC[C@]12C=CC3=C4CCC(=O)C=C4CC[C@H]3[C@@H]1CC[C@@]2(O)C#C	0	0	1	0	1	1	0	1	subs/inhib
CCN1CC(CCN2CCOCC2)C(C1=O)(C3=CC=CC=C3)C4=CC=CC=C4	0	0	1	0	1	0	0	1	0
CC(=O)O[C@H]1[C@H](C[C@H]2[C@@H]3CC[C@H]4C[C@H](OC(C)=O)[C@H](C[C@]4(C)[C@H]3CC[C@]12C)N5CCCCC5)[N+]6(C)CCCCC6	0	0	0	0	0	0	0	0	0
CC(=O)NC1=CC=C(OC(=O)C2=C(OC(C)=O)C=CC=C2)C=C1	1	1	1	0	0	0	0	0	0
COC1=CC=C(C=C1)C2=CC(=S)SS2	1	1	1	0	0	0	0	0	0
CC(C)C1=CC=C2OC3=C(C=C(C(O)=O)C(N)=N3)C(=O)C2=C1	0	0	0	0	0	0	0	0	0
CCOC1=NC2=CC=CC(C(O)=O)=C2N1CC3=CC=C(C=C3)C4=CC=CC=C4C5=NN=NN5	0	0	0	0	1	0	0	1	0
CCN(CC)C(C)C(=O)C1=CC=CC=C1	0	0	1	0	0	0	0	0	0
OCN1C(=O)CCC1=O	0	0		0	0	0	0	0	NA
CNC(=O)C1=NC=CC(OC2=CC=C(NC(=O)NC3=CC=C(Cl)C(=C3)C(F)(F)F)C=C2)=C1	0	0	1	0	0	0	0	0	0
COC1=CC=CC(CCC2=C(OCC(CN(C)C)OC(=O)CCC(O)=O)C=CC=C2)=C1	1	1	0	0	1	0	0	subs/inhib	0
CCCCN(CCCC)CC(O)C1=C2C(=CC(Cl)=C1)\C(=C/C3=CC=C(Cl)C=C3)C4=C2C=CC(Cl)=C4	0	0	0	0	1	0	0	1	0
NC1=C2CN(C3CCC(=O)NC3=O)C(=O)C2=CC=C1	0	0	0	0	0	0	0	0	0
COC(=O)C1=C(C)NC(C)=C(C1C2=CC(=CC=C2)[N+]([O-])=O)C(=O)OC(C)(C)CN(C)CCC(C3=CC=CC=C3)C4=CC=CC=C4	1	0	1	1	1	1	subs/inhib	1	subs/inhib
COC(=O)C1=C(C)NC(C)=C(C1C2=CC=CC(=C2)[N+]([O-])=O)C(=O)OCCN3CCN(CC3)C(C4=CC=CC=C4)C5=CC=CC=C5	1	0	1	1	1	0	subs/inhib	1	0
CN(C)C1=CC2=[S+]C3=C(C=CC(=C3)N(C)C)N=C2C=C1		0		1	1	1	NA	1	NA
CC(=O)OCC(=O)NCCCOC1=CC=CC(CN2CCCCC2)=C1	0	0	0	0	0	0	0	0	0
CCOC(=O)\C=C(C)\C=C\C=C(/C)C=CC1=C(C)C(C)=C(OC)C=C1C	1		0	1	0	0	subs/inhib	NA	0
CCCCC1=NC=C(\C=C(/CC2=CC=CS2)C(O)=O)N1CC3=CC=C(C=C3)C(O)=O	0	0	0	0	0	0	0	0	0
CS(=O)(=O)CCNCC1=CC=C(O1)C2=CC3=C(NC4=CC(Cl)=C(OCC5=CC=CC(F)=C5)C=C4)N=CN=C3C=C2	0	0	0	1	1	1	1	1	1
CC[N+]3(CCOC(=O)C(O)(C1=CC=CC=C1)C2=CC=CC=C2)CCCCC3			0	0	1	0	NA	NA	0
OC(=O)CCN1C2=C(C[C@@H](CC2)NS(=O)(=O)C3=CC=C(F)C=C3)C4=C1C=CC=C4	0	0	0	0	0	0	0	0	0
COC1=NC2=C(NC(=N2)S(=O)CC3=C(C)C(OC)=C(C)C=N3)C=C1		0	1	0	0	0	NA	0	0
OC(CNCCCCCCNCC(O)C1=CC(O)=C(O)C=C1)C2=CC(O)=C(O)C=C2	1	0	0	0	0	1	0	0	1
COC1=CC(C)=C(CC2=C(N)N=C(N)N=C2)C=C1OC	0	0	0	0	0	0	0	0	0
CCC(C)(C)C1=CC=C(CC(C)CN2C[C@H](C)O[C@H](C)C2)C=C1	1	1	1	0	1	0	0	subs/inhib	0
CCOC(=O)C1=CN=C(C=C1)C#CC2=CC3=C(SCCC3(C)C)C=C2	1	1		0	0	0	0	0	NA
CN(C)C(=O)COC(=O)CC1=CC=C(OC(=O)C2=CC=C(NC(N)=N)C=C2)C=C1	0	0	0	0	0	0	0	0	0
CC1CN(CCN1)C2=C(F)C(C)=C3C(=O)C(=CN(C4CC4)C3=C2)C(O)=O	0	0	0	0	0	0	0	0	0
CN1C2=C(C3=C1C=CC=C3)C(=O)N(CC4=C(C)NC=N4)CC2	0	0	0	1	1	1	1	1	1
COC1=C(OC)C=C(C=C1)C(=O)NCC2=CC=C(OCCN(C)C)C=C2	0	0		0	0	0	0	0	NA
CCN(C)C(=O)OC1=CC=CC(=C1)[C@H](C)N(C)C	0	1	0	0	0	0	0	0	0
CNC1CCCN(C1)C2=C(OC)C3=C(C=C2F)C(=O)C(=CN3C4CC4)C(O)=O	0	0	0	0	0	0	0	0	0
CCCC1=NC(C)=C2N1NC(=NC2=O)C3=CC(=CC=C3OCC)[S+]([O-])(=O)N4CCN(CC)CC4	0	0	0	0	0	1	0	0	1
C[C@H]1COC2=C(C(F)=CC3=C2N1C=C(C(O)=O)C3=O)C4(N)CC4	0	0	0	0	0	0	0	0	0
NC1CCN(C1)C2=NC3=C(C=C2F)C(=O)C(=CN3C4=C(F)C=C(F)C=C4)C(O)=O	0	0	0	0	0	0	0	0	0
COC1=C(OC)C=C2C(=O)C(CC3CCN(CC4=CC=CC=C4)CC3)CC2=C1	0	0	0	0	0	0	0	0	0
CC(C)NCC(O)C1=C(Cl)C=CC=C1	0	1	0	0	0	0	0	0	0
N1C=CC2=C1C=CC=C2	0	0	0	0	0	0	0	0	0
CC1=CNC2=C1C=CC=C2	0	0	0	0	0	0	0	0	0
NCC(O)C1=CC=CC(O)=C1	0			0	0	0	0	NA	NA
NC1=C(N)C=NC=C1	0	0	0	0	0	0	0	0	0
CC(C)CCC[C@@H](C)CCC[C@@H](C)CCC[C@]1(C)CCC2=C(C)C(OC(=O)CCC(O)=O)=C(C)C(C)=C2O1		0	1	0	0	0	NA	0	0
CN1C2=C(NC(Br)=N2)C(=O)N(C)C1=O	0	0	0	0	0	0	0	0	0
CO[C@H]1[C@@H](C[C@@H]2CN3CCC4=C(NC5=C4C=CC(OC)=C5)[C@H]3C[C@@H]2[C@@H]1C(=O)OC)OC(=O)COC6=CC=C(OC)C=C6	1	1	1	0	1	1	0	subs/inhib	subs/inhib
FC(F)(F)C1=CC=CC(=C1)C2=CCN(CCC3=CC=C4C=CC=CC4=C3)CC2	1	1	1	0	1	0	0	subs/inhib	0
CCN(CC)CCCN(C1CC2=C(C1)C=CC=C2)C3=CC=CC=C3	0	1	1	0	1	0	0	subs/inhib	0
CC(CC1=CC(C)=CC(=O)N1O)CC(C)(C)C	0	0	0				NA	NA	NA
OC(=O)CN1C(=CC2=C1C=CC=C2)C(=O)NC3=NC(=CS3)C4=C(Cl)C=CC=C4	1	0	1	0	0	0	0	0	0
NCCNC(=O)C1=CC=C(Cl)C=N1	0	1	0	0	0	0	0	0	0
CC1CCN(CCCC(=O)C2=CC=C(F)C=C2)CC1	0	1	0	0	1	0	0	subs/inhib	0
FC(F)(F)C1=CC=CC(NC2=C(C=CC=N2)C(=O)OC3OC(=O)C4=C3C=CC=C4)=C1	1	1		1	0	0	subs/inhib	0	NA
NC(=O)COCCN1CCN(CC1)C(C2=CC=CC=C2)C3=CC=C(Cl)C=C3	0		1	0	0	0	0	NA	0
FC1=CC=C(C=C1)N2CCN(CCCN3C4=C5C(=CC=CC5=CC=C4)S3(=O)=O)CC2	1	1	1	0	1	1	0	subs/inhib	subs/inhib
CC(C)(CC1=CNC2=C1C=CC=C2)NCC(O)COC3=C(C=CC=C3)C#N	0	1	1	0	1	0	0	subs/inhib	0
COC1=C(OCCNCC(O)COC2=CC=CC3=C2C4=CC=CC=C4N3)C=CC=C1	0	1	1	1	1	1	1	subs/inhib	subs/inhib
CC1(C)CC1C(=O)N\C(=C\CCCCSCC(N)C(=O)O[Na])C(O)=O			0	0	0	0	NA	NA	0
CCOC(=O)[C@H](CCC1=CC=CC=C1)N[C@@H](C)C(=O)N2CC3=CC=CC=C3C[C@H]2C(O)=O	0	0	0	0	0	0	0	0	0
CCOC(=O)C1(CCN(CCC(C#N)(C2=CC=CC=C2)C3=CC=CC=C3)CC1)C4=CC=CC=C4			1	1	1	0	NA	NA	0
CCC1=CC=C(C=C1)C(=O)C(C)CN2CCCCC2	0	1	1	0	1	0	0	subs/inhib	0
CC(C(O)=O)C1=CC=C2OC3=C(CC2=C1)C=CC=N3	0	0	0	0	0	0	0	0	0
COC1=C2C(=O)C3=C(C(=O)C2=CC=C1)C(O)=C4C[C@](O)(C[C@H](O[C@H]5C[C@H](N)[C@H](O[C@H]6CCCCO6)[C@H](C)O5)C4=C3O)C(=O)CO			1				NA	NA	NA
ONC(=O)CCCCCCC(=O)NC1=CC=CC=C1	0	0	0	0	1	0	0	1	0
CC1=NC=C2CN=C(C3=C(F)C=CC=C3)C4=C(C=CC(Cl)=C4)N12	0	0	1	0	0	1	0	0	subs/inhib
C1=NN=NN1C2=CC=CC=C2	0	0	0	0	0	0	0	0	0
CC(C)CN1C=NC2=C1C(=O)N(C)C(=O)N2C	0	0	0	0	0	0	0	0	0
CC(C)=CC1C(C(=O)OCN2C(=O)C3=C(CCCC3)C2=O)C1(C)C	1	1	1	1	1	0	subs/inhib	subs/inhib	0
CCCN(CCC1=CC=CS1)[C@H]2CCC3=C(O)C=CC=C3C2	1	1	1	0	1	0	0	subs/inhib	0
OC(=O)C1=CC(=CC=C1)C2=NOC(=N2)C3=C(F)C=CC=C3	0	0	0	1	1	1	1	1	1
CC(C)CN(C[C@@H](O)[C@H](CC1=CC=CC=C1)NC(=O)O[C@H]2CO[C@H]3OCC[C@@H]23)S(=O)(=O)C4=CC=C(N)C=C4	0	0	1	1	0	1	1	0	subs/inhib
CC(C)NC1=C(N=CC=C1)N2CCN(CC2)C(=O)C3=CC4=C(N3)C=CC(NS(C)(=O)=O)=C4	0	1	1	1	1	1	1	subs/inhib	subs/inhib
NC1=NC(=O)N(C=C1)[C@@H]2O[C@H](CO)[C@@H](O)C2(F)F	0	0	0	0	0	0	0	0	0
ClC1=CC=C(C=C1)C(C#N)C2=C(Cl)C=C(C=C2Cl)N3N=CC(=O)NC3=O	0	0	0	0	0	1	0	0	1
OC[C@H]1O[C@@H](OCCC2=CC=C(O)C=C2)[C@H](O)[C@@H](O)[C@@H]1O	0	0		0	0	0	0	0	NA
C[C@H]1C[C@H](C)C(=O)[C@@H](C1)[C@H](O)CC2CC(=O)NC(=O)C2	0	0	0	0	0	0	0	0	0
COC1=C(OC)C2=C(CC3N(CCC4=C3C=C5OCOC5=C4)C2)C=C1	1	1	0	0	1	1	0	subs/inhib	1
CN1CCCN=C1\C=C\C2=CC=CS2	0	1	0	0	0	1	0	0	1
CN1CCCC(CC1)N2N=C(CC3=CC=C(Cl)C=C3)C4=C(C=CC=C4)C2=O	0	1	0	0	1	1	0	subs/inhib	1
ClC1=CC(Cl)=C(CO\N=C(/CN2C=CN=C2)C3=C(Cl)C=C(Cl)C=C3)C=C1	1	1	1	1	1	1	subs/inhib	subs/inhib	subs/inhib
CCN1C=C(C(O)=O)C(=O)C2=C1C=C(N3CCN(C)CC3)C(F)=C2	0	0	0	0	0	0	0	0	0
C[C@H](N)[C@H](O)C1=CC(O)=CC=C1	0	0	1	0	0	0	0	0	0
CC(N)CCCC(C)(C)O			0	0	0	0	NA	NA	0
CC[C@H]1OC(=O)[C@H](C)[C@@H](O[C@H]2C[C@@](C)(OC)[C@@H](O)[C@H](C)O2)[C@H](C)[C@@H](O[C@@H]3O[C@H](C)C[C@@H]([C@H]3O)N(C)C)[C@@](C)(C[C@@H](C)C(=O)[C@H](C)[C@@H](O)[C@]1(C)O)OC	0	0	1	0	0	0	0	0	0
CC(CN1CCCCC1)C(=O)C2=CC=C(C)C=C2	0	1	0	0	1	0	0	subs/inhib	0
ClC1=CC=C(C=C1)C(OCCN2CCCCC2)C3=CC=CC=C3	1	1	1	0	1	1	0	subs/inhib	subs/inhib
NCC(=O)CCC(O)=O		0	0	0	0	0	NA	0	0
CCOC(=O)[C@H](CCC1=CC=CC=C1)N[C@@H](C)C(=O)N2[C@H]3CCC[C@H]3C[C@H]2C(O)=O	0	0	1	0	0	0	0	0	0
COC1=CC=C(CN(CCN(C)C)C2=NC=CC=N2)C=C1	0	1	0	0	1	0	0	subs/inhib	0
CN1C2=C(C=C(Cl)C=C2)C(=NCC1=O)C3=CC=CC=C3	0	0	0	0	0	1	0	0	1
CCN(CC)CCOC(=O)C(CC1CCCO1)CC2=C3C=CC=CC3=CC=C2	1	1	1	0	1	1	0	subs/inhib	subs/inhib
CCN(CC)CCOC(=O)C(C1CCCCC1)C2=CC=CC=C2	1	1	1	0	1	1	0	subs/inhib	subs/inhib
CS(=O)(=O)C1=CC=C(C=C1)[C@@H](O)[C@@H](CO)NC(=O)C(Cl)Cl	0	0		0	0	0	0	0	NA
CC(CC1=CC=CC(=C1)C(F)(F)F)NCCOC(=O)C2=CC=CC=C2	1	1	1	0	1	1	0	subs/inhib	subs/inhib
CCCCCC(C)N			1	0	0	0	NA	NA	0
CCN1CCCC(C1)OC(=O)C(C2=CC=CC=C2)C3=CC=CC=C3	0	1	1	0	1	0	0	subs/inhib	0
C[C@]12C[C@H](O)[C@@]3(F)C(CCC4=CC(=O)C=C[C@]34C)C1C[C@@H](O)[C@]2(O)C(=O)CO	0	0	1				NA	NA	NA
O[C@H]1CC[C@H]2CN3CCC4=C(NC5=C4C=CC=C5)[C@@H]3C[C@@H]2[C@H]1C(O)=O	0	0	0	0	1	1	0	1	1
COC1=CC2=C3[C@@H](CC4=CC(OC5=C(OC)C=C6CCN(C)[C@@H](CC7=CC=C(OC3=C1O)C=C7)C6=C5)=C(O)C=C4)[N+](C)(C)CC2	1	0	0	0	0	0	0	0	0
NC1=NC(=CS1)C(=N\O)\C(=O)N[C@H]2[C@H]3SCC(C=C)=C(N3C2=O)C(O)=O	0	0	0	0	0	0	0	0	0
CN(N=O)C(=O)N[C@H]1[C@@H](O)O[C@H](CO)[C@@H](O)[C@@H]1O	1	0		0	0	0	0	0	NA
CN(CC1=C(N)C(Br)=CC(Br)=C1)C2CCCCC2	1	1	1	0	1	0	0	subs/inhib	0
CN(C)CCC[C@]1(OCC2=C1C=CC(=C2)C#N)C3=CC=C(F)C=C3	0	1	0	0	0	0	0	0	0
CN1CCCN=C1\C=C\C2=C(C)C=CS2	0	1	1	0	1	0	0	subs/inhib	0
CCCCN1CCCCC1C(=O)NC2=C(C)C=CC=C2C		0	1				NA	NA	NA
O[C@H]1[C@H](O)[C@@H](O)[C@H](O)[C@H](O)[C@@H]1O		0		0	0	0	NA	0	NA
CC(C)[C@H](N)C(=O)OCCOCN1C=NC2=C1N=C(N)NC2=O	0	0	0	0	0	0	0	0	0
CCC1=C2C=C(OC(=O)N3CCC(CC3)N4CCCCC4)C=CC2=NC5=C1CN6C5=CC7=C(COC(=O)[C@]7(O)CC)C6=O	0	0	0	0	0	0	0	0	0
CN1C(C)(C)CCCC1(C)C	0	0	0	0	1	0	0	1	0
CO\N=C1/CN(CC1CN)C2=C(F)C=C3C(=O)C(=CN(C4CC4)C3=N2)C(O)=O	0		0	0	0	0	0	NA	0
CC1(C)O[C@@H]2CO[C@@]3(COS(N)(=O)=O)OC(C)(C)O[C@H]3[C@@H]2O1	0	0	0	0	0	0	0	0	0
CC(CN(C)C)CN1C2=C(SC3=C1C=CC=C3)C=CC=C2	0	1	0				NA	NA	NA
COC1=CC2=CC=CN=C2C(NC(C)CCCN)=C1	0	1	0	0	1	0	0	subs/inhib	0
CC(=O)N(O)CCCCCNC(=O)CCC(=O)N(O)CCCCCNC(=O)CCC(=O)N(O)CCCCCN	0	1	0	0	0	0	0	0	0
N[C@H]1[C@H](O)O[C@H](CO)[C@@H](O)[C@@H]1O	1						NA	NA	NA
CN(C)[C@H]1[C@@H]2C[C@@H]3CC4=C(C(O)=CC=C4N(C)C)C(=O)C3=C(O)[C@]2(O)C(=O)C(C(N)=O)=C1O	0	0	0	0	0	0	0	0	0
CCN(CC)C(C)CN1C2=C(SC3=C1C=CC=C3)C=CC=C2	0	1	1	0	0	0	0	0	0
CC[C@@H](CO)NCCN[C@@H](CC)CO	0	0		0	0	0	0	0	NA
NC1=C2N=CN([C@@H]3O[C@H](CO)[C@@H](O)[C@H]3O)C2=NC=N1	0	0	0	0	0	0	0	0	0
C[N+]1(C)CCCC(C1)OC(=O)C(O)(C2=CC=CC=C2)C3=CC=CC=C3	0	0		0	0	0	0	0	NA
CC1(C)S[C@@H]2[C@H](NC(=O)[C@H](N)C3=CC=CC=C3)C(=O)N2[C@H]1C([O-])=O	0	0	0				NA	NA	NA
NC(=N)C1=CC=C(OCCCCCOC2=CC=C(C=C2)C(N)=N)C=C1	1	0	0	0	0	0	0	0	0
C[C@@H]1CN(CC[C@]1(C(O)=O)C2=CC=CC=C2)[C@H]3CC[C@](CC3)(C#N)C4=CC=C(F)C=C4	0	0	0	0	1	0	0	1	0
CCN[C@H]1C[C@H](C)[S+]([O-])(=O)C2=C1C=C(S2)[S+](N)([O-])=O	0	1	0				NA	NA	NA
CCCNC(C)C(=O)NC1=C(SC=C1C)C(=O)OC	0	0	0	0	0	0	0	0	0
CCCCN(CCCC)CCC(O)C1=CC2=C(Cl)C=C(Cl)C=C2C3=C1C=CC(=C3)C(F)(F)F	0	0	1	0	1	1	0	1	subs/inhib
COC(=O)[C@@]1(C)[C@H](C)C[C@H]2[C@@H]3CCC4=CC(=O)C=C[C@]4(C)[C@H]3[C@@H](O)C[C@]12C	0	0	1	1	0	0	1	0	0
CCO[C@@H]1O[C@H](C(COCC2=CC=CC=C2)OCC3=CC=CC=C3)[C@H](OCC4=CC=CC=C4)[C@H]1O	1	0	0	1	0	1	subs/inhib	0	1
CCNCC(O)C1=CC(O)=CC=C1	0	0		0	0	0	0	0	NA
CC(C)(C)C(=O)OCOC(=O)[C@@H]1N2[C@H](SC1(C)C)[C@H](NC(=O)[C@H](N)C3=CC=CC=C3)C2=O	1	0		0	0	1	0	0	NA
CCC1(CCCCN(C)C1)C2=CC(O)=CC=C2	0	1	0	0	0	0	0	0	0
CCC(=O)O[C@@]1([C@H](C)C[C@H]2C3C[C@H](F)C4=CC(=O)C=C[C@]4(C)[C@@]3(F)[C@@H](O)C[C@]12C)C(=O)SCF	0	0	1	1	0	1	1	0	subs/inhib
NC(=O)C1=CC=[N+](CC2=C(N3[C@H](SC2)[C@H](NC(=O)CC4=CC=CS4)C3=O)C([O-])=O)C=C1	0	0	0	0	0	0	0	0	0
NS(=O)(=O)C1=C(Cl)C=C2NC(CC3CCCC3)NS(=O)(=O)C2=C1	1	0	0	0	0	0	0	0	0
CN(C\C=C\C1=CC=CC=C1)CC2=C3C=CC=CC3=CC=C2	1	1	1	0	1	0	0	subs/inhib	0
CN1C(=O)CC(C1=O)C2=CC=CC=C2	0	0	0	0	0	0	0	0	0
CN1C2=C(C3=C1C=CC=C3)C(=O)C(CN4C=CN=C4C)CC2	0	1	0	0	0	0	0	0	0
CC(C)NCC(O)COC1=C(OCC=C)C=CC=C1	0	1	0	0	0	0	0	0	0
CCC1NC(=O)C2=CC(=C(Cl)C=C2N1)S(N)(=O)=O		0	0	0	0	0	NA	0	0
CN(C)[C@H]1[C@@H]2[C@@H](O)[C@@H]3C(=C)C4=C(C(O)=CC=C4)C(=O)C3=C(O)[C@]2(O)C(=O)C(C(N)=O)=C1O	0	0	0	0	0	0	0	0	0
C[C@H](CCC(O)=O)[C@H]1CC[C@H]2[C@@H]3[C@@H](O)C[C@@H]4C[C@H](O)CC[C@]4(C)[C@H]3CC[C@]12C	0	0	1	0	0	0	0	0	0
CS(=O)(=O)C1=CC=C(C=C1)[C@@H](O)[C@@H](CF)NC(=O)C(Cl)Cl			0	0	0	0	NA	NA	0
COCC(=O)NC1=C(I)C(C(=O)N(C)CC(O)CO)=C(I)C(C(=O)NCC(O)CO)=C1I	0	0	0	0	0	0	0	0	0
CC1CC(CC(C)(C)N1C)OC(=O)C(O)C2=CC=CC=C2	0	1	0	0	0	0	0	0	0
CC(O)(P(O)([O-])=O)P(O)([O-])=O			1	0	0	0	NA	NA	0
CC(CNC1CCCCC1)OC(=O)C2=CC=CC=C2	0	1	0	0	1	0	0	subs/inhib	0
CC(CC1=CC=CC=C1)N(C)CC2=C(C(C)C)C(=O)N(N2C)C3=CC=CC=C3	1	1	1	1	0	1	subs/inhib	0	subs/inhib
CCN1C(=O)NC(C1=O)C2=CC=CC=C2	0	0	0	0	0	0	0	0	0
[O-][N+](=O)C1=CC=C(O1)\C=N\N2CC(CN3CCOCC3)OC2=O	1	1		0	0	1	0	0	NA
ClCCNP1(=O)OCCCN1CCCl	0	0	0	0	0	0	0	0	0
CC(=O)[C@H]1CC[C@H]2[C@@H]3C=CC4=CC(=O)CC[C@@]4(C)[C@@H]3CC[C@]12C	0	0	1	0	0	0	0	0	0
CCN(CC)CCC1=NC(=NO1)C2=CC=CC=C2	0	1	0	0	0	0	0	0	0
C[C@H]1C[C@H]2[C@@H]3CC[C@H](C(C)=O)[C@@]3(C)C[C@H](O)[C@@H]2[C@@]4(C)CCC(=O)C=C14	0	0	1	1	0	0	1	0	0
CC1(C)O[C@@H]2C[C@H]3[C@@H]4CCC5=CC(=O)CC[C@]5(C)[C@@]4(F)[C@@H](O)C[C@]3(C)[C@@]2(O1)C(=O)CCl	0	0	1	1	0	0	1	0	0
CC(=O)NC1CCSC1=O	0	0	0	0	0	0	0	0	0
CC1(C)O[C@@H]2C[C@H]3[C@@H]4C[C@H](F)C5=CC(=O)C=C[C@]5(C)[C@H]4[C@@H](O)C[C@]3(C)[C@@]2(O1)C(=O)CO	0	0	1	0	0	0	0	0	0
OC1=CC=C(C=C1)C(=O)N\N=C\C2=CC=C(O2)[N+]([O-])=O	0	1	1				NA	NA	NA
COC1=C(O)C=C(C=C1)[C@@H]2CC(=O)C3=C(O2)C=C(O[C@@H]4O[C@H](CO[C@@H]5O[C@@H](C)[C@H](O)[C@@H](O)[C@H]5O)[C@@H](O)[C@H](O)[C@H]4O)C=C3O	0	0	0	0	0	0	0	0	0
COC1=CC(=CC(OC)=C1O)[C@H]2[C@@H]3[C@H](COC3=O)[C@H](O[C@@H]4O[C@@H]5CO[C@@H](C)O[C@H]5[C@H](O)[C@H]4O)C6=C2C=C7OCOC7=C6	0	0	0	0	0	0	0	0	0
CC(=O)SCC(CC1=CC=CC=C1)C(=O)NCC(=O)OCC2=CC=CC=C2	1	1	1				NA	NA	NA
NC1=NC(=CS1)C(=N\OCC(O)=O)\C(=O)N[C@H]2[C@H]3SCC(C=C)=C(N3C2=O)C(O)=O	0	0	0	0	0	0	0	0	0
CO[C@H]1C=CO[C@@]2(C)OC3=C(C2=O)C4=C(C(O)=C3C)C(O)=C(NC(=O)C(C)=CC=C[C@H](C)[C@H](O)[C@@H](C)[C@@H](O)[C@@H](C)[C@H](OC(C)=O)[C@@H]1C)C(\C=N\N5CCN(C)CC5)=C4O	0	0	0	0	0	0	0	0	0
CC(C)(C)NCC(O)COC1=C2CCC(=O)NC2=CC=C1	0	0	0	0	0	0	0	0	0
CCN[C@H]1CN(CCCOC)S(=O)(=O)C2=C1C=C(S2)S(N)(=O)=O	0	0	0	0	0	0	0	0	0
CN(C)C(=O)OC1=CC(=CC(OC(=O)N(C)C)=C1)C(O)CNC(C)(C)C	0	1	0	0	1	0	0	subs/inhib	0
CC1=C(N2[C@H](SC1)[C@H](NC(=O)[C@H](N)C3=CC=C(O)C=C3)C2=O)C(O)=O	0		0	0	0	0	0	NA	0
C[C@H](NCCC1=CC=C(O)C=C1)[C@H](O)C2=CC=C(O)C=C2	0	1	0	0	0	0	0	0	0
CC(C(O)=O)C1=CC=C(S1)C(=O)C2=CC=CC=C2	0	0	0	0	0	0	0	0	0
C[C@@H]1C[C@H]2[C@@H]3CCC4=CC(=O)C=C[C@]4(C)[C@@]3(Cl)[C@@H](O)C[C@]2(C)[C@@]1(OC(=O)C5=CC=CO5)C(=O)CCl	1	1	1	1	1	1	subs/inhib	subs/inhib	subs/inhib
OC(=O)CCCC[C@@H]1SC[C@@H]2NC(=O)N[C@H]12	0	0		0	0	0	0	0	NA
CCOC(=O)OC(C)OC(=O)[C@@H]1N2[C@H](SC1(C)C)[C@H](NC(=O)[C@H](N)C3=CC=CC=C3)C2=O	1	1	1	0	0	1	0	0	subs/inhib
CN(C)CCN1N=NN=C1SCC2=C(N3[C@H](SC2)[C@H](NC(=O)CC4=CSC(N)=N4)C3=O)C(O)=O	0			0	0	0	0	NA	NA
ClC1=CC=C(CCC(CN2C=CN=C2)SC3=C(Cl)C=CC=C3Cl)C=C1	0	0	1	1	1	1	1	1	subs/inhib
CCC(=O)O[C@H]1CC[C@H]2[C@@H]3CCC4=CC(=O)CC[C@]4(C)[C@H]3CC[C@]12C	1	1	1	0	0	0	0	0	0
NC(=O)OCC(O)COC1=CC=C(Cl)C=C1	0	0	1	0	0	0	0	0	0
NCCCC[C@H](N[C@@H](CCC1=CC=CC=C1)C(O)=O)C(=O)N2CCC[C@H]2C(O)=O	0	0		0	0	0	0	0	NA
CN(C)S(=O)(=O)C1=CC=C2SC3=C(C=CC=C3)N(CCCN4CCN(C)CC4)C2=C1	0	1	1	0	0	1	0	0	subs/inhib
CN1[C@H]2CC[C@@H]1C[C@@H](C2)OC(=O)C(O)C3=CC=CC=C3	0		0	0	0	0	0	NA	0
CCC(C)(CN(C)C)OC(=O)C1=CC=CC=C1	0	1	0	0	0	0	0	0	0
ClC1=CC(Cl)=C(C=C1)C(CN2C=CN=C2)OCC3=C(Cl)C=CC=C3Cl	0	0	1	1	1	1	1	1	subs/inhib
C[C@]12C[C@H](O)[C@H]3[C@@H](CCC4=CC(=O)C=C[C@]34C)[C@@H]1CC[C@]2(O)C(=O)CO	1	0	1	0	0	0	0	0	0
CC(=O)CC(C1=CC=C(C=C1)[N+]([O-])=O)C2=C(O)C3=C(OC2=O)C=CC=C3	0	0	0	1	0	0	1	0	0
CCN(CC)C(=O)N[C@H]1CN(C)[C@H]2CC3=CNC4=C3C(=CC=C4)C2=C1	0	0	1	0	1	1	0	1	subs/inhib
C[C@]12CC[C@H]3[C@@H](CCC4=CC5=C(C[C@]34C)C=NO5)[C@@H]1CC[C@@]2(O)C#C	1	1	1	1	0	1	subs/inhib	0	subs/inhib
C[C@]12CC[C@H]3[C@@H](CCC4=CC(=O)CC[C@H]34)[C@@H]1CC[C@@]2(O)C#C	0	0	0	1	0	0	1	0	0
ClC1=CC=CC(Cl)=C1N=C2NCCN2	0	1	0	0	0	0	0	0	0
CC(=O)OCC(=O)[C@@]1(O)CC[C@H]2[C@@H]3CCC4=CC(=O)C=C[C@]4(C)[C@@]3(F)[C@@H](O)C[C@]12C	0	1	1	0	0	0	0	0	0
CC1=C(C=CC=C1NC2=C(C=CC=N2)C(O)=O)C(F)(F)F	0	0	0	0	0	0	0	0	0
C[C@@H](NCCCC1=CC=CC(=C1)C(F)(F)F)C2=CC=CC3=CC=CC=C23	1	1	1	0	1	1	0	subs/inhib	subs/inhib
CNC(C)[C@@H](O)C1=CC=C(O)C=C1	0	0	0	0	0	0	0	0	0
OC1=CC=C(C=C1C([O-])=O)\N=N\C2=CC=C(O)C(=C2)C([O-])=O		0		0	0	0	NA	0	NA
COC1CC(C[N+](C)(C)C1)=C(C2=CC=CS2)C3=CC=CS3	0			0	1	0	0	NA	NA
CC(C)(C)NCC(O)C1=CC(Cl)=C(N)C(=C1)C(F)(F)F	0	1	0	0	0	0	0	0	0
OC1=CC(=O)NC=C1Cl	0	0	0	0	0	0	0	0	0
CC1=C(SC2=CC=NC=C2)C3=C(C=C1)N=C(N)N=C3O	0	0	1	1	1	1	1	1	subs/inhib
ClC1=CC=C(C=C1)\C=N\NC(=N)N\N=C/C2=CC=C(Cl)C=C2	0	0	0	0	0	1	0	0	1
CC(C)(CO)C(O)C(=O)NCCC(=O)NCCSSCCNC(=O)CCNC(=O)C(O)C(C)(C)CO	0	0	0	0	0	0	0	0	0
O=C1NC=CC(=O)N1		1	0	0	0	0	NA	0	0
ClC1=CC=CC(=C1)C(N2C=CN=C2)C3=CC4=C(NC=N4)C=C3		0	1	1	0	1	NA	0	subs/inhib
CCCC1CCCCN1			0	0	0	0	NA	NA	0
CC(C)C1CCC(C)CC1OC(=O)C2=C(O)C=CC=C2	0	0	0	0	0	0	0	0	0
O=C(OC1C[C@H]2CC3C[C@@H](C1)N2CC3=O)C4=CNC5=CC=CC=C45	0	0	0				NA	NA	NA
CCCOC(C(=O)OC1CCN(C)CC1)(C2=CC=CC=C2)C3=CC=CC=C3	0	0	1	0	1	1	0	1	subs/inhib
CC1(C)CCC(C)(C)C2=C1C=CC(NC(=O)C3=CC=C(C=C3)C(O)=O)=C2	0	0	0	0	0	0	0	0	0
C1CCN2C[C@@H]3C[C@@H](CN4CCCC[C@H]34)[C@@H]2C1	0	1	0	0	0	0	0	0	0
CC1=NC(NC2=NC=C(S2)C(=O)NC3=C(C)C=CC=C3Cl)=CC(=N1)N4CCN(CCO)CC4	0	0	1	0	0	0	0	0	0
CN1CCC[C@@H]1CC2=CNC3=C2C=C(CCS(=O)(=O)C4=CC=CC=C4)C=C3	0	1	0	0	0	1	0	0	1
O[C@@H]1CCCNC1CC(=O)CN2C=NC3=CC(Br)=C(Cl)C=C3C2=O		1		0	0	0	NA	0	NA
O[As](O)(=O)C1=CC=C(C=C1)[N+]([O-])=O	0	0	0	0	0	0	0	0	0
CCOC(=O)C1=C(O)C=CC=C1	0	0	0	0	0	0	0	0	0
CN1C(CCCC(O)=O)=NC2=C1C=CC(=C2)N(CCCl)CCCl	1	1	1	0	0	0	0	0	0
C[C@]1(O)CC[C@H]2[C@@H]3CC[C@H]4CC5=NON=C5C[C@]4(C)[C@H]3CC[C@]12C	1		1	0	0	0	0	NA	0
CC(N(CC1=C(N)N=C(C)N=C1)C=O)=C(CCO)SSC(CCO)=C(C)N(CC2=C(N)N=C(C)N=C2)C=O	1	0	0	0	0	0	0	0	0
CC1=C(C)C(=O)C(C(CCCCCC(O)=O)C2=CC=CC=C2)=C(C)C1=O	1	0	0	0	0	1	0	0	1
CC1=CC(C)=C(NC(=O)CN(CC(O)=O)CC(O)=O)C(C)=C1Br	0		1	0	0	0	0	NA	0
CCCC(=O)OC[C@@H](OC(=O)CCC)[C@@H](OC(=O)CCC)[C@H](CN1C2=NC(=O)NC(=O)C2=NC3=C1C=C(C)C(C)=C3)OC(=O)CCC	1	1	1	0	1	1	0	subs/inhib	subs/inhib
CCCCOC(=O)CC(CC(=O)OCCCC)(OC(C)=O)C(=O)OCCCC	1	1	1	1	0	1	subs/inhib	0	subs/inhib
NC(=N)NN=C(C=CC1=CC=C(O1)[N+]([O-])=O)C=CC2=CC=C(O2)[N+]([O-])=O			1	0	1	1	NA	NA	subs/inhib
NS(=O)(=O)C1=C(Cl)C=C(NCC2=CC=CS2)C(=C1)C3=NNN=N3	0	0	0	0	0	1	0	0	1
CCOCCN1C(=NC2=C1C=CC=C2)N3CCCN(C)CC3	0	1	0	0	1	0	0	subs/inhib	0
CCOC(=O)[C@H](CCC1=CC=CC=C1)N[C@@H](C)C(=O)N2[C@@H](CN(C)C2=O)C(O)=O	0	0	0	0	0	0	0	0	0
ClC1=CC=C(NC2=C3C=CC=CC3=C(CC4=CC=NC=C4)N=N2)C=C1	0	1	1	1	1	1	1	subs/inhib	subs/inhib
C[N+]4(CC1COC(O1)(C2CCCCC2)C3=CC=CC=C3)CCCCC4	0			0	1	0	0	NA	NA
CO\N=C(\C(=O)N[C@H]1[C@H]2SCC(C[N+]3=C4C=CC=NN4C=C3)=C(N2C1=O)C([O-])=O)C5=NSC(N)=N5	0	0	0	0	0	0	0	0	0
CCOC(=O)[C@H](CCC1=CC=CC=C1)N[C@@H](C)C(=O)N(CC(O)=O)C2CC3=C(C2)C=CC=C3	0	0	0	0	0	1	0	0	1
O=C(NC1=C2OC(=CC(=O)C2=CC=C1)C3=NNN=N3)C4=CC=C(OCCCCC5=CC=CC=C5)C=C4		0	1	1	0	0	NA	0	0
CC1=CC=C(C=C1)C(=O)C2=CC(O)=C(O)C(=C2)[N+]([O-])=O	1	0	0	1	0	0	subs/inhib	0	0
CCC(=O)N[S+]([O-])(=O)C1=CC=C(C=C1)C2=C(C)ON=C2C3=CC=CC=C3	0	0	0	1	0	0	1	0	0
CC1=CC2=CC3=CC=CC(O)=C3C(O)=C2C(O)=C1	0	0	0	1	0	1	1	0	1
S=C(SSC(=S)N1CCCCC1)N2CCCCC2	0		0	0	0	0	0	NA	0
FC1=CC=C(C=C1)N2C=C(C3CCN(CCN4CCNC4=O)CC3)C5=C2C=CC(Cl)=C5	0	1	1	0	1	0	0	subs/inhib	0
CNS(=O)(=O)CCC1=CC2=C(NC=C2C3CCN(C)CC3)C=C1	0	0	0	0	0	0	0	0	0
CO\N=C(\C(=O)N[C@H]1[C@H]2SCC(C)=C(N2C1=O)C(=O)OCOC(=O)C(C)(C)C)C3=CSC(N)=N3	1	1	1	0	0	1	0	0	subs/inhib
CC1=CC(CC(O)=O)=C(NC2=C(Cl)C=CC=C2F)C=C1	1	0	1	0	0	0	0	0	0
CCOC(=O)C1=CC=C(NC(=O)CN2CCCCC2)C=C1	1	1	0	0	0	0	0	0	0
CN(C)C(=O)CNC(=O)CC1=CC=CC=C1	0	0	0	0	0	0	0	0	0
CCCCC1C(=O)NC(=O)N(C2CCCCC2)C1=O		0	0	0	0	0	NA	0	0
CCOC(=O)C1=C2CN(C)C(=O)C3=C(C=CC=C3I)N2C=N1	0	0	0	0	0	0	0	0	0
CC(C(O)C1=CC=CC=C1)N(C)CCOC(C2=CC=CC=C2)C3=CC=CC=C3	1	1	1	0	1	1	0	subs/inhib	subs/inhib
CCN(CC)CCNC(=O)C1=C(OCC=C)C=C(Cl)C=C1	0	1	0	0	1	0	0	subs/inhib	0
CC(C(=O)OCC(=O)N(C)C)C1=CC=C2OC3=C(CC2=C1)C=CC(C)=N3	0	0	0	0	0	0	0	0	0
CCOC1=NN=C(NS(=O)(=O)C2=CC=C(N)C=C2)C=C1	0	0	0	0	0	0	0	0	0
CC1(C)S[C@@H]2[C@H](NC(=O)C(C(=O)OC3=CC=C4CCCC4=C3)C5=CC=CC=C5)C(=O)N2[C@H]1C(O)=O	0	0	0	0	0	0	0	0	0
OCC(O)COP([O-])([O-])=O	0		0	0	0	0	0	NA	0
CCC1=CC2=C(S1)N3C(C)=NN=C3CN=C2C4=C(Cl)C=CC=C4	0	0	0	0	0	0	0	0	0
C[C@H](CSC(C)=O)C(=O)N1CCC[C@H]1C(=O)N[C@@H](CC2=CC=CC=C2)C(O)=O	0	1	0	0	0	0	0	0	0
CCOC(=O)[C@H](CCC1=CC=CC=C1)N[C@H]2CCCN3CCC[C@H](N3C2=O)C(O)=O	0	0	0	0	0	0	0	0	0
NC1=C2N=CN([C@@H]3O[C@H](CO)[C@@H](O)[C@@H]3O)C2=NC(F)=N1			1	0	0	0	NA	NA	0
COC(=O)C1=C(C)NC(C)=C(C1C2=C(C=CC=C2)[N+]([O-])=O)C(=O)OCC(C)=O	0	0	0	1	0	0	1	0	0
CC1=C(N(CC2=CC=C(OCCN3CCCCCC3)C=C2)C4=C1C=C(O)C=C4)C5=CC=C(O)C=C5	0	0	1	1	1	0	1	1	0
CC1=C(C)C(CC2=CNC=N2)=CC=C1	0	1	0	1	1	1	1	subs/inhib	1
CC(C)[C@@H](C)\C=C\[C@@H](C)[C@H]1CC[C@@H]2[C@]1(C)CCC\C2=C/C=C3/C[C@@H](O)C[C@H](O)C3=C		1		1	0	0	NA	0	NA
CC(C)COC1=C(C=C(C=C1)C2=NC(C)=C(S2)C(O)=O)C#N	0	0	0	0	0	0	0	0	0
COC1=CC=CC(=C1)C(=O)CCN[C@@H](C)[C@H](O)C2=CC=CC=C2	0	1	0	0	1	0	0	subs/inhib	0
CCN(CCO)CCN1C(CC2=CC=CC=C2)=NC3=C1C(=O)N(C)C(=O)N3C	0	0	0	0	0	0	0	0	0
CCOC(=O)NNC1=NN=C(C=C1)N(CC)CC(C)O	0	0	0	0	0	0	0	0	0
CC(=O)N(CC(O)CO)C1=C(I)C(C(=O)NCC(O)CO)=C(I)C(C(=O)NCCO)=C1I	0	0	0	0	0	0	0	0	0
COC1=C(OCC2CNC(=O)O2)C=CC=C1	0	0	0	0	0	0	0	0	0
CCCC1=C2OC(=CC(=O)C2=CC3=C1N(CC)C(=CC3=O)C(O)=O)C(O)=O	1	0		0	0	0	0	0	NA
OC1C(COC(=O)C2=CN=CC=C2)(COC(=O)C3=CN=CC=C3)CCCC1(COC(=O)C4=CN=CC=C4)COC(=O)C5=CN=CC=C5	1	1		1	0	1	subs/inhib	0	NA
CN1C(CSCC(F)(F)F)NC2=CC(Cl)=C(C=C2S1(=O)=O)S(N)(=O)=O	0	0	0	0	0	0	0	0	0
CCCC(CCC)C(N)=O	0	0	0	0	0	0	0	0	0
CN(C)CCOC1=CC2=C(SC3=C1C=C(Cl)C=C3)C=CC=C2	1	1	1	0	1	0	0	subs/inhib	0
CCO[C@H](CC1=CC=C(OCCC2=CC=C(OS(C)(=O)=O)C=C2)C=C1)C(O)=O	0	0	0	0	0	0	0	0	0
CC1=CC=CC(C)=C1NC(=O)C2=CC(=C(Cl)C=C2O)S(N)(=O)=O	0	0	0	0	0	0	0	0	0
COC[C@@H](N1CCN(C[C@H]1C)C2(C)CCN(CC2)C(=O)C3=C(C)N=CN=C3C)C4=CC=C(C=C4)C(F)(F)F	0	0	1	0	0	0	0	0	0
COC[C@H](N1CCN(C[C@@H]1C)C2(C)CCN(CC2)C(=O)C3=C(C)N=CN=C3C)C4=CC=C(C=C4)C(F)(F)F	1	1	0				NA	NA	NA
C[C@H]1CNCCC2=CC=C(Cl)C=C12	0	0	1	0	1	0	0	1	0
COP(=S)(OC)OC1=CC=C(C=C1)S(N)(=O)=O	0	0	0	1	0	0	1	0	0
COC(=O)N[C@H](C(=O)N[C@@H](CC1=CC=CC=C1)[C@@H](O)CN(CC2=CC=C(C=C2)C3=NC=CC=C3)NC(=O)[C@@H](NC(=O)OC)C(C)(C)C)C(C)(C)C	0	0	0	0	0	1	0	0	1
CN1CCC2=C(C1)C3=C(C=CC(C)=C3)N2CCC4=CN=C(C)C=C4	0	1	1	0	1	0	0	subs/inhib	0
ClC1=CC(Cl)=C(C=C1)[C@@H]2CS\C(S2)=C(\C#N)N3C=CN=C3	1	0	0	1	1	1	subs/inhib	1	1
CN1CCC(CC1)=C2C3=C(CCC4=C2N=CC=C4)C=CC=C3	1	0	0	0	1	0	0	1	0
CCC1(CC2=C(C1)C=CC=C2)C3=CNC=N3	0	1	0	1	1	1	1	subs/inhib	1
CC1(C)OC[C@@H](COC(=O)CCC2=CC=C(OC[C@@H](O)CNCCNC(=O)N3CCOCC3)C=C2)O1	0	1	0	0	0	0	0	0	0
FC1=C(Cl)C=C(NC2=C3C=C(NC(=O)C=C)C(OCCCN4CCOCC4)=CC3=NC=N2)C=C1	0	1	1	0	1	1	0	subs/inhib	subs/inhib
CCCN(CCC)C(=O)CC1=C(N=C2C=CC(Cl)=CN12)C3=CC=C(Cl)C=C3	1	0	1	0	0	1	0	0	subs/inhib
O=C(NCCCCC1CCN(CC1)C(=O)C2=CC=CC=C2)\C=C\C3=CN=CC=C3	0	0	1	0	0	0	0	0	0
OC(CCN1CCCCC1)(C2CC3CC2C=C3)C4=CC=CC=C4	0	1	1	0	1	1	0	subs/inhib	subs/inhib
CCNC(=O)NCCCOC1=CC=CC(CN2CCCCC2)=C1	0	1		0	0	0	0	0	NA
CC1=CC=C(\C=N\N2C(=S)SC=C2C3=CC=CC=C3)C=C1	1	1		1	0	1	subs/inhib	0	NA
CN(C(=S)OC1=CC2=C(CCC2)C=C1)C3=CC(C)=CC=C3	1	1	1	0	0	0	0	0	0
CCC(C(=O)NC(=O)NC(C)=O)C1=CC=CC=C1	0	0	0	0	0	0	0	0	0
CC(=O)SCC(CC(=O)C1=CC=C(C)C=C1)C(O)=O	0	1	0	0	0	0	0	0	0
CC(=O)OCC(=O)NC1=CC(=CC(NC(=O)COC(C)=O)=C1Cl)C#N	0	0	0	0	0	0	0	0	0
ClC1=CC=C(C=C1)S(=O)(=O)NC(=O)NN2CCCC2	0	0	0	0	0	0	0	0	0
O=C1[C@H]2[C@@H]3CC[C@@H](C3)[C@H]2C(=O)N1CCCCN4CCN(CC4)C5=NC=CC=N5	0	1	1	0	0	0	0	0	0
CC(C)(C)C1=NN=C(NS(=O)(=O)C2=CC=CC=C2)S1	0	0	0	0	0	0	0	0	0
O=C([C@H]1CCC(=O)N1)N2CCCCC2	0	0	1	0	0	0	0	0	0
OC(=O)CNC(=O)CNC(=O)CNC(=O)CSC(=O)C1=CC=CC=C1	0	0	0	0	0	0	0	0	0
CCN1C(NC2=CC=C(OCCN3CCCCC3)C=C2)C4=C(C=CC=C4)C1=O	0	1	1	0	0	0	0	0	0
CCOC(=O)CN1C=CC=C1C2=NC(=C(S2)C3=CC=C(OC)C=C3)C4=CC=C(OC)C=C4	1	1		1	0	0	subs/inhib	0	NA
CC(=O)OC1=CC=C(C=C1)C2(OC3=C(NC2=O)C=CC=C3)C4=CC=C(OC(C)=O)C=C4	1	1	1	1	0	0	subs/inhib	0	0
CO[C@@]1(NC(=O)CSC(F)F)[C@@H]2OCC(CSC3=NN=NN3CCO)=C(N2C1=O)C(O)=O		0	0	0	0	0	NA	0	0
C[C@H](CN1CCCC1)C(=O)C2=CC=C(C=C2)C(F)(F)F	0	1	0	0	1	0	0	subs/inhib	0
CC1=C(C=CC=C1)C(=O)NC2=CC(C)=C(C=C2)C(=O)N3CCCC(O)C4=C3C=CC(Cl)=C4	0	0	1	0	0	1	0	0	subs/inhib
CC1=CC=CC=C1C(=O)NC2=CC=C(C(=O)N3CCC[C@@H](O)C4=CC(Cl)=CC=C34)C(C)=C2	0	1	1				NA	NA	NA
CC(CCC1=CC2=C(OCO2)C=C1)NN	1			0	0	0	0	NA	NA
O=C(CCC1CCN(CC2=CC=CC=C2)CC1)C3=CC4=C(CCCCN4)C=C3	0	1	1	0	1	0	0	subs/inhib	0
FC1=C(C=CC=C1)C2=N[C@@H](NC(=O)C3=CC4=C(N3)C=CC=C4)C(=O)N5CCC6=C5C2=CC=C6	1	0	1	1	0	0	subs/inhib	0	0
CCCCCOC1=C(OCC)C=C(C=C1)C2SC(=O)NC2=O	1	0	0	1	0	1	subs/inhib	0	1
CC(C)CC1=CC=C(CCC2=CC3=C(S2)N4C(C)=NN=C4C(C)N=C3C5=C(Cl)C=CC=C5)C=C1	1	0	1	0	0	0	0	0	0
FC1=C(C=CC=C1)C2=N[C@H](NC(=O)C3=CC4=C(N3)C=CC=C4)C(=O)N5CCC6=C5C2=CC=C6	1	0	1	1	0	0	subs/inhib	0	0
CC(C(O)=O)C1=CC=C(\C=C2/CCCCC2=O)C=C1	0	0	0	0	0	0	0	0	0
CN1[C@H]2CC[C@@H]1C[C@@H](C2)NC(=O)N3C(=O)NC4=C3C=CC=C4	0	1	1	0	1	0	0	subs/inhib	0
CCCCCC1NC2=CC(=C(C=C2S(=O)(=O)N1)S(N)(=O)=O)C(F)(F)F	0	0	0	1	1	0	1	1	0
OC[C@@H](O)[C@H](CO)OCN1C=CN=C1[N+]([O-])=O	0			0	0	0	0	NA	NA
COC1=CC(NS(=O)(=O)C2=CC=C(N)C=C2)=NC(C)=N1	0	0	0	0	0	0	0	0	0
OC1=CC(=CC=C1)C2=C3C=CC(=N3)C(=C4C=CC(=N4)C(=C5C=CC(=N5)C(=C6CCC2=N6)C7=CC(O)=CC=C7)C8=CC(O)=CC=C8)C9=CC(O)=CC=C9	0	0					NA	NA	NA
CO\N=C(\C(=O)N[C@H]1[C@H]2SCC(CN3N=NC(C)=N3)=C(N2C1=O)C(O)=O)C4=CSC(N)=N4	0	0	0	0	0	0	0	0	0
CCOP(=O)(CC)OC1=CC=C(C=C1)[N+]([O-])=O	0	0	0	0	1	0	0	1	0
CCCCCCCCCCCCCCCCCCNC(=O)OC1CCN(CC1)C(=O)OC[C@H](COC(=O)N(CC2=[N+](CC)C=CC=C2)C(=O)C3=C(OC)C=CC=C3)OC	0	0	0	0	0	0	0	0	0
C\C(=N/O)C1=CC=C(OCC(=O)N2CCCCC2)C=C1	0	0	0	0	0	0	0	0	0
CC(=O)C1=CC=C(OCC(=O)N2CCCCC2)C=C1	0	0	0	0	0	0	0	0	0
CC1=NC(=CN1C2=CC=C(C=C2)[N+]([O-])=O)[N+]([O-])=O	0	0	0	0	0	0	0	0	0
CCCN(CCC)C(=O)C(CCC(=O)OCCCN1CCN(CCOC(=O)CC2=C(C)N(C(=O)C3=CC=C(Cl)C=C3)C4=C2C=C(OC)C=C4)CC1)NC(=O)C5=CC=CC=C5	0	0	1	1	1	1	1	1	subs/inhib
CCOC(=O)OCC\C(SC(=O)OCC)=C(/C)N(CC1=C(N)N=C(C)N=C1)C=O	1	0	1	0	1	1	0	1	subs/inhib
CCCOC(=O)CC1=CC(OC)=C(OCC(=O)N(CC)CC)C=C1	0	0	1	0	0	1	0	0	subs/inhib
COC1=CC(=CC(OC)=C1OC)C(=O)NC2CCCNC2	0	0	0	0	0	0	0	0	0
C(C1CN2CCC1CC2)N3C4=C(SC5=C3C=CC=C5)C=CC=C4	0	1	0	0	1	0	0	subs/inhib	0
CC\C=C(/C(=O)N[C@H]1[C@H]2SCC(COC(N)=O)=C(N2C1=O)C(=O)OCOC(=O)C(C)(C)C)C3=CSC(N)=N3	1	1	1	0	0	1	0	0	subs/inhib
CCN(CC)CC1=NC=CN1C2=C(C=C(C=C2)[N+]([O-])=O)C(=O)C3=C(Cl)C=CC=C3	0	1	1	0	1	1	0	subs/inhib	subs/inhib
NC(=N)C1=CC=C(OCCCOC2=CC=C(C=C2)C(N)=N)C=C1	1	1	1	0	0	0	0	0	0
CSCC[C@H](NC(=O)[C@H](CC1=CNC2=C1C=CC=C2)NC(=O)CCNC(=O)OC(C)(C)C)C(=O)N[C@@H](CC(O)=O)C(=O)N[C@@H](CC3=CC=CC=C3)C(N)=O	0	0	0	0	0	0	0	0	0
CCO[C@@H]1OC(=O)C[C@@H]1NC(=O)[C@@H]2CCCN2C(=O)[C@@H](NC(=O)C3=CC(Cl)=C(N)C=C3)C(C)(C)C	0	0	1	0	0	1	0	0	subs/inhib
CC(COC1=CC=CC=C1)NN			0	0	0	0	NA	NA	0
COC(=O)C1=C(C)NC(COC(N)=O)=C(C1C2=C(Cl)C(Cl)=CC=C2)C(=O)OC(C)C	0	0	1	1	0	1	1	0	subs/inhib
CCOC(=O)NC(C)(C)CC1=CC=C(Cl)C=C1	1	1	1	0	0	0	0	0	0
CCOC(=O)C1=CC=C(OCCN2C[C@H](O)[C@@H](O)[C@H](O)[C@H]2CO)C=C1	0	0	0	0	0	0	0	0	0
[truncated: 2,313 more rows]

## Sheet: Positive Cooperativity
Development of Robust QSAR Models for CYP2C9, CYP2D6, and CYP3A4 Catalysis and Inhibition
Eric Gonzalez*, Sankalp Jain*, Pranav Shah*, Nao Torimoto-Katori, Alexey Zakharov, Ðắc-Trung Nguyễn, Srilatha Sakamuru, Ruili Huang, Menghang Xia, R. Scott Obach, Cornelis E.C.A. Hop, Anton Simeonov & Xin Xu.
Drug Metabolism and Disposition
DMD-AR-2020-000320
Compounds Exhibiting Positive Cooperativity
Headers:
SMILES	Chemical Structure
AC50 (µM)	Potency of compound µM based on data derived from the P450-Glo assay. Derived from the Hill fit of the response curve, 50% of the maximum acitivity response.
Enzyme
SMILES	AC50 (uM)	Enzyme
CCC1(CCC(=O)NC1=O)c2ccccc2	21.8761	CYP3A4
Clc1ccc(CC(C)(C)NC(=O)OCC)cc1	17.3768	CYP3A4
NCCNCCNCCNCCN	2.82576	CYP3A4
CN1CCN(CC1)C2=CC=C(NC3=NC=C4C(=O)N(C5=NC6=C(C=CC=C6)[N]5C4=N3)C7=C(C)C=CC=C7C)C=C2	0.477237	CYP3A4
C[C@]12CC[C@H]3[C@@H](CCC4=CC(=CC=C34)O)[C@@H]1CC[C@@H]2OC(=O)CCC5CCCC5	2.6837	CYP3A4
CO.COc4cc(Nc3c(C#N)cnc2cc(OCCCN1CCN(C)CC1)c(OC)cc23)c(Cl)cc4Cl	3.46713	CYP3A4
O=C(Nc1ccc(cc1)[N+]([O-])=O)Nc2ccc(cc2)[N+]([O-])=O	15.4871	CYP3A4
Cl.O=C(NC3CCN(CCc1cnc2ccccc12)CC3)c4ccccc4	17.3768	CYP3A4
O=C(O)CN(CCN(CC(=O)O)CC(=O)O)CCN(CC(=O)O)CC(=O)O	7.5637	CYP3A4
O=C(NC1=NN=C(O1)C2=CC3=C(OCCO3)C=C2)C4CCCCC4	11.9877	CYP3A4
COC(=O)N1CCC(CC1)[N]2N=CC3=C(N=C(N=C23)C4=CC=C(NC(=O)NC5=CC=C(CO)C=C5)C=C4)N6CCOCC6	3.37858	CYP3A4
CCCC1=CC2=C(N=CN=C2S1)N3CCN(CC3)/C4=N/CC(C)(C)S4	3.01116	CYP3A4
O=C(O)/C=C/C(=O)O.O=C(CCC2CCN(Cc1ccccc1)CC2)c3ccc4CCCCNc4c3	13.8029	CYP3A4
CCNC1(CCN(CC1)C2=C3N=C([N](C4=CC=C(Cl)C=C4)C3=NC=N2)C5=CC=CC=C5Cl)C(N)=O	0.952213	CYP3A4
Oc3ccc4ncc(CCCCN1CC=C(CC1)c2ccccc2)c4c3	2.45454	CYP3A4
CC1=C(C(=O)N2CCN(CC2)C3=C(Cl)C=C(C=C3)[N+]([O-])=O)C(=NO1)C4=CC=CC=C4	1.34504	CYP3A4
COC1=CC=C2[NH]C(=NC2=N1)[S+]([O-])CC3=C(C)C(=C(C)C=N3)OC	30.1116	CYP2D6
O=C(O)c1ccccn1	7.76194	CYP3A4
Fc1ccc(cc1)OCCCN2CCC4(CC2)C(=O)NCN4c3ccccc3	12.3018	CYP3A4
Br.Oc1cc(cc(O)c1)C(O)CNC(C)Cc2ccc(O)cc2	0.001096	CYP3A4
Nc1ncc2C[C@H]3N(CCC[C@@H]3Cc2n1)CCC	24.5454	CYP3A4
O=C(O)C2=CN(CC)c1cc(c(F)cc1C2=O)N3CCNCC3	19.4971	CYP3A4
CN1CCN(CC1)C2=CC=C(NC3=NC=C4C(=O)N(CC=C)N(C5=CC=CC(=N5)C(C)(C)O)C4=N3)C=C2	3.01116	CYP3A4
CN1CCN(CC1)C2=CC=C(OC(F)(F)F)C(=C2)NC3=NC4=C(CCC5=C4[N](CCO)N=C5C(N)=O)C=N3	6.00806	CYP3A4
CC(=O)OCC(=O)[C@@]54N=C(C)O[C@@H]5C[C@@H]3[C@]4(C)C[C@H](O)[C@H]2[C@H]3CCC1=CC(=O)C=C[C@@]12C	13.8029	CYP3A4
C[C@H](CCCC(C)(C)O)[C@H]1CC[C@H]2[C@@H]3C/C=C4/C[C@@H](O)CC[C@]4(C)[C@H]3CC[C@]12C	1.34504	CYP3A4
O=C(NC1=CC=CC=C1)N2CCN(CC2)C3=NC(=NS3)C4=CC=CC=C4	1.50916	CYP3A4
OC[C@@H]1[C@@H](O)[C@H](O)[C@@H](O)CN1CCCC	21.8761	CYP3A4
O=C(O)c2ccccc2Nc1cccc(C)c1C	17.3768	CYP3A4
CC(=O)OC1=CC=C(Cl)C2=C1N=CC=C2	26.837	CYP3A4
COC1=CC=C2C=C(OCC3(CN(C3)C(=O)C4=CC=C(F)C=C4)C(O)=O)C=CC2=C1	26.837	CYP3A4
CC1(CCCN1)C2=NC3=C(C=CC=C3[NH]2)C(N)=O	10.684	CYP3A4
CC(C)(C)c1ccc(cc1)C(=O)CCCN2CCC(CC2)OC(c3ccccc3)c4ccccc4	3.09008	CYP3A4
CN(C)C(=O)C(CCN1CCC(O)(CC1)C2=CC=C(Cl)C=C2)(C3=CC=CC=C3)C4=CC=CC=C4	2.13174	CYP3A4
OC(=O)C[C@H]1CC[C@@H](CC1)C2=CC=C(C=C2)C3=NC=C(NC4=CC=C(N=C4)C(F)(F)F)C=C3	4.77237	CYP3A4
O=C(OCC)C(\C#N)=C(\c1ccccc1)c2ccccc2	6.16552	CYP3A4
Clc5ccc6CCc1ccccc1N(CCCN2CCC4(CC2)C(=O)NC3CCCCN34)c6c5	7.76194	CYP3A4
Oc1c(I)cc(I)c2cccnc12	1.94971	CYP3A4
CN1CCC2=C(C=C(O)C(=C2)Cl)[C@H](C1)C3=CC=CC4=C3OCC4	13.4504	CYP3A4
O=C(c1ccc(cc1O)OCCCCCCCC)c2ccccc2	17.3768	CYP3A4
C[N]1N=CC=C1C2=C3C=CC=CC3=C(N=N2)N4CCC(CC4)N(C)C(=O)C5=C(C=C(F)C=C5)C(F)(F)F	2.13174	CYP3A4
CC(=O)O[C@@]4(C#C)CC[C@@H]3[C@]4(C)CC[C@H]2[C@H]3CCC1=C[C@H](CC[C@@H]12)OC(C)=O	2.39185	CYP3A4
O=C(O)CCCCCCNC2c3ccccc3CCc1ccccc12	1.54871	CYP3A4
CCOC1=C(NC(=O)\C=C\CN(C)C)C=C2C(=C1)N=CC(=C2NC3=CC(=C(F)C=C3)Cl)C#N	2.13174	CYP3A4
Oc2cccc1C[C@H](CCc12)N(CCC)CCc3cccs3	4.36486	CYP3A4
NC(=O)NC1=C(SC(=C1)C2=CC(=CC=C2)F)C(=O)NC3CCCNC3	11.9877	CYP3A4
NC1=NC=NC2=C1C(=N[N]2C3CCCN(C3)C(=O)C=C)C4=CC=C(OC5=CC=CC=C5)C=C4	0.600806	CYP3A4
NC1=NC(=N[N]1C2=NN=C3C(=C2)CCCC4=CC=CC=C34)NC5=CC=C6CC[C@@H](CCC6=C5)N7CCCC7	3.01116	CYP3A4
Cl.Cl.CC[C@@H](CO)NCCN[C@H](CO)CC	38.9018	CYP3A4
O=C1C=CC(=CO1)[C@H]6CC[C@@]5(O)[C@]6(C)CC[C@H]3[C@H]5CCC2=C[C@H](CC[C@@]23C)O[C@@H]4O[C@@H](C)[C@H](O)[C@@H](O)[C@H]4O	15.4871	CYP3A4
O=C(c1ccc(s1)C(C)C(=O)O)c2ccccc2	6.16552	CYP3A4
CN1C(=O)C(=C\C2=C1N=C(NC3=CC=CC(=C3)C(O)=O)N=C2)/C4=C(Cl)C=CC=C4Cl	18.9991	CYP3A4
CC1=C2CC[C@@H](C[C@H](O)C2=CC=C1)CN3CCC(CC3)C4=C(Cl)C=CC=C4Cl	9.52213	CYP3A4
COC1=CC(=CC=C1[N]2C=NC(=C2)C)/C=C/3CCCN([C@@H](C)C4=CC=C(F)C=C4)C3=O	0.75637	CYP3A4
CC(=O)OCC(=O)[C@@]4(OC(C)=O)[C@@H](C)C[C@@H]3[C@]4(C)C[C@H](O)[C@@]2(F)[C@H]3C[C@H](F)C1=CC(=O)C=C[C@@]12C	12.3018	CYP3A4
O=C2NC=Nc1ncnc12	13.8029	CYP3A4
Cl.O=C(OC)c1ccccc1C(=O)c3ccc(OCCN2CCCCC2)cc3	27.5404	CYP3A4
Brc1cc(Br)cc(Br)c1O	27.5404	CYP3A4
Fc1ccc(cc1)C(=O)CCCN2CCN(CC2)c3ccccn3	0.616553	CYP3A4
CC(=O)[C@H]4CC[C@@H]3[C@]4(C)CC[C@H]2[C@H]3CC=C1C[C@H](CC[C@@]12C)OC(C)=O	7.5637	CYP3A4
CCN(CC)CC1=C(O)C=CC(=C1)NC2=C3C=CC(=CC3=NC=C2)Cl	16.933	CYP3A4
N[S+]([O-])(=O)OC[C@@H]1C[C@H](C[C@@H]1O)[N]2C=CC3=C2N=CN=C3N[C@H]4CCC5=C4C=CC=C5	3.79083	CYP3A4
CCN(CCOc1ccc(cc1)Cc2ccccc2)CC	12.3018	CYP3A4
CC(C)(C)c1ccc(cc1)C(O)CCCN2CCC(CC2)C(O)(c3ccccc3)c4ccccc4	1.73768	CYP3A4
ClC(Cl)C(=O)N(C)c1ccc(cc1)OC(=O)c2ccco2	34.6713	CYP3A4
CN(C)[C@@]1(CC[C@]2(CC1)OCCC3=C2[NH]C4=C3C=C(F)C=C4)C5=CC=CC=C5	6.00806	CYP3A4
Fc1ccc(cc1)C(=O)CCCN2CCC(O)(CC2)c3ccc(Cl)cc3	9.7717	CYP3A4
Oc3cc4[C@@H]1[C@H](CCc2ccccc12)N(C)CCc4cc3Cl	2.75404	CYP3A4
OC(CN1CCC(CC1)CC2=CC=C(F)C=C2)C3=CC=C(Cl)C=C3	4.25338	CYP3A4
Oc1c(C=O)c(cnc1C)CO	15.4871	CYP3A4
Clc2cc(NC(=O)NC(=O)c1c(F)cccc1F)c(Cl)cc2OC(F)(F)C(F)C(F)(F)F	3.89018	CYP3A4
[O-][S+](=O)(C1=CC=C(NC(=O)\C2=C\CN(CC2)C3=C(C=CC=N3)C(F)(F)F)C=C1)C(F)(F)F	0.952213	CYP3A4
FC1=CC=CC(=C1)C2=CC=C(C=N2)C(=O)NC3CCN(CC3)CC(F)(F)F	4.25338	CYP3A4
NC1=NC(=O)N(C=C1)[C@@H]2O[C@H](CO)[C@@H](O)[C@@H]2O	21.3174	CYP3A4
CC(C)N(C)C(=O)N1CCC(=C/C1)\C2=C(C)[N](N=N2)C3=C(F)N=CC=C3	11.9877	CYP3A4
Cl.Cl.O=C(c1ccccc1)C(C)CN3CCN(CC(OCC)c2ccccc2)CC3	11.9877	CYP3A4
Cl.COc1cc2C(=O)C(Cc2cc1OC)CC4CCN(Cc3ccccc3)CC4	19.4971	CYP3A4
Oc1ccc(Cl)c2cccnc12	12.3018	CYP3A4
Cl.FC(F)(F)c1cccc(c1)C3(O)CCN(CCCC(=O)c2ccc(F)cc2)CC3	19.4971	CYP3A4
CC(=O)N1CCN(CCOC2=CC=C(C=C2)C3CCN(CC3)/C4=N/[N]5C(=NN=C5C(F)(F)F)CC4)CC1	3.01116	CYP3A4
[Na+].[Na+].O.O.N#C[Fe-2](C#N)(C#N)(N=O)(C#N)C#N	0.870904	CYP3A4
CCc1nc(N)nc(N)c1c2ccc(Cl)cc2	13.8029	CYP3A4
CC(=O)C4=CC[C@@H]3[C@]4(C)CC[C@H]2[C@H]3CC=C1C[C@H](CC[C@@]12C)OC(C)=O	5.49503	CYP3A4
O=C(N1CCN(CC1)c3nc2cc(OC)c(OC)cc2c(N)n3)c4ccco4	2.13174	CYP3A4
CC(=O)OCC(=O)[C@H]2CC[C@H]3[C@@H]4CCC1=CC(=O)CC[C@]1(C)[C@H]4CC[C@]23C	5.49503	CYP3A4
CC(=O)[C@@]3(OC(C)=O)C(=C)C[C@H]2[C@@H]4C=C(C)C1=CC(=O)CC[C@]1(C)[C@H]4CC[C@@]23C	15.4871	CYP3A4
O=C4CC[C@@]3(C)C(CC[C@@H]2[C@@H]3CC[C@@]1(C)[C@H]2CC[C@]1(C)O)=C4	2.54012	CYP3A4
CN1C(=O)N(C)C2=C([N](CCC(C)(C)C)C(=N2)OC3CCN(CC3)C(=O)C4CC4)C1=O	3.37858	CYP3A4
N\C(NCC1=CC=CC=C1)=N/C(=O)C2=NC(=C(N)N=C2N)Cl	30.1116	CYP3A4
BrCCCO	28.2576	CYP3A4
O=C(O)/C=C/C(=O)O.CC(C)NCC(O)COc1ccc(COCCOC(C)C)cc1.CC(C)NCC(O)COc1ccc(cc1)COCCOC(C)C	3.09008	CYP3A4
OC(C(C)N1CCC(CC1)Cc2ccccc2)c3ccc(O)cc3	15.4871	CYP3A4
Cl[In](Cl)Cl	35.5742	CYP3A4
Cl.O=C(OCC)NNc2nncc1ccccc12	27.5404	CYP3A4
CN(C)[C@@H]1CCC2=C(C1)C3=C([NH]2)C=CC(=C3)NC(=O)C4=CC=C(F)C=C4	23.9185	CYP3A4
O=C(NN1CCCCC1)c4nn(c2ccc(Cl)cc2Cl)c(c3ccc(Cl)cc3)c4C	13.8029	CYP3A4
COC1=C(OC)C(=CC(=C1)NC2=NC=C(F)C(=N2)NC3=CC=C4OC(C)(C)C(=O)N(CO[P](O)(O)=O)C4=N3)OC	11.9877	CYP3A4
CC(C)CC[N]1C(=NC2=C1C(=O)N(C)C(=O)N2C)CN3CCN(CC3)C(=O)C(C)C	8.48661	CYP3A4
O=C5CC[C@@]3(CC[C@H]2[C@@H]4C=CC1=CC(=O)CC[C@]1(C)[C@H]4CC[C@@]23C)O5	10.964	CYP3A4
CC(=O)[C@H]2CC[C@H]3[C@@H]4C=CC1=CC(=O)CC[C@@]1(C)[C@@H]4CC[C@]23C	2.75404	CYP3A4
CC1N(CCC2=CC=CC=C12)C3=NC(=NC(=C3C)C)NC4=CC=C(F)C=C4	5.35469	CYP3A4
OC1=C(I)C=C(C=C1I)[N+]([O-])=O	10.684	CYP3A4
COCCOC1=N[N](C2=CC=C(NC(=O)CCl)C=C2)C(=N1)C3=CC=C(Cl)C(=C3)Cl	3.01116	CYP3A4
COC1=C(OC)C=C(CCN2CCN(CCCC3=CC=CC=C3)CC2)C=C1	13.4504	CYP3A4
O=C(O)C(O)(CC(=O)O)CC(=O)O.CCN(CCCc1ccccc1)CCCc2ccccc2	19.4971	CYP3A4
CN1CCC(CC1)CNC2=N[N]3C(=NC=C3C4=CC=CC(=C4)OC(F)(F)F)C=C2	3.01116	CYP3A4
FC1=CC=C(CN2CCC(CC2)NC3=NC=NC4=C3C=C(Cl)S4)C=C1C#N	0.600806	CYP3A4
CCN1CCC[C@@H]1CNC(=O)C2=CC3=C(S\C(=C/C4=C(F)C=CC=C4)C(=O)N3)C=C2	3.37858	CYP3A4
IC1=CC=C(CN2CCC(CC2)C3(CCC(=O)NC3=O)C4=CC=CC=C4)C=C1	30.1116	CYP3A4
CC[N]1C(=NC2=C1C(=CN=C2C#CC(C)(C)O)CO[C@H]3CCCNC3)C4=NON=C4N	0.674115	CYP3A4
COC1=CC=C(C=C1)C2=C(C)C(=N[N]2C3=CC=C(Cl)C=C3Cl)C(=O)NN4CCCCC4	2.6837	CYP3A4
S=C2NC=Nc1ncnc12	30.9008	CYP2D6
Fc1ccc(cc1)C(=O)CCCN2CCC(O)(CC2)c3ccc(Br)cc3	13.8029	CYP3A4
c1ccccc1C(c2ccccc2)N3CCN(CC3)C/C=C/c4ccccc4	4.36486	CYP3A4
OC(=O)[C@@H]1CCCN1C(=O)[C@H](C)CS	24.5454	CYP3A4
CC(C)C1=NC(=NC(=C1)C2=C3C=CC=CC3=C(F)C=C2)N	0.674115	CYP3A4
CC(C)OC(=O)N1CCC(CC1)OC2=C3C=N[N](C4=CC=C(C=C4F)[S+](C)([O-])=O)C3=NC=N2	8.48661	CYP3A4
[Fe+3].[Na+].[O-]C(=O)CN(CC([O-])=O)CCN(CC([O-])=O)CC([O-])=O	1.34504	CYP3A4
CN(C)C(=O)C(CCN1CCC(O)(CC1)c2ccc(Cl)cc2)(c3ccccc3)c4ccccc4	1.54871	CYP3A4
COC1=CC=C2C(=CC=NC2=C1)NC(=O)NC3=NC(=CC=C3)C(F)(F)F	0.75637	CYP3A4
CC1=CC=C(C=C1)[S+]([O-])(=O)N2CCC[C@H]2C3=CC=C(F)C=C3	0.75637	CYP2C9
COC(=O)CC1CC(=N\O1)/C2=CC=C(O)C=C2	18.9991	CYP2C9
O=S(N)(=O)c1cc(c(OC)cc1)C(=O)OC	30.9008	CYP2C9
Nc1c(cccc1CC(N)=O)C(=O)c2ccccc2	17.3768	CYP2C9
O=C(O)CN3c1ccccc1C(=O)c2ccccc23	13.8029	CYP2C9
O=S(=O)(Nc1nccs1)c2ccc(N)cc2	15.4871	CYP2C9
Oc1ccc(cc1)C3=COc2cc(O)cc(O)c2C3=O	0.436486	CYP2C9
O=C(c1cc2nc(NC(=O)OC)nc2cc1)c3cccs3	3.46713	CYP2C9
Clc1nc(NCC)nc(NCC)n1	2.75404	CYP2C9
Oc1ccc(cc1)C(=O)OCCC	2.24458	CYP2C9
O=C(OC)Nc1nc2cc(ccc2n1)C(=O)c3ccccc3	10.964	CYP2C9
CC1=C(SC(=N1)NC(=O)N2CCCC2C(N)=O)C3=CSC(=N3)C(C)(C)C	10.684	CYP2C9
CCOC1=CC=C(CNC(=O)CN2C(=O)C3=CC=C[N]3C4=CC=C(F)C=C24)C=C1	0.75637	CYP2C9
Oc1cc(C)c(Cl)c(C)c1	13.8029	CYP2C9
N[S+]([O-])(=O)C1=CC(=C(Cl)C(=C1)[S+](N)([O-])=O)Cl	7.5637	CYP2C9
Nc1ccc(cc1)S(=O)(=O)NCc2ccccc2	9.7717	CYP2C9
OC(C(=O)c1ccccc1)c2ccccc2	2.75404	CYP2C9
O=S(=O)(CC)c1cc(c(OC)cc1)C(=O)OC	18.9991	CYP2C9
CC1=CC(=C(Cl)C(=C1Cl)C)O	7.5637	CYP2C9
FC1=CC=CC=C1CNCC2=CC=C(C=C2)C3=C4C=C[NH]C4=NC=C3	5.35469	CYP2C9
Clc1c(C(=O)OC)c(Cl)c(Cl)c(C(=O)OC)c1Cl	1.12495	CYP2C9
NS(=O)(=O)c2cc1c(NCNS1(=O)=O)cc2Cl	17.3768	CYP2C9
NS(=O)(=O)c1cc2C(=O)N(Cc2cc1Cl)C3CCCCC3	13.8029	CYP2C9
Clc1c(C(=O)OC)c(Cl)c(Cl)c(C(=O)OC)c1Cl	0.796407	CYP2C9
Clc1c(N)c(Cl)c(Cl)c(Cl)c1Cl	44.7853	CYP2C9
O=S(=O)(CC)c1cc(c(OC)cc1)C(=O)OC	13.8029	CYP2C9
Oc1ccc(cc1O)C(=O)OCC	19.4971	CYP2C9
Oc1ccc(cc1)C(=O)OC	15.4871	CYP2C9
O=S(N)(=O)c1cc(ccc1Cl)S(N)(=O)=O	24.5454	CYP2C9
COc2ccccc2OC(=O)Oc1ccccc1OC	17.3768	CYP2C9
Oc1ccc2c(c1)OC(=O)C=C2C	17.3768	CYP2C9
COc1cc(ccc1OCC(=O)N(CC)CC)CC(=O)OCCC	10.964	CYP2C9
Nc1ccc(cc1)S(=O)(=O)c2ccc(N)cc2	2.75404	CYP2C9
NS(=O)(=O)c2cc1c(CCCS1(=O)=O)cc2C	6.16552	CYP2C9
O=C1C=CC(=CO1)[C@H]6CC[C@@]5(O)[C@]6(C)CC[C@H]3[C@H]5CCC2=C[C@H](CC[C@@]23C)O[C@@H]4O[C@@H](C)[C@H](O)[C@@H](O)[C@H]4O	0.024545	CYP2C9
FC1=CC=CC(=C1)C2=CC=C(C=N2)C(=O)NC3CCN(CC3)CC(F)(F)F	10.684	CYP2C9
Cc1c(onc1C)N(C(C)=O)S(=O)(=O)c2ccc(N)cc2	19.4971	CYP2C9
Cl.O=C(c2cn(C)c1ccccc12)[C@H]3Cc4ncnc4CC3	6.16552	CYP2C9
O=C(CC)c1ccc(O)cc1	4.89745	CYP2C9
